# Supplementary material
Source: PubMed Central journal article supplement (PMC6245954)

## Supplementary Data

### Structure-Activity Relationship and Pharmacokinetic Studies of 3-*O*-Substitutedflavonols as Anti-Prostate Cancer Agents

Xiang Li<sup>a</sup>, Changde Zhang<sup>b,c</sup>, Shanchun Guo<sup>b,c</sup>, Pravien Rajaram<sup>a</sup>, Maizie Lee<sup>a</sup>, Guanglin Chen<sup>a</sup>, Ryan Fong<sup>a</sup>, Aaron Gonzalez<sup>a</sup>, Qiang Zhang<sup>b,c</sup>, Shilong Zheng<sup>b,c</sup>, Guangdi Wang<sup>b,c</sup>, and Qiao-Hong Chen<sup>a,\*</sup>

<sup>a</sup>Department of Chemistry, California State University, Fresno, 2555 E. San Ramon Avenue, M/S SB70, Fresno, CA 93740, USA

<sup>b</sup>Department of Chemistry and <sup>c</sup>RCMI Cancer Research Center, Xavier University of Louisiana, 1 Drexel Drive, New Orleans, LA 70125, USA

#### List of contents:

|                                                                      |     |
|----------------------------------------------------------------------|-----|
| <sup>1</sup> H NMR spectrum of <b>5</b> in CDCl <sub>3</sub> .....   | S5  |
| <sup>13</sup> C NMR spectrum of <b>5</b> in CDCl <sub>3</sub> .....  | S6  |
| <sup>1</sup> H NMR spectrum of <b>19</b> in CDCl <sub>3</sub> .....  | S7  |
| <sup>13</sup> C NMR spectrum of <b>19</b> in CDCl <sub>3</sub> ..... | S8  |
| <sup>1</sup> H NMR spectrum of <b>20</b> in CDCl <sub>3</sub> .....  | S9  |
| <sup>13</sup> C NMR spectrum of <b>20</b> in CDCl <sub>3</sub> ..... | S10 |
| <sup>1</sup> H NMR spectrum of <b>21</b> in CDCl <sub>3</sub> .....  | S11 |
| <sup>13</sup> C NMR spectrum of <b>21</b> in CDCl <sub>3</sub> ..... | S12 |
| <sup>1</sup> H NMR spectrum of <b>22</b> in CDCl <sub>3</sub> .....  | S13 |
| <sup>13</sup> C NMR spectrum of <b>22</b> in CDCl <sub>3</sub> ..... | S14 |
| <sup>1</sup> H NMR spectrum of <b>23</b> in CDCl <sub>3</sub> .....  | S15 |
| <sup>13</sup> C NMR spectrum of <b>23</b> in CDCl <sub>3</sub> ..... | S16 |
| <sup>1</sup> H NMR spectrum of <b>24</b> in CDCl <sub>3</sub> .....  | S17 |
| <sup>13</sup> C NMR spectrum of <b>24</b> in CDCl <sub>3</sub> ..... | S18 |
| <sup>1</sup> H NMR spectrum of <b>25</b> in CDCl <sub>3</sub> .....  | S19 |
| <sup>13</sup> C NMR spectrum of <b>25</b> in CDCl <sub>3</sub> ..... | S20 |
| <sup>1</sup> H NMR spectrum of <b>26</b> in CDCl <sub>3</sub> .....  | S21 |
| <sup>13</sup> C NMR spectrum of <b>26</b> in CDCl <sub>3</sub> ..... | S22 |
| <sup>1</sup> H NMR spectrum of <b>27</b> in CDCl <sub>3</sub> .....  | S23 |
| <sup>13</sup> C NMR spectrum of <b>27</b> in CDCl <sub>3</sub> ..... | S24 |

|                                                                      |     |
|----------------------------------------------------------------------|-----|
| <sup>1</sup> H NMR spectrum of <b>28</b> in CDCl <sub>3</sub> .....  | S25 |
| <sup>13</sup> C NMR spectrum of <b>28</b> in CDCl <sub>3</sub> ..... | S26 |
| <sup>1</sup> H NMR spectrum of <b>29</b> in CDCl <sub>3</sub> .....  | S27 |
| <sup>13</sup> C NMR spectrum of <b>29</b> in CDCl <sub>3</sub> ..... | S28 |
| <sup>1</sup> H NMR spectrum of <b>30</b> in CDCl <sub>3</sub> .....  | S29 |
| <sup>13</sup> C NMR spectrum of <b>30</b> in CDCl <sub>3</sub> ..... | S30 |
| <sup>1</sup> H NMR spectrum of <b>36</b> in CDCl <sub>3</sub> .....  | S31 |
| <sup>13</sup> C NMR spectrum of <b>36</b> in CDCl <sub>3</sub> ..... | S32 |
| <sup>1</sup> H NMR spectrum of <b>37</b> in CDCl <sub>3</sub> .....  | S33 |
| <sup>13</sup> C NMR spectrum of <b>37</b> in CDCl <sub>3</sub> ..... | S34 |
| <sup>1</sup> H NMR spectrum of <b>38</b> in CDCl <sub>3</sub> .....  | S35 |
| <sup>13</sup> C NMR spectrum of <b>38</b> in CDCl <sub>3</sub> ..... | S36 |
| <sup>1</sup> H NMR spectrum of <b>39</b> in CDCl <sub>3</sub> .....  | S37 |
| <sup>13</sup> C NMR spectrum of <b>39</b> in CDCl <sub>3</sub> ..... | S38 |
| <sup>1</sup> H NMR spectrum of <b>40</b> in CDCl <sub>3</sub> .....  | S39 |
| <sup>13</sup> C NMR spectrum of <b>40</b> in CDCl <sub>3</sub> ..... | S40 |
| <sup>1</sup> H NMR spectrum of <b>41</b> in CDCl <sub>3</sub> .....  | S41 |
| <sup>13</sup> C NMR spectrum of <b>41</b> in CDCl <sub>3</sub> ..... | S42 |
| <sup>1</sup> H NMR spectrum of <b>45</b> in CDCl <sub>3</sub> .....  | S43 |
| <sup>13</sup> C NMR spectrum of <b>45</b> in CDCl <sub>3</sub> ..... | S44 |
| <sup>1</sup> H NMR spectrum of <b>46</b> in CDCl <sub>3</sub> .....  | S45 |
| <sup>13</sup> C NMR spectrum of <b>46</b> in CDCl <sub>3</sub> ..... | S46 |
| <sup>1</sup> H NMR spectrum of <b>47</b> in CDCl <sub>3</sub> .....  | S47 |
| <sup>13</sup> C NMR spectrum of <b>47</b> in CDCl <sub>3</sub> ..... | S48 |
| <sup>1</sup> H NMR spectrum of <b>51</b> in CDCl <sub>3</sub> .....  | S49 |
| <sup>13</sup> C NMR spectrum of <b>51</b> in CDCl <sub>3</sub> ..... | S50 |
| <sup>1</sup> H NMR spectrum of <b>52</b> in CDCl <sub>3</sub> .....  | S51 |
| <sup>13</sup> C NMR spectrum of <b>52</b> in CDCl <sub>3</sub> ..... | S52 |
| <sup>1</sup> H NMR spectrum of <b>53</b> in CDCl <sub>3</sub> .....  | S53 |
| <sup>13</sup> C NMR spectrum of <b>53</b> in CDCl <sub>3</sub> ..... | S54 |
| <sup>1</sup> H NMR spectrum of <b>54</b> in CDCl <sub>3</sub> .....  | S55 |
| <sup>13</sup> C NMR spectrum of <b>54</b> in CDCl <sub>3</sub> ..... | S56 |
| <sup>1</sup> H NMR spectrum of <b>55</b> in CDCl <sub>3</sub> .....  | S57 |

|                                                                      |     |
|----------------------------------------------------------------------|-----|
| <sup>13</sup> C NMR spectrum of <b>55</b> in CDCl <sub>3</sub> ..... | S58 |
| <sup>1</sup> H NMR spectrum of <b>56</b> in CDCl <sub>3</sub> .....  | S59 |
| <sup>13</sup> C NMR spectrum of <b>56</b> in CDCl <sub>3</sub> ..... | S60 |
| <sup>1</sup> H NMR spectrum of <b>57</b> in CDCl <sub>3</sub> .....  | S61 |
| <sup>13</sup> C NMR spectrum of <b>57</b> in CDCl <sub>3</sub> ..... | S62 |
| <sup>1</sup> H NMR spectrum of <b>58</b> in CDCl <sub>3</sub> .....  | S63 |
| <sup>13</sup> C NMR spectrum of <b>58</b> in CDCl <sub>3</sub> ..... | S64 |
| <sup>1</sup> H NMR spectrum of <b>59</b> in CDCl <sub>3</sub> .....  | S65 |
| <sup>13</sup> C NMR spectrum of <b>59</b> in CDCl <sub>3</sub> ..... | S66 |
| <sup>1</sup> H NMR spectrum of <b>60</b> in CDCl <sub>3</sub> .....  | S67 |
| <sup>13</sup> C NMR spectrum of <b>60</b> in CDCl <sub>3</sub> ..... | S68 |
| <sup>1</sup> H NMR spectrum of <b>61</b> in CDCl <sub>3</sub> .....  | S69 |
| <sup>13</sup> C NMR spectrum of <b>61</b> in CDCl <sub>3</sub> ..... | S70 |
| <sup>1</sup> H NMR spectrum of <b>62</b> in CDCl <sub>3</sub> .....  | S71 |
| <sup>13</sup> C NMR spectrum of <b>62</b> in CDCl <sub>3</sub> ..... | S72 |
| <sup>1</sup> H NMR spectrum of <b>63</b> in CDCl <sub>3</sub> .....  | S73 |
| <sup>13</sup> C NMR spectrum of <b>63</b> in CDCl <sub>3</sub> ..... | S74 |
| <sup>1</sup> H NMR spectrum of <b>67</b> in CDCl <sub>3</sub> .....  | S75 |
| <sup>13</sup> C NMR spectrum of <b>67</b> in CDCl <sub>3</sub> ..... | S76 |
| <sup>1</sup> H NMR spectrum of <b>68</b> in CDCl <sub>3</sub> .....  | S77 |
| <sup>13</sup> C NMR spectrum of <b>68</b> in CDCl <sub>3</sub> ..... | S78 |
| <sup>1</sup> H NMR spectrum of <b>69</b> in CDCl <sub>3</sub> .....  | S79 |
| <sup>13</sup> C NMR spectrum of <b>69</b> in CDCl <sub>3</sub> ..... | S80 |
| <sup>1</sup> H NMR spectrum of <b>70</b> in CDCl <sub>3</sub> .....  | S81 |
| <sup>13</sup> C NMR spectrum of <b>70</b> in CDCl <sub>3</sub> ..... | S82 |
| <sup>1</sup> H NMR spectrum of <b>71</b> in CDCl <sub>3</sub> .....  | S83 |
| <sup>13</sup> C NMR spectrum of <b>71</b> in CDCl <sub>3</sub> ..... | S84 |
| <sup>1</sup> H NMR spectrum of <b>72</b> in CDCl <sub>3</sub> .....  | S85 |
| <sup>13</sup> C NMR spectrum of <b>72</b> in CDCl <sub>3</sub> ..... | S86 |
| <sup>1</sup> H NMR spectrum of <b>73</b> in CDCl <sub>3</sub> .....  | S87 |
| <sup>13</sup> C NMR spectrum of <b>73</b> in CDCl <sub>3</sub> ..... | S88 |
| <sup>1</sup> H NMR spectrum of <b>74</b> in CDCl <sub>3</sub> .....  | S89 |
| <sup>13</sup> C NMR spectrum of <b>74</b> in CDCl <sub>3</sub> ..... | S90 |

|                                                                      |      |
|----------------------------------------------------------------------|------|
| <sup>1</sup> H NMR spectrum of <b>75</b> in CDCl <sub>3</sub> .....  | S91  |
| <sup>13</sup> C NMR spectrum of <b>75</b> in CDCl <sub>3</sub> ..... | S92  |
| <sup>1</sup> H NMR spectrum of <b>76</b> in CDCl <sub>3</sub> .....  | S93  |
| <sup>13</sup> C NMR spectrum of <b>76</b> in CDCl <sub>3</sub> ..... | S94  |
| <sup>1</sup> H NMR spectrum of <b>77</b> in CDCl <sub>3</sub> .....  | S95  |
| <sup>13</sup> C NMR spectrum of <b>77</b> in CDCl <sub>3</sub> ..... | S96  |
| <sup>1</sup> H NMR spectrum of <b>78</b> in CDCl <sub>3</sub> .....  | S97  |
| <sup>13</sup> C NMR spectrum of <b>78</b> in CDCl <sub>3</sub> ..... | S98  |
| <sup>1</sup> H NMR spectrum of <b>79</b> in CDCl <sub>3</sub> .....  | S99  |
| <sup>13</sup> C NMR spectrum of <b>79</b> in CDCl <sub>3</sub> ..... | S100 |
| <sup>1</sup> H NMR spectrum of <b>80</b> in CDCl <sub>3</sub> .....  | S101 |
| <sup>13</sup> C NMR spectrum of <b>80</b> in CDCl <sub>3</sub> ..... | S102 |
| <sup>1</sup> H NMR spectrum of <b>81</b> in CDCl <sub>3</sub> .....  | S103 |
| <sup>13</sup> C NMR spectrum of <b>81</b> in CDCl <sub>3</sub> ..... | S104 |

---

**Corresponding author.**

\*E-mail: [qchen@csufresno.edu](mailto:qchen@csufresno.edu). Phone: (+1)5592782394. Fax: (+1)5592784402.



Xiang LI  
XL-35-62 HNMR CDCL3 300MHz

7.13  
7.10  
7.85  
7.85  
7.81  
7.26  
7.01  
7.00  
6.99  
6.98  
6.97  
6.96  
6.93  
6.92

3.99  
3.96  
3.93

**<sup>1</sup>H NMR of 5 in CDCl<sub>3</sub>  
300 MHz**

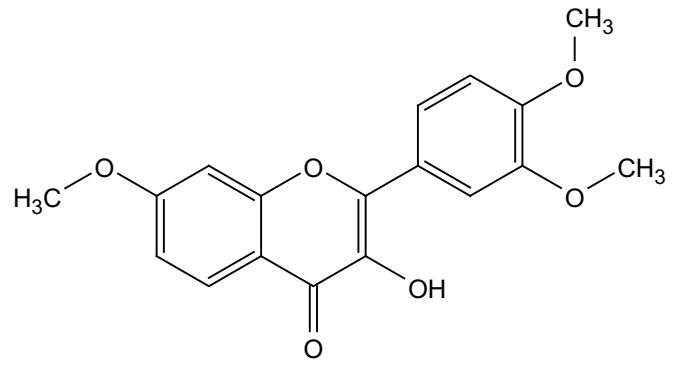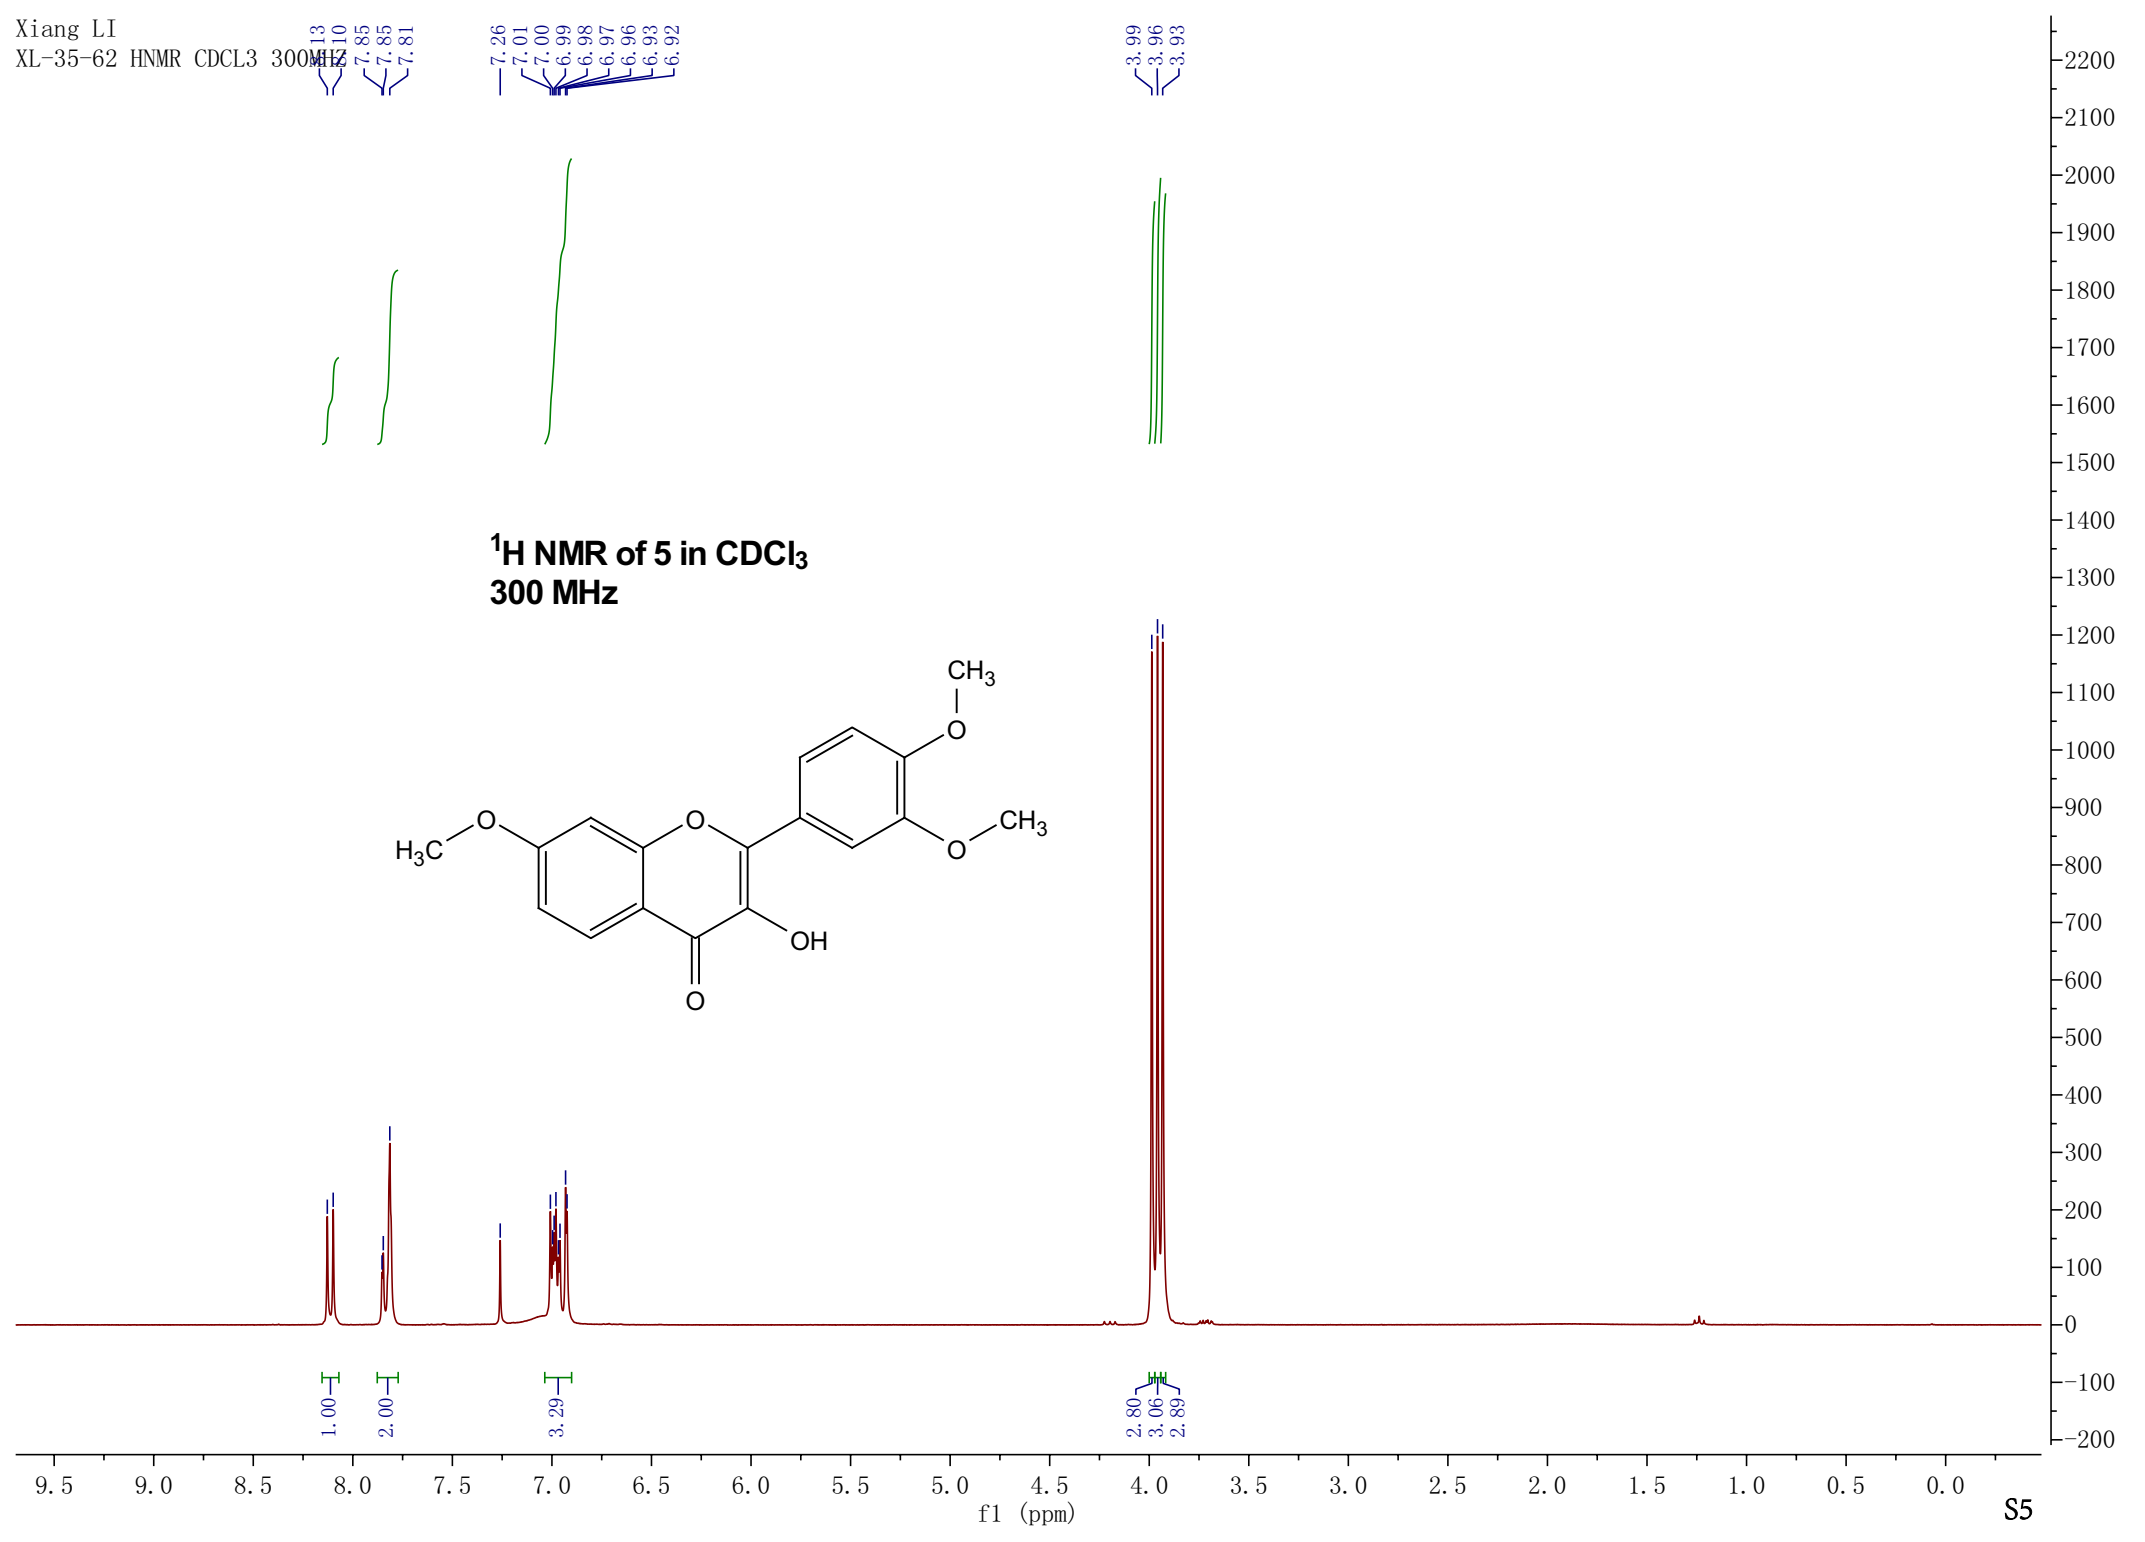

Xiang LI

XL-35-62 CNMR CDCl<sub>3</sub> 75MHz

**<sup>13</sup>C NMR of 5 in CDCl<sub>3</sub>  
75 MHz**

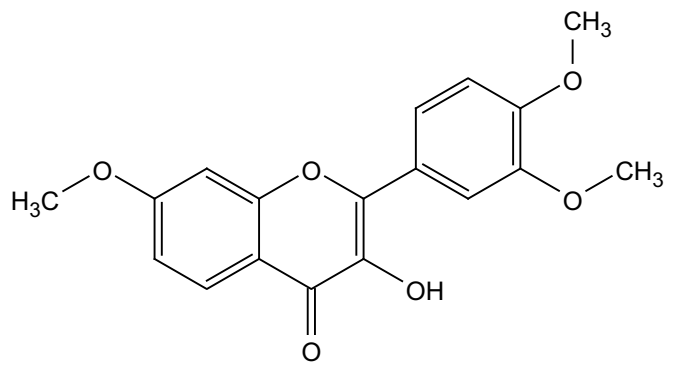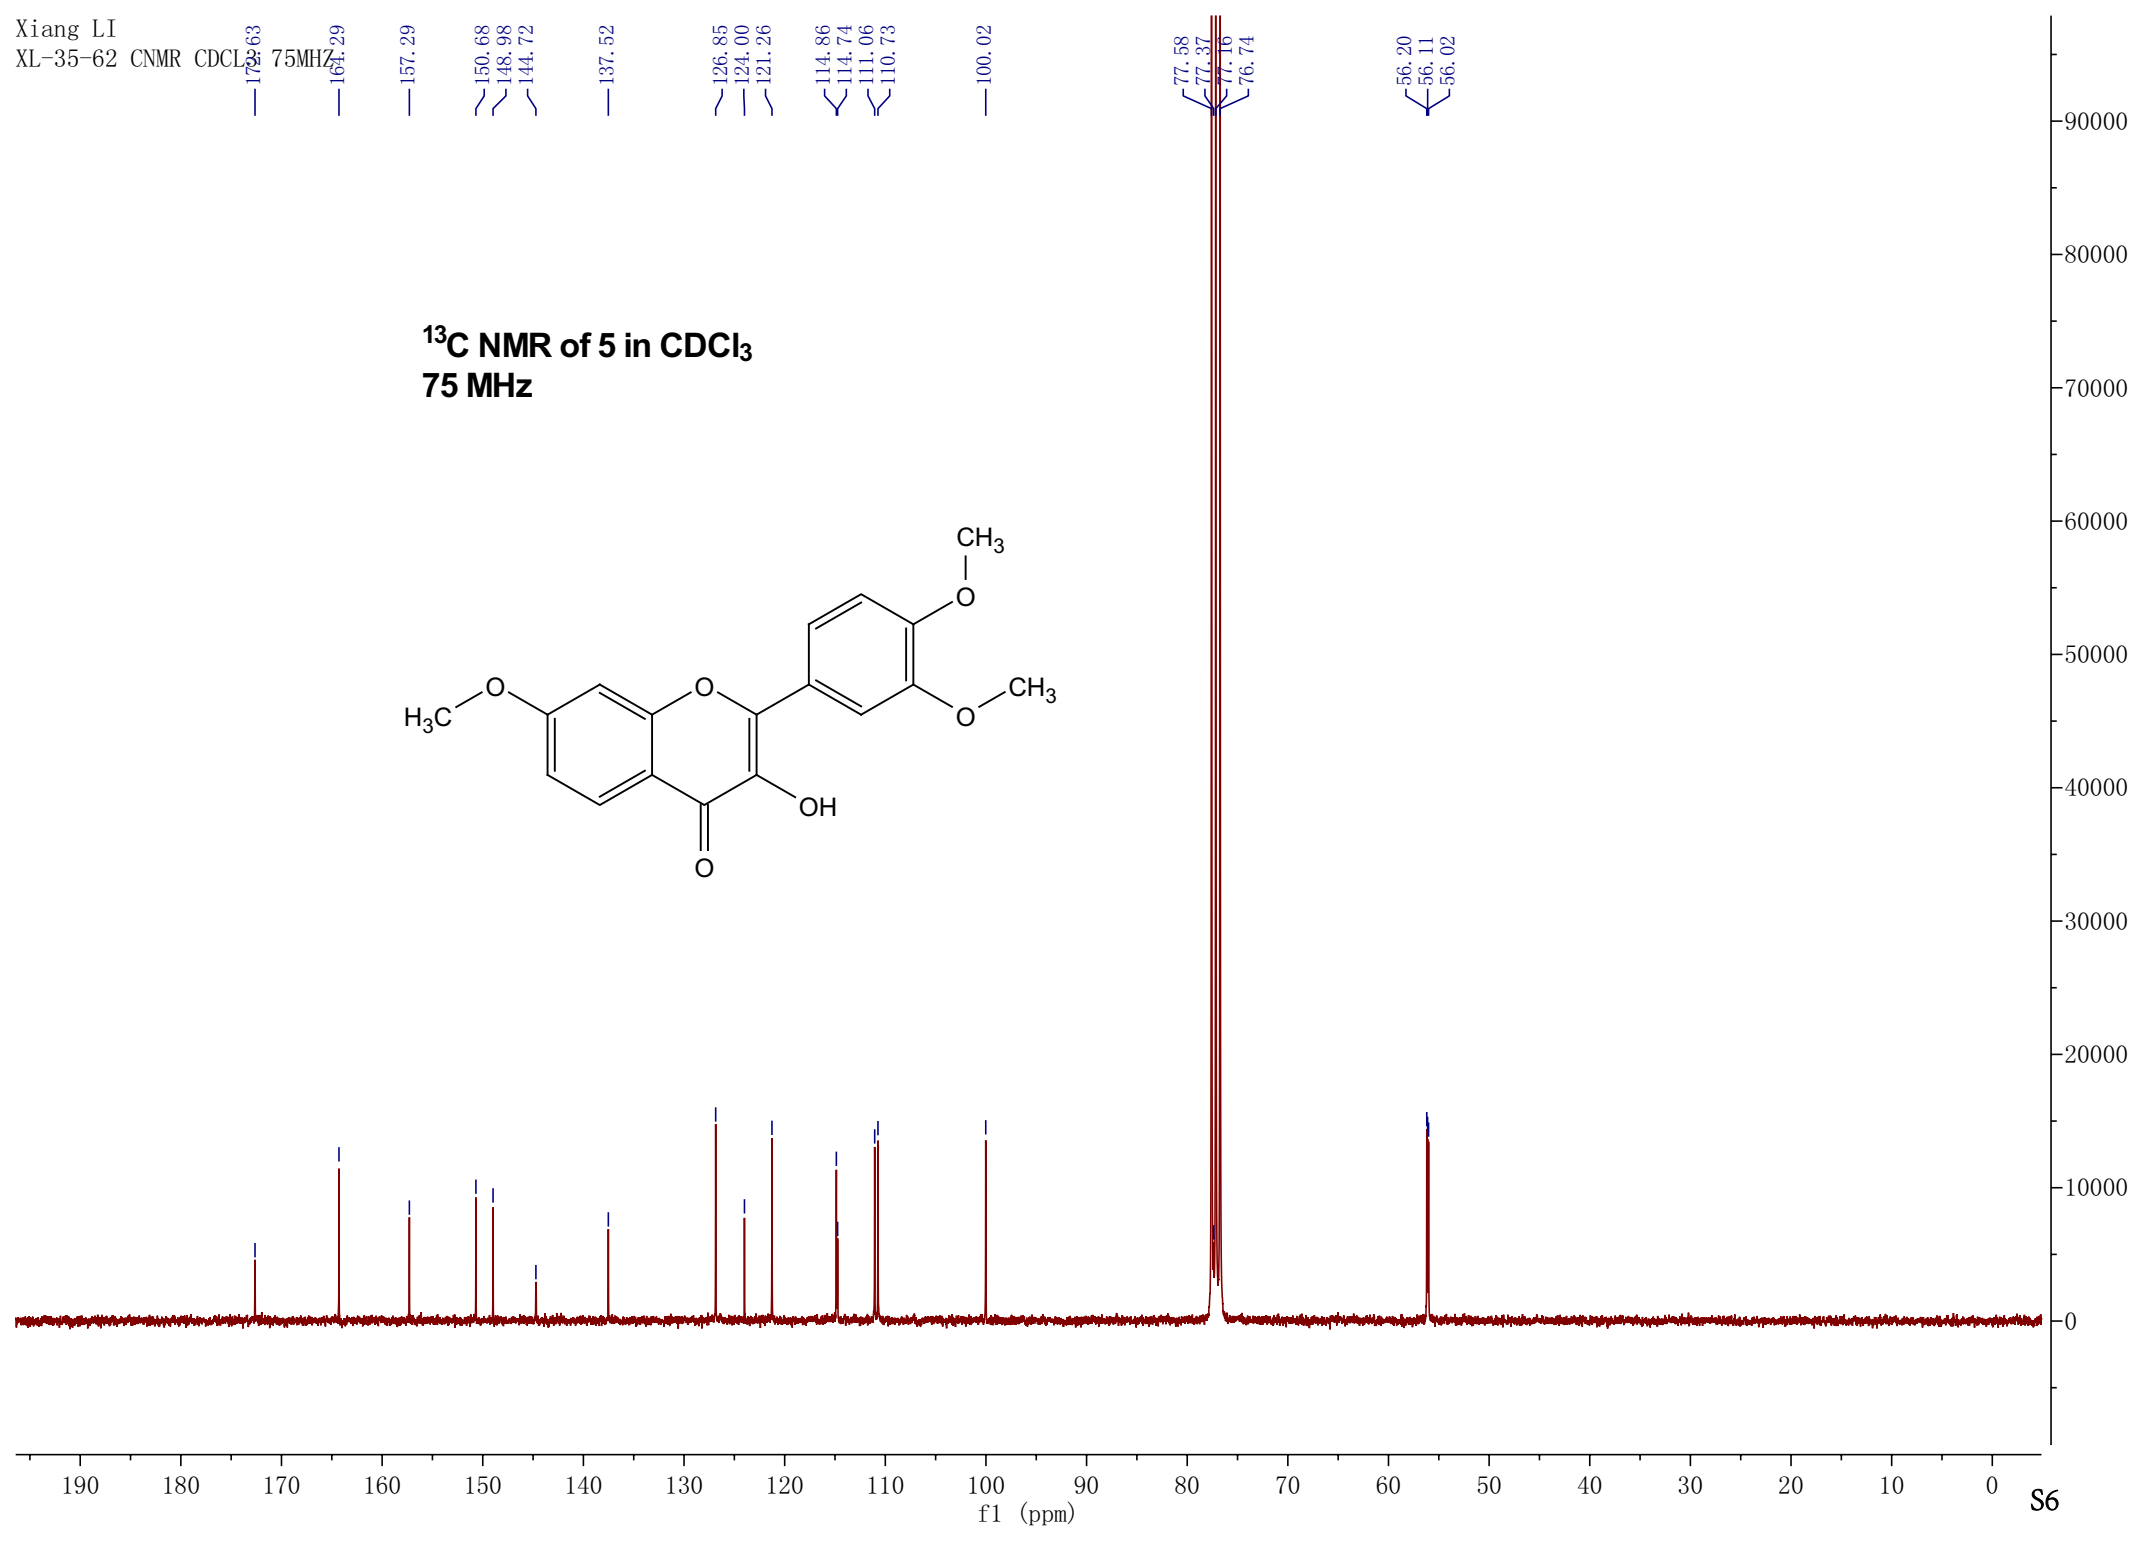

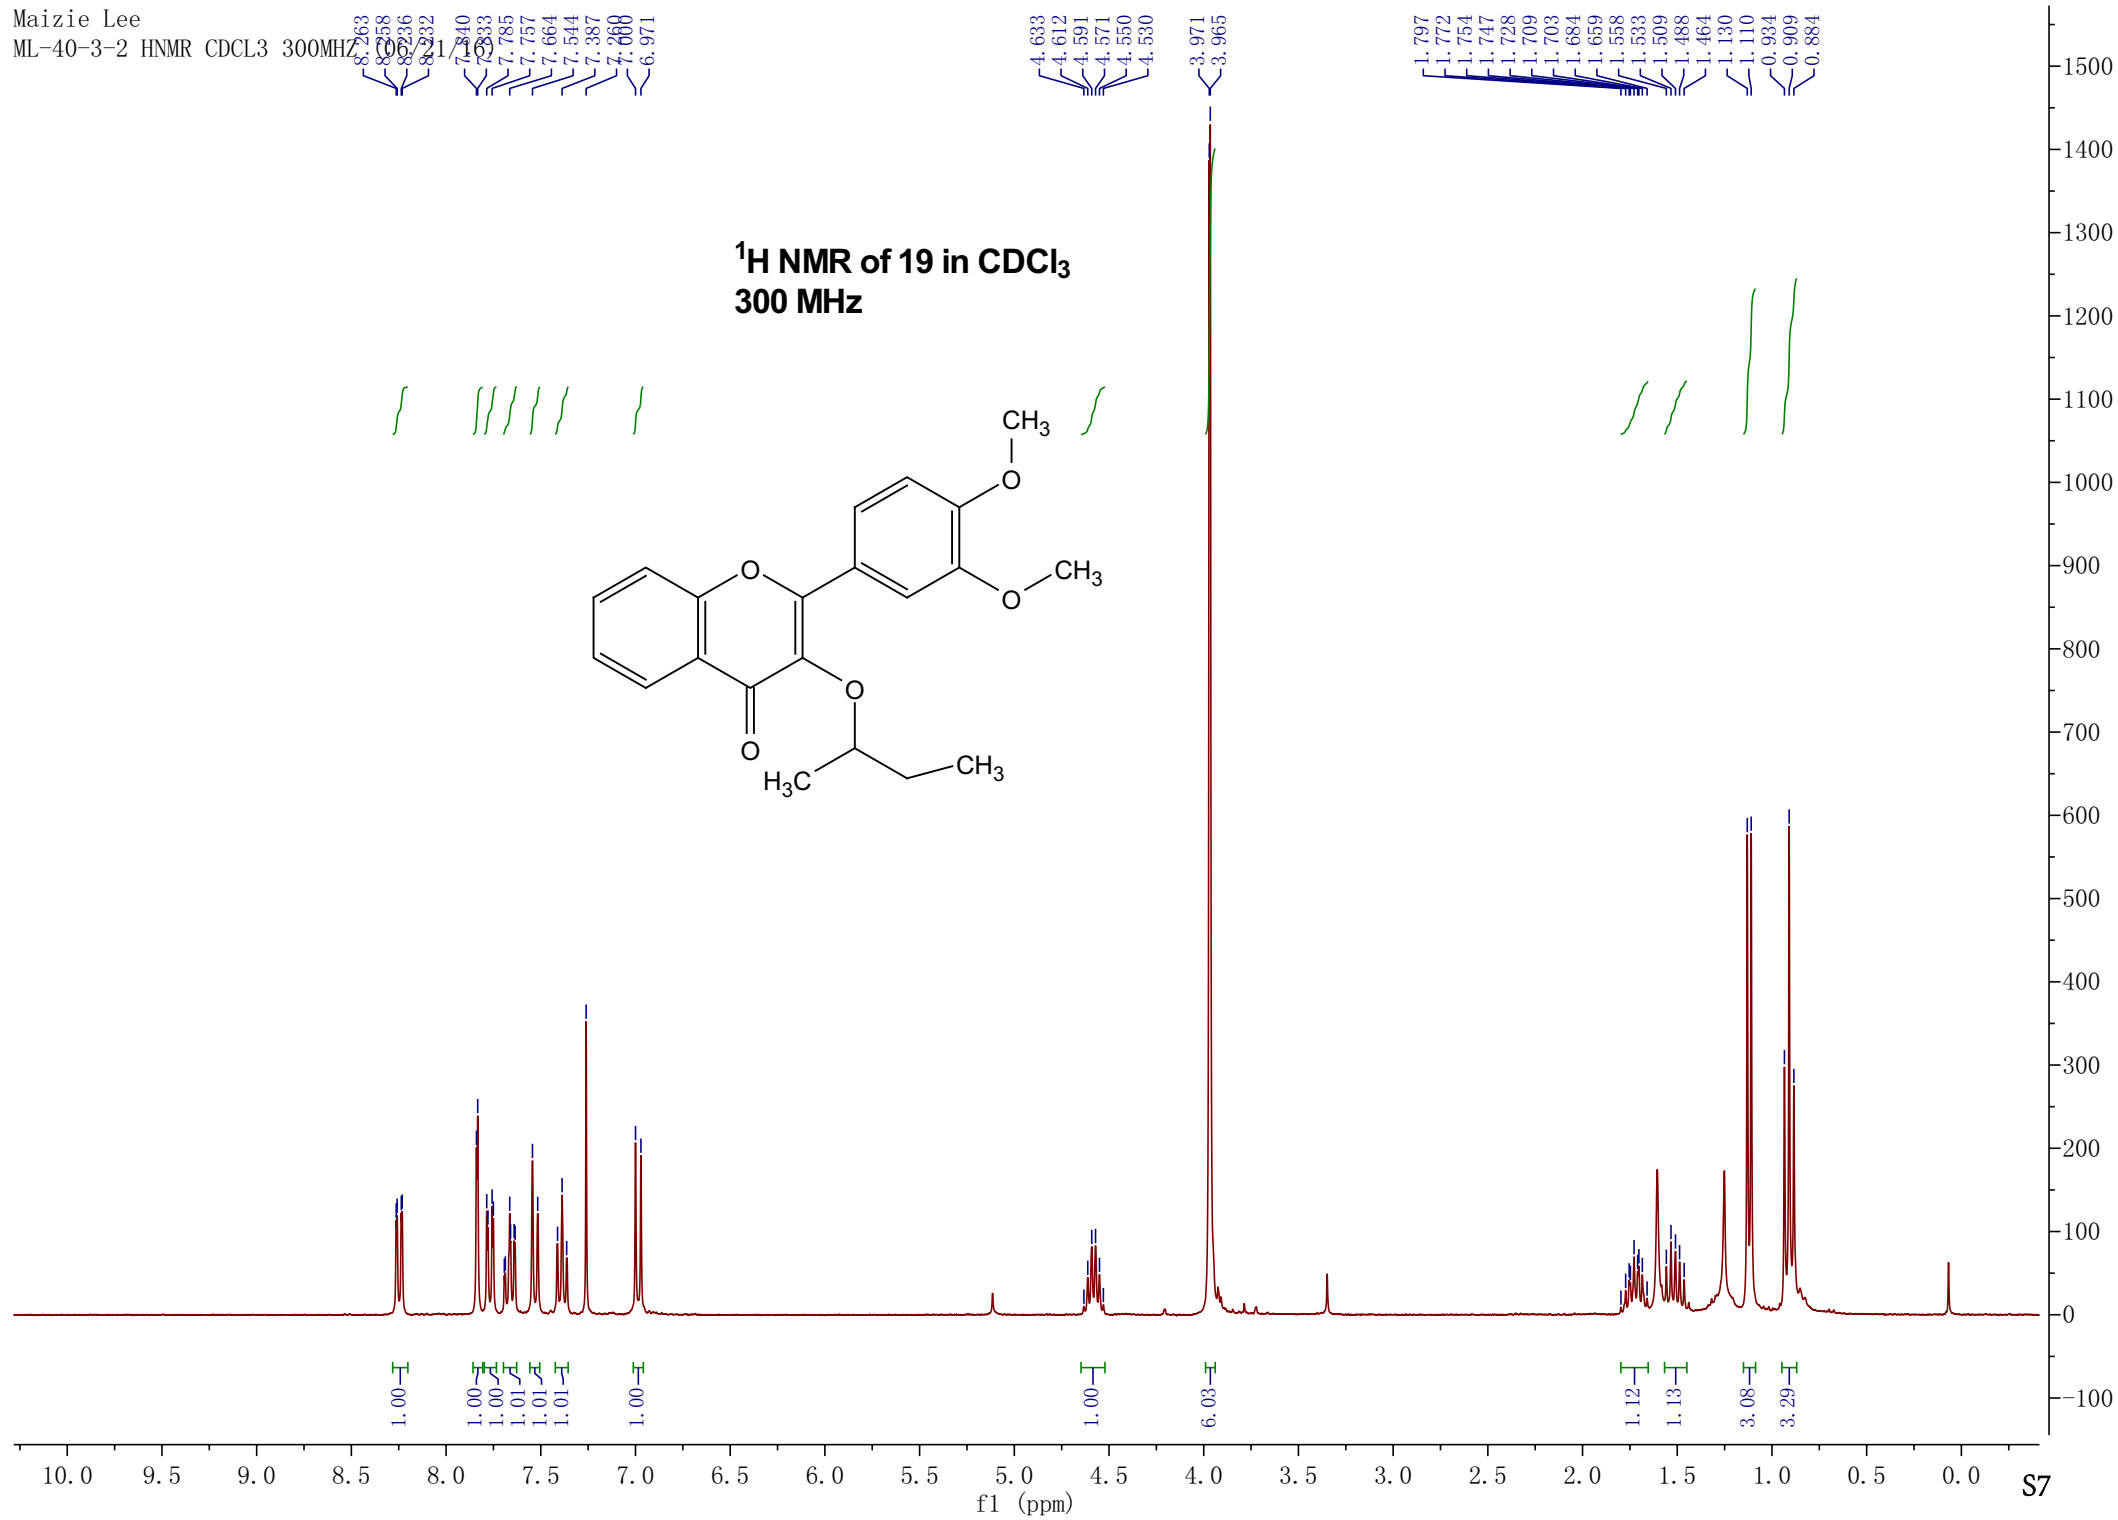

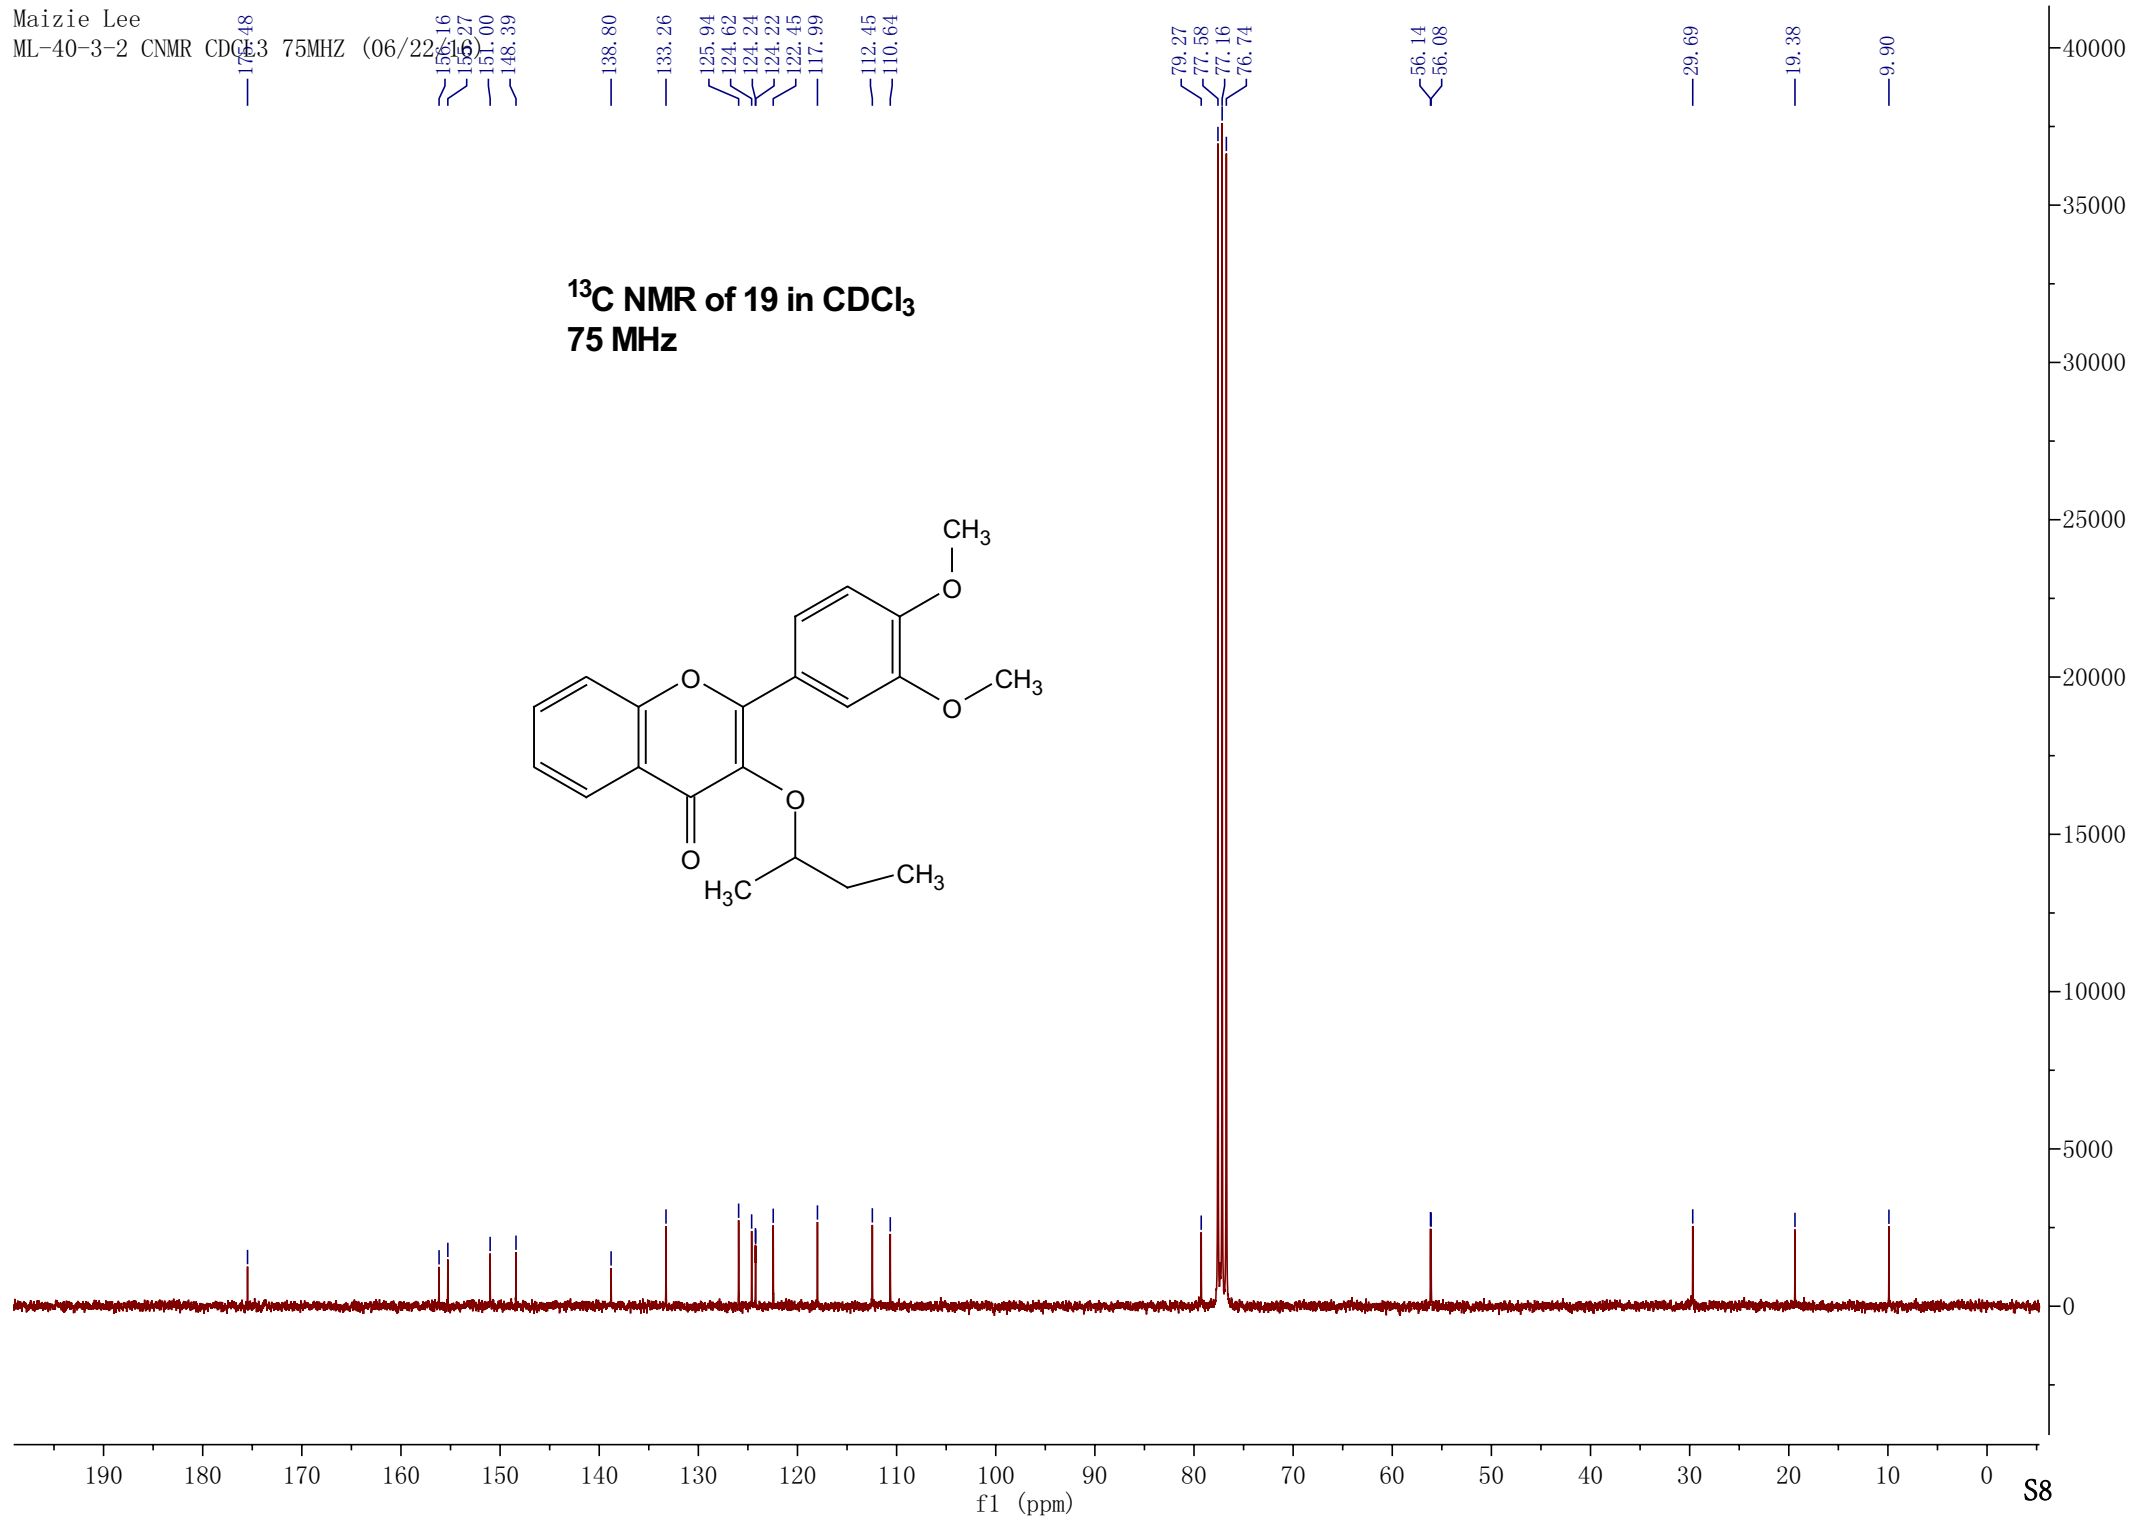



Xiang LI  
XL-35-176-2 CNMR CDCL3 75MHZ (11)

**<sup>13</sup>C NMR of 20 in CDCl<sub>3</sub>  
75 MHz**

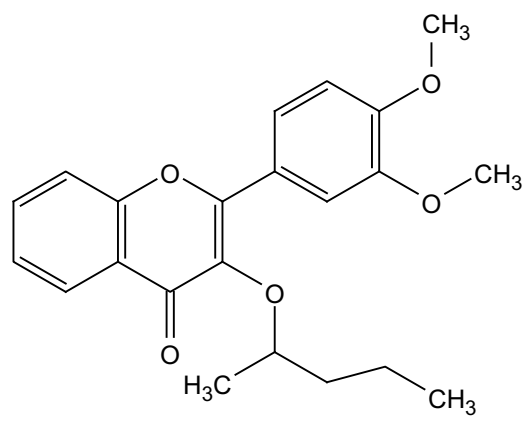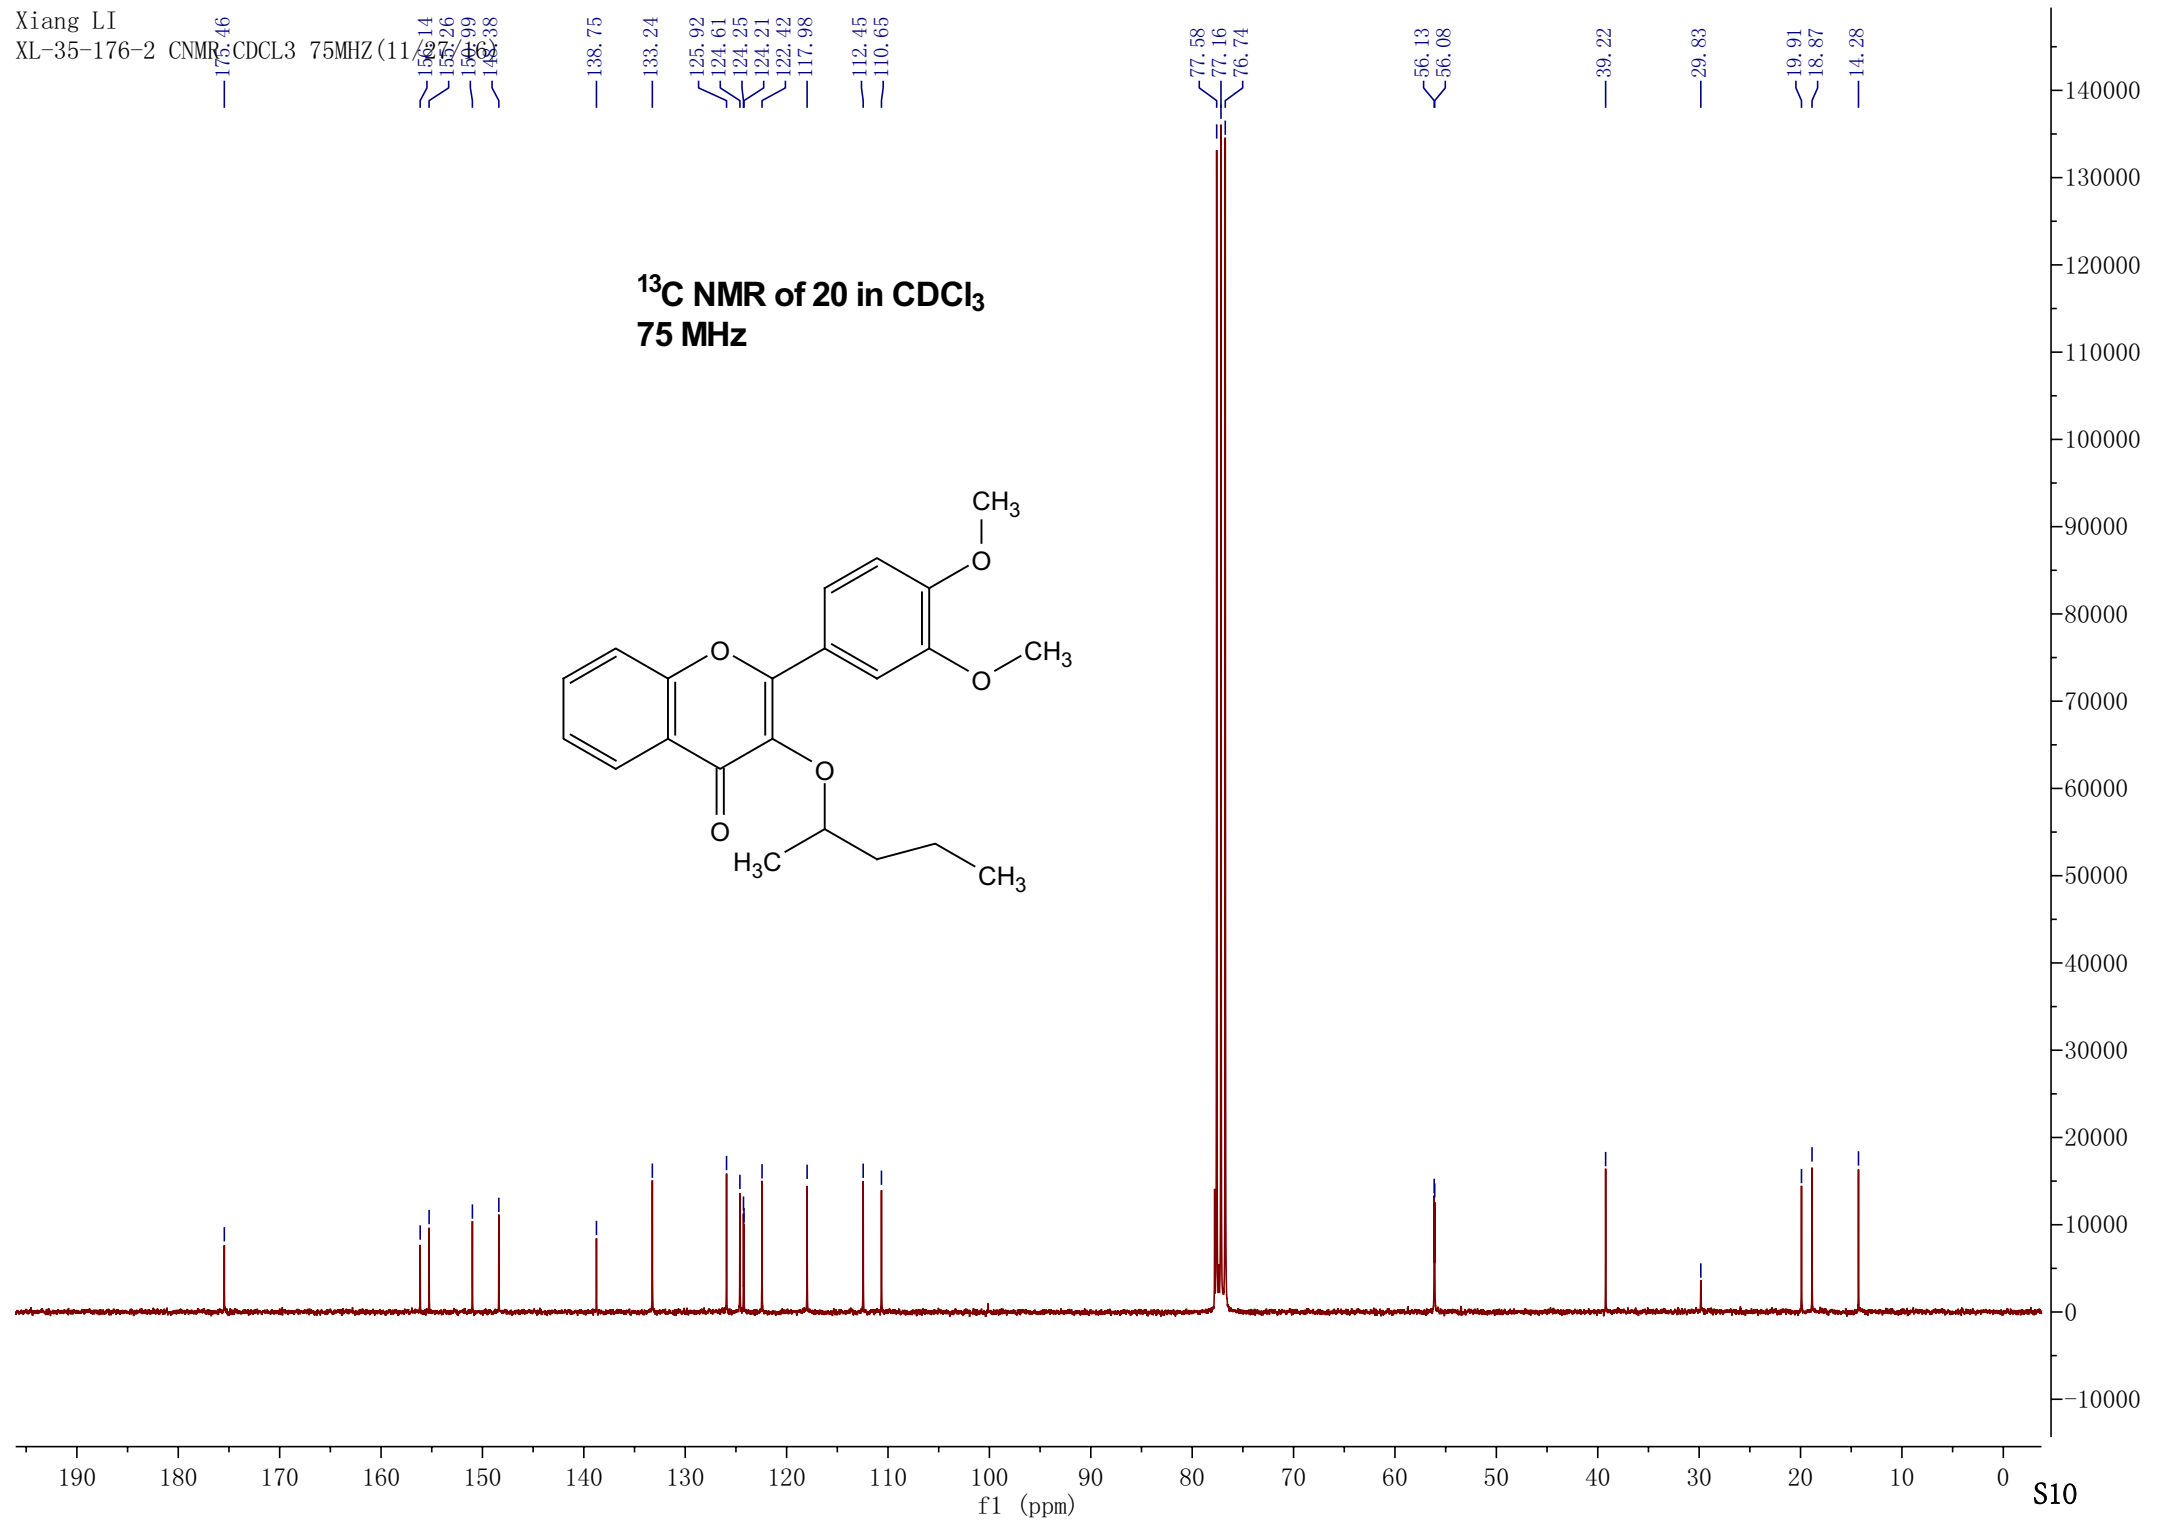

300MHZ  
7.14  
7.11  
7.73  
7.72  
7.70  
6.98  
6.95  
6.95  
6.92  
6.92  
6.88  
6.87

**<sup>1</sup>H NMR of 21 in CDCl<sub>3</sub>  
300 MHz**

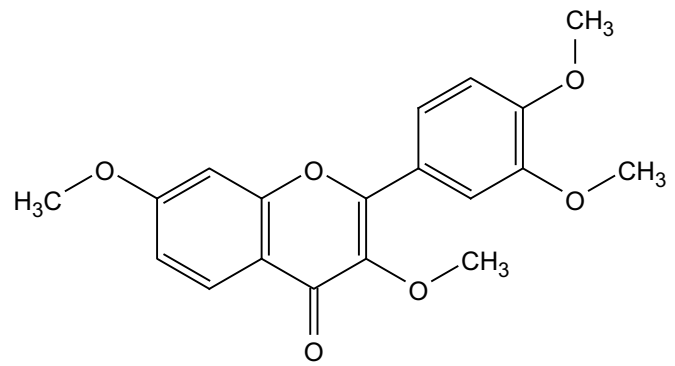

3.95  
3.90  
3.86

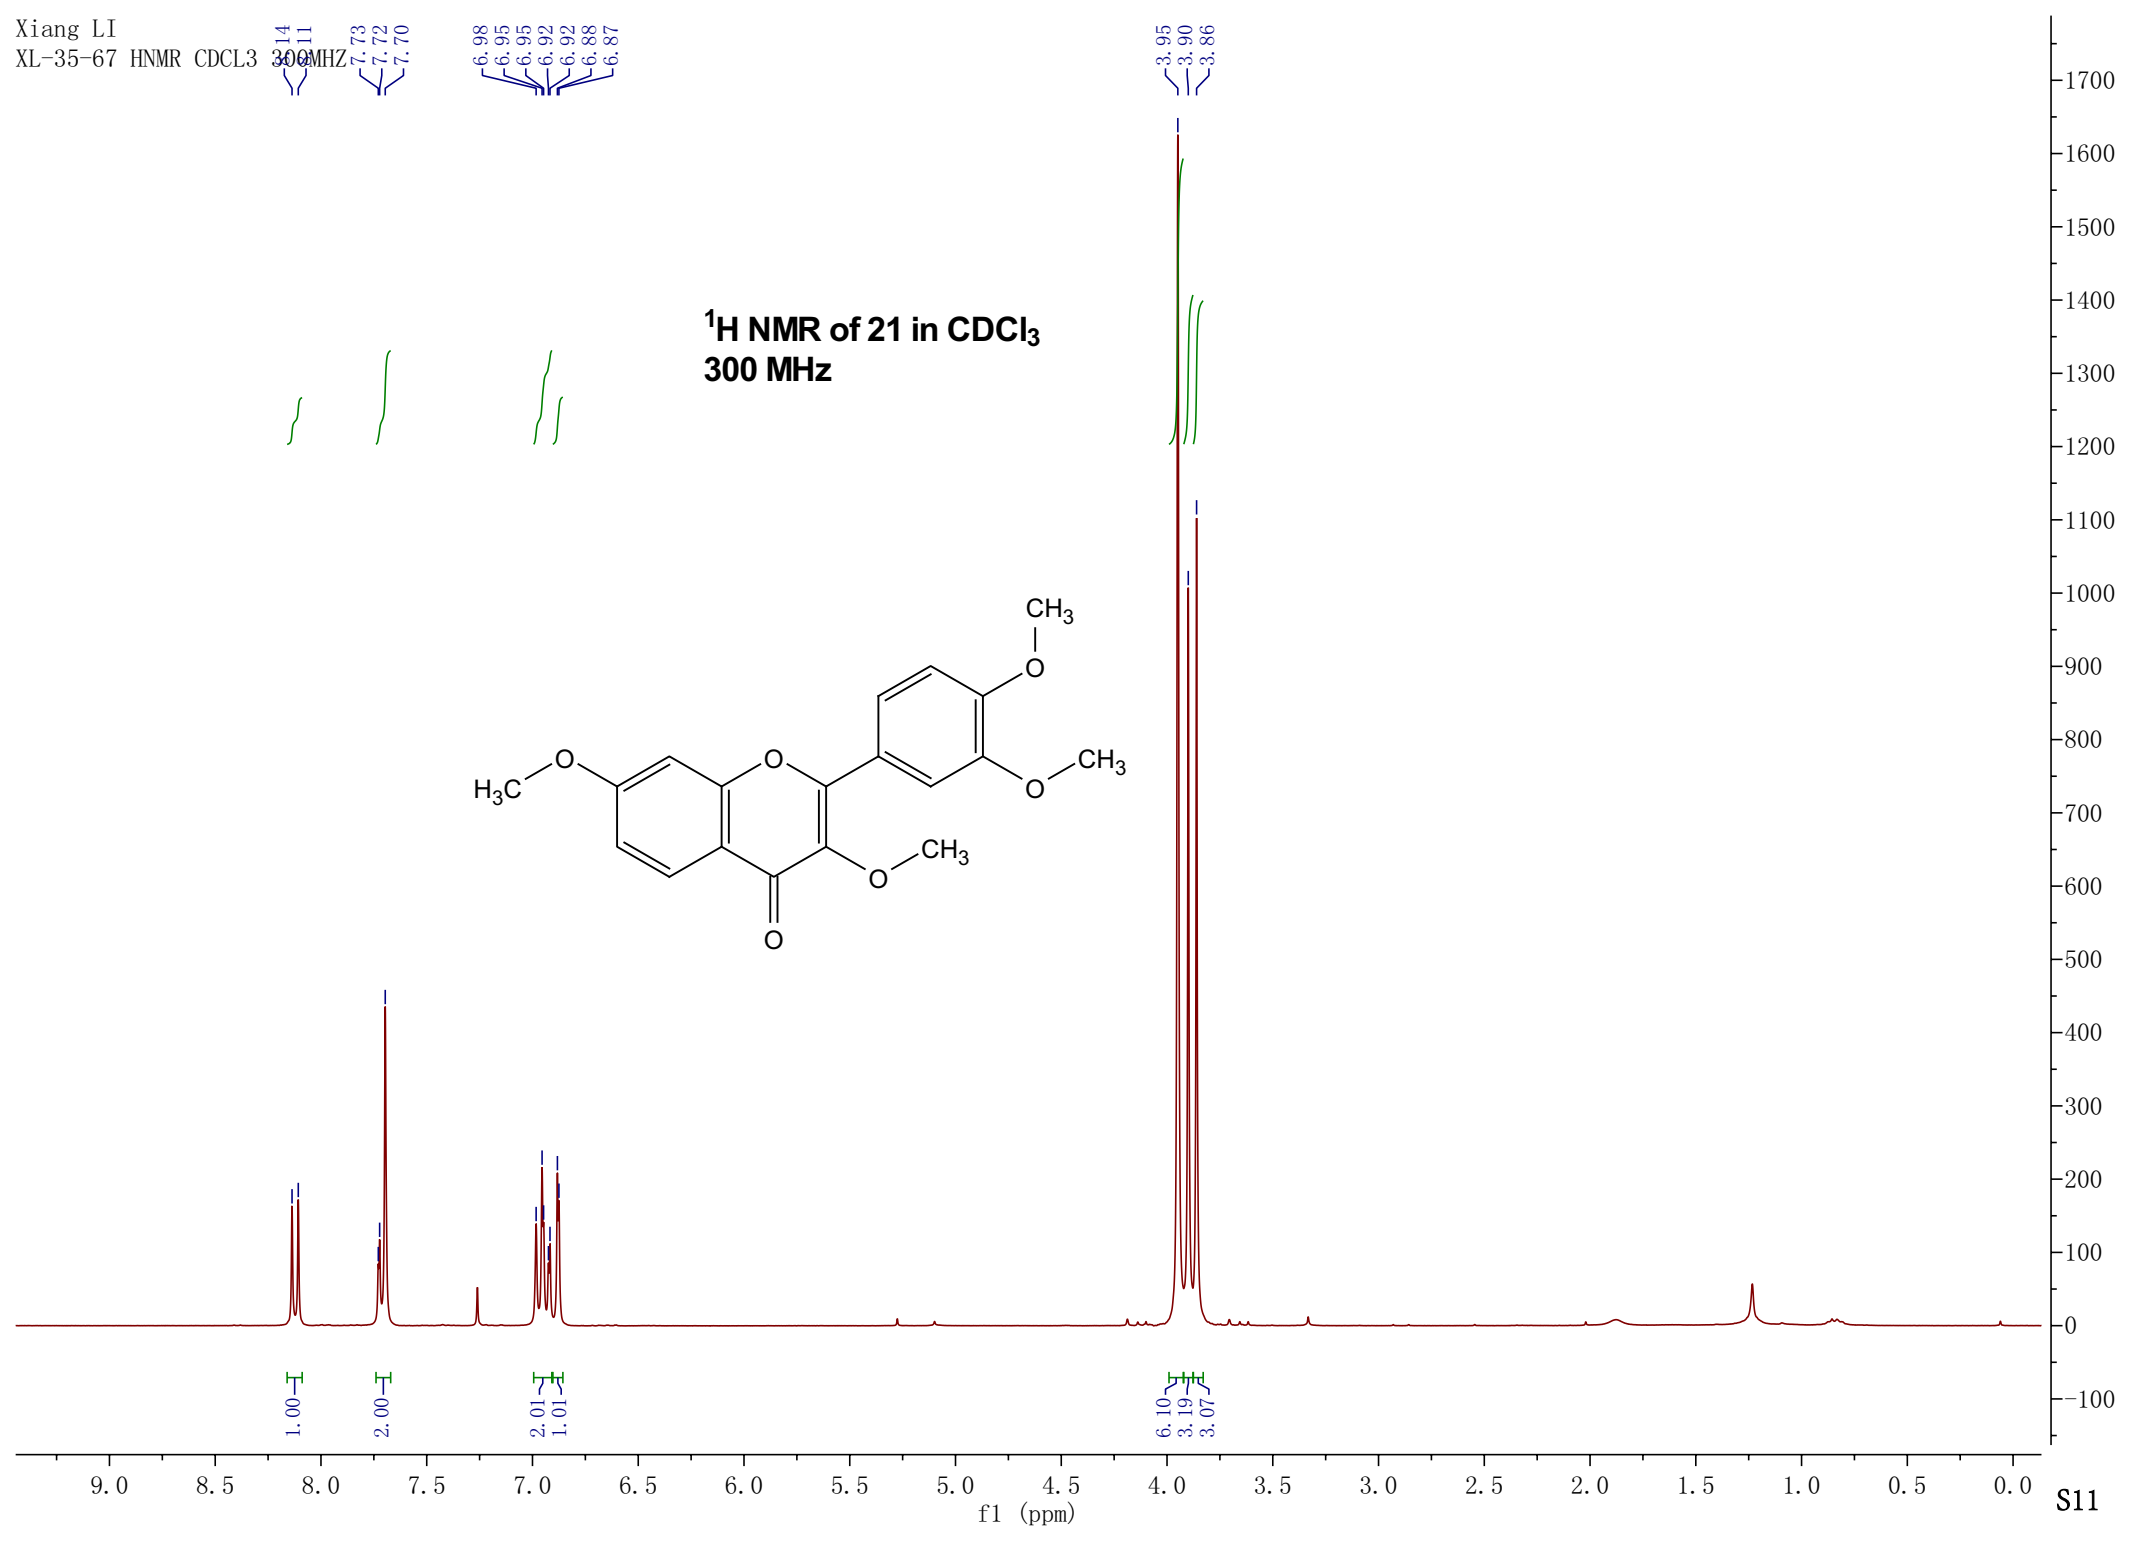

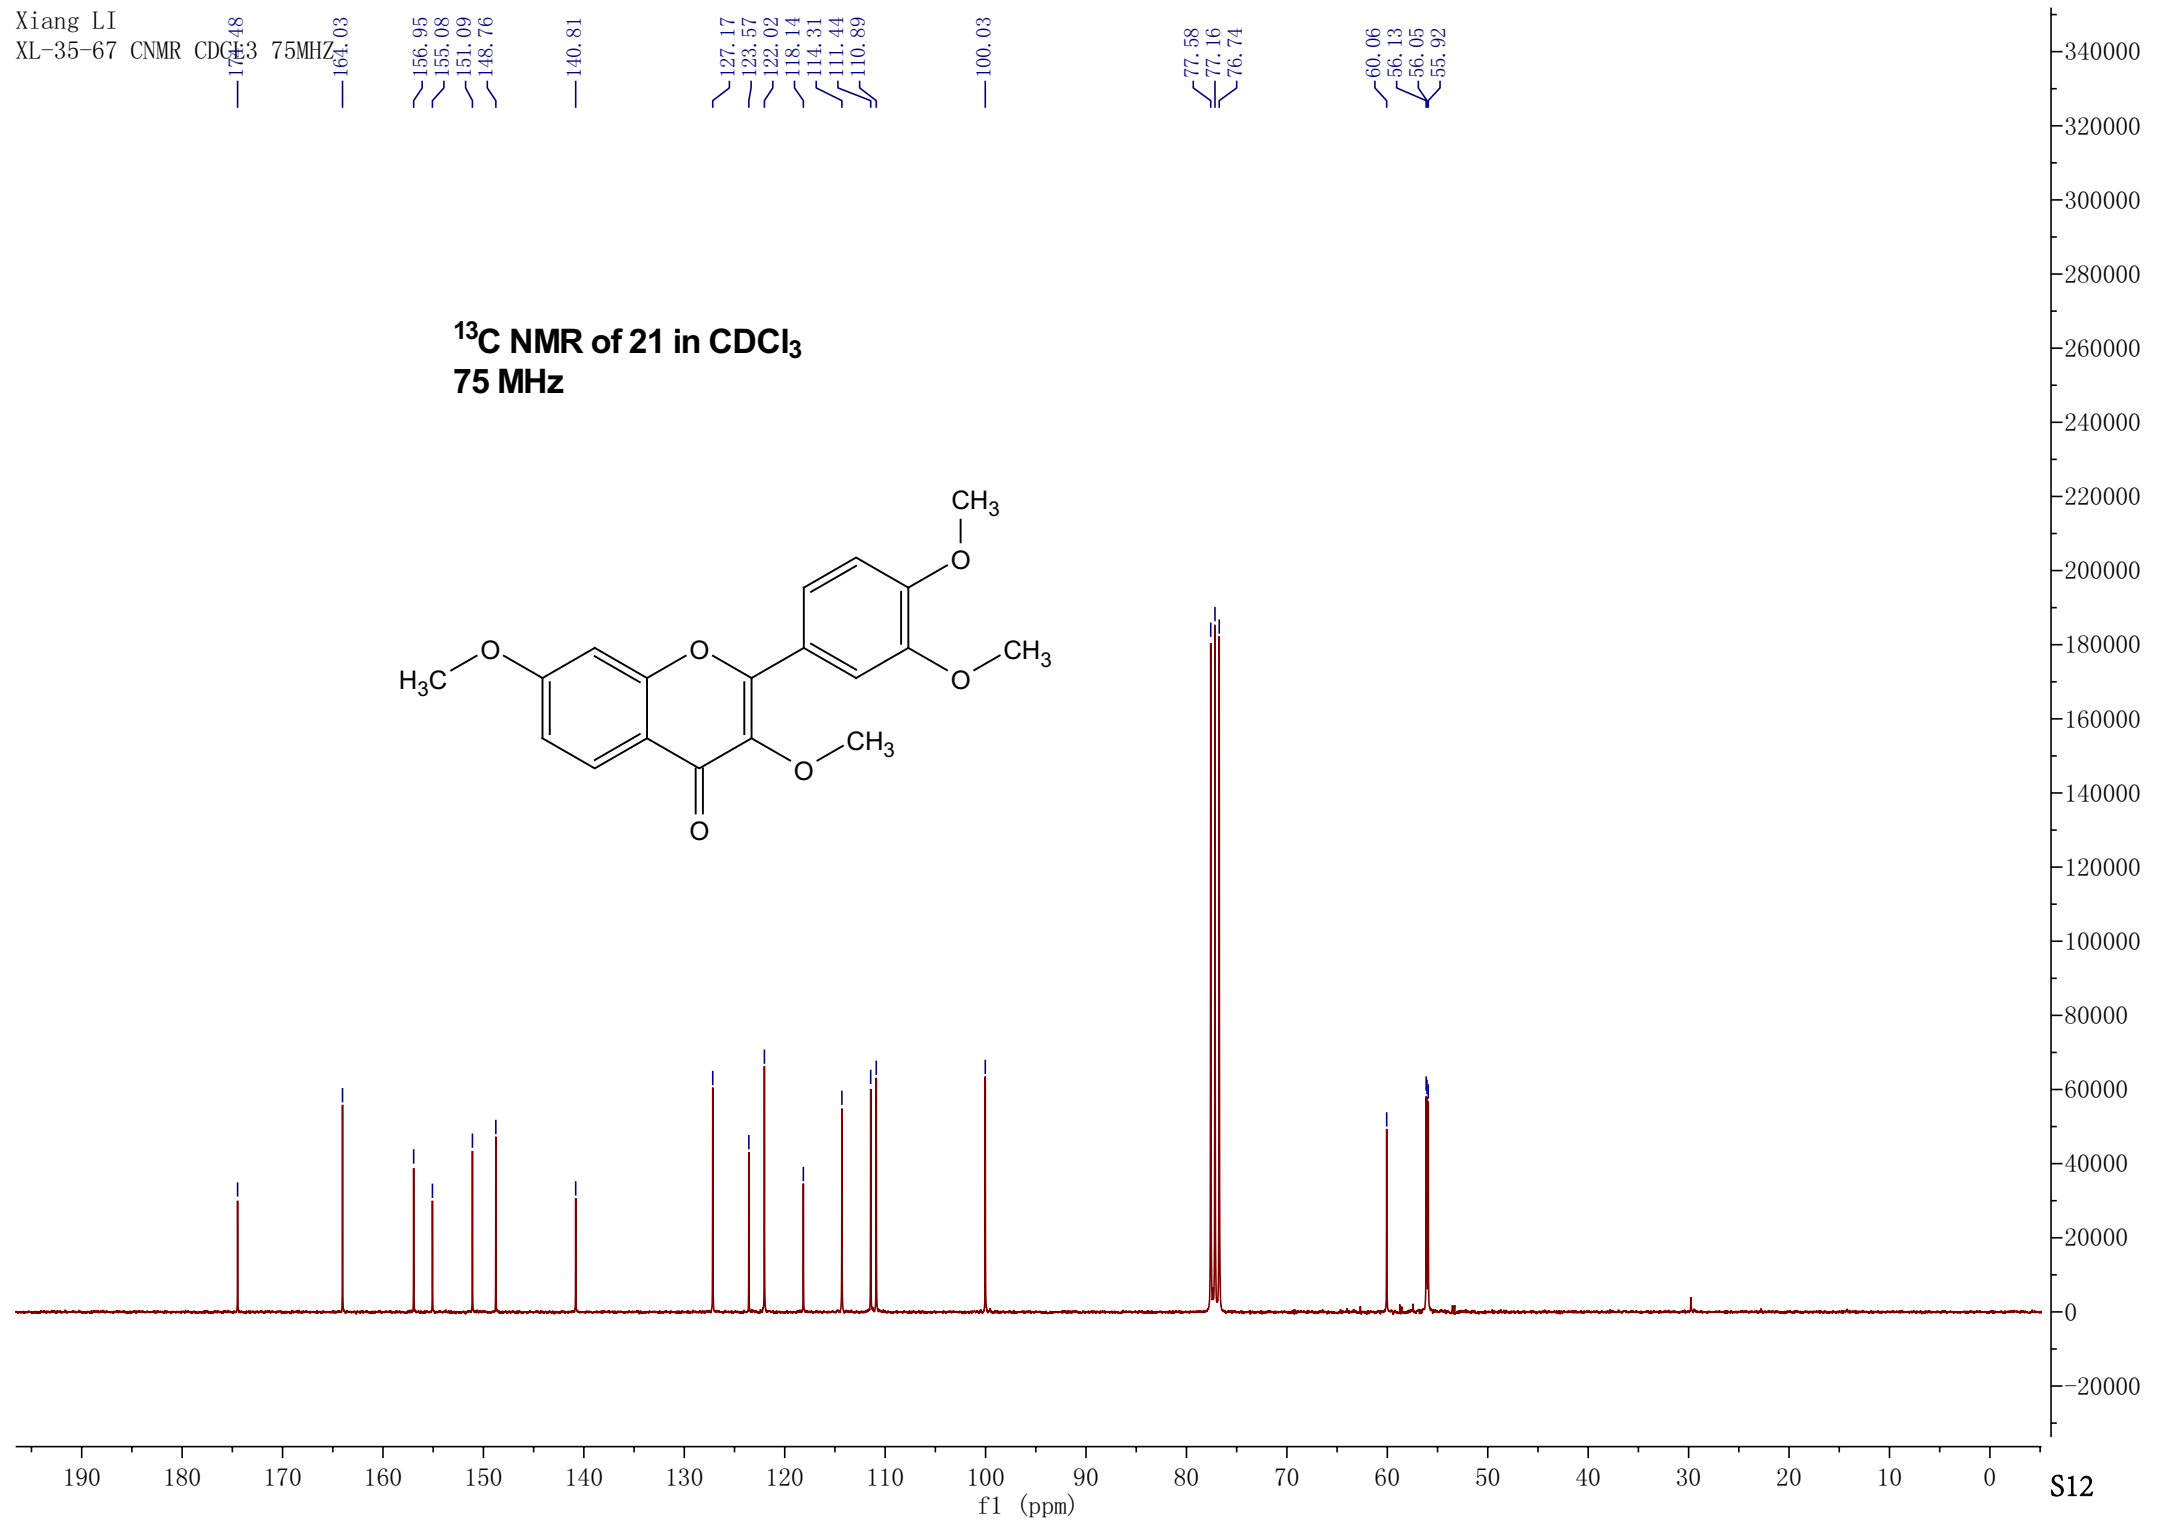



Xiang LI  
XL-35-68 HNMR CDCL3 300MHz

7.13  
7.10  
7.76  
7.73  
7.70  
7.26  
6.97  
6.94  
6.91  
6.87

4.13  
4.10  
4.08  
4.06  
3.94  
3.89

1.34  
1.32  
1.30

**<sup>1</sup>H NMR of 22 in CDCl<sub>3</sub>  
300 MHz**

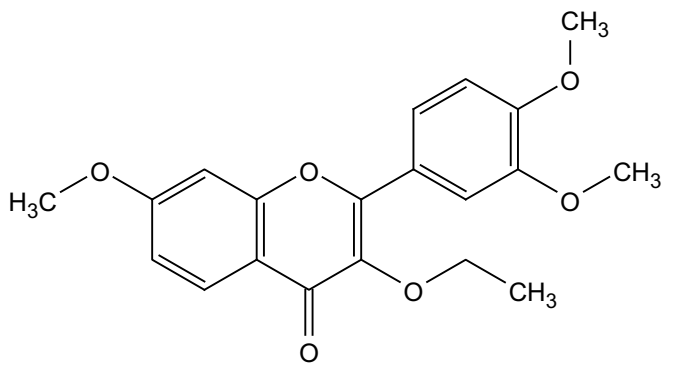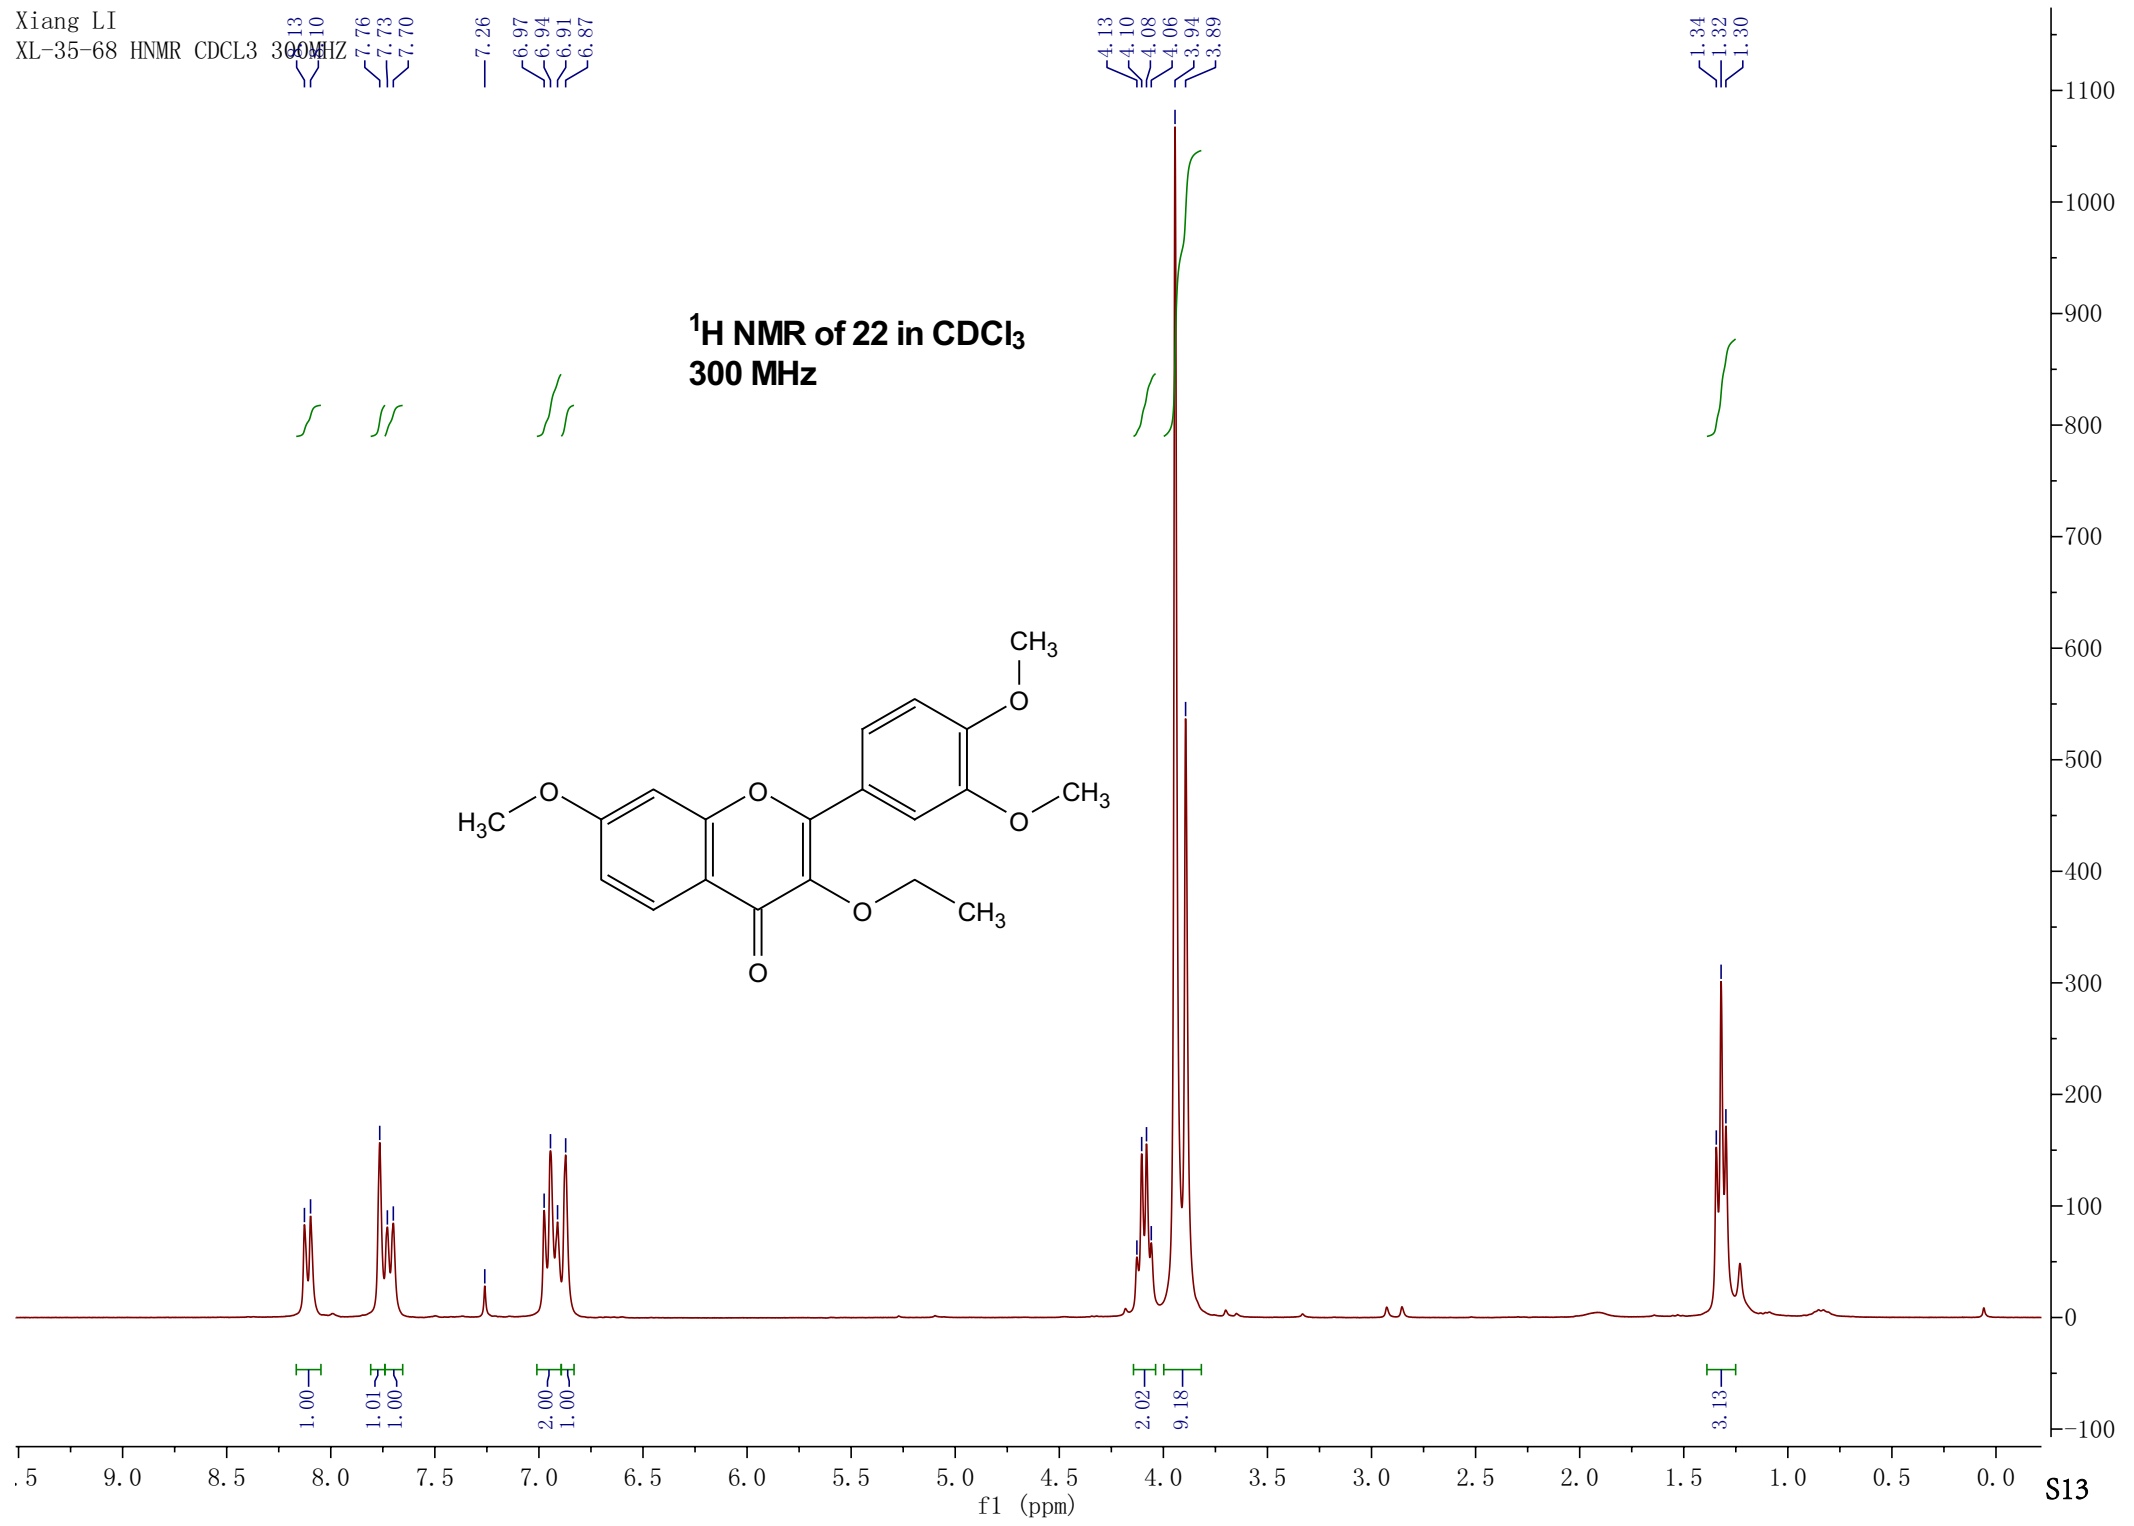

Xiang LI  
XL-35-68 CNMR CDCL3 75MHZ

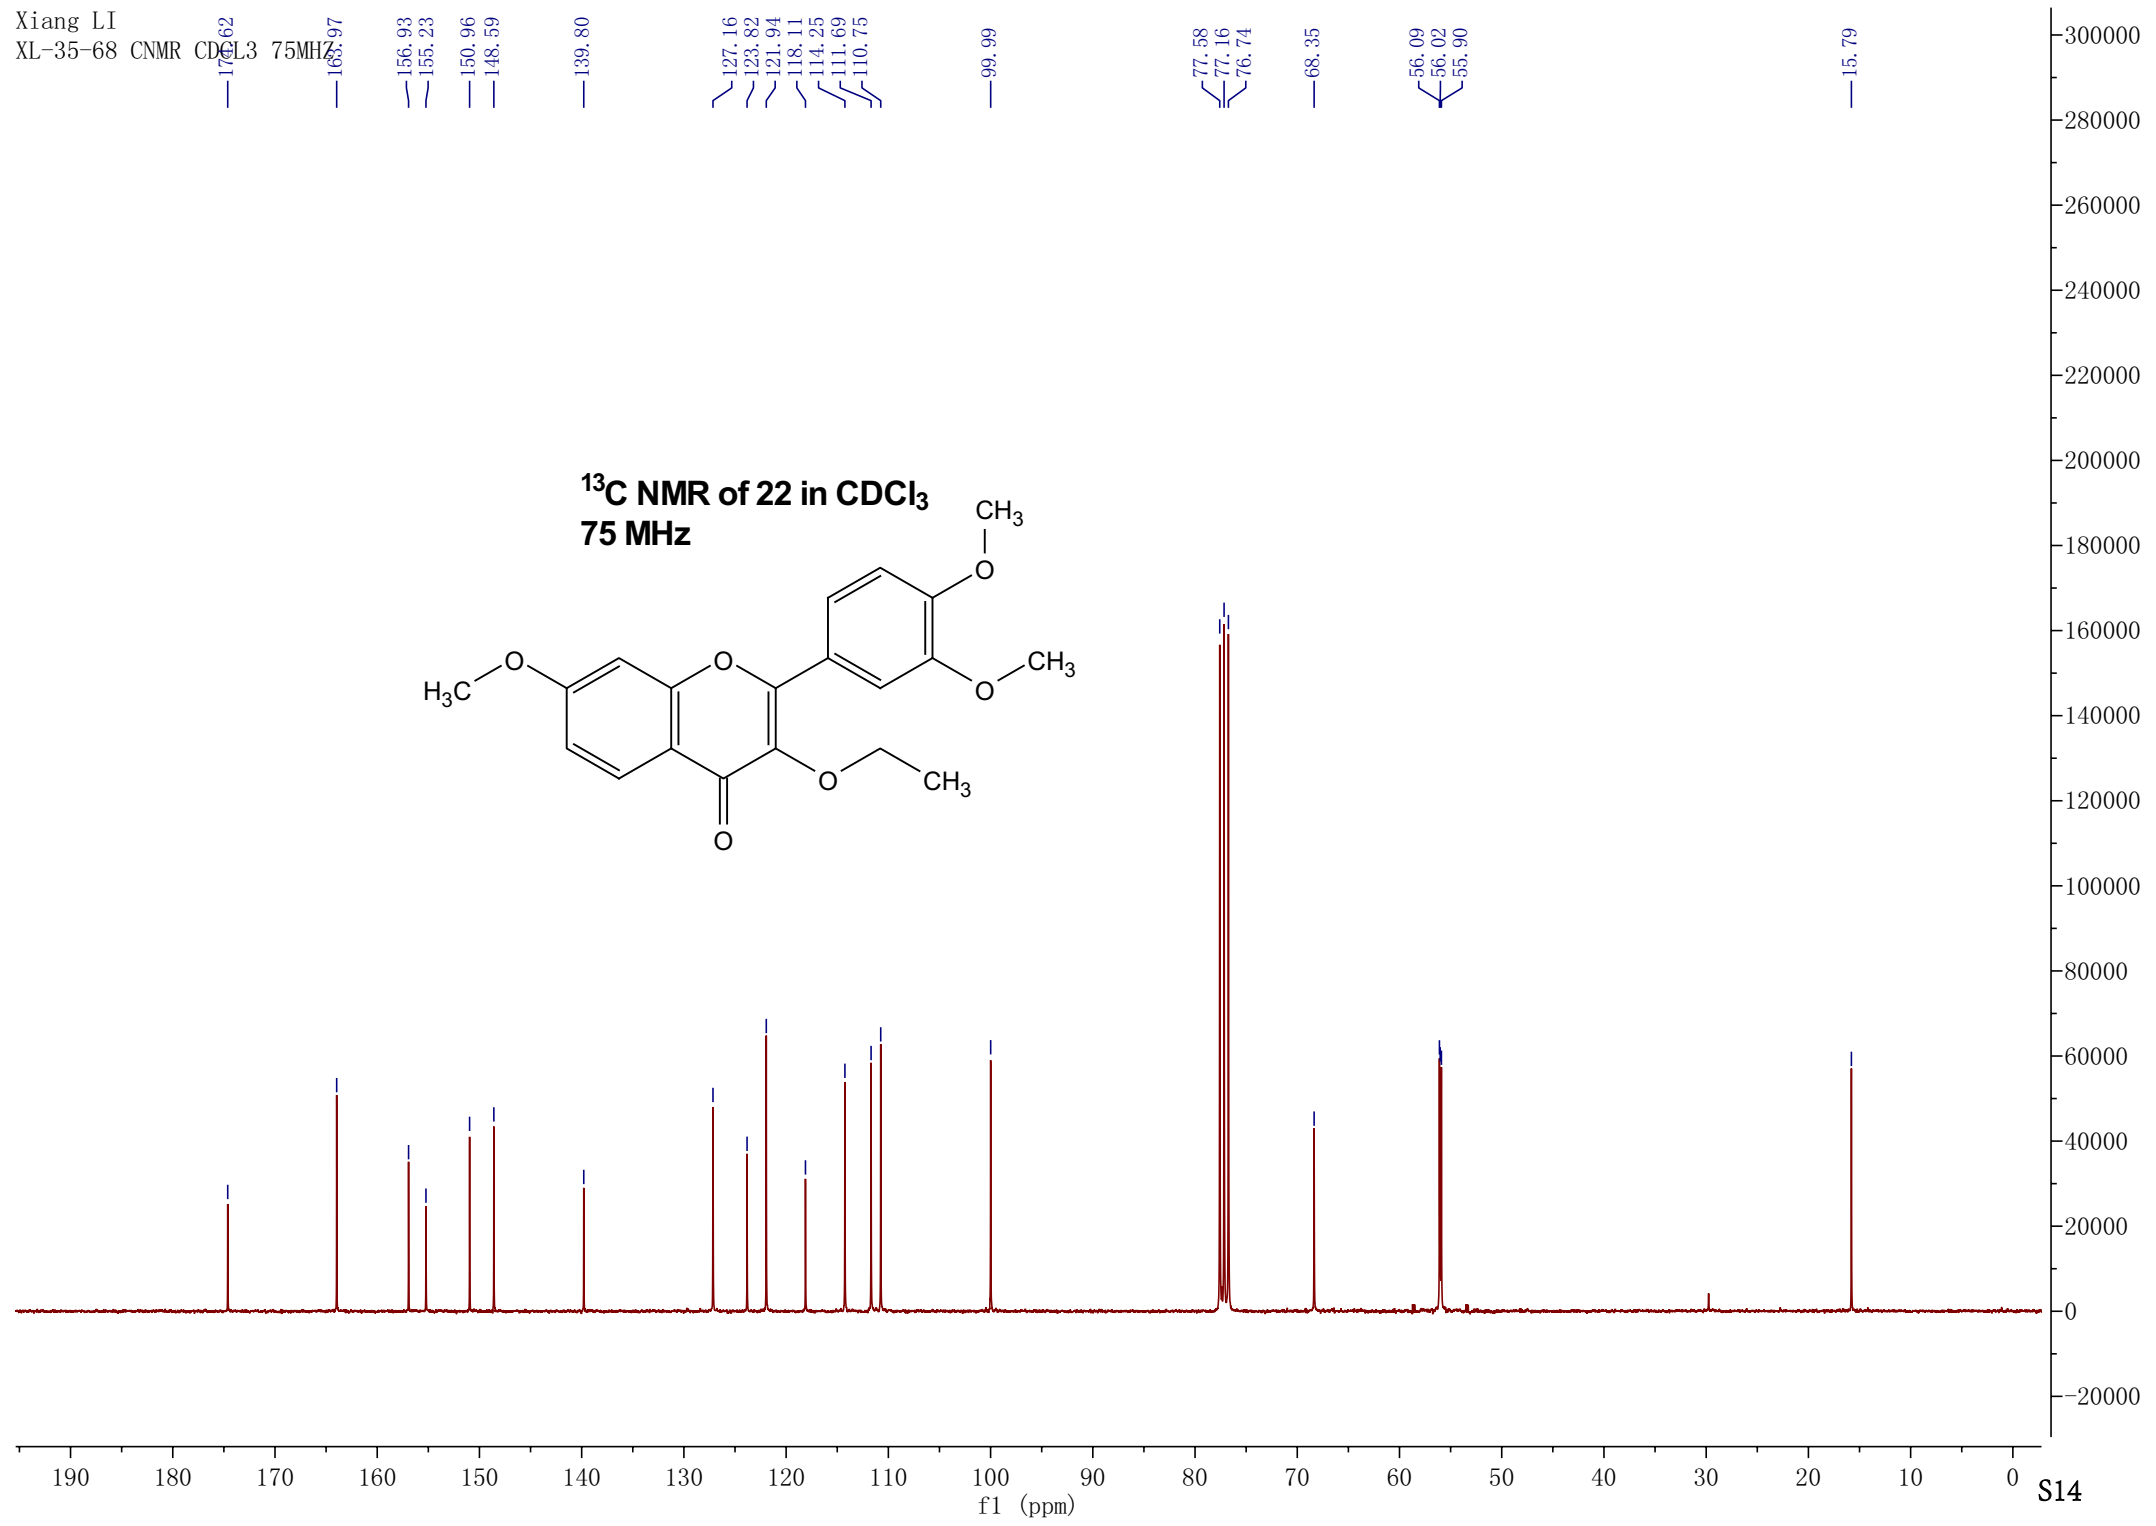

8.223  
8.094  
7.729  
7.723  
7.716  
7.688  
7.681

7.260  
6.971  
6.943  
6.937  
6.914  
6.907  
6.873  
6.865

3.992  
3.969  
3.941  
3.890

1.790  
1.765  
1.742  
1.717  
1.694  
1.670

0.945  
0.920  
0.895

**<sup>1</sup>H NMR of 23 in CDCl<sub>3</sub>  
300 MHz**

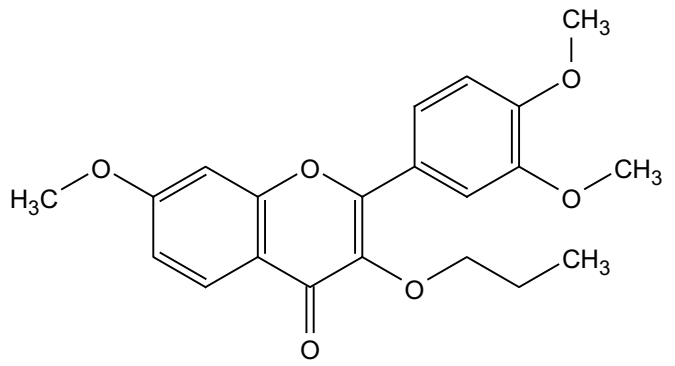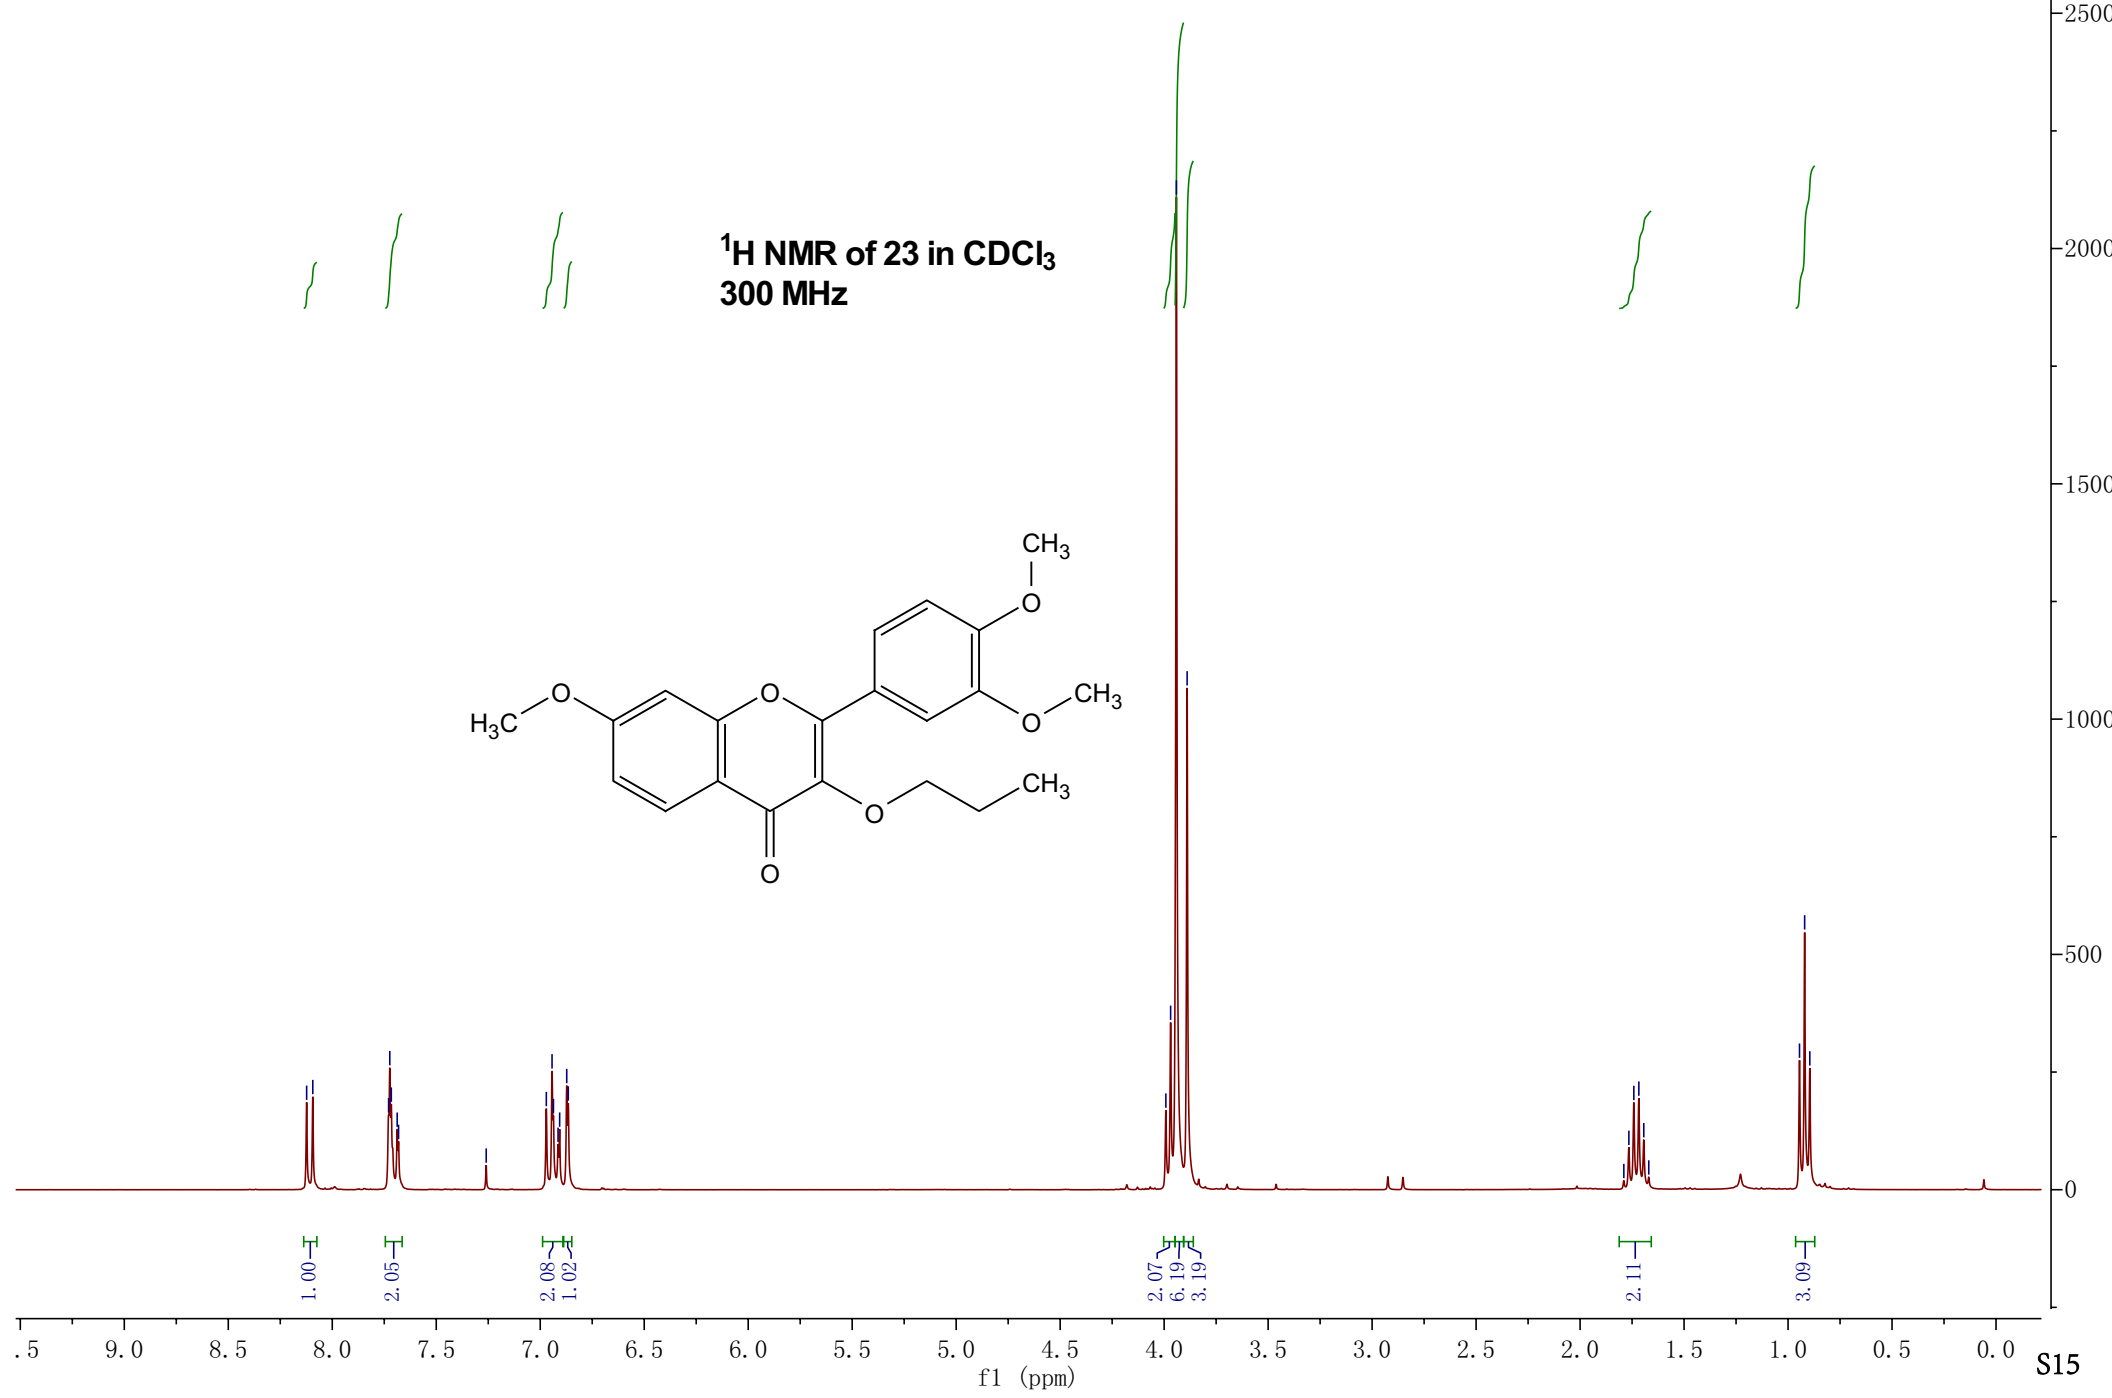

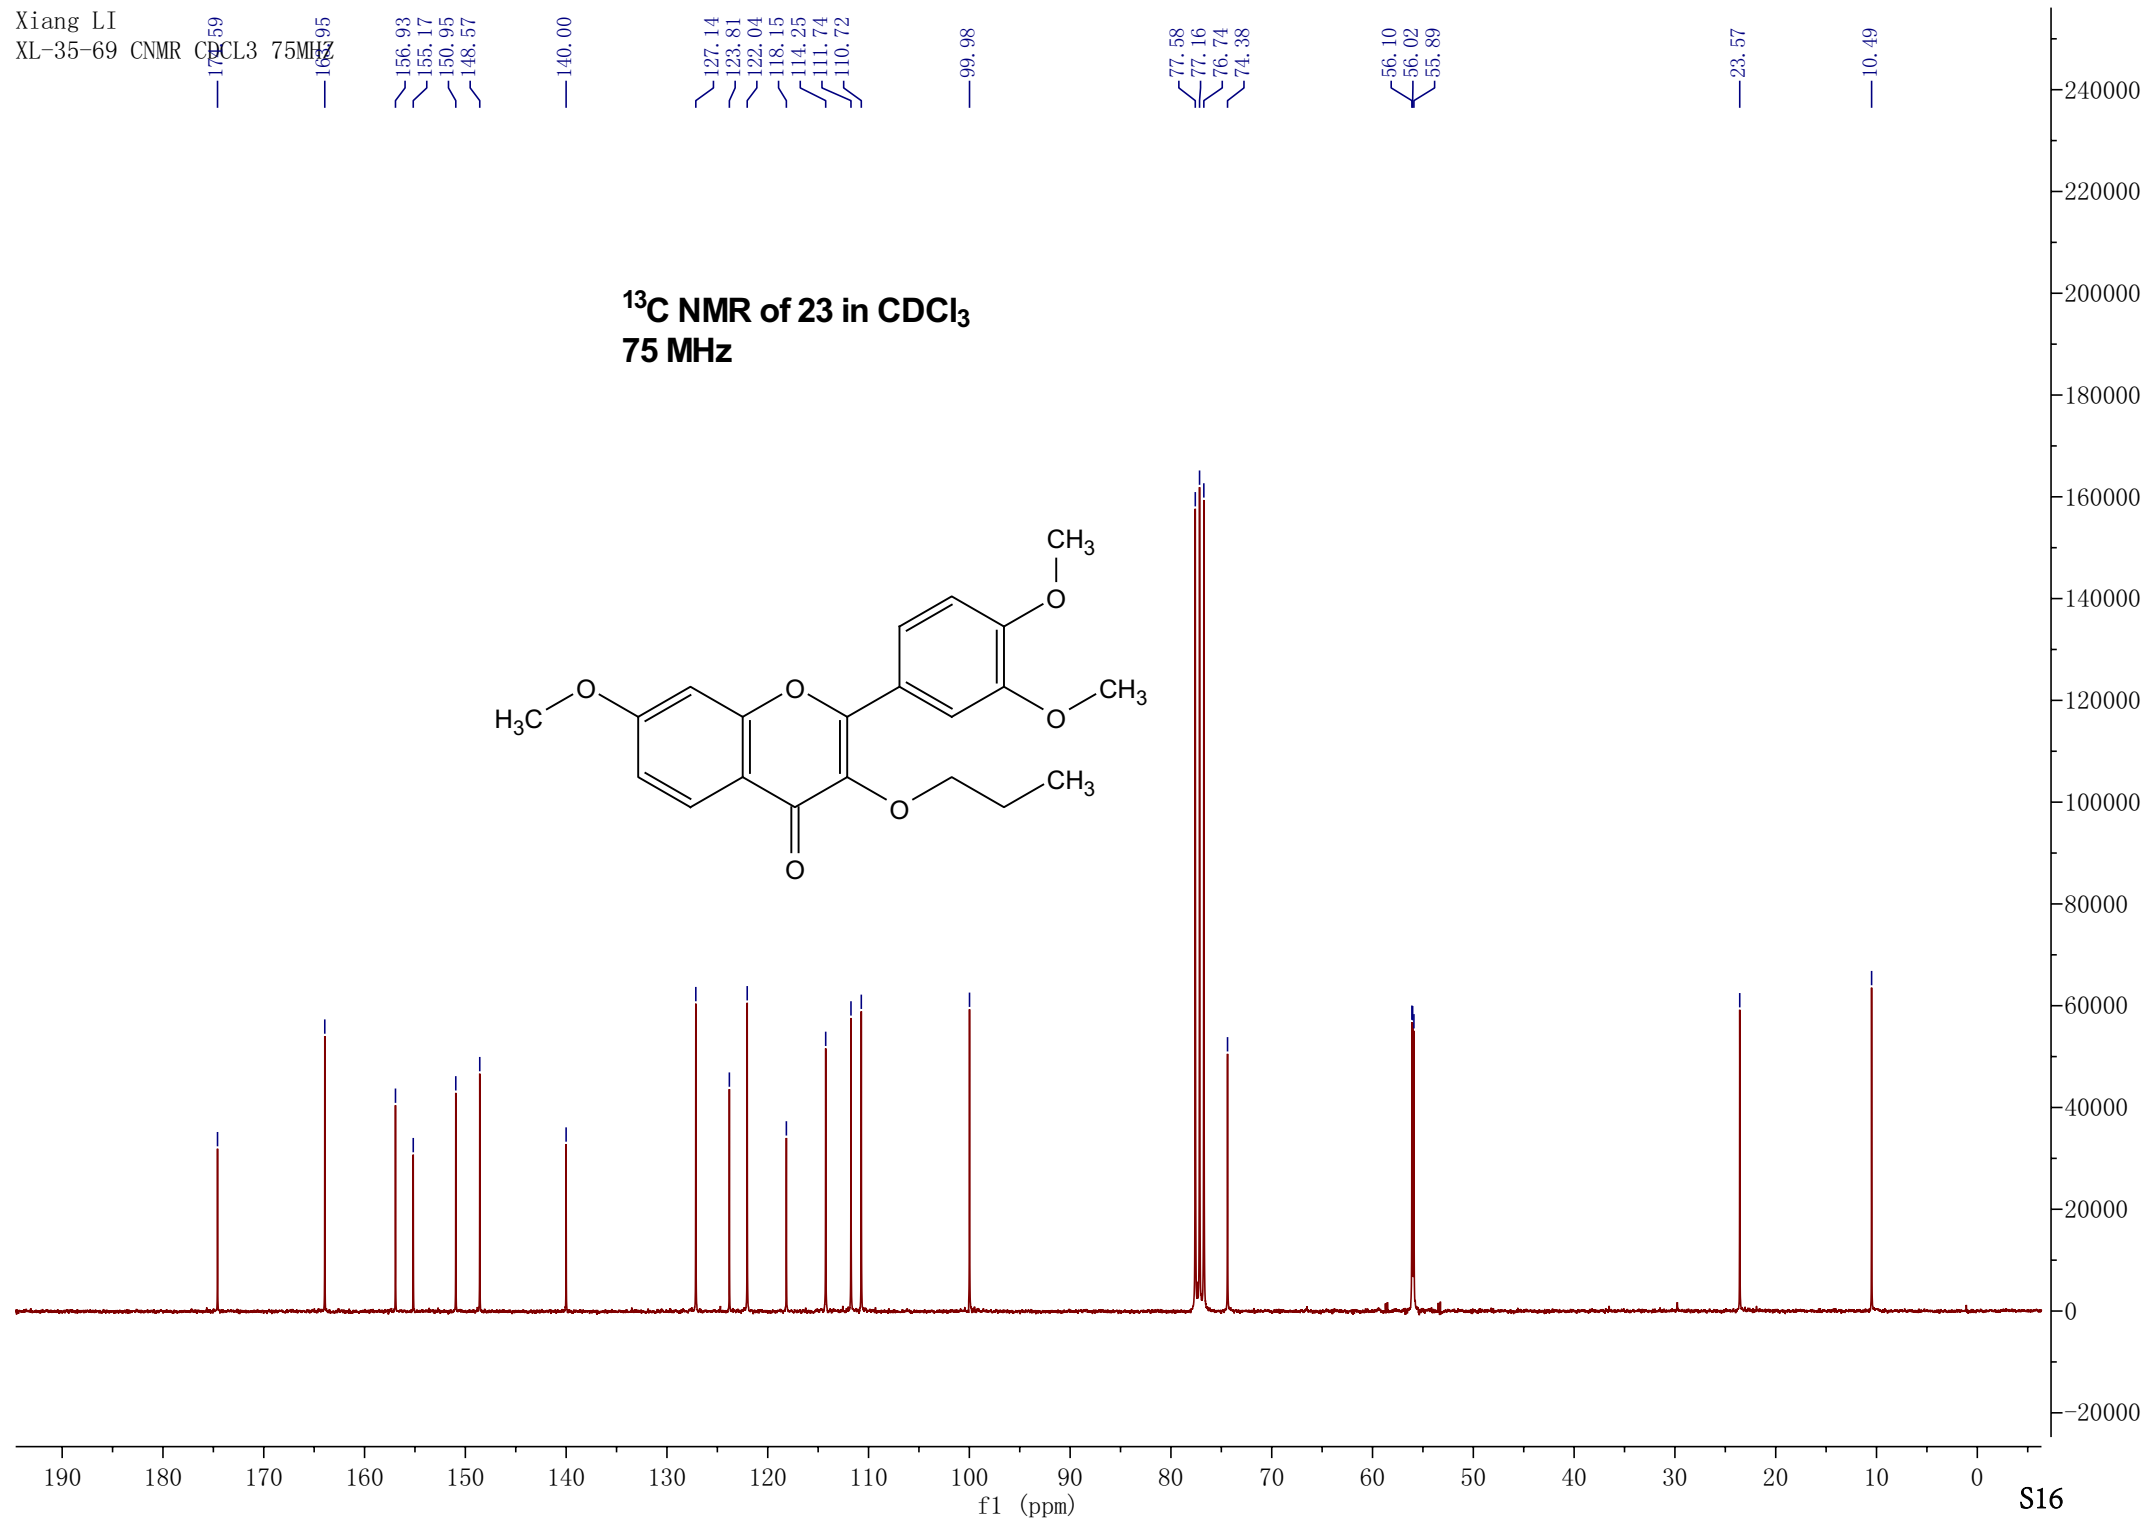

8.442  
8.113  
7.939  
7.733  
7.726  
7.698  
7.691

7.260  
6.987  
6.958  
6.934  
6.926  
6.889  
6.882

4.041  
4.018  
3.996  
3.955

1.750  
1.727  
1.704  
1.678  
1.655  
1.461  
1.436  
1.410  
1.385  
1.361  
1.337  
1.240  
0.907  
0.883  
0.858

**<sup>1</sup>H NMR of 24 in CDCl<sub>3</sub>  
300 MHz**

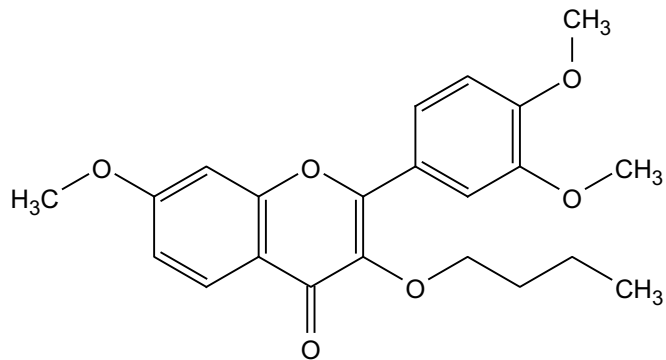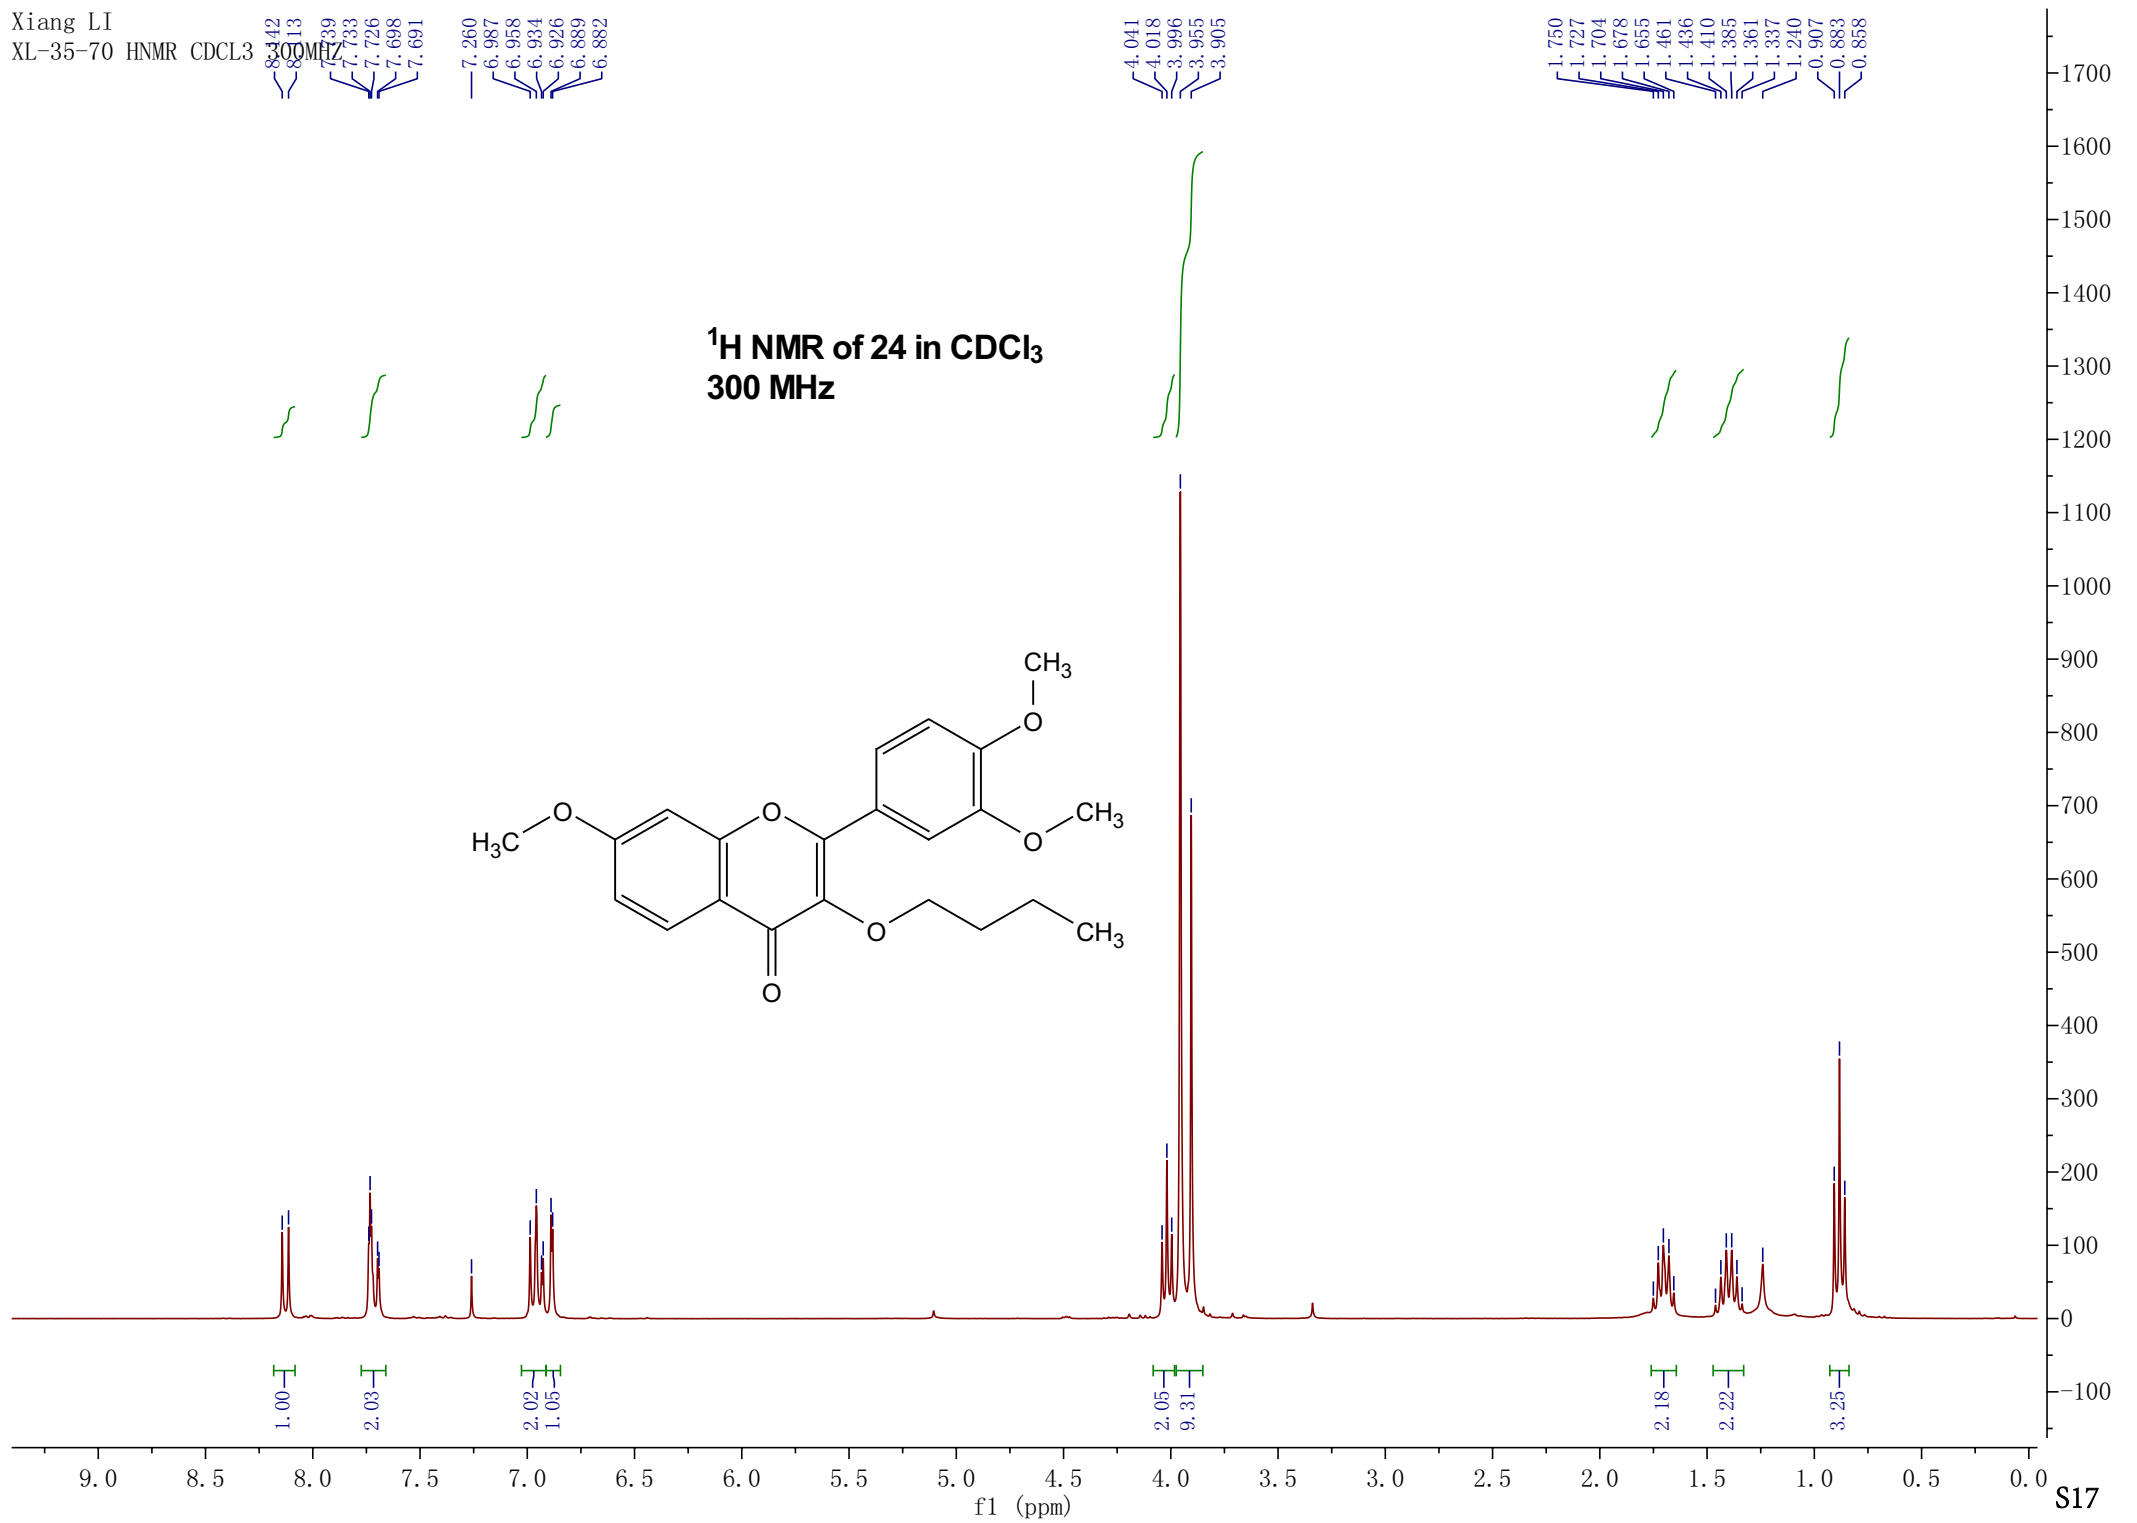

Xiang LI  
XL-35-70

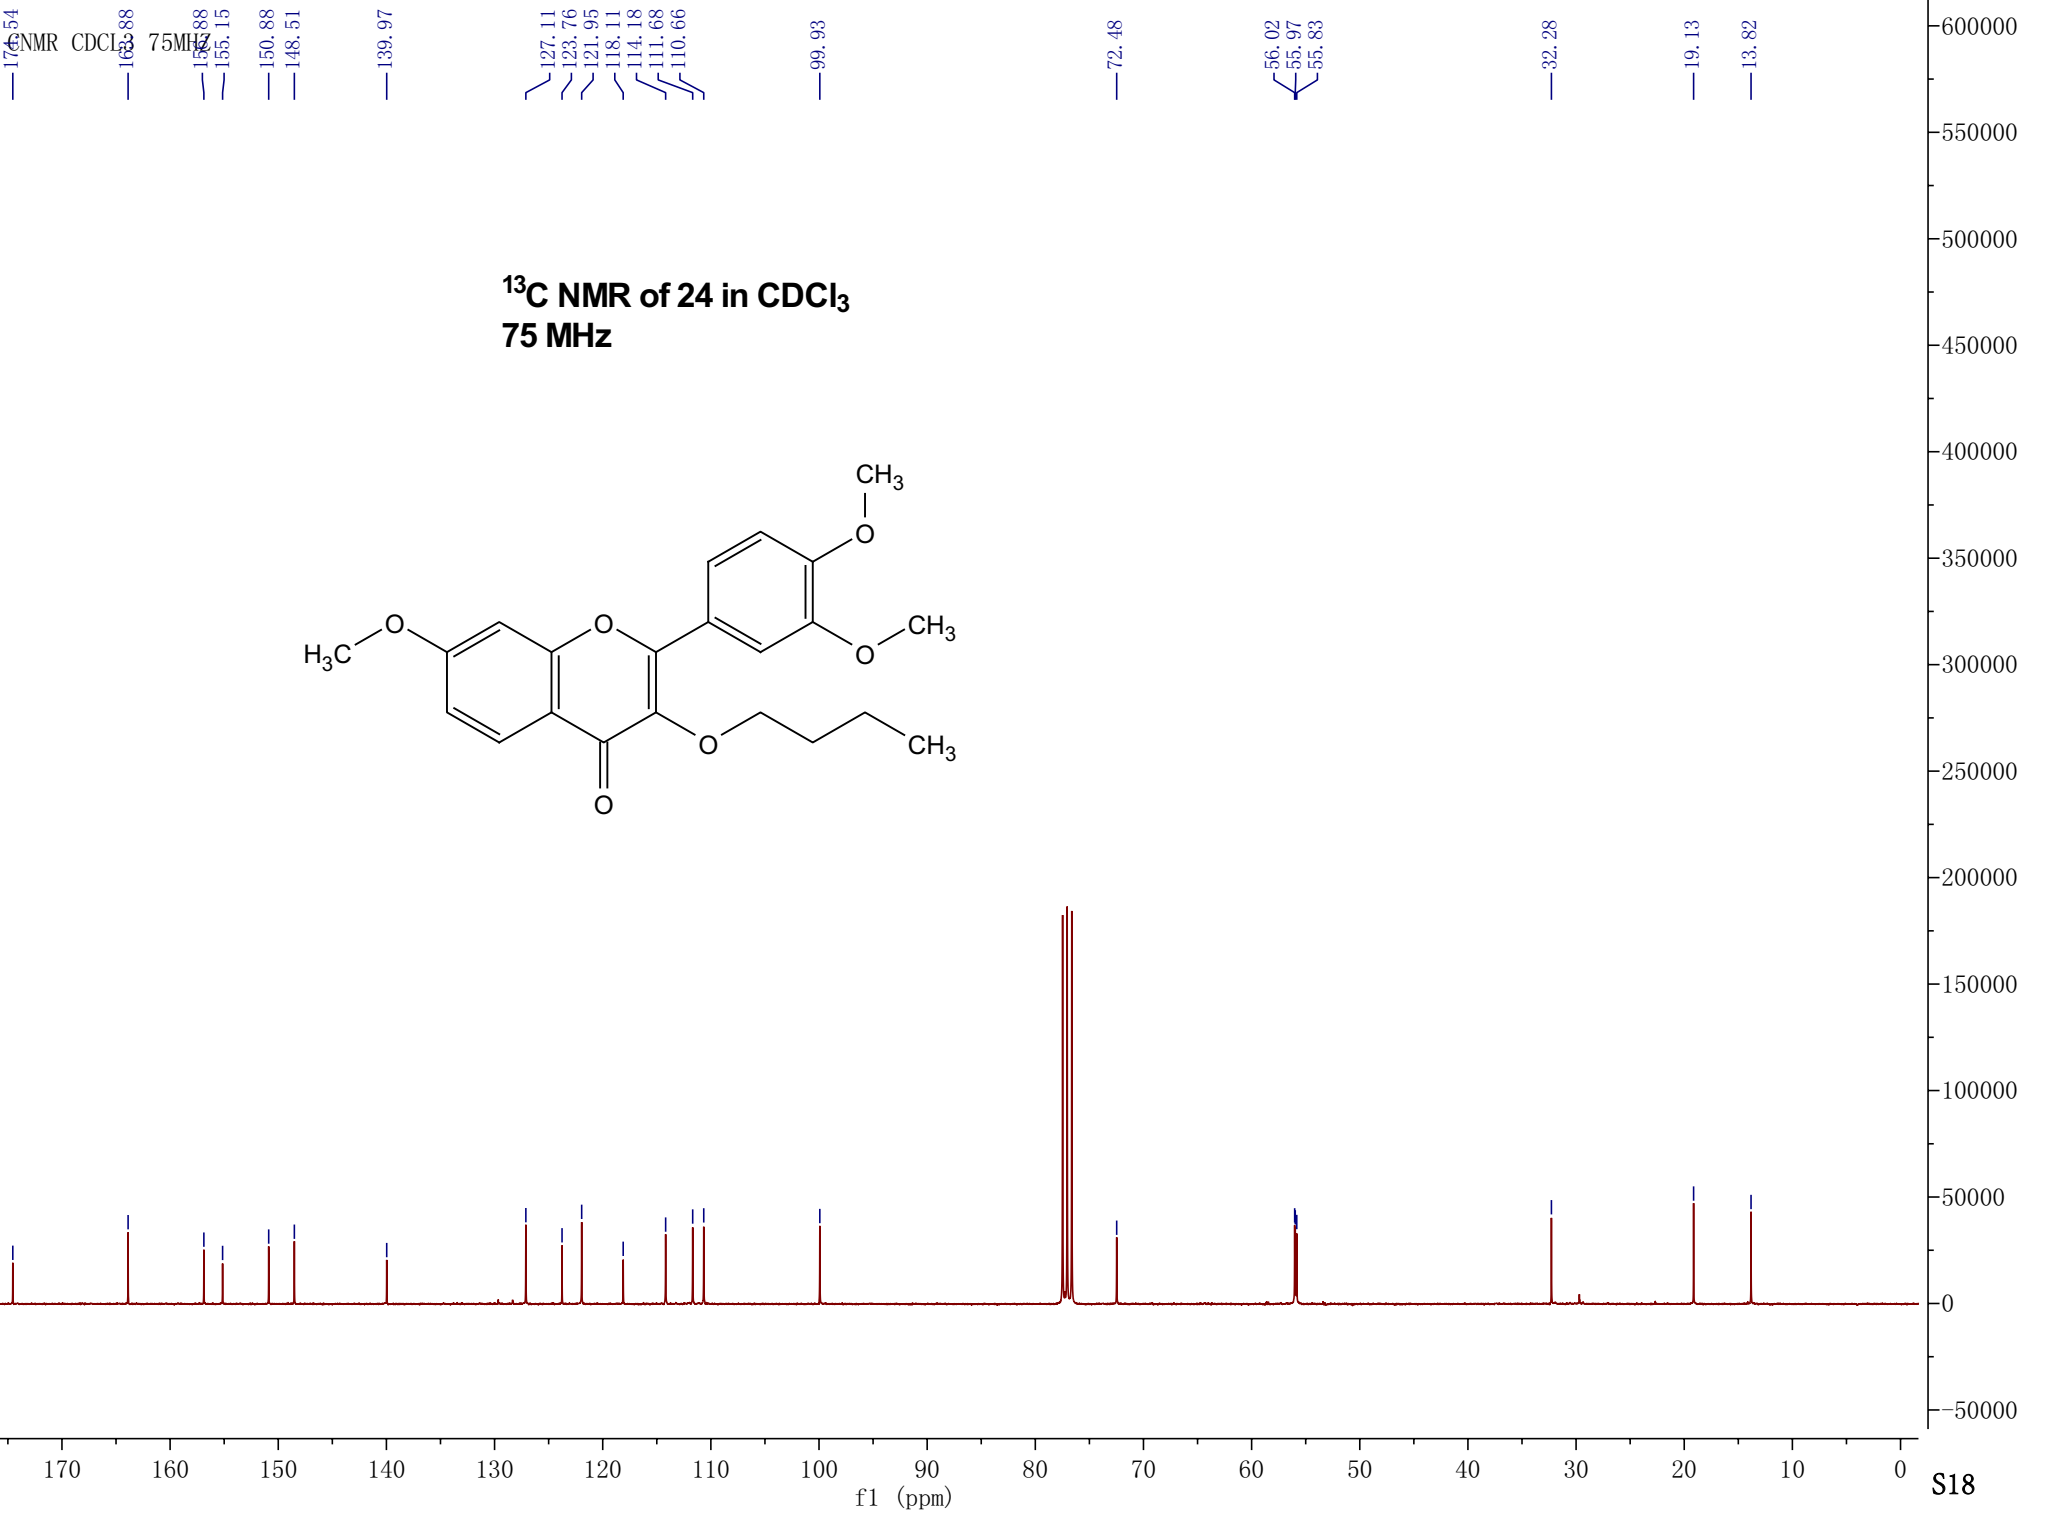

7.15  
7.12  
7.74  
7.73  
7.72  
7.70  
7.69

7.26  
6.99  
6.97  
6.96  
6.94  
6.93  
6.89  
6.89

4.03  
4.01  
3.99  
3.96  
3.91

1.77  
1.74  
1.72  
1.69  
1.67

1.33  
1.31  
1.31  
0.87  
0.85  
0.83

**<sup>1</sup>H NMR of 25 in CDCl<sub>3</sub>  
300 MHz**

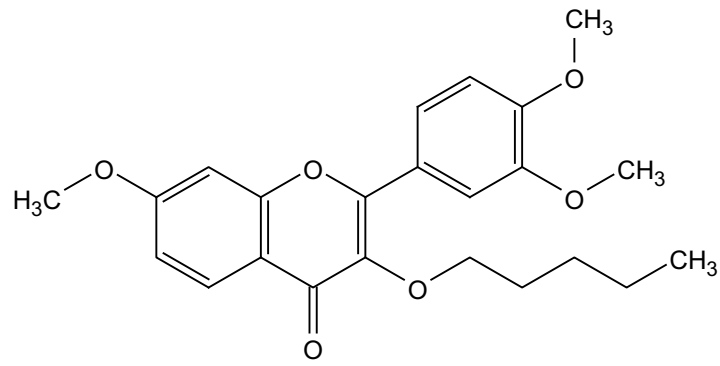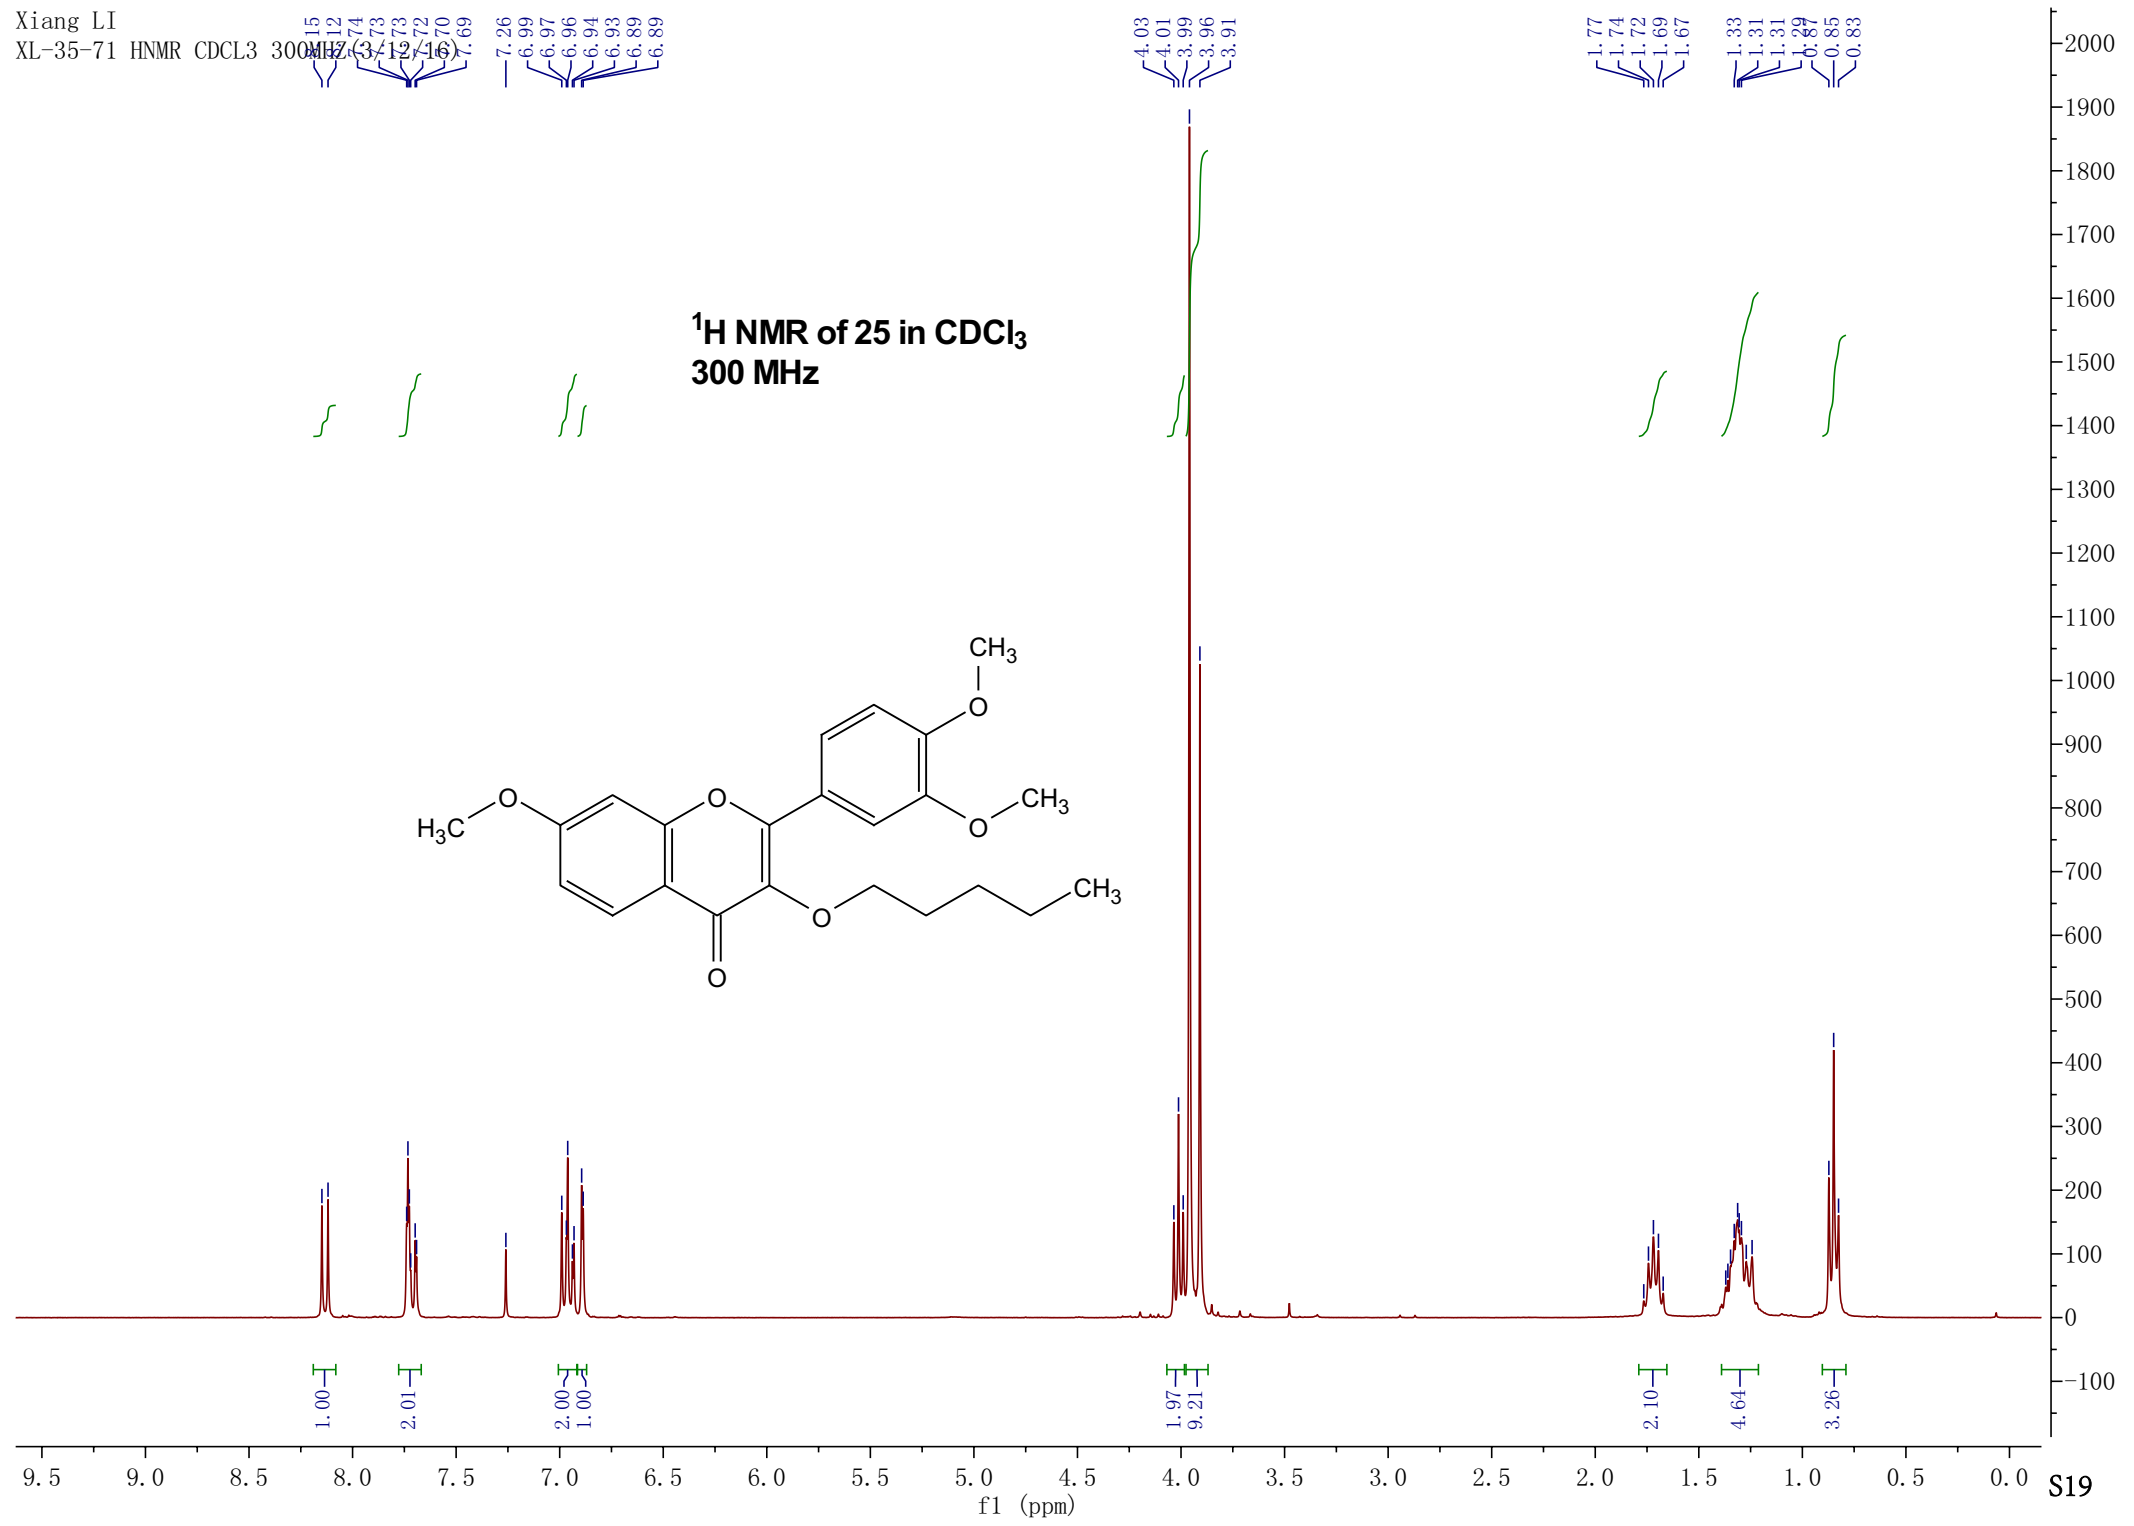

Xiang LI  
XL-35-71

CNMR CDCl<sub>3</sub> 75MHz (3/16)

177.65  
167.99  
157.00  
154.29  
150.99  
148.63

140.08

127.23  
123.88  
122.07  
118.23  
114.30  
111.80  
110.76

100.04

77.58  
77.16  
76.74  
72.89

56.14  
56.08  
55.95

30.05  
28.20

22.56

14.12

**<sup>13</sup>C NMR of 25 in CDCl<sub>3</sub>  
75 MHz**

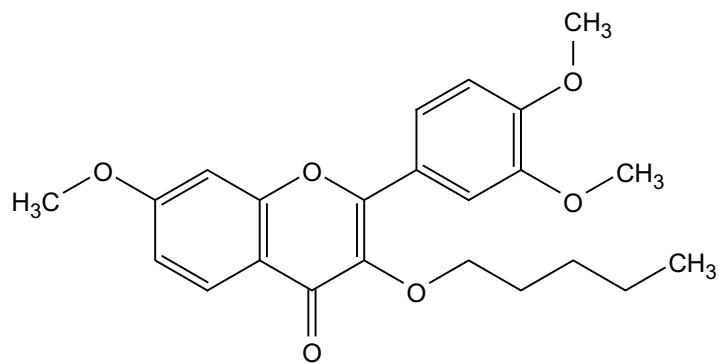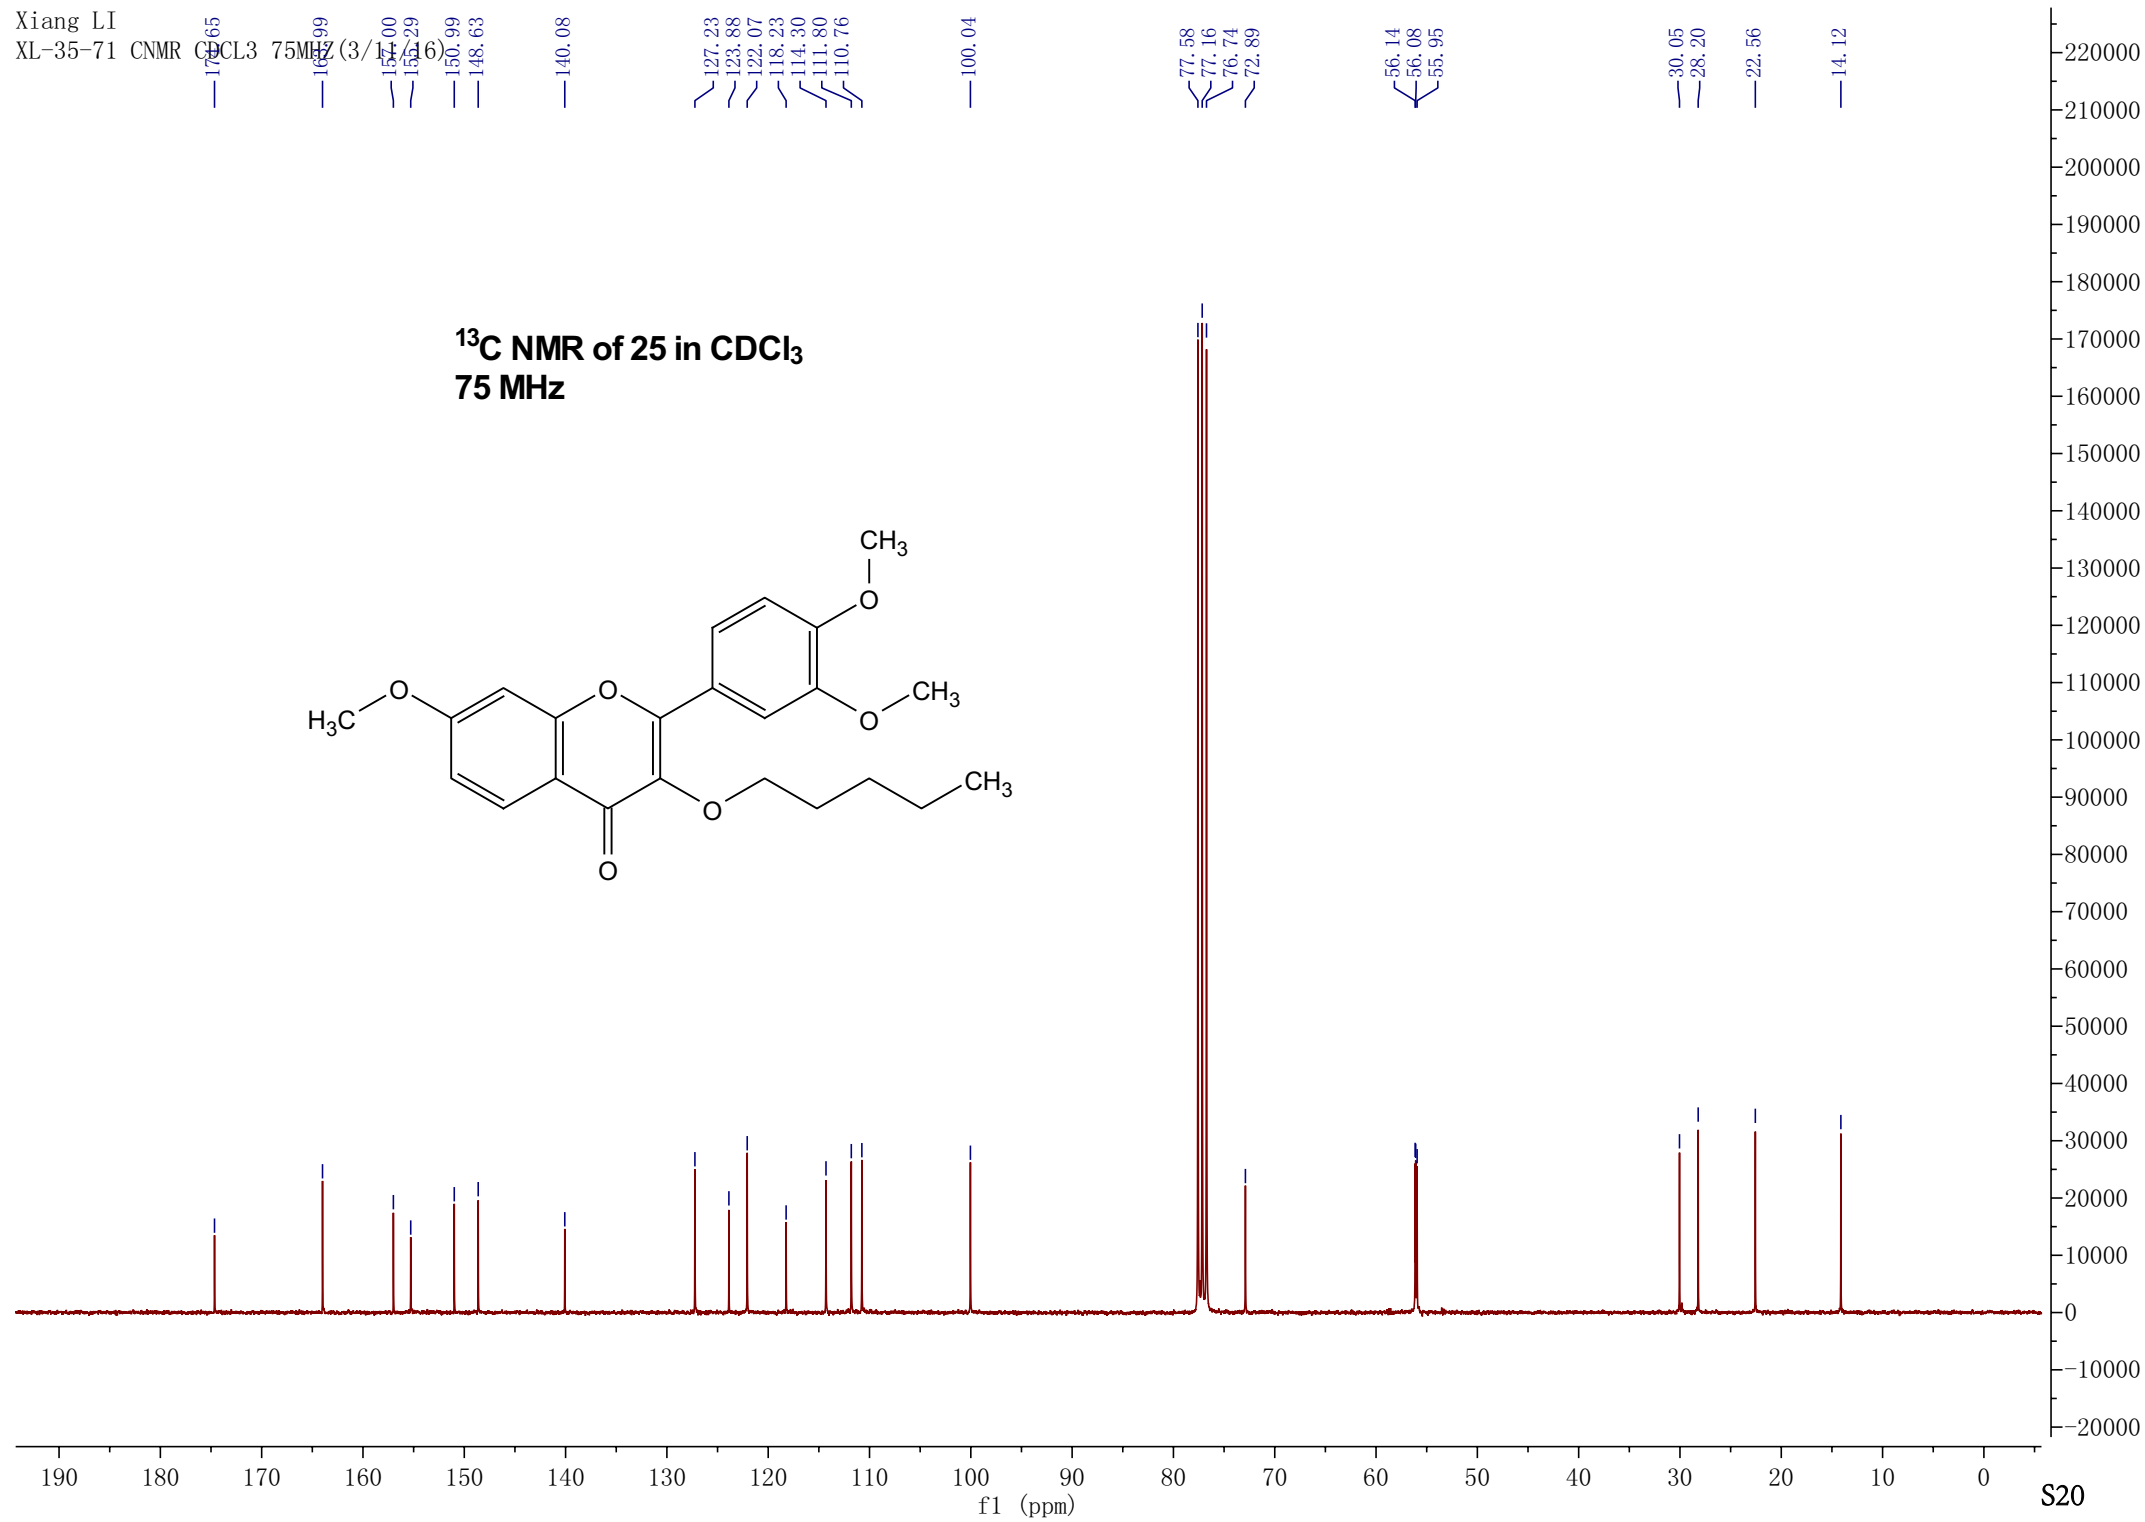



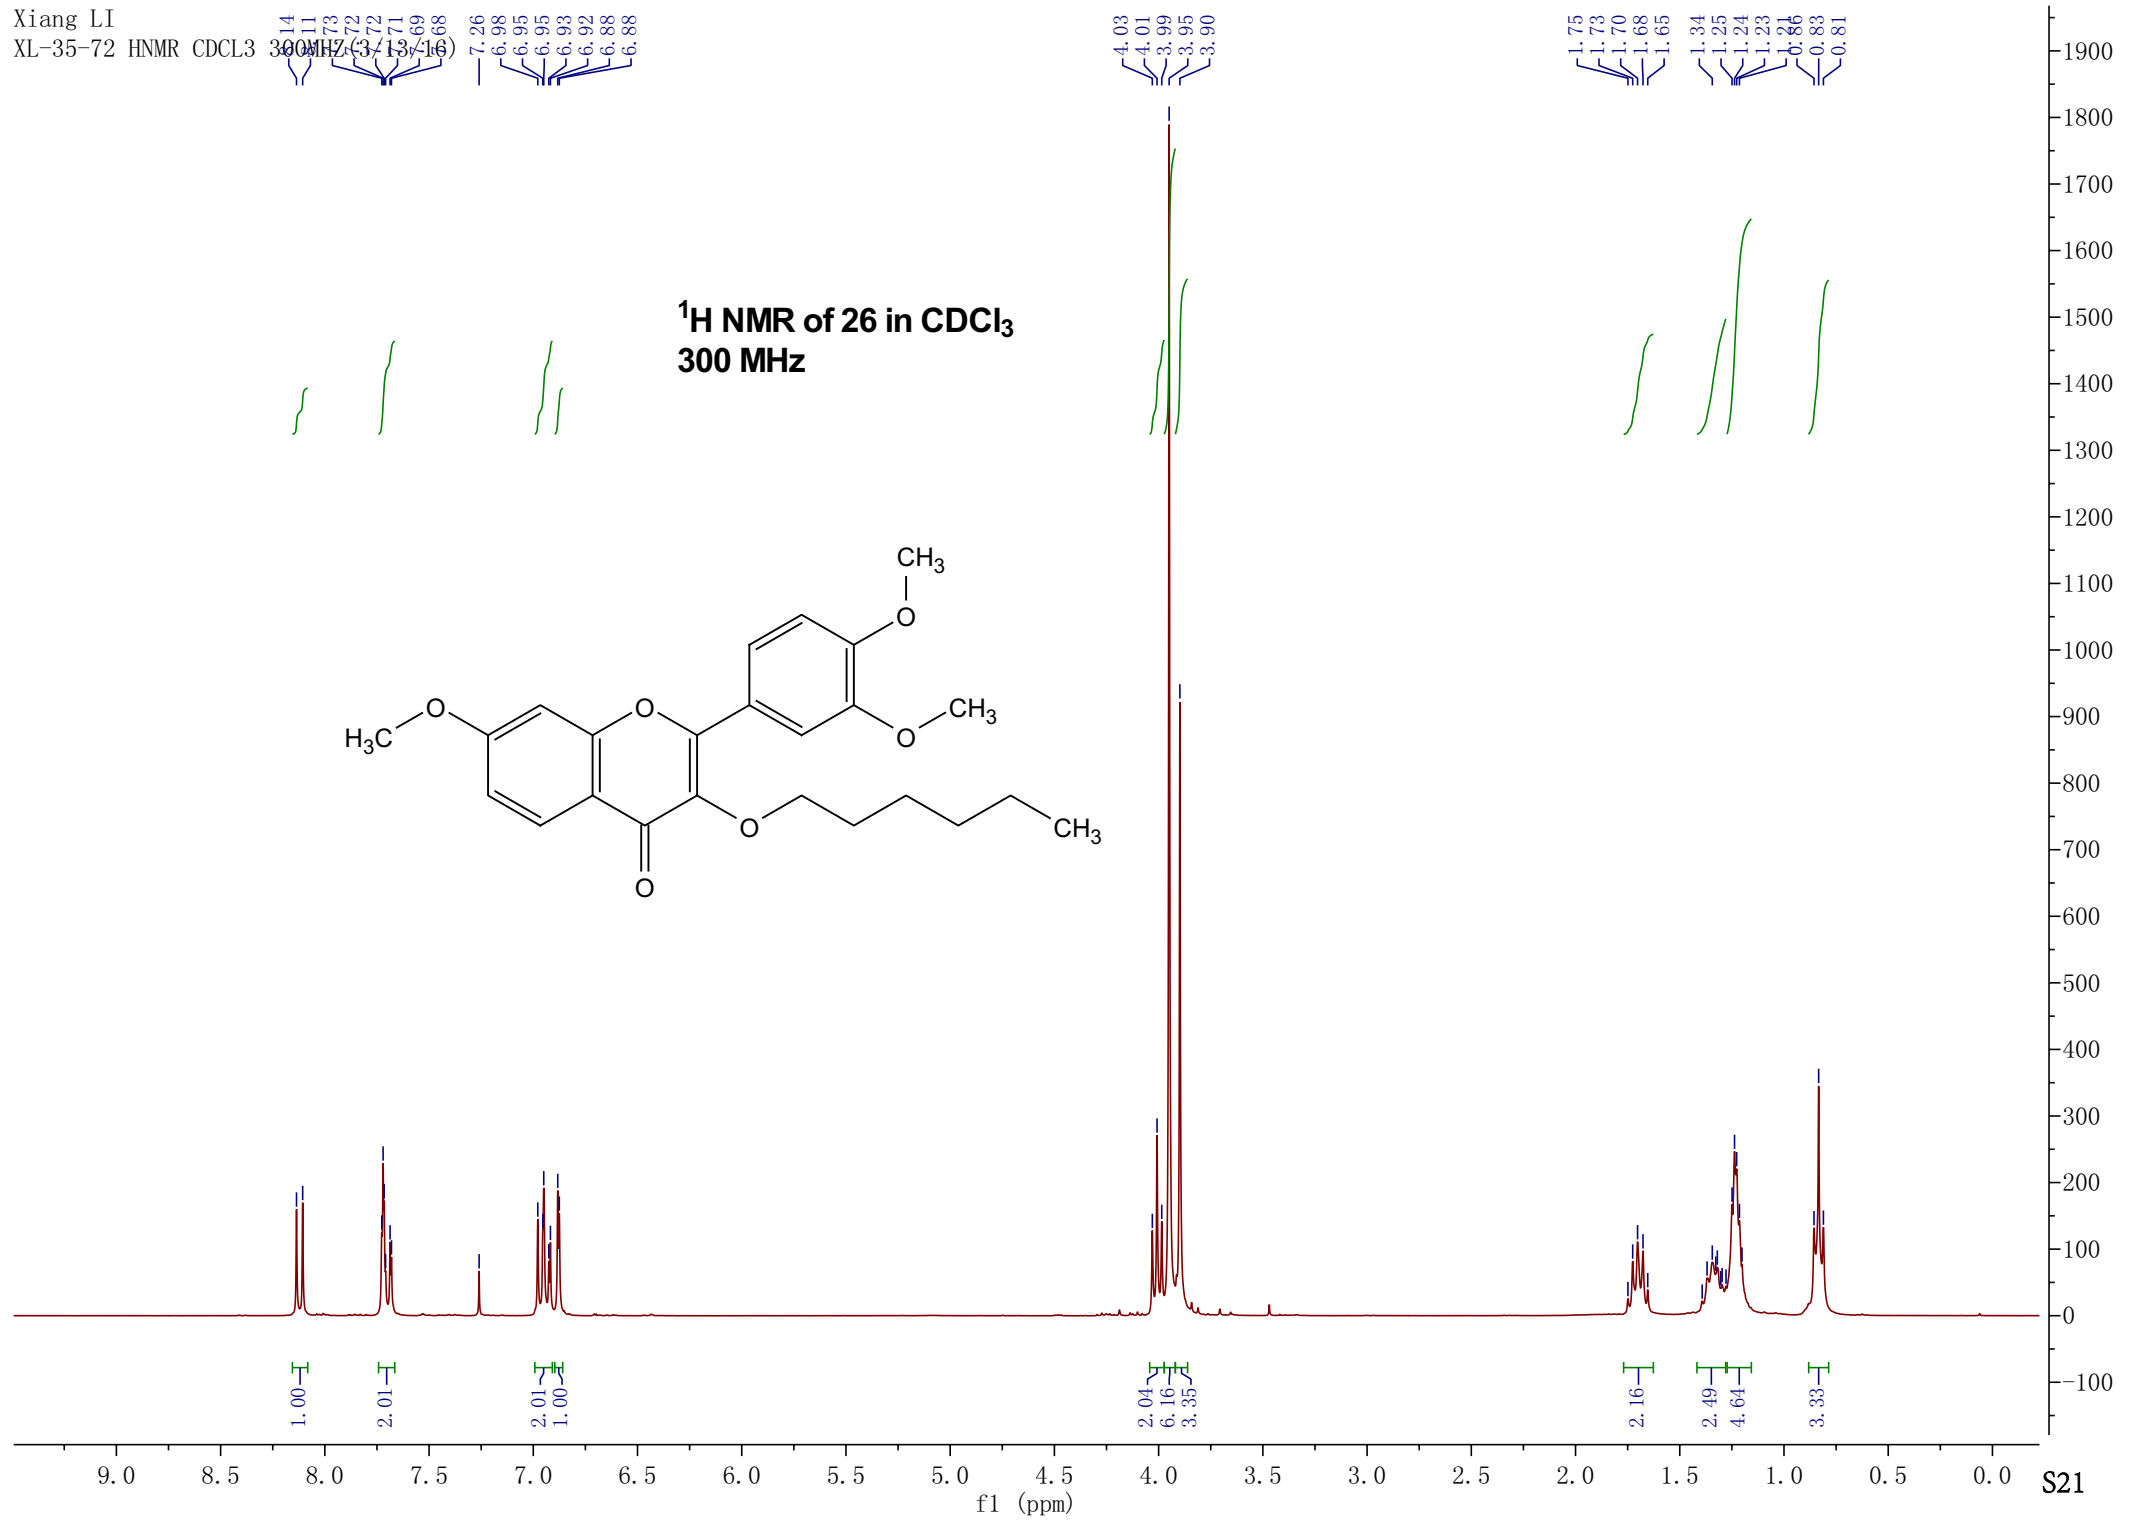

Xiang LI

XL-35-72 CNMR CDCl<sub>3</sub> 75MHz/12

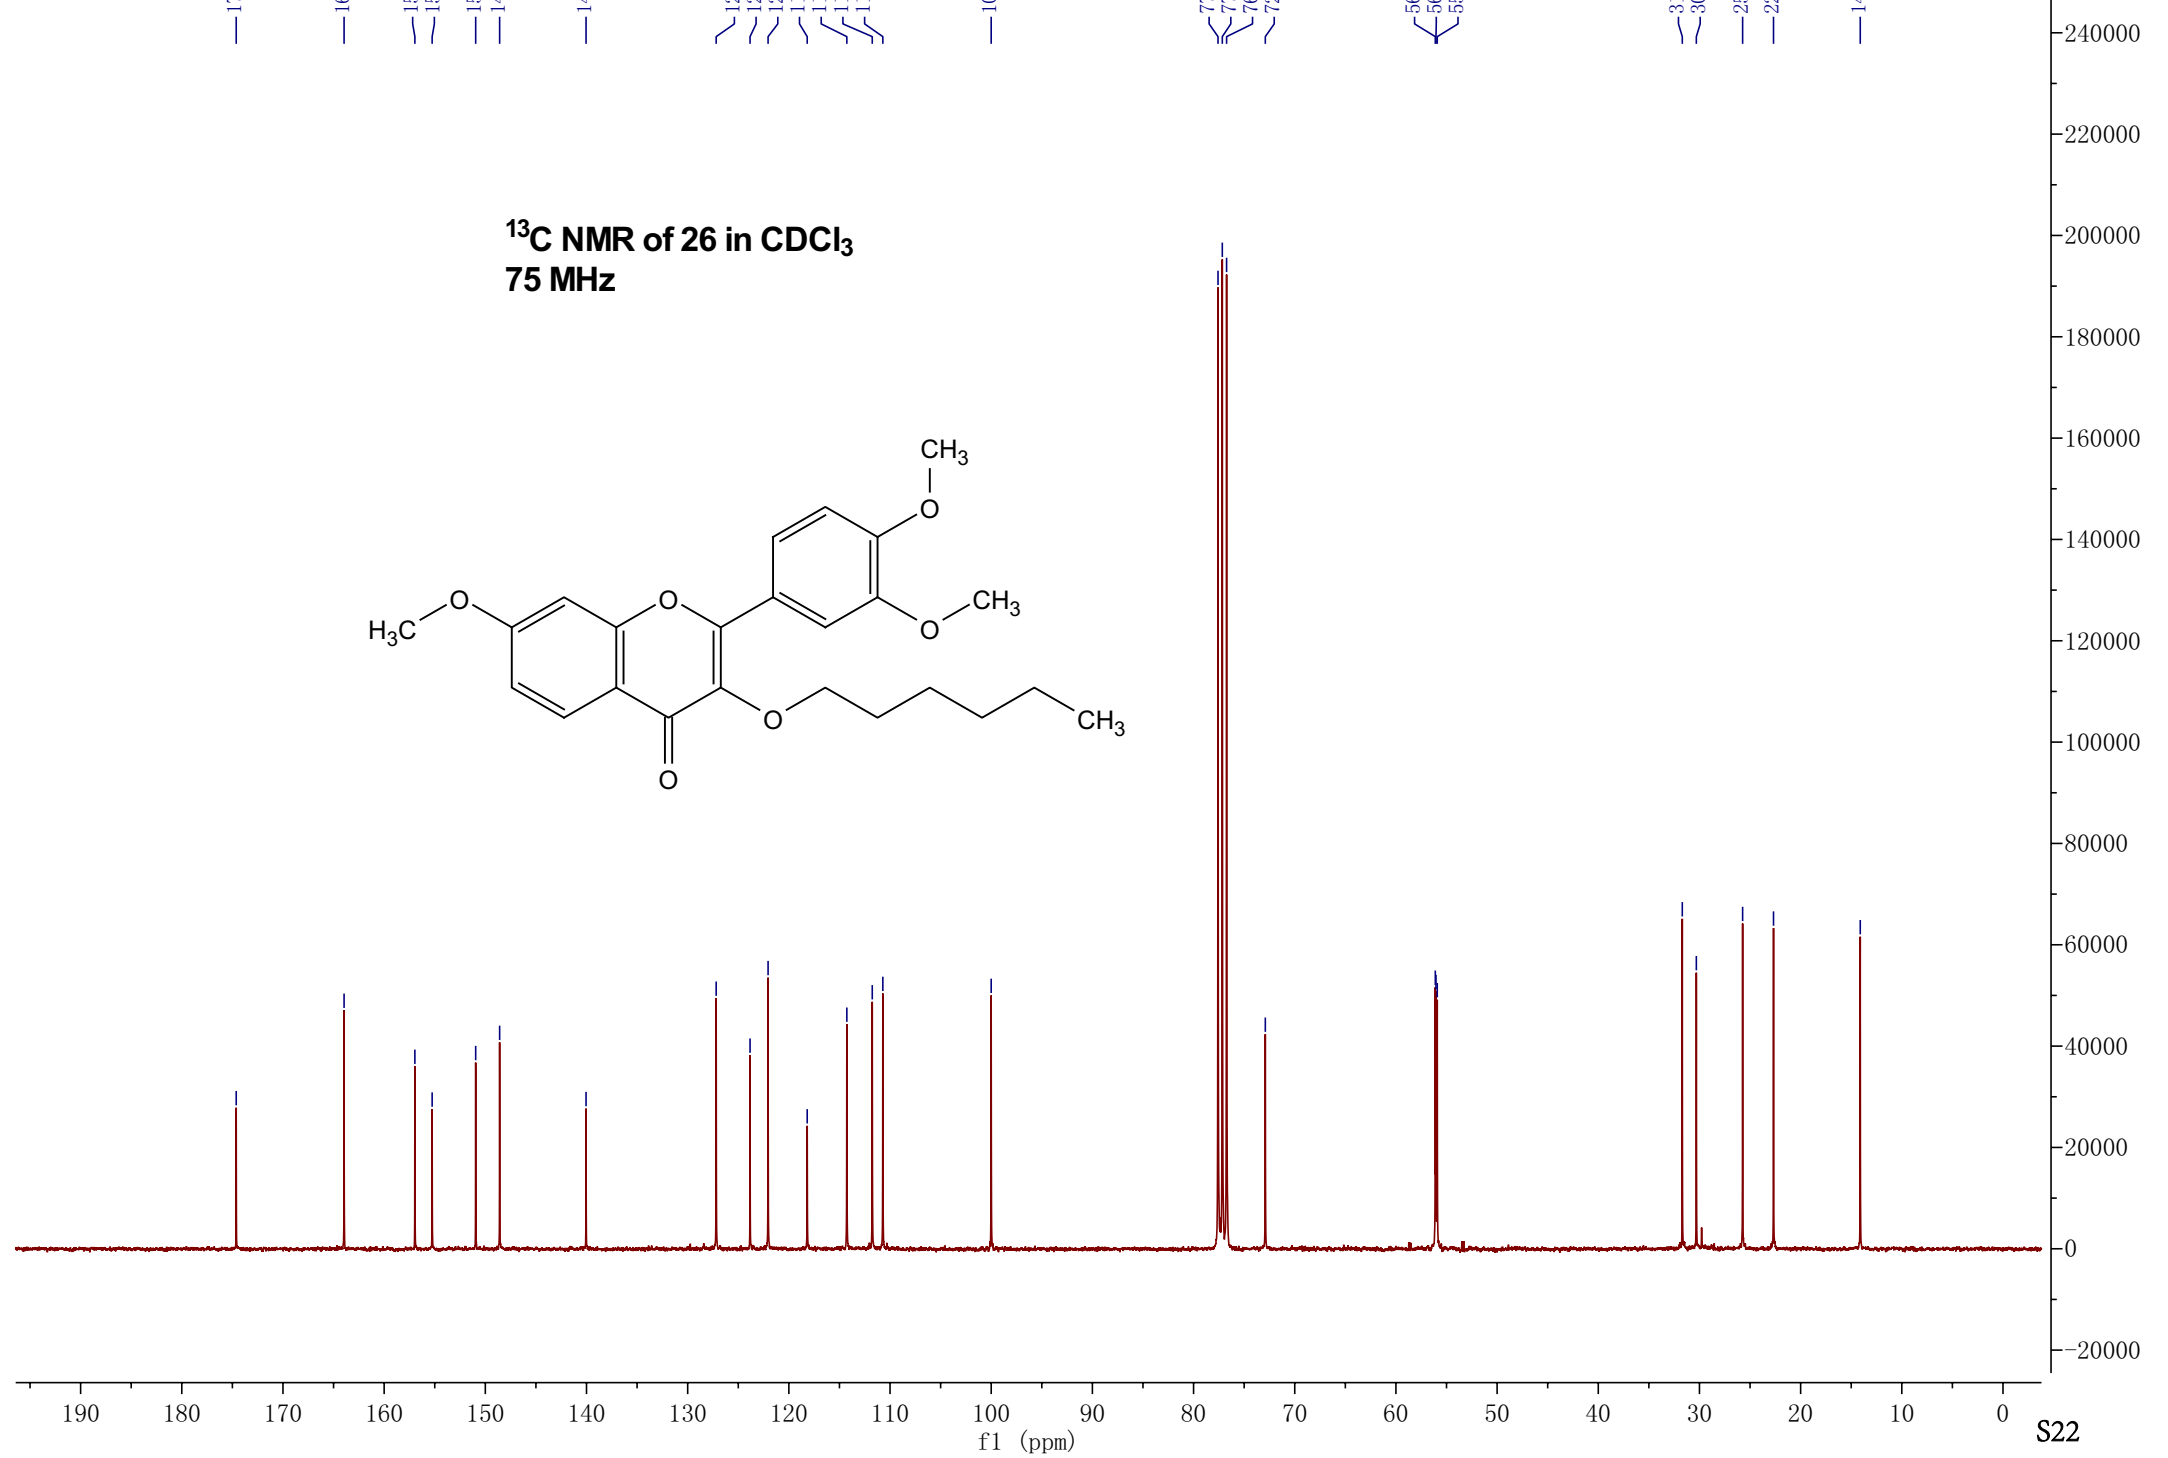

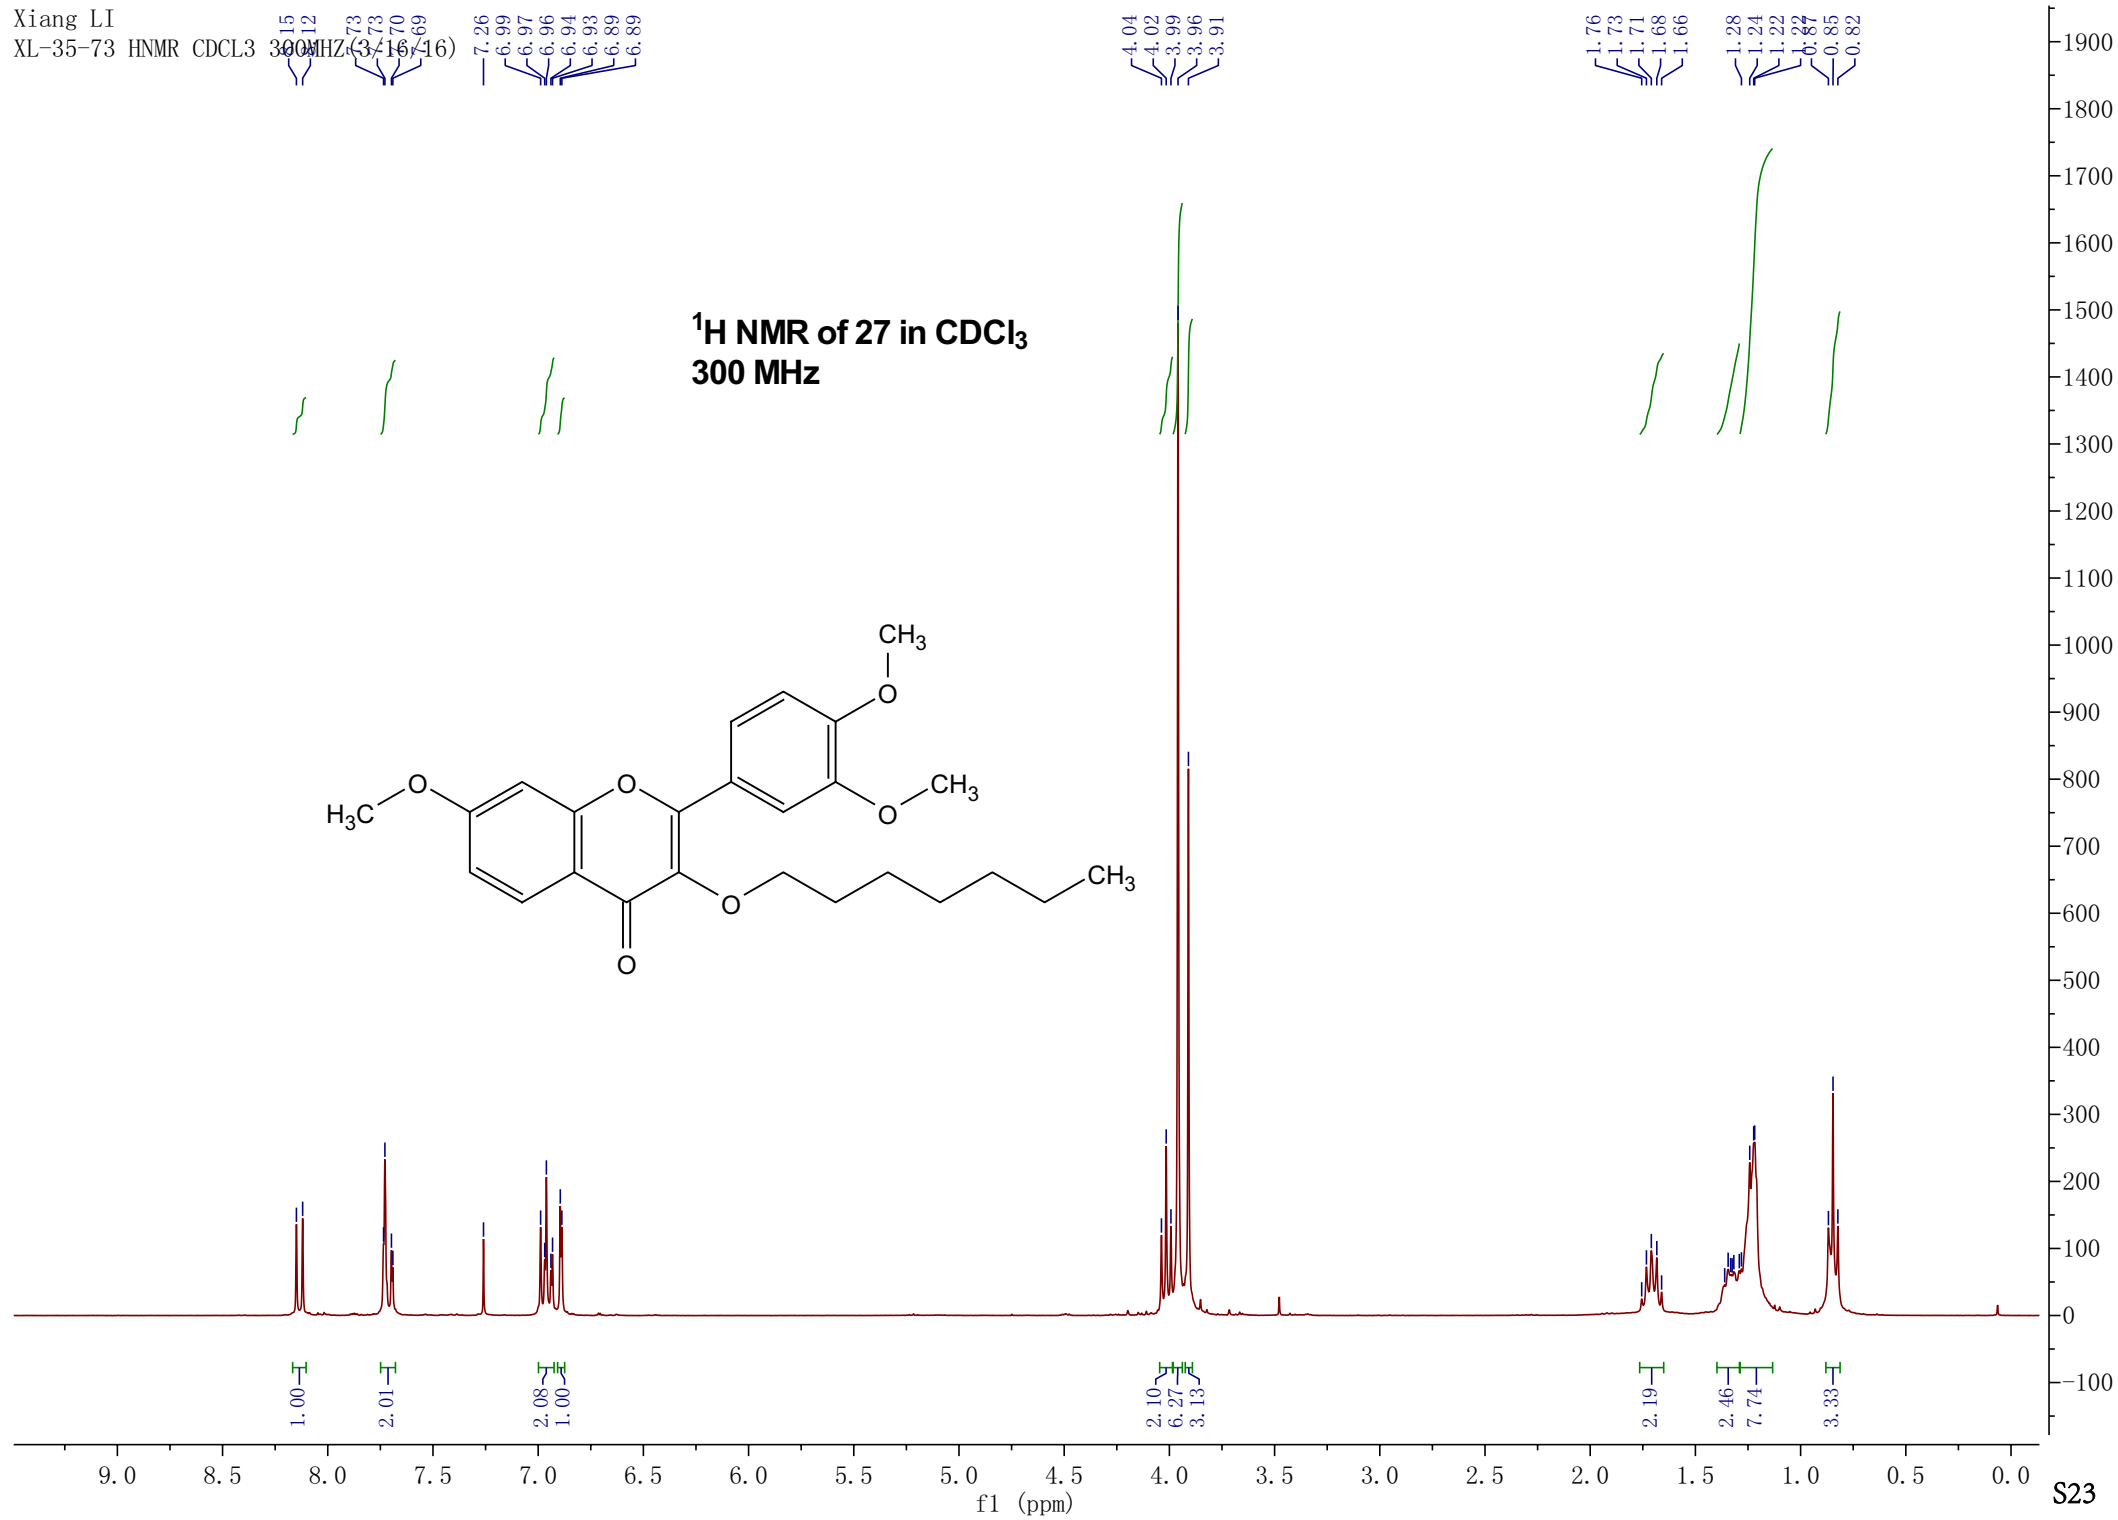

Xiang LI  
XL-35-73 CNMR CDCL3 75MHz (3/15/16)

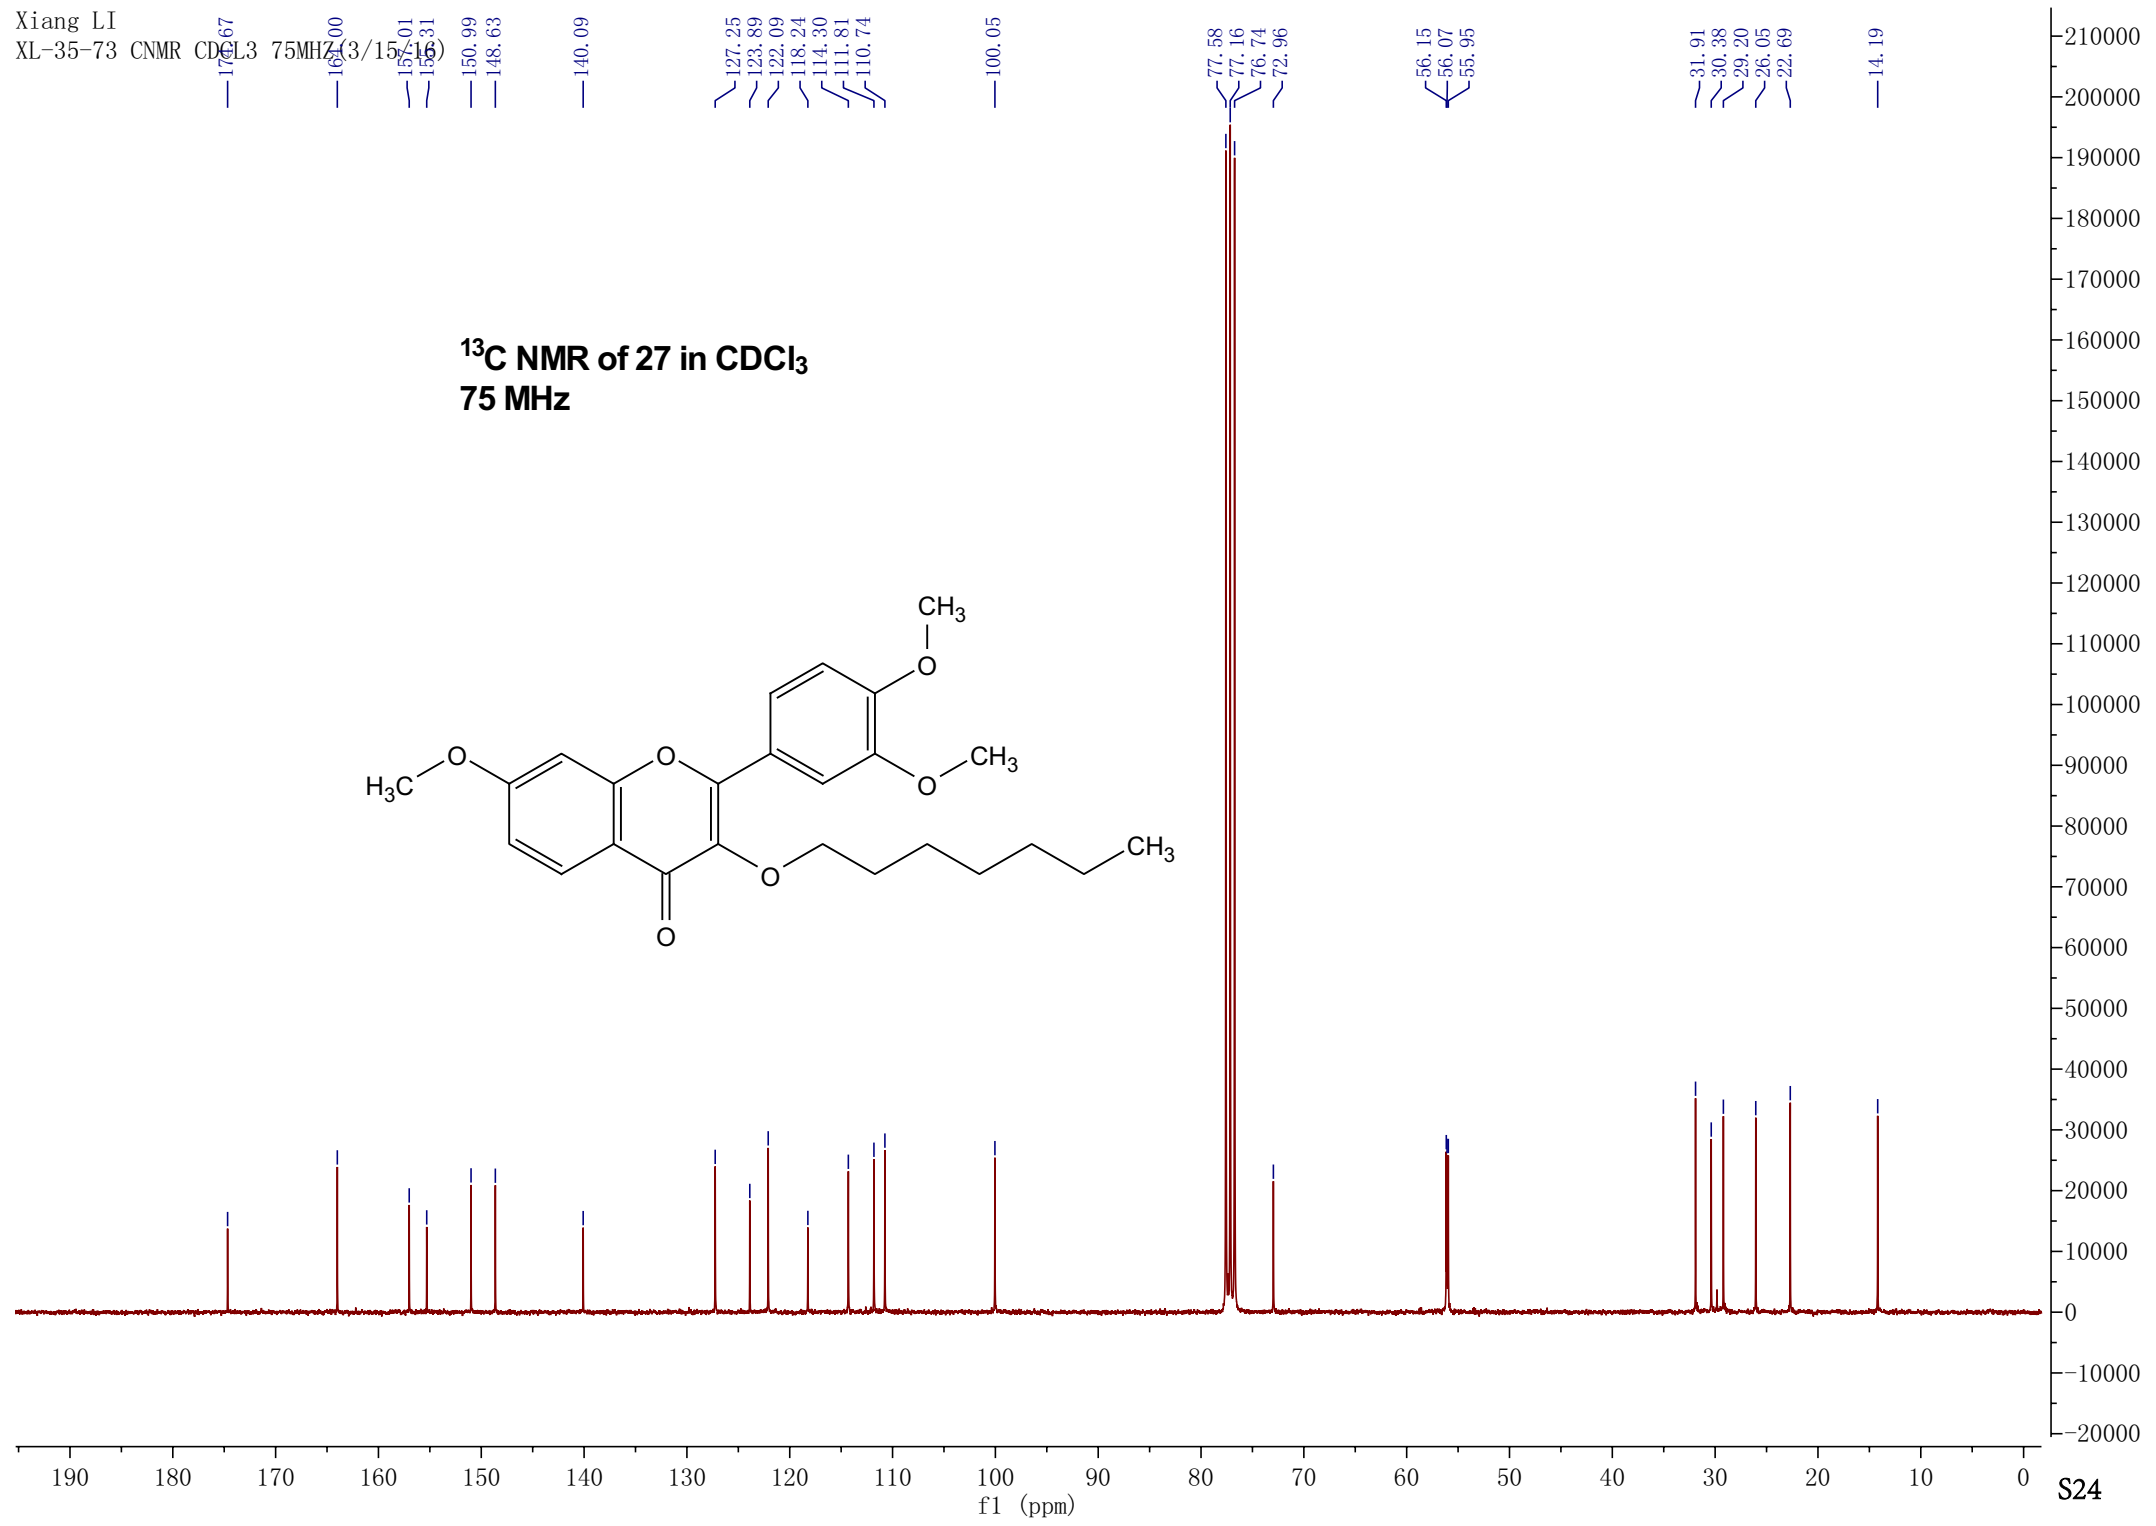

7.14  
7.11  
7.82  
7.81  
7.74  
7.74  
7.71  
7.71  
7.26  
6.98  
6.97  
6.96  
6.95  
6.94  
6.93  
6.90  
6.89

4.76  
4.74  
4.72  
4.70  
4.68  
4.66  
4.64

3.96  
3.91

1.20  
1.18

**<sup>1</sup>H NMR of 28 in CDCl<sub>3</sub>  
300 MHz**

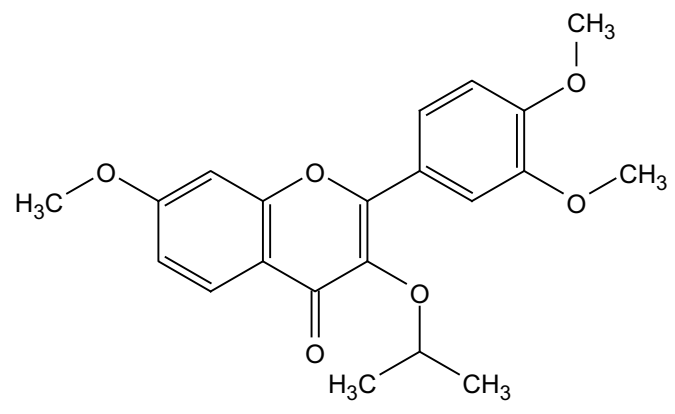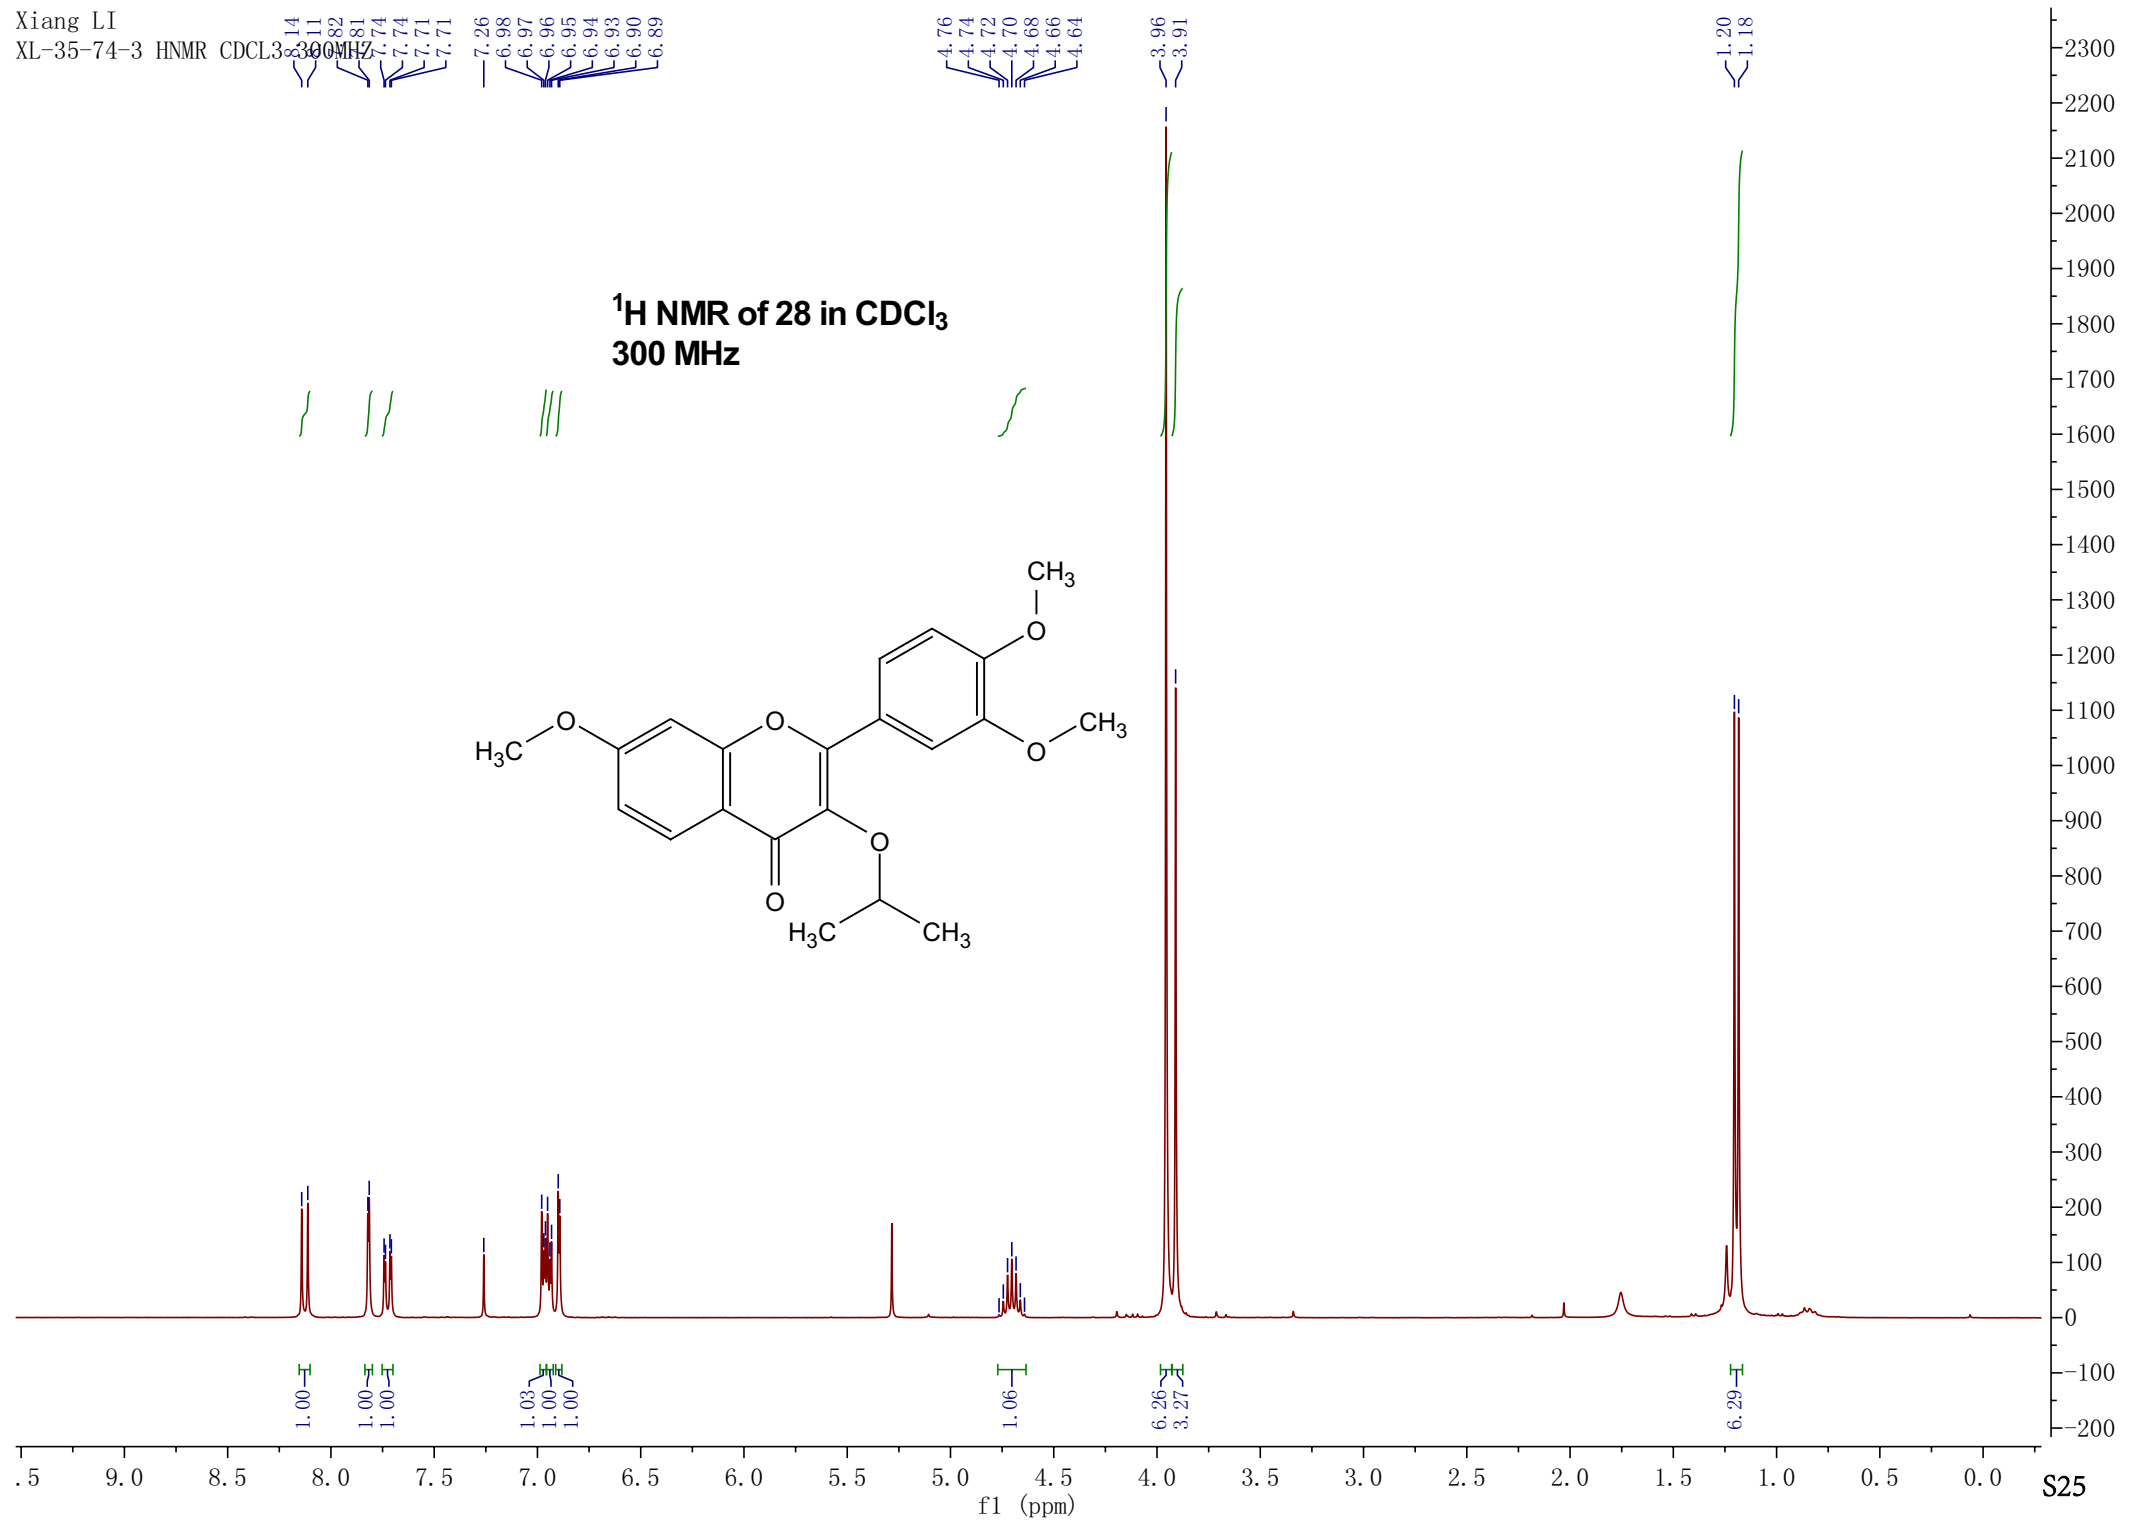

**<sup>13</sup>C NMR of 28 in CDCl<sub>3</sub>  
75 MHz**

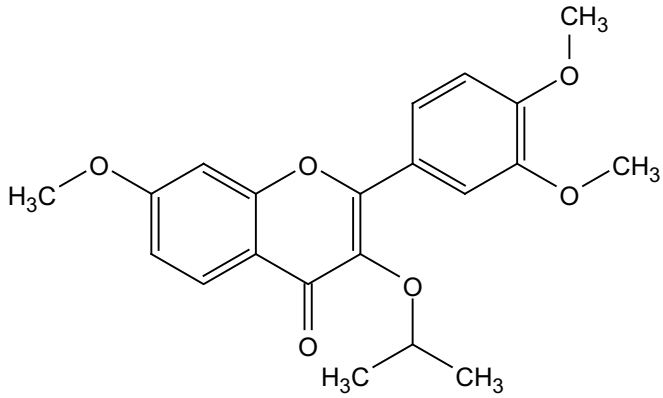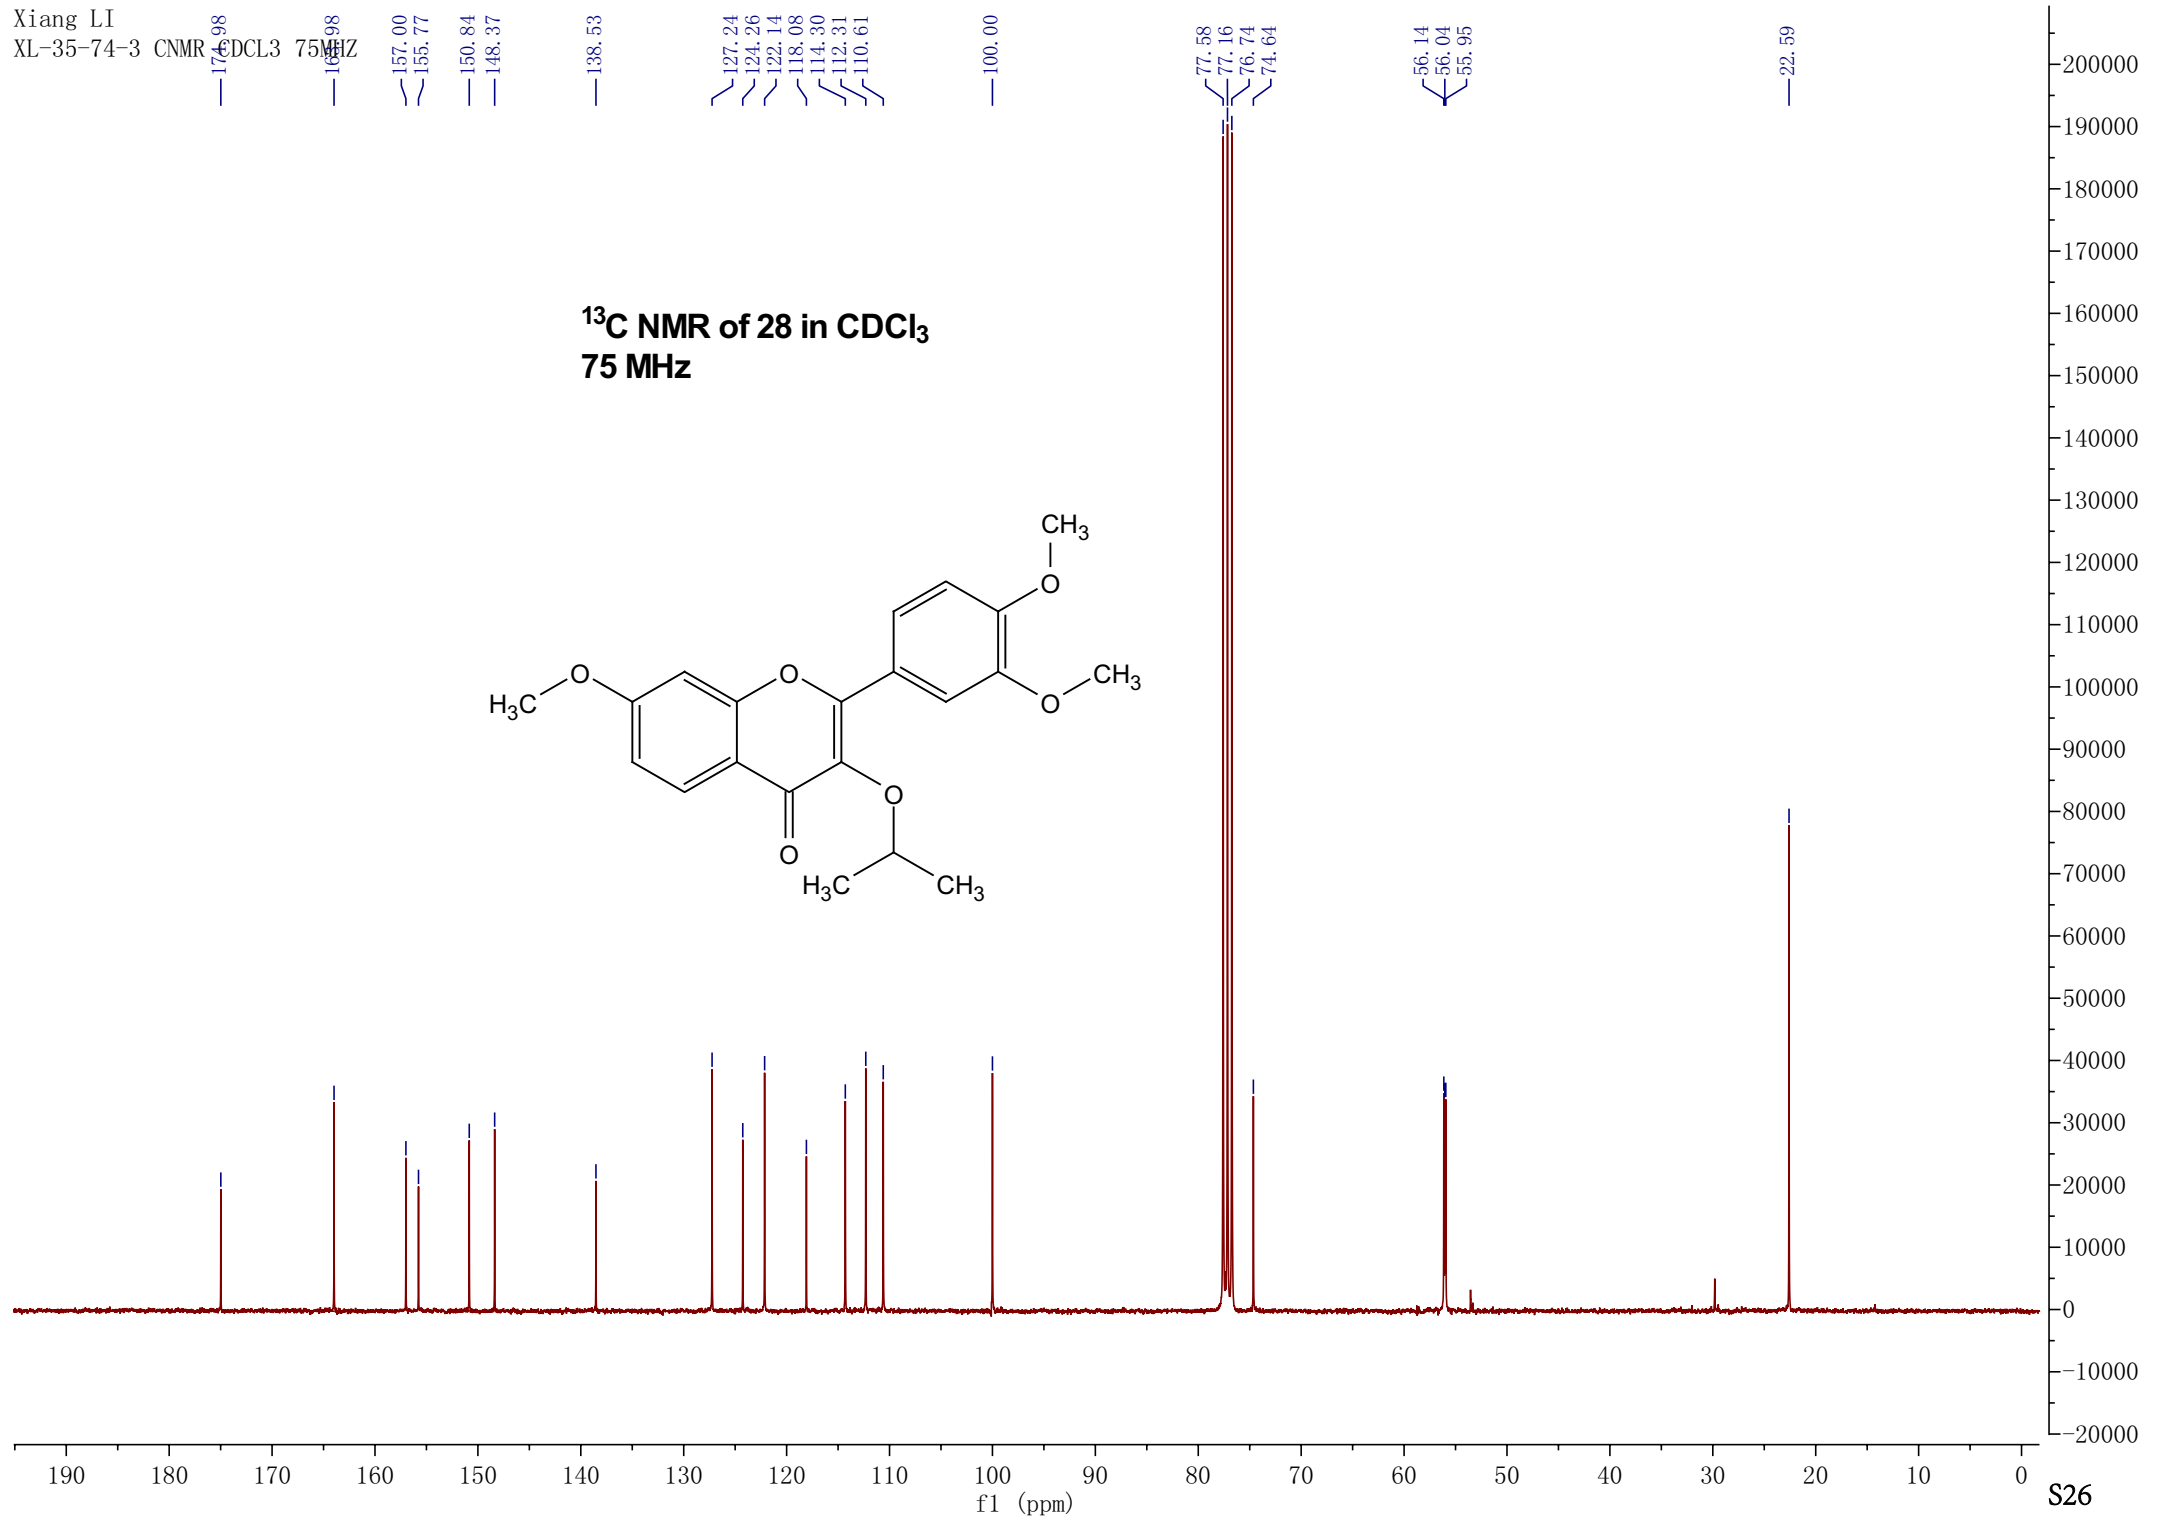

Maizie Lee

ML-40-1-2 HNMR CDCL<sub>3</sub> 300MHz (06/13/16)

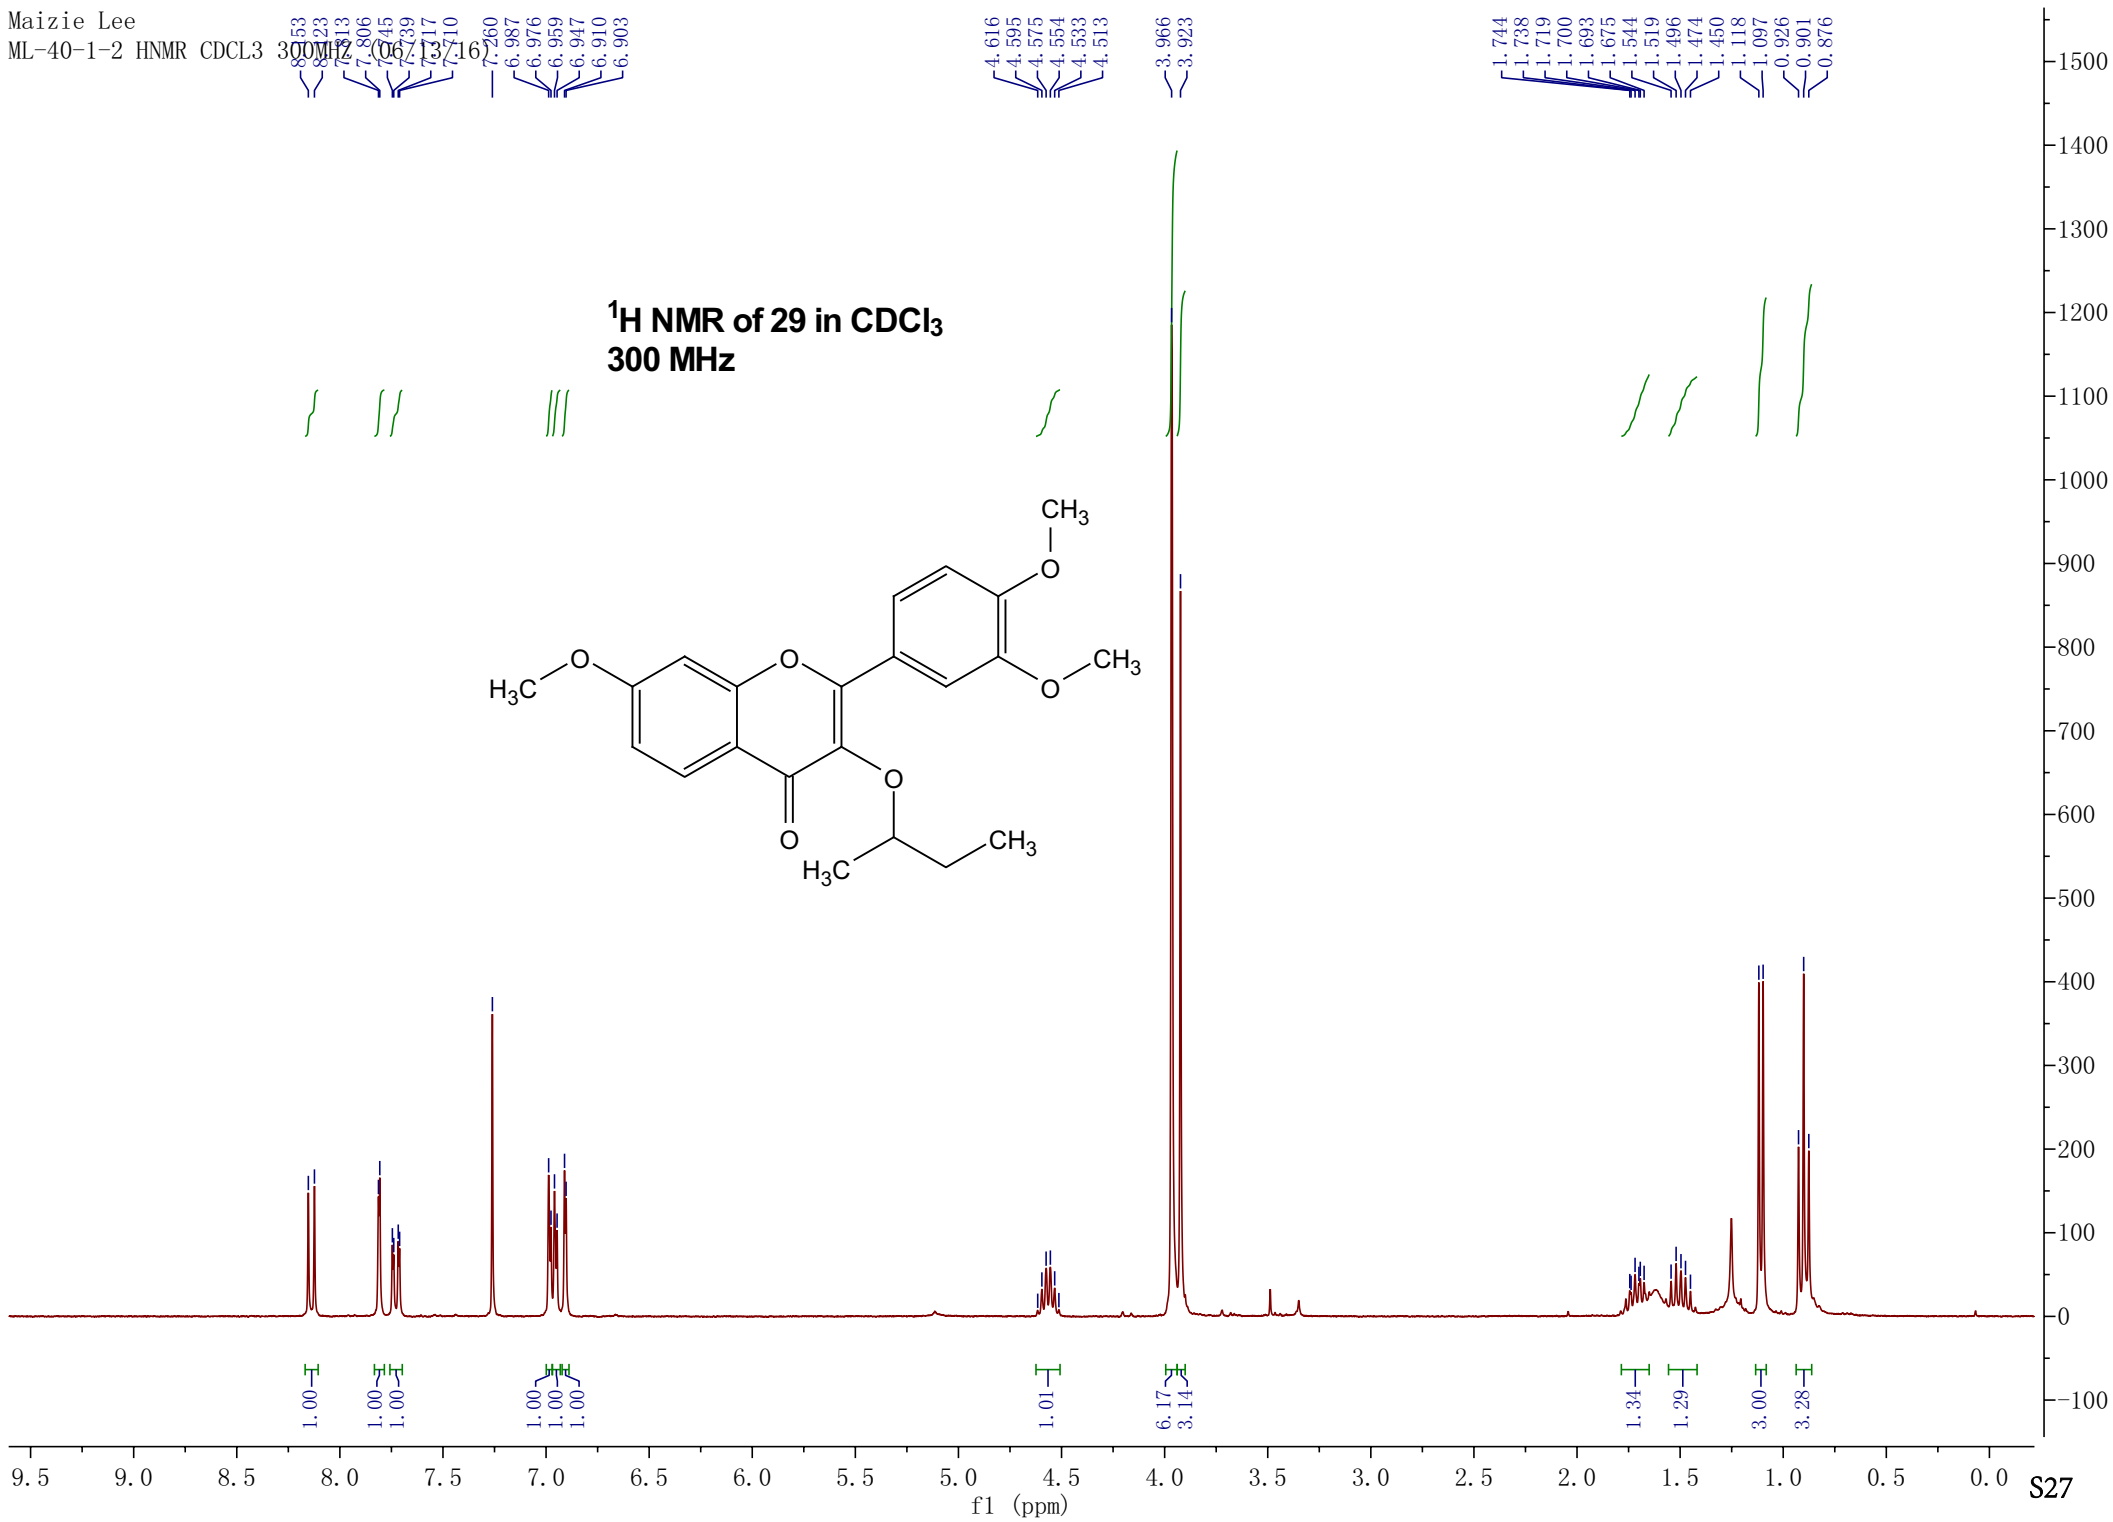

Maizie Lee  
ML-40-1-2 CNMR

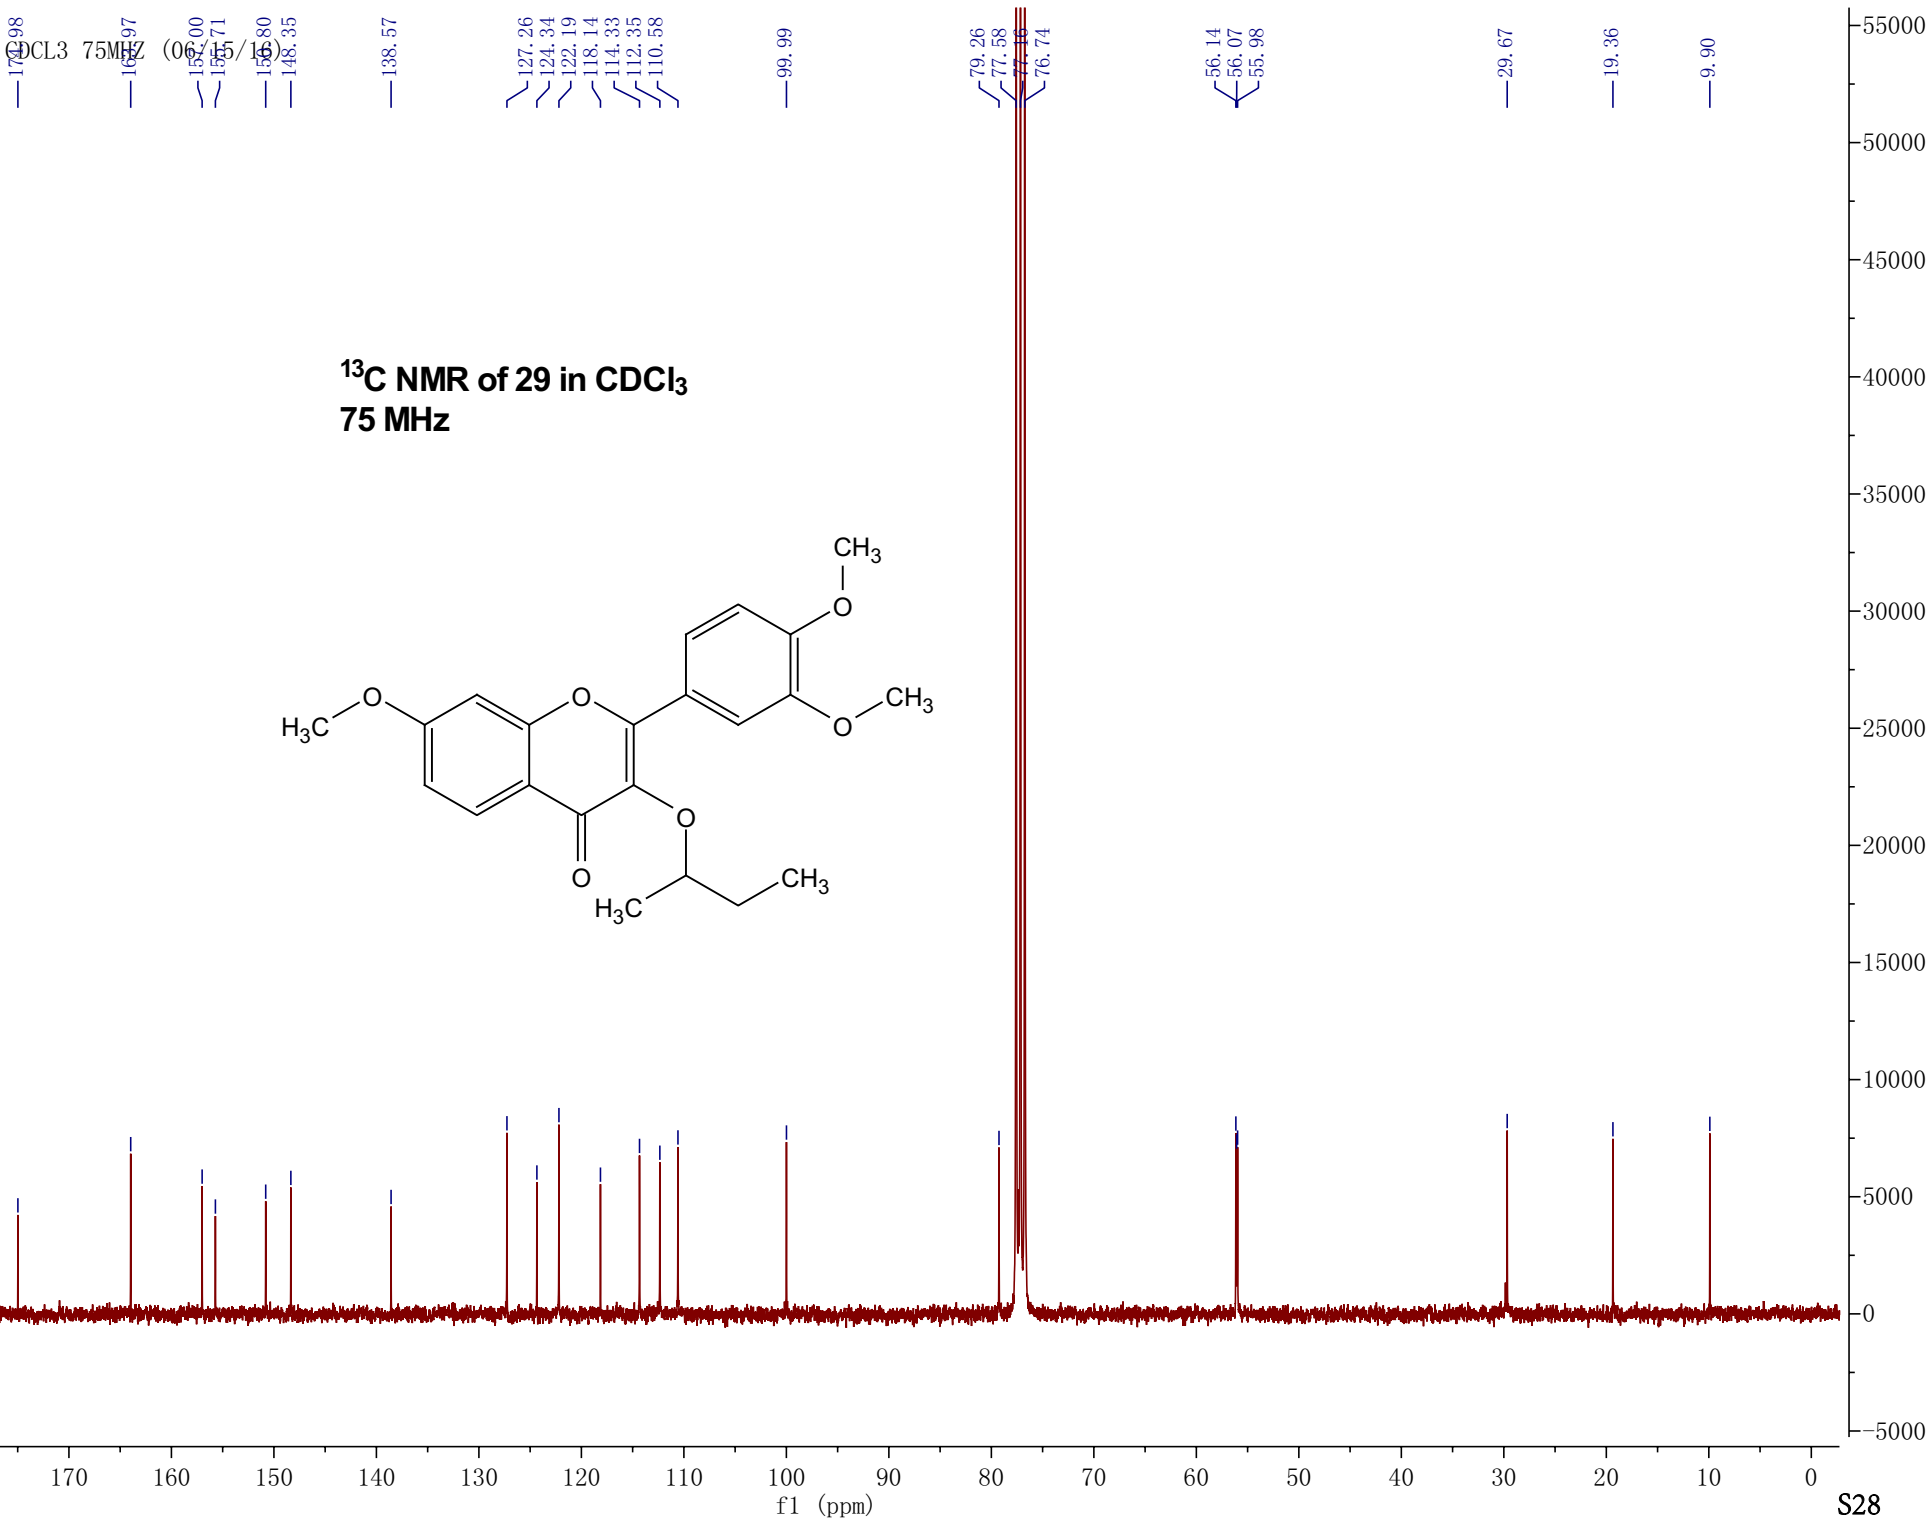



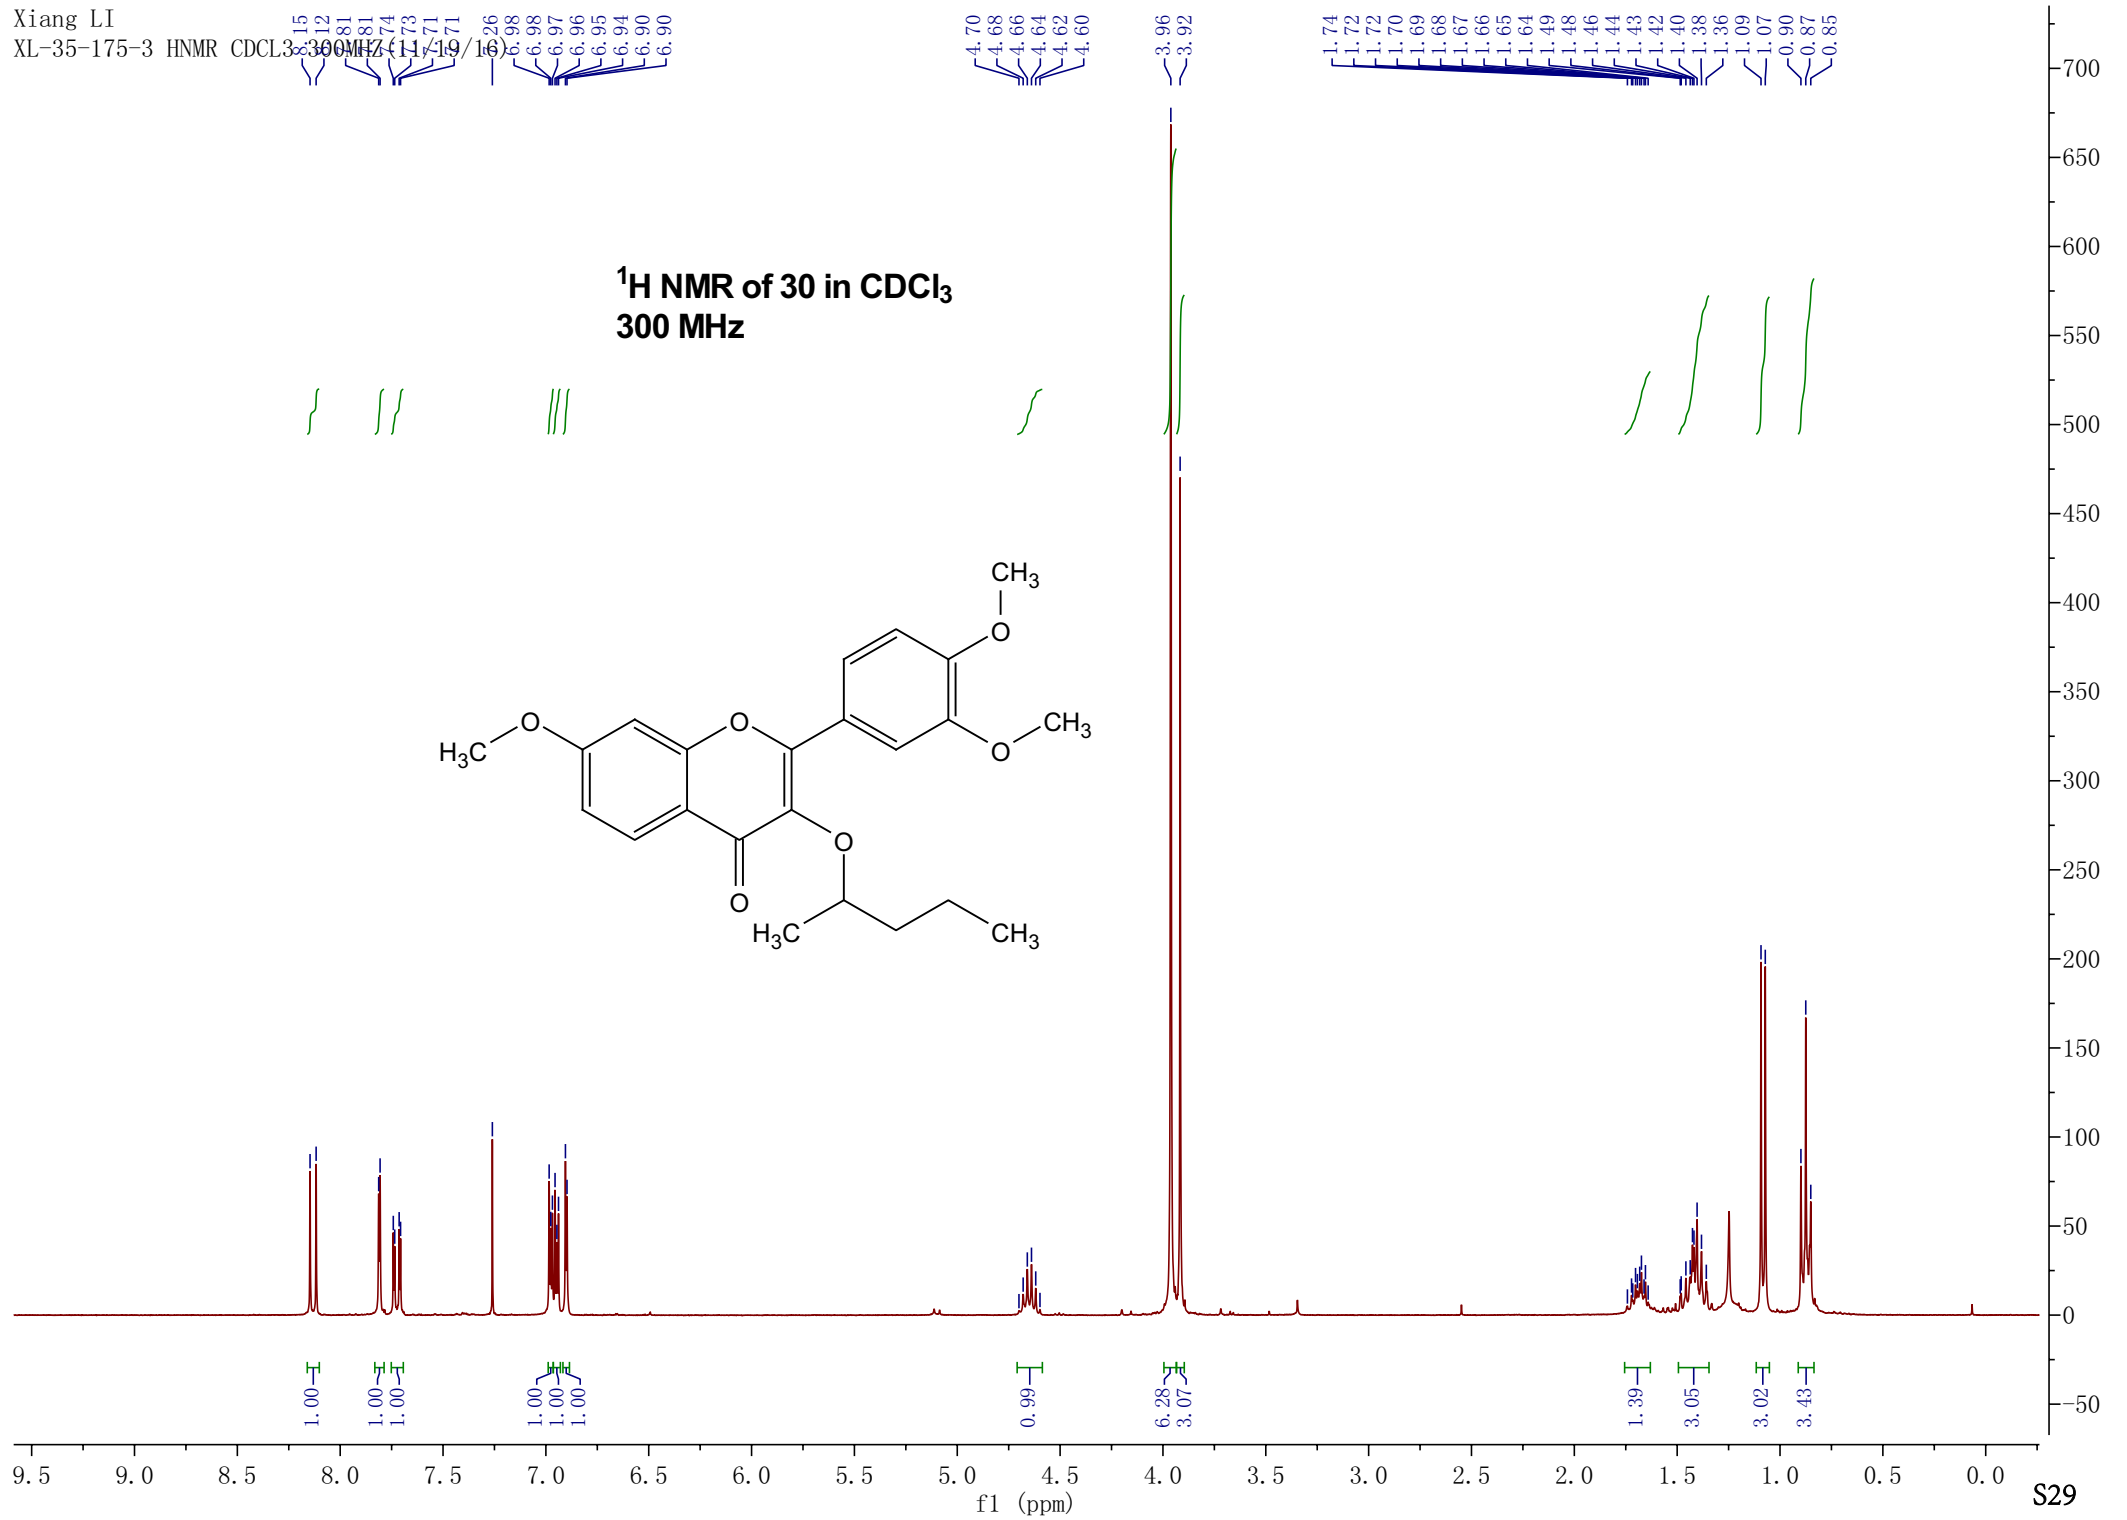

Xiang LI

XL-35-175-3 NMR CDCL3

**<sup>13</sup>C NMR of 30 in CDCl<sub>3</sub>  
75 MHz**

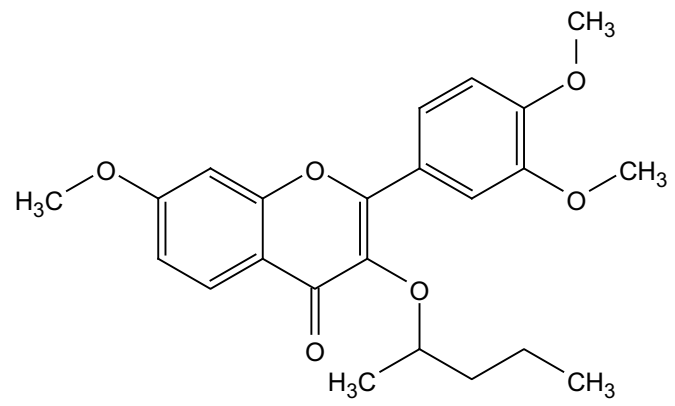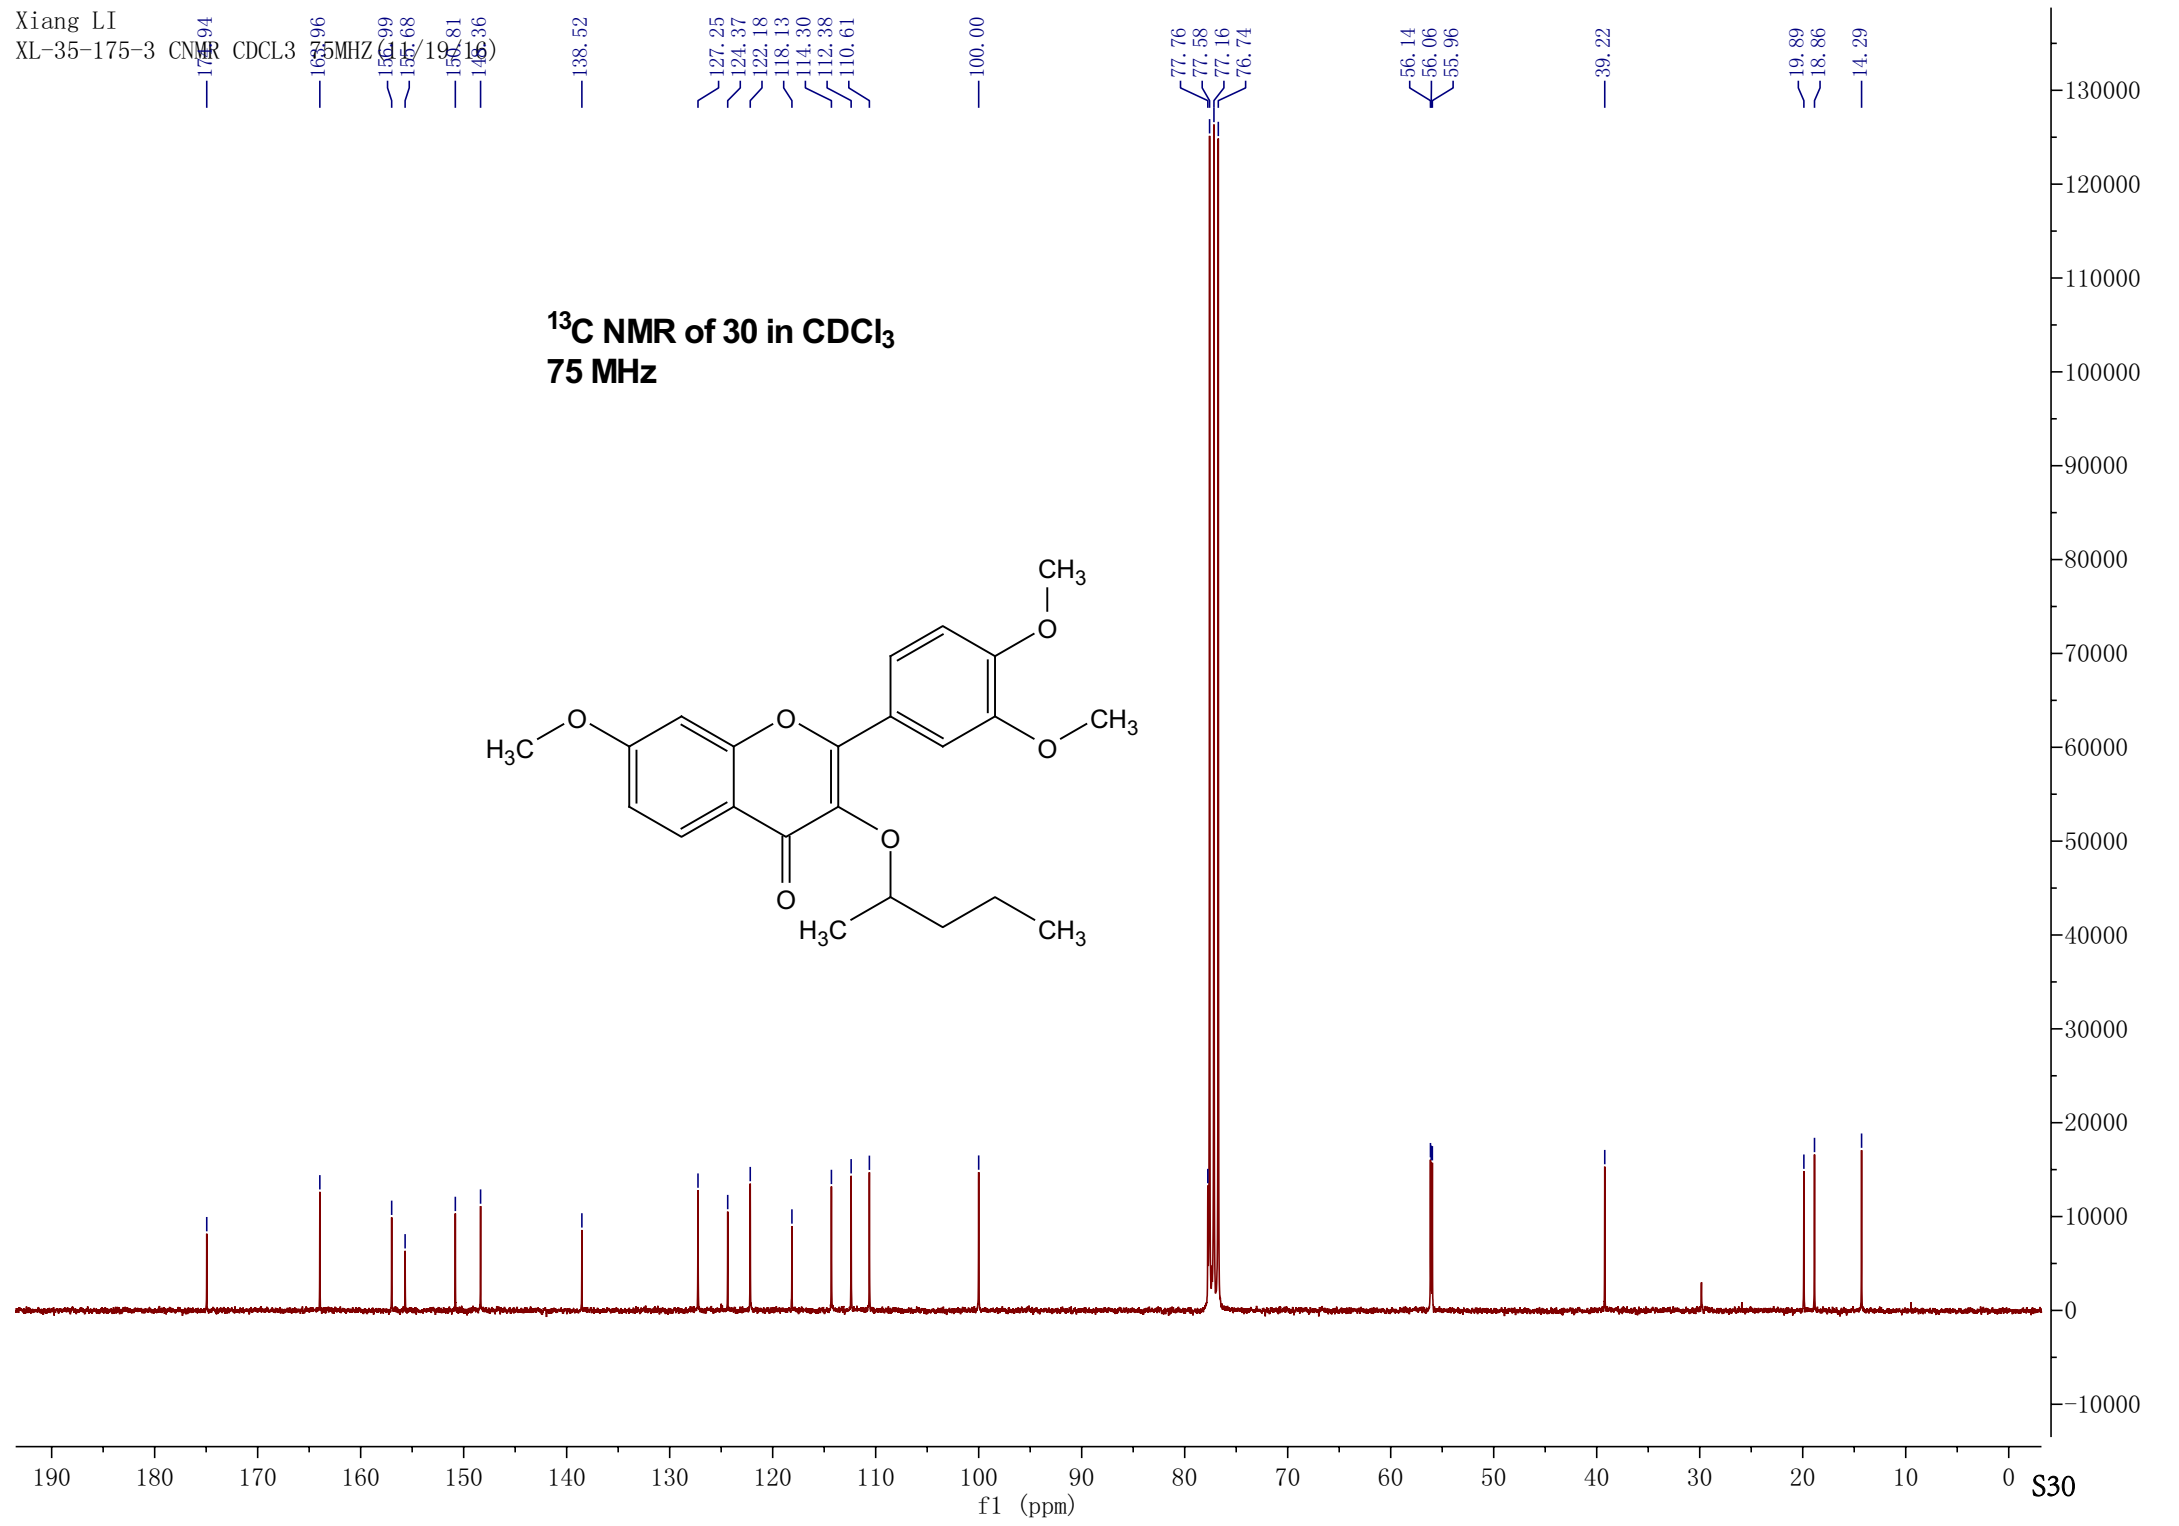

**<sup>1</sup>H NMR of 36 in CDCl<sub>3</sub>  
300 MHz**

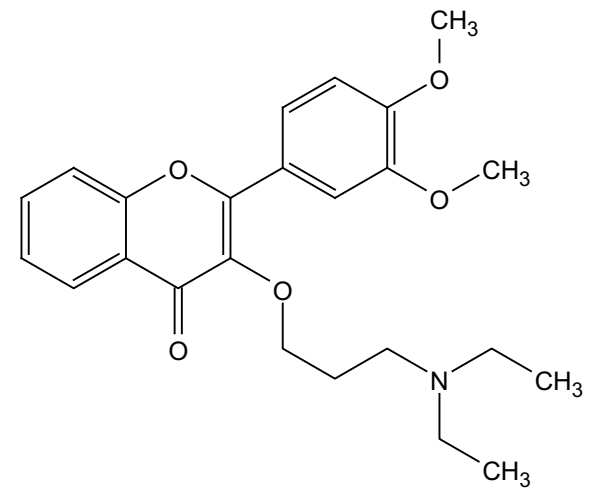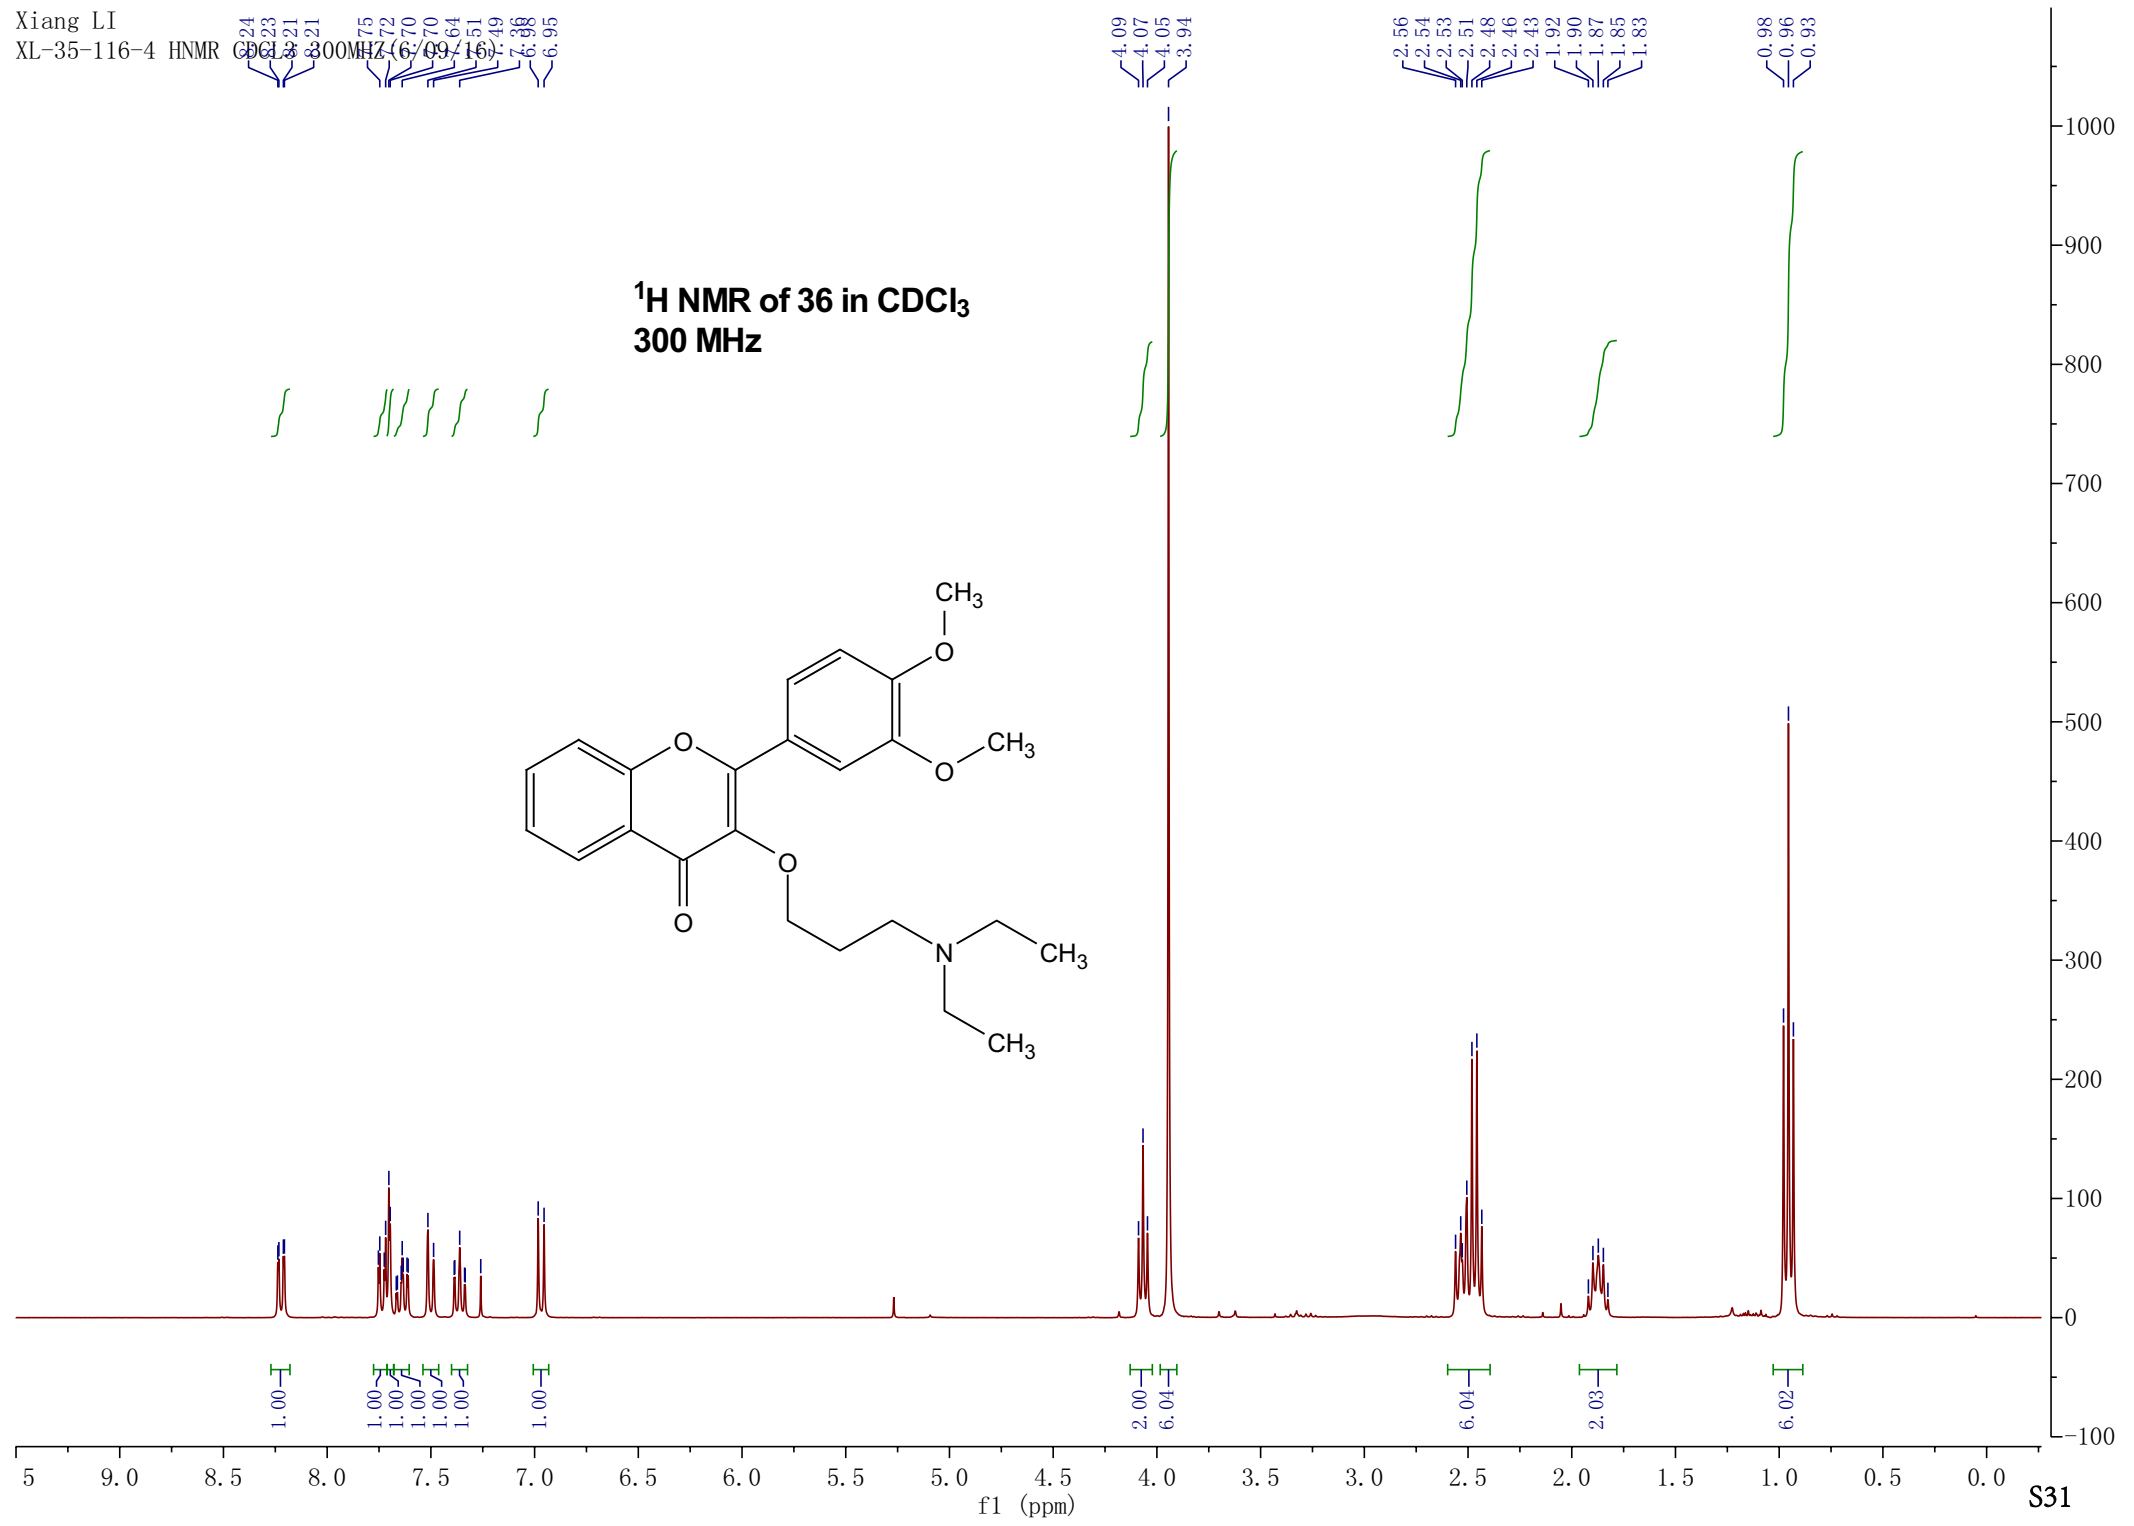

Xiang LI  
XL-35-116-4 CNMR-CDCL3 75MHZ (6/10/16)

**<sup>13</sup>C NMR of 36 in CDCl<sub>3</sub>  
75 MHz**

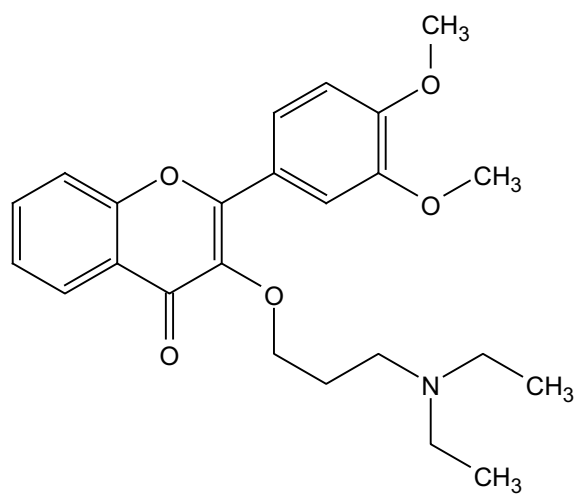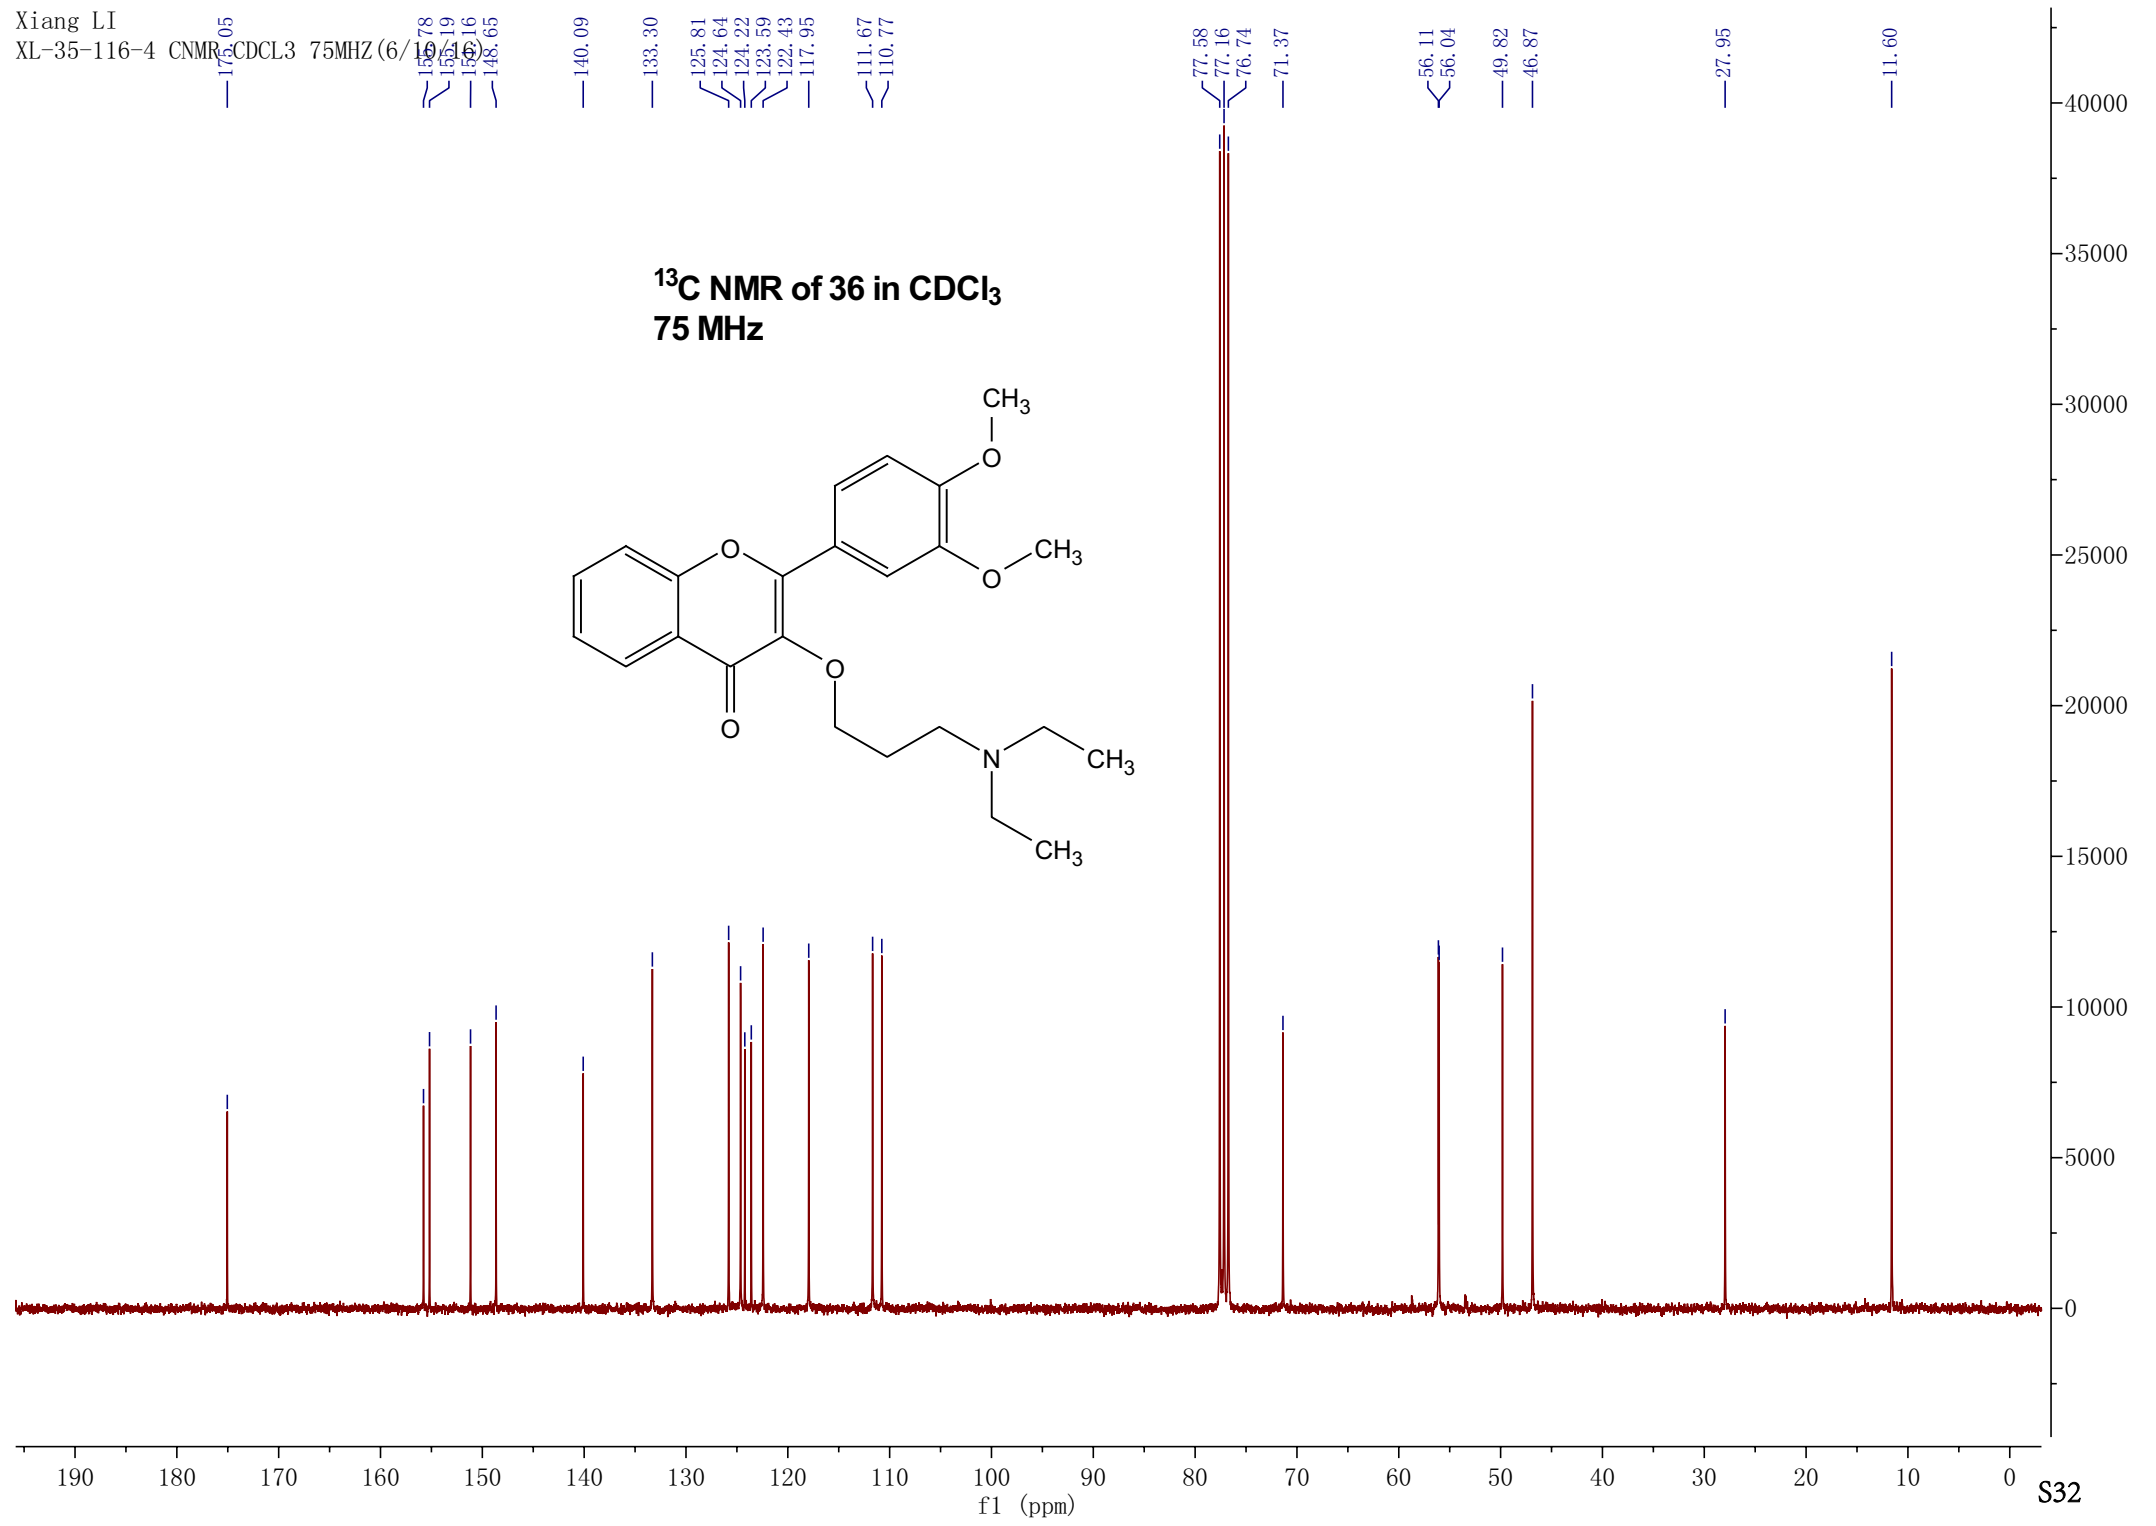

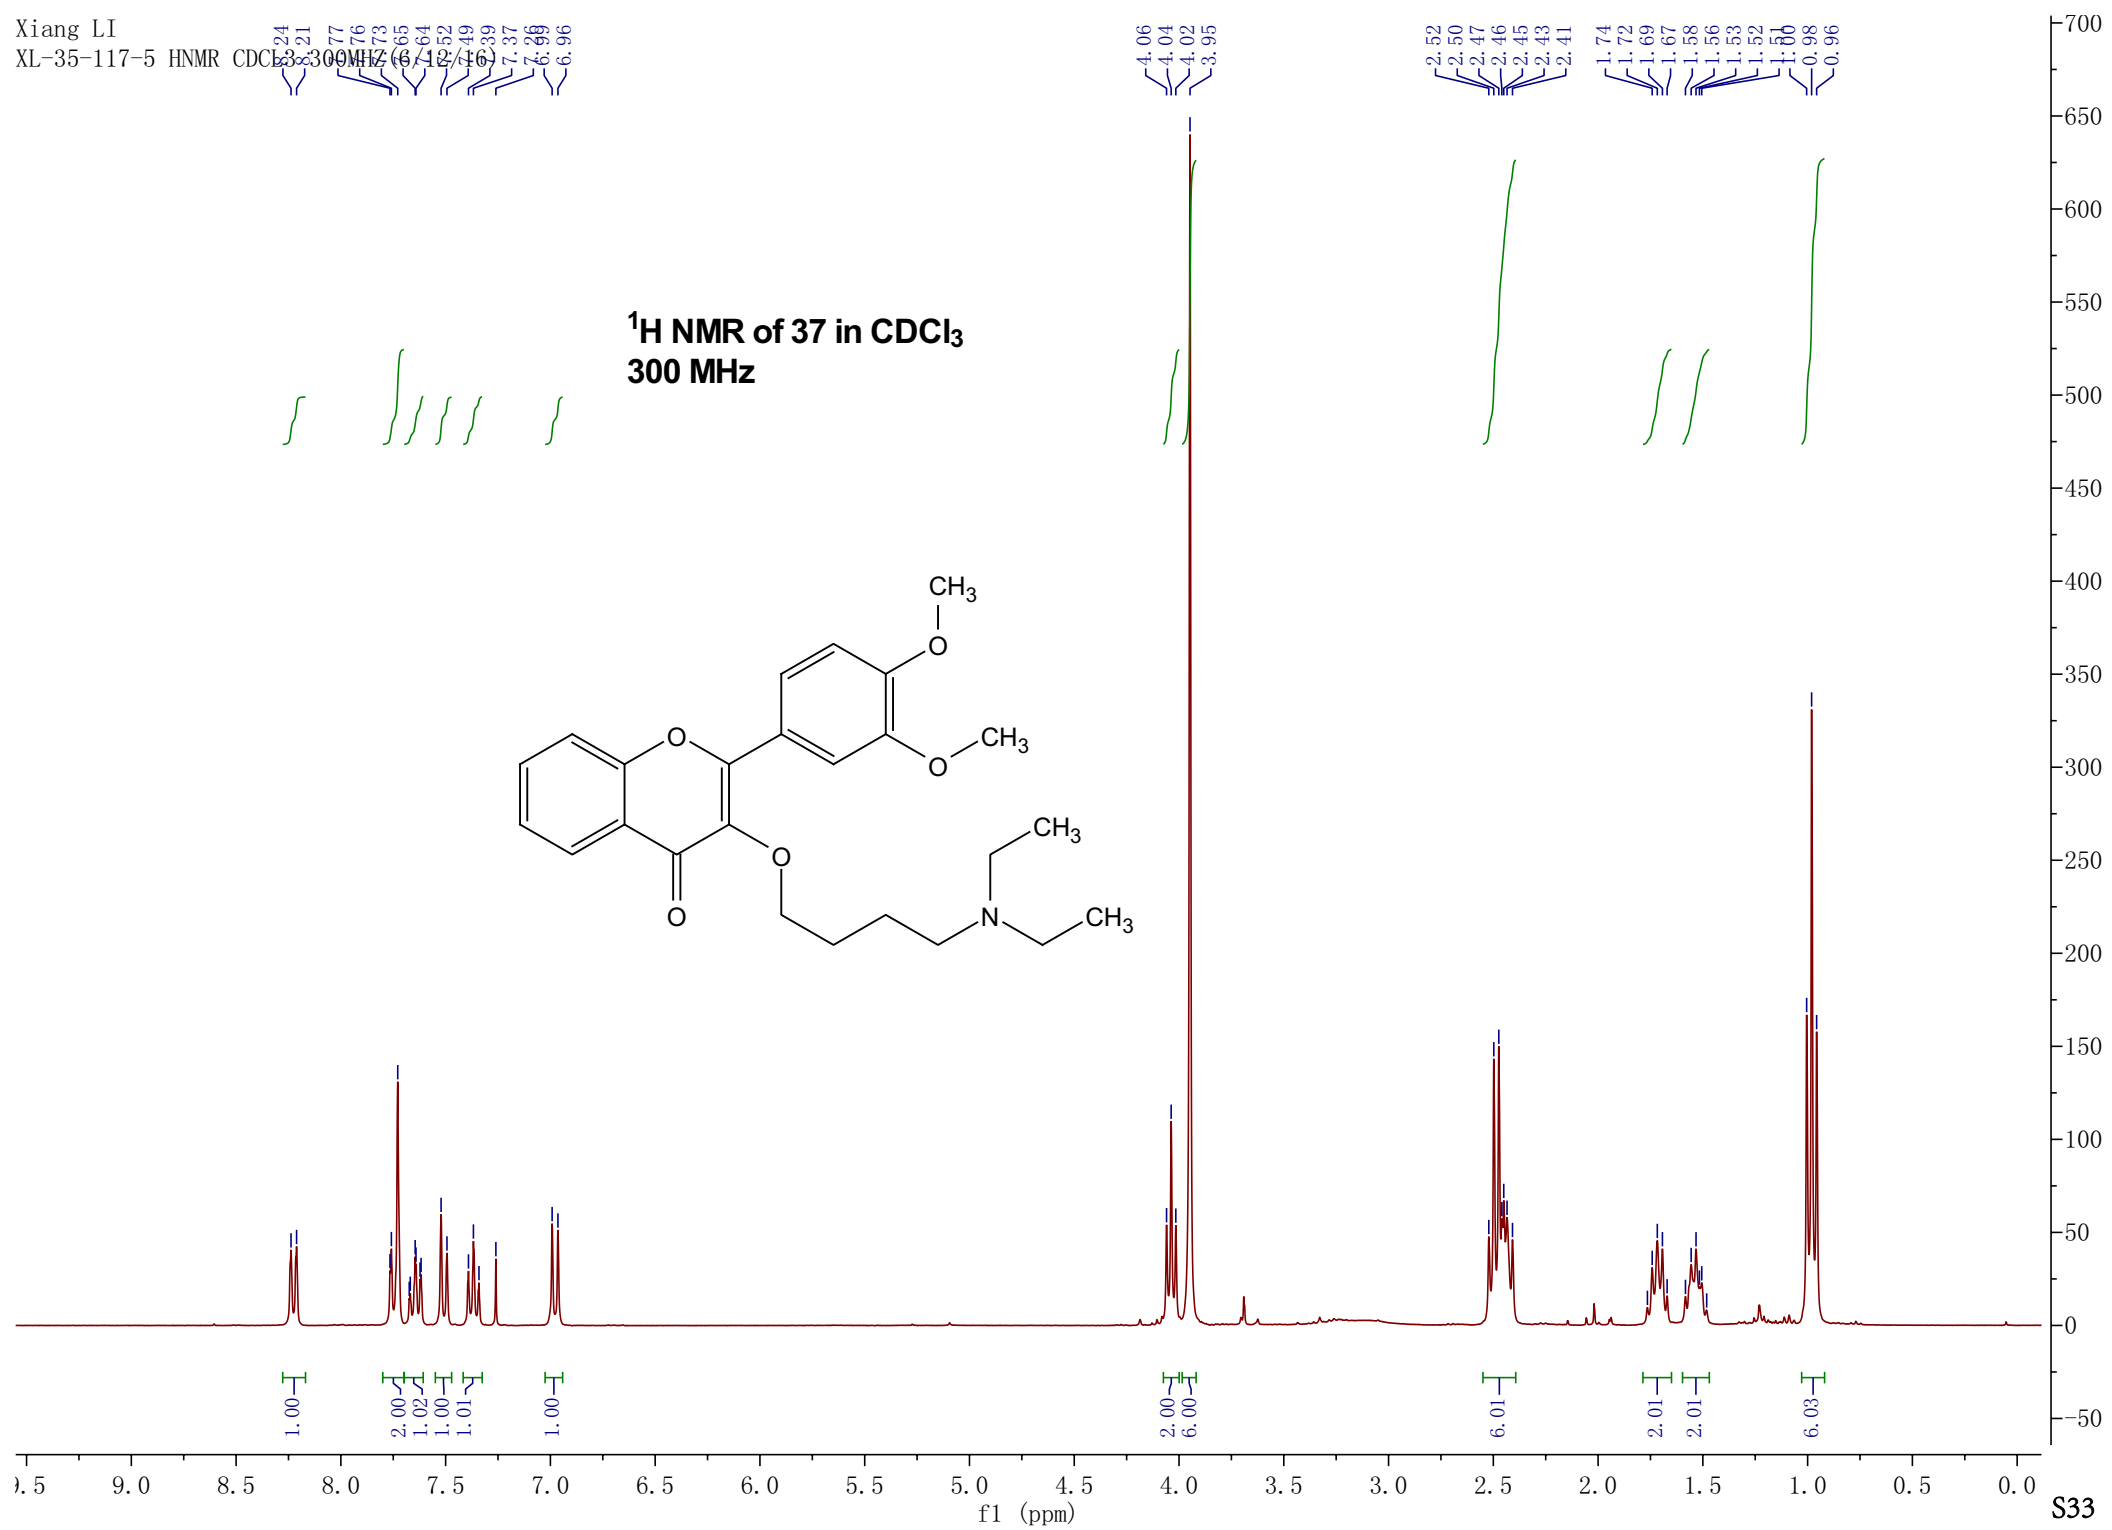

Xiang LI

XL-35-117-5 NMR CDCL3 75MHZ

**<sup>13</sup>C NMR of 37 in CDCl<sub>3</sub>  
75 MHz**

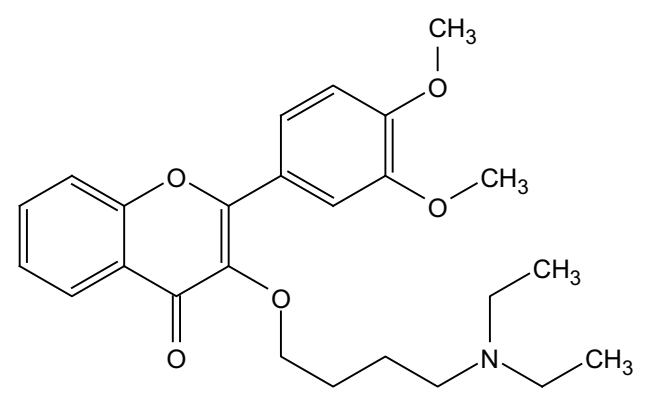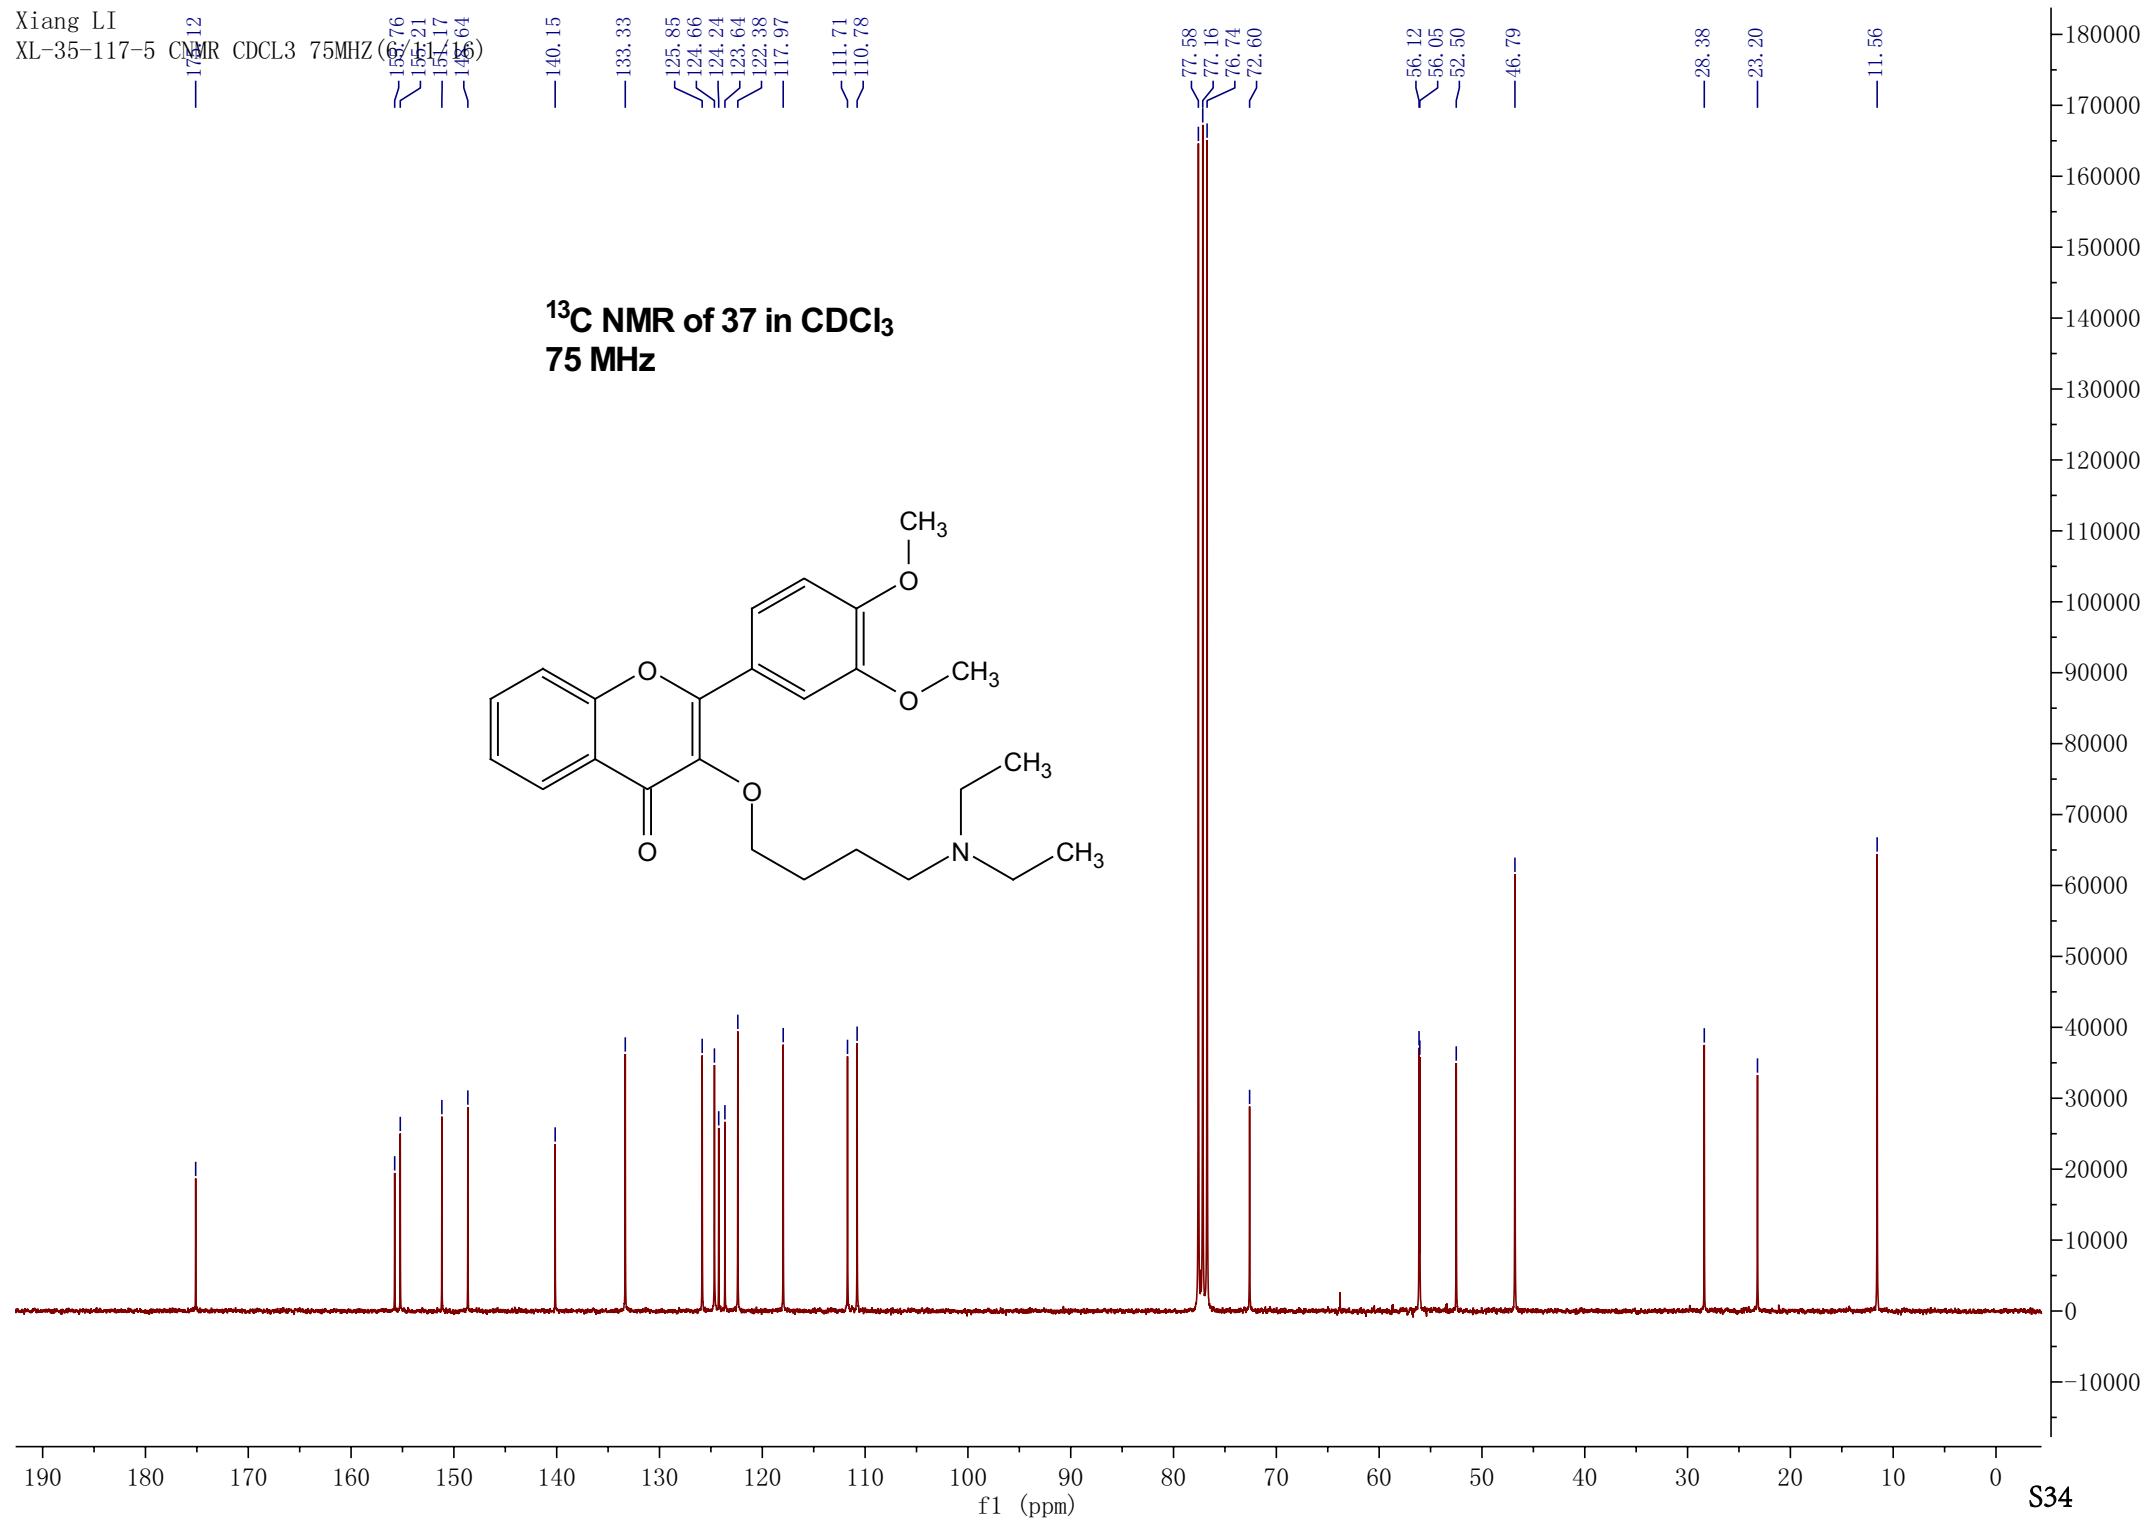

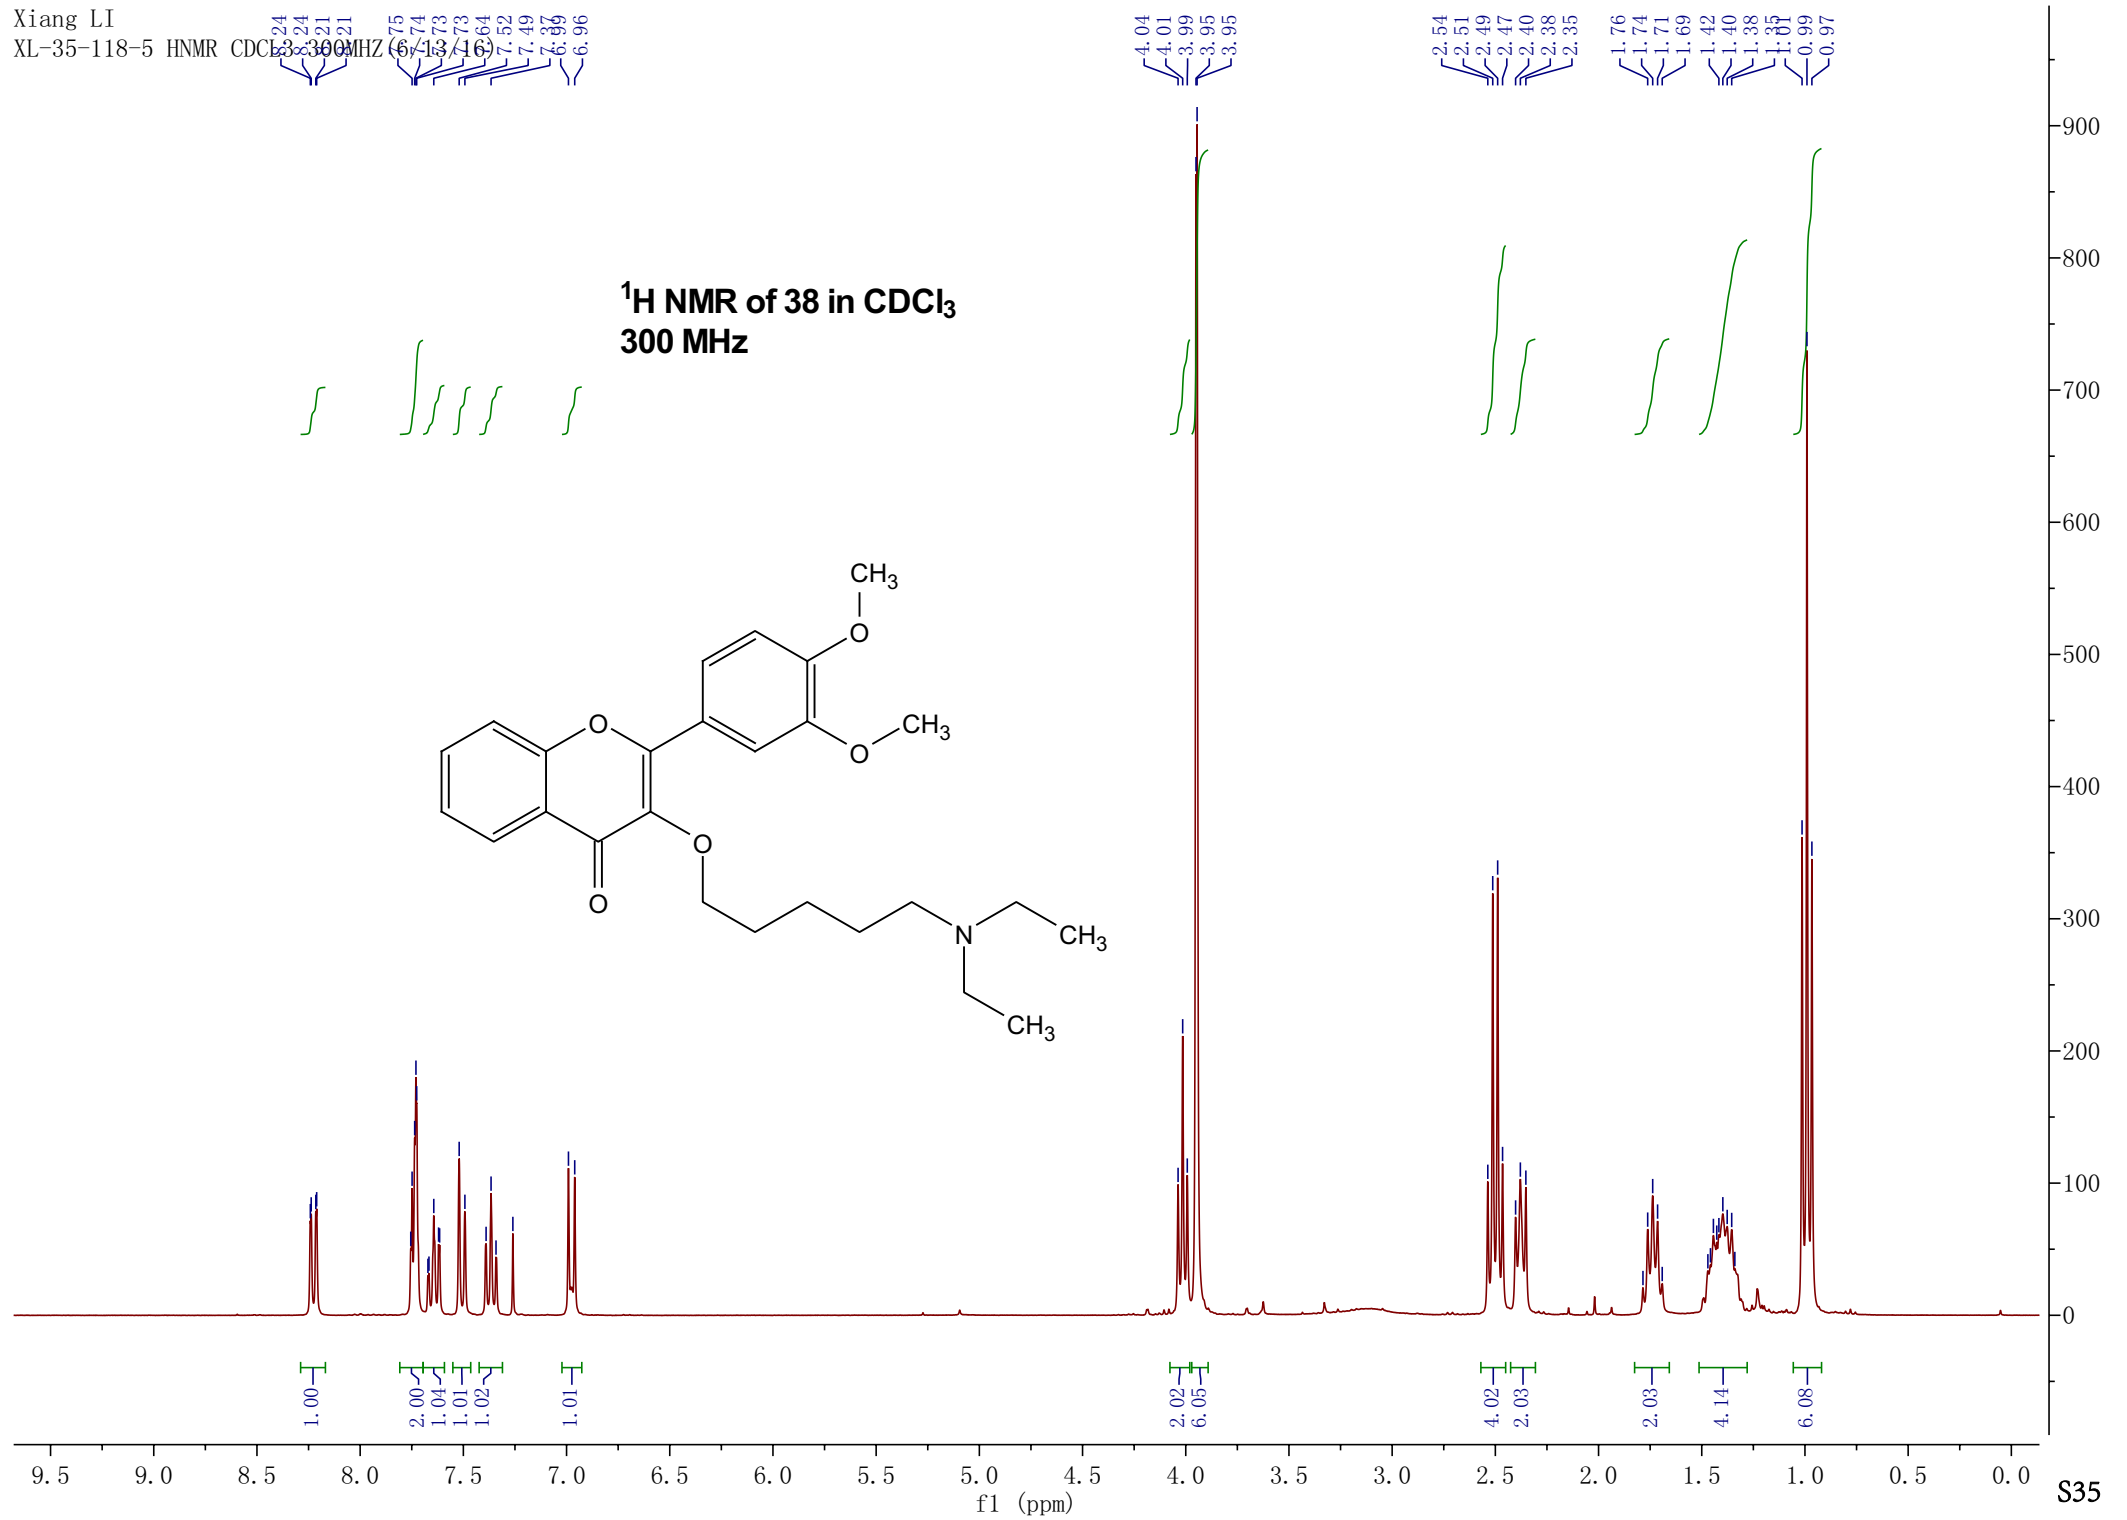

Xiang LI

XL-35-118-5 NMR

CDCL<sub>3</sub>

75MHz (6)

155.76

151.22

151.15

148.62

140.18

133.32

125.85

124.65

124.25

123.66

122.32

117.97

111.76

110.76

77.58

77.16

76.74

72.69

56.11

56.05

52.74

46.86

30.25

26.55

24.11

11.53

**<sup>13</sup>C NMR of 38 in CDCl<sub>3</sub>**  
**75 MHz**

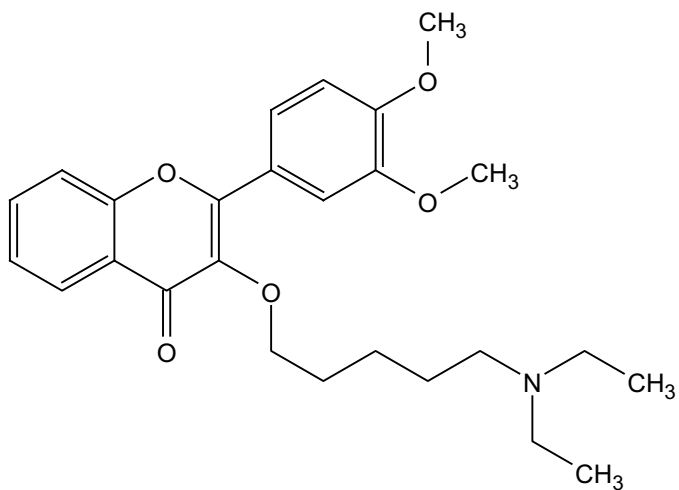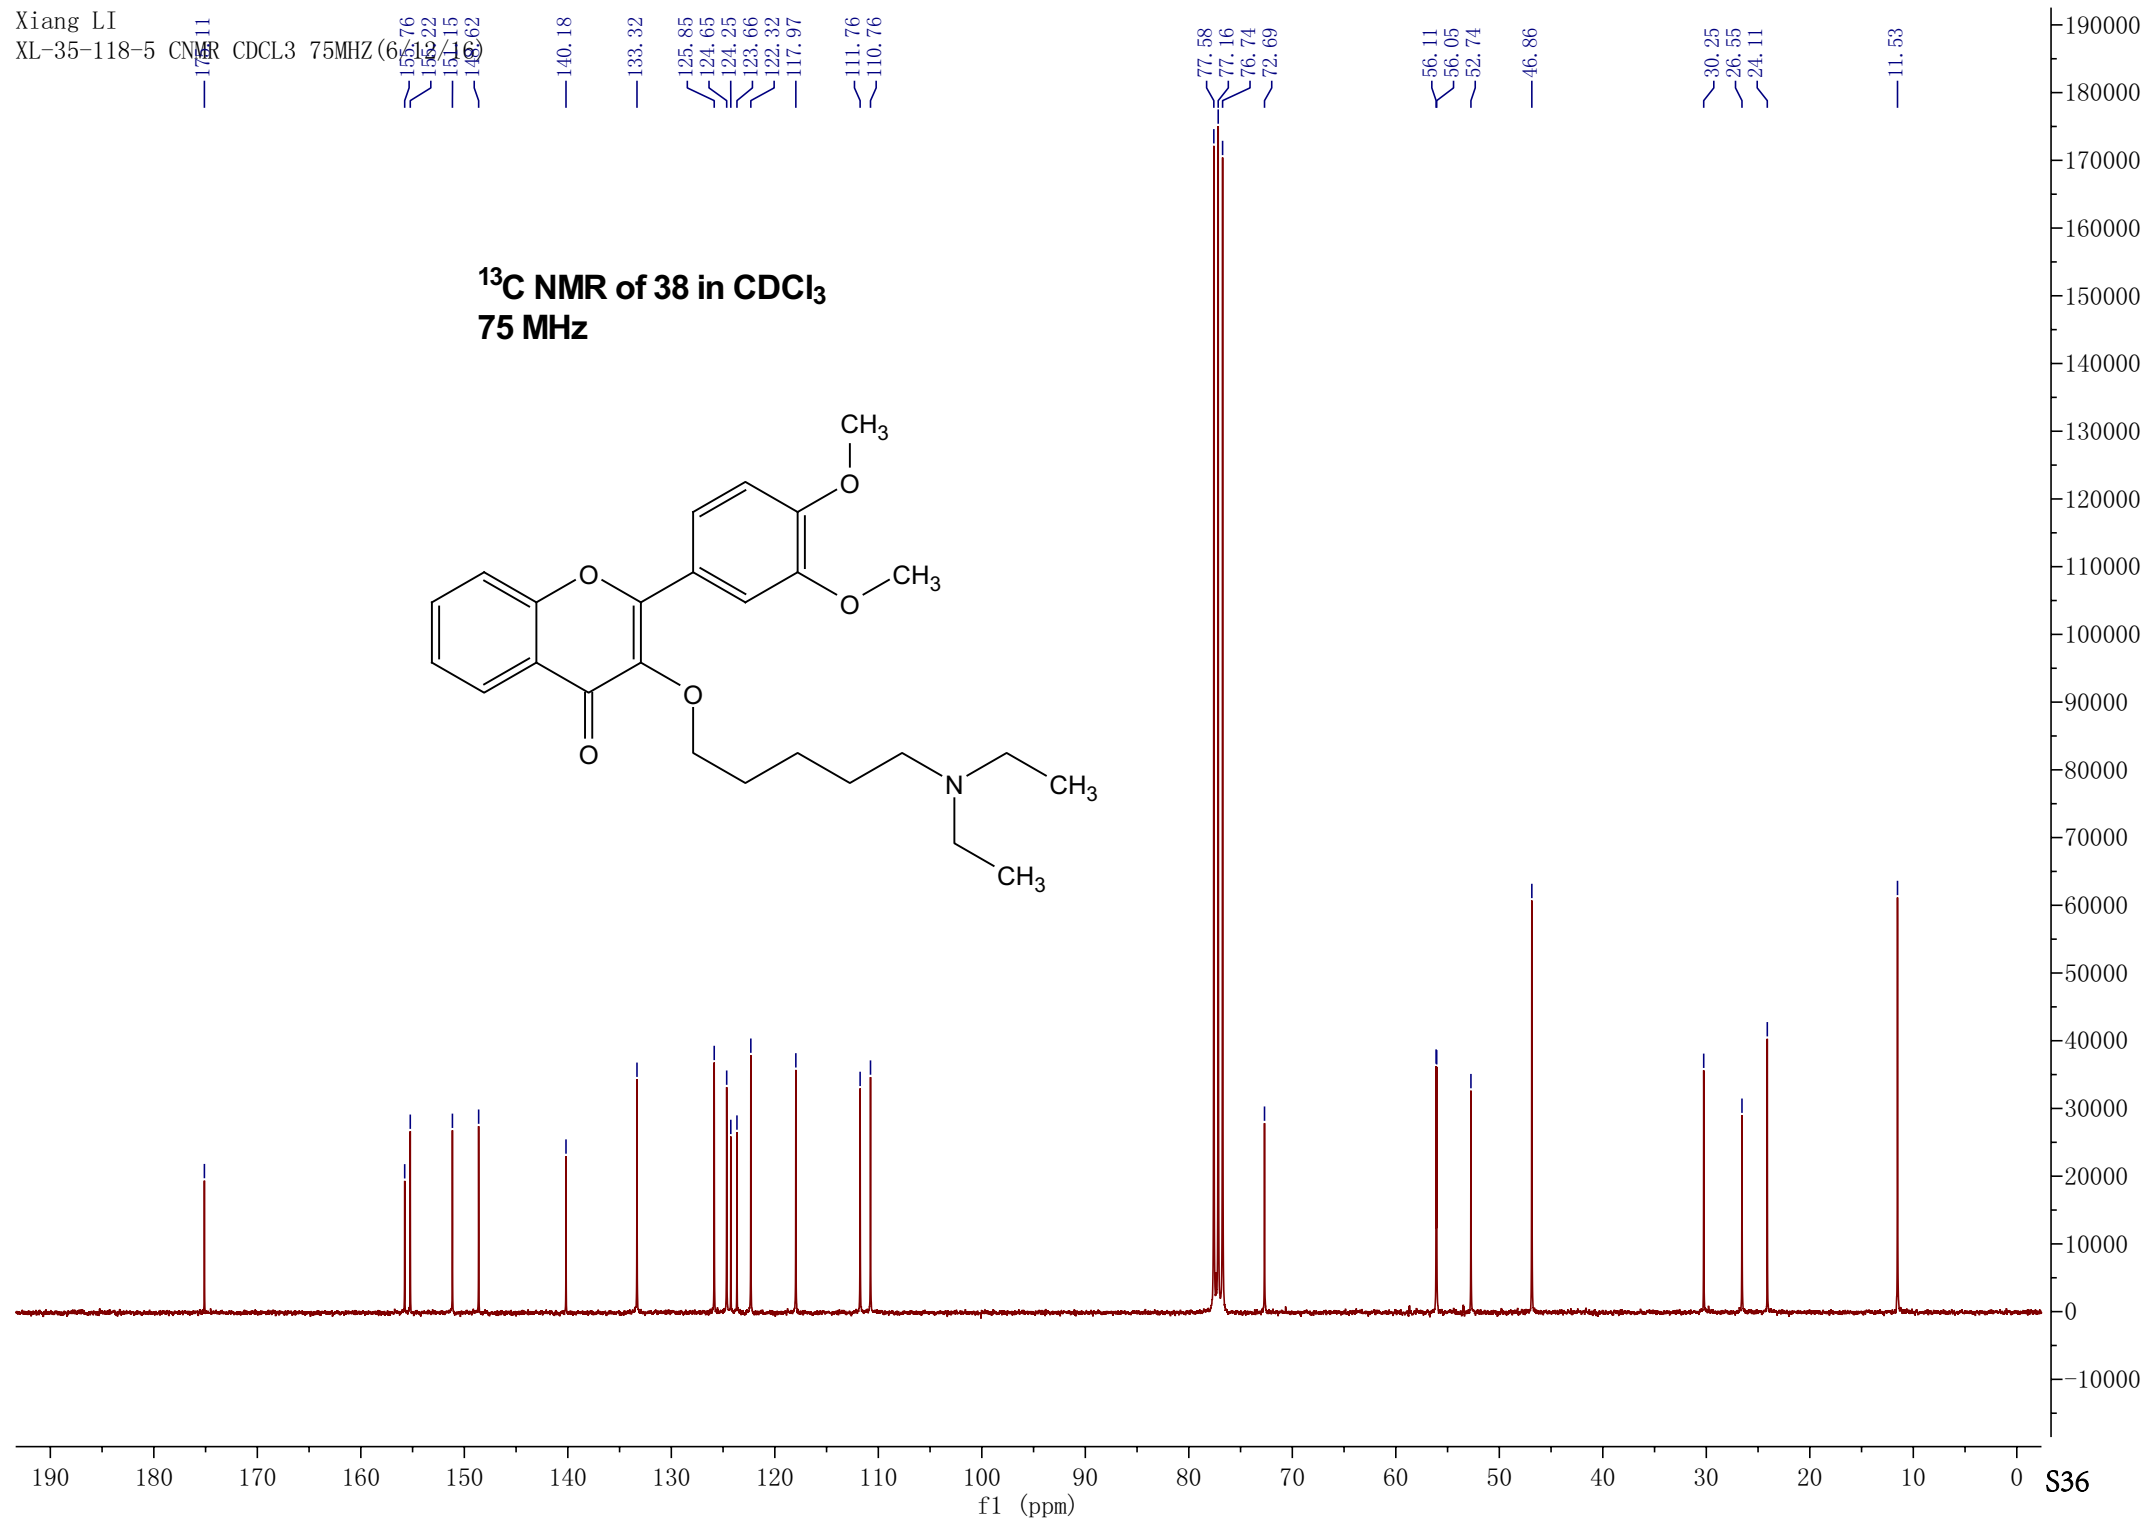



Xiang LI

XL-35-135-5 HNMR CDCl<sub>3</sub> 300MHZ (7.21, 16)

7.25  
7.23  
7.22  
7.16  
7.13  
7.11  
7.10  
7.06  
7.04  
7.01  
6.98

4.10  
4.07  
4.05  
3.96

2.63  
2.42  
2.40  
2.38  
1.97  
1.95  
1.92  
1.90  
1.88  
1.50  
1.47  
1.45  
1.42  
1.40  
1.38  
0.86  
0.83  
0.81

**<sup>1</sup>H NMR of 39 in CDCl<sub>3</sub>  
300 MHZ**

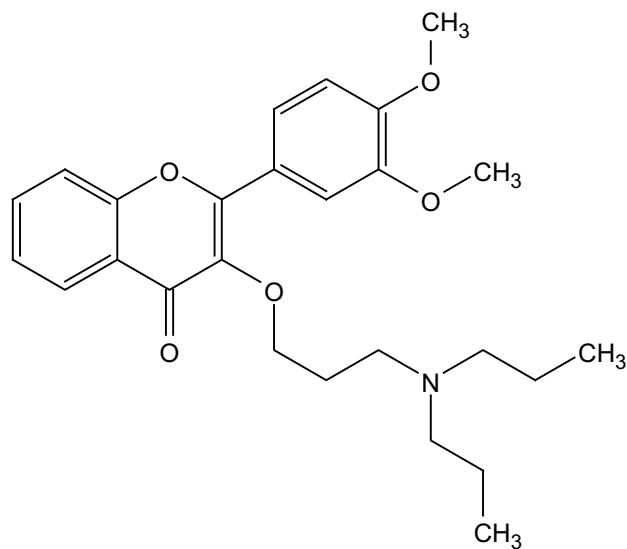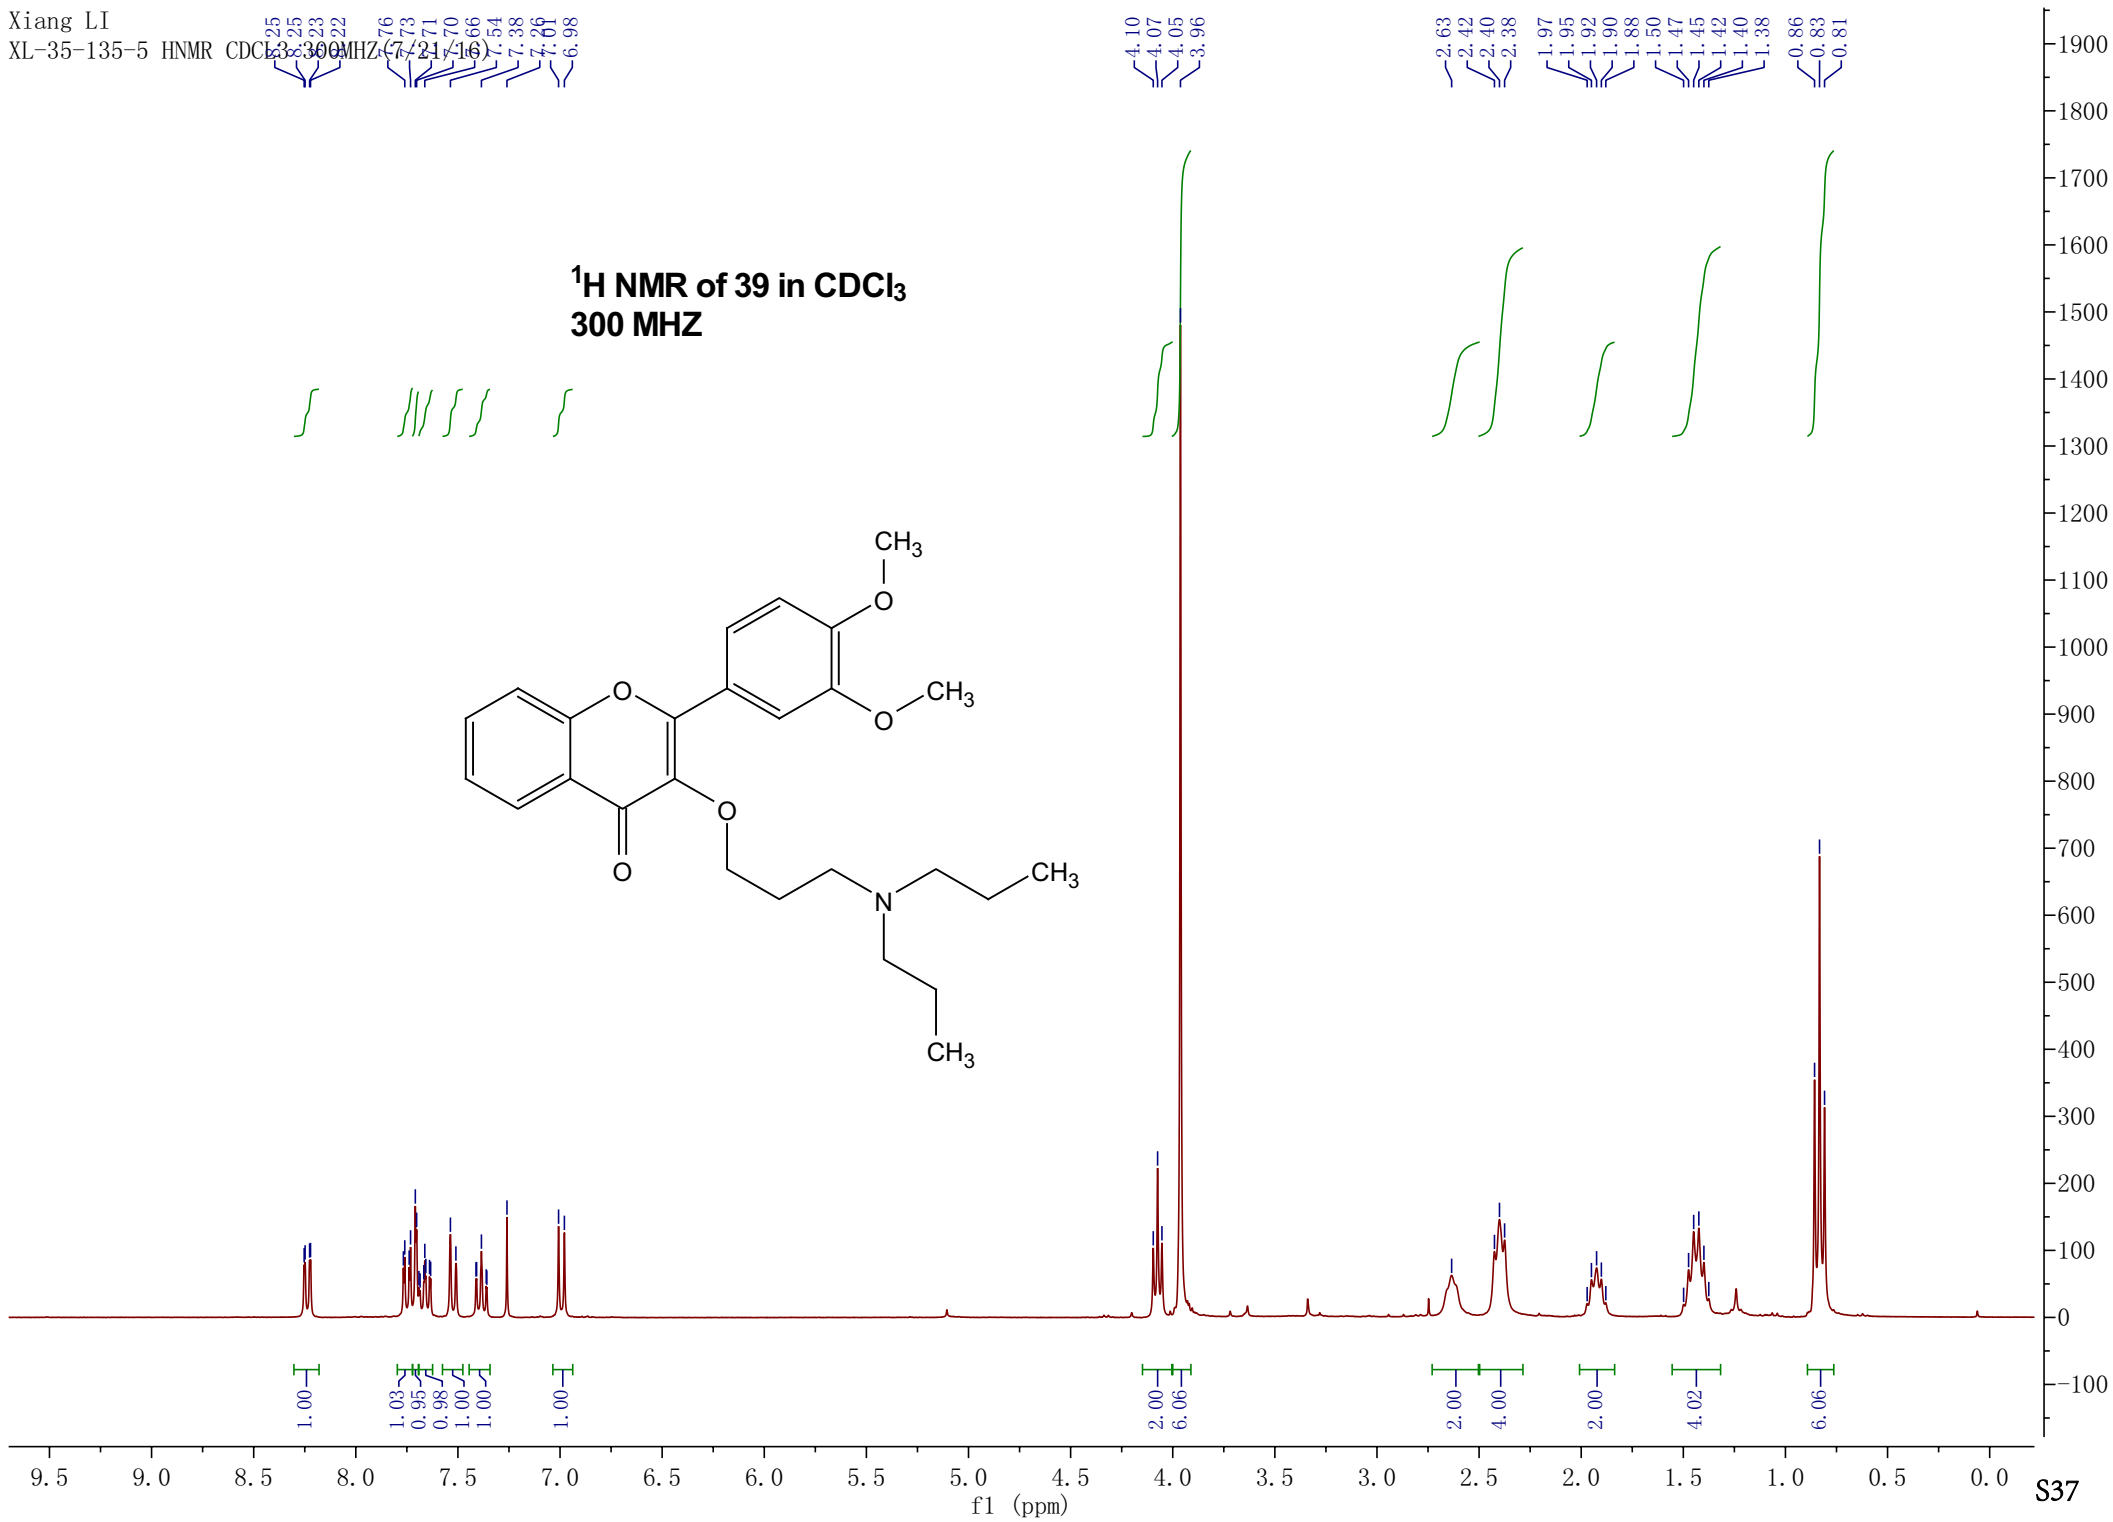

**<sup>13</sup>C NMR of 39 in CDCl<sub>3</sub>  
300 MHZ**

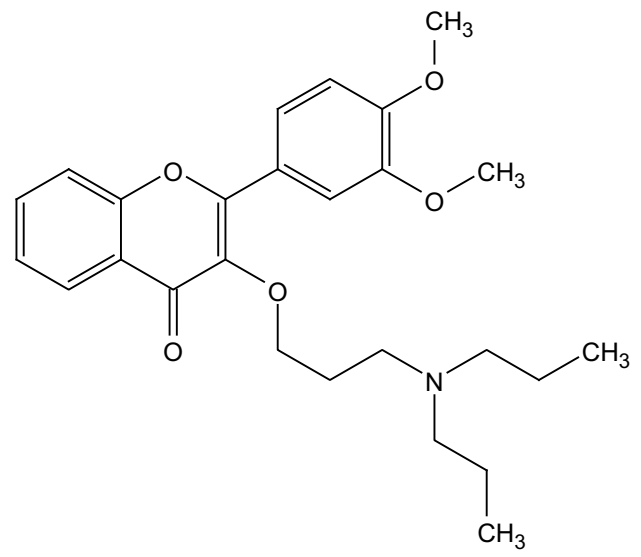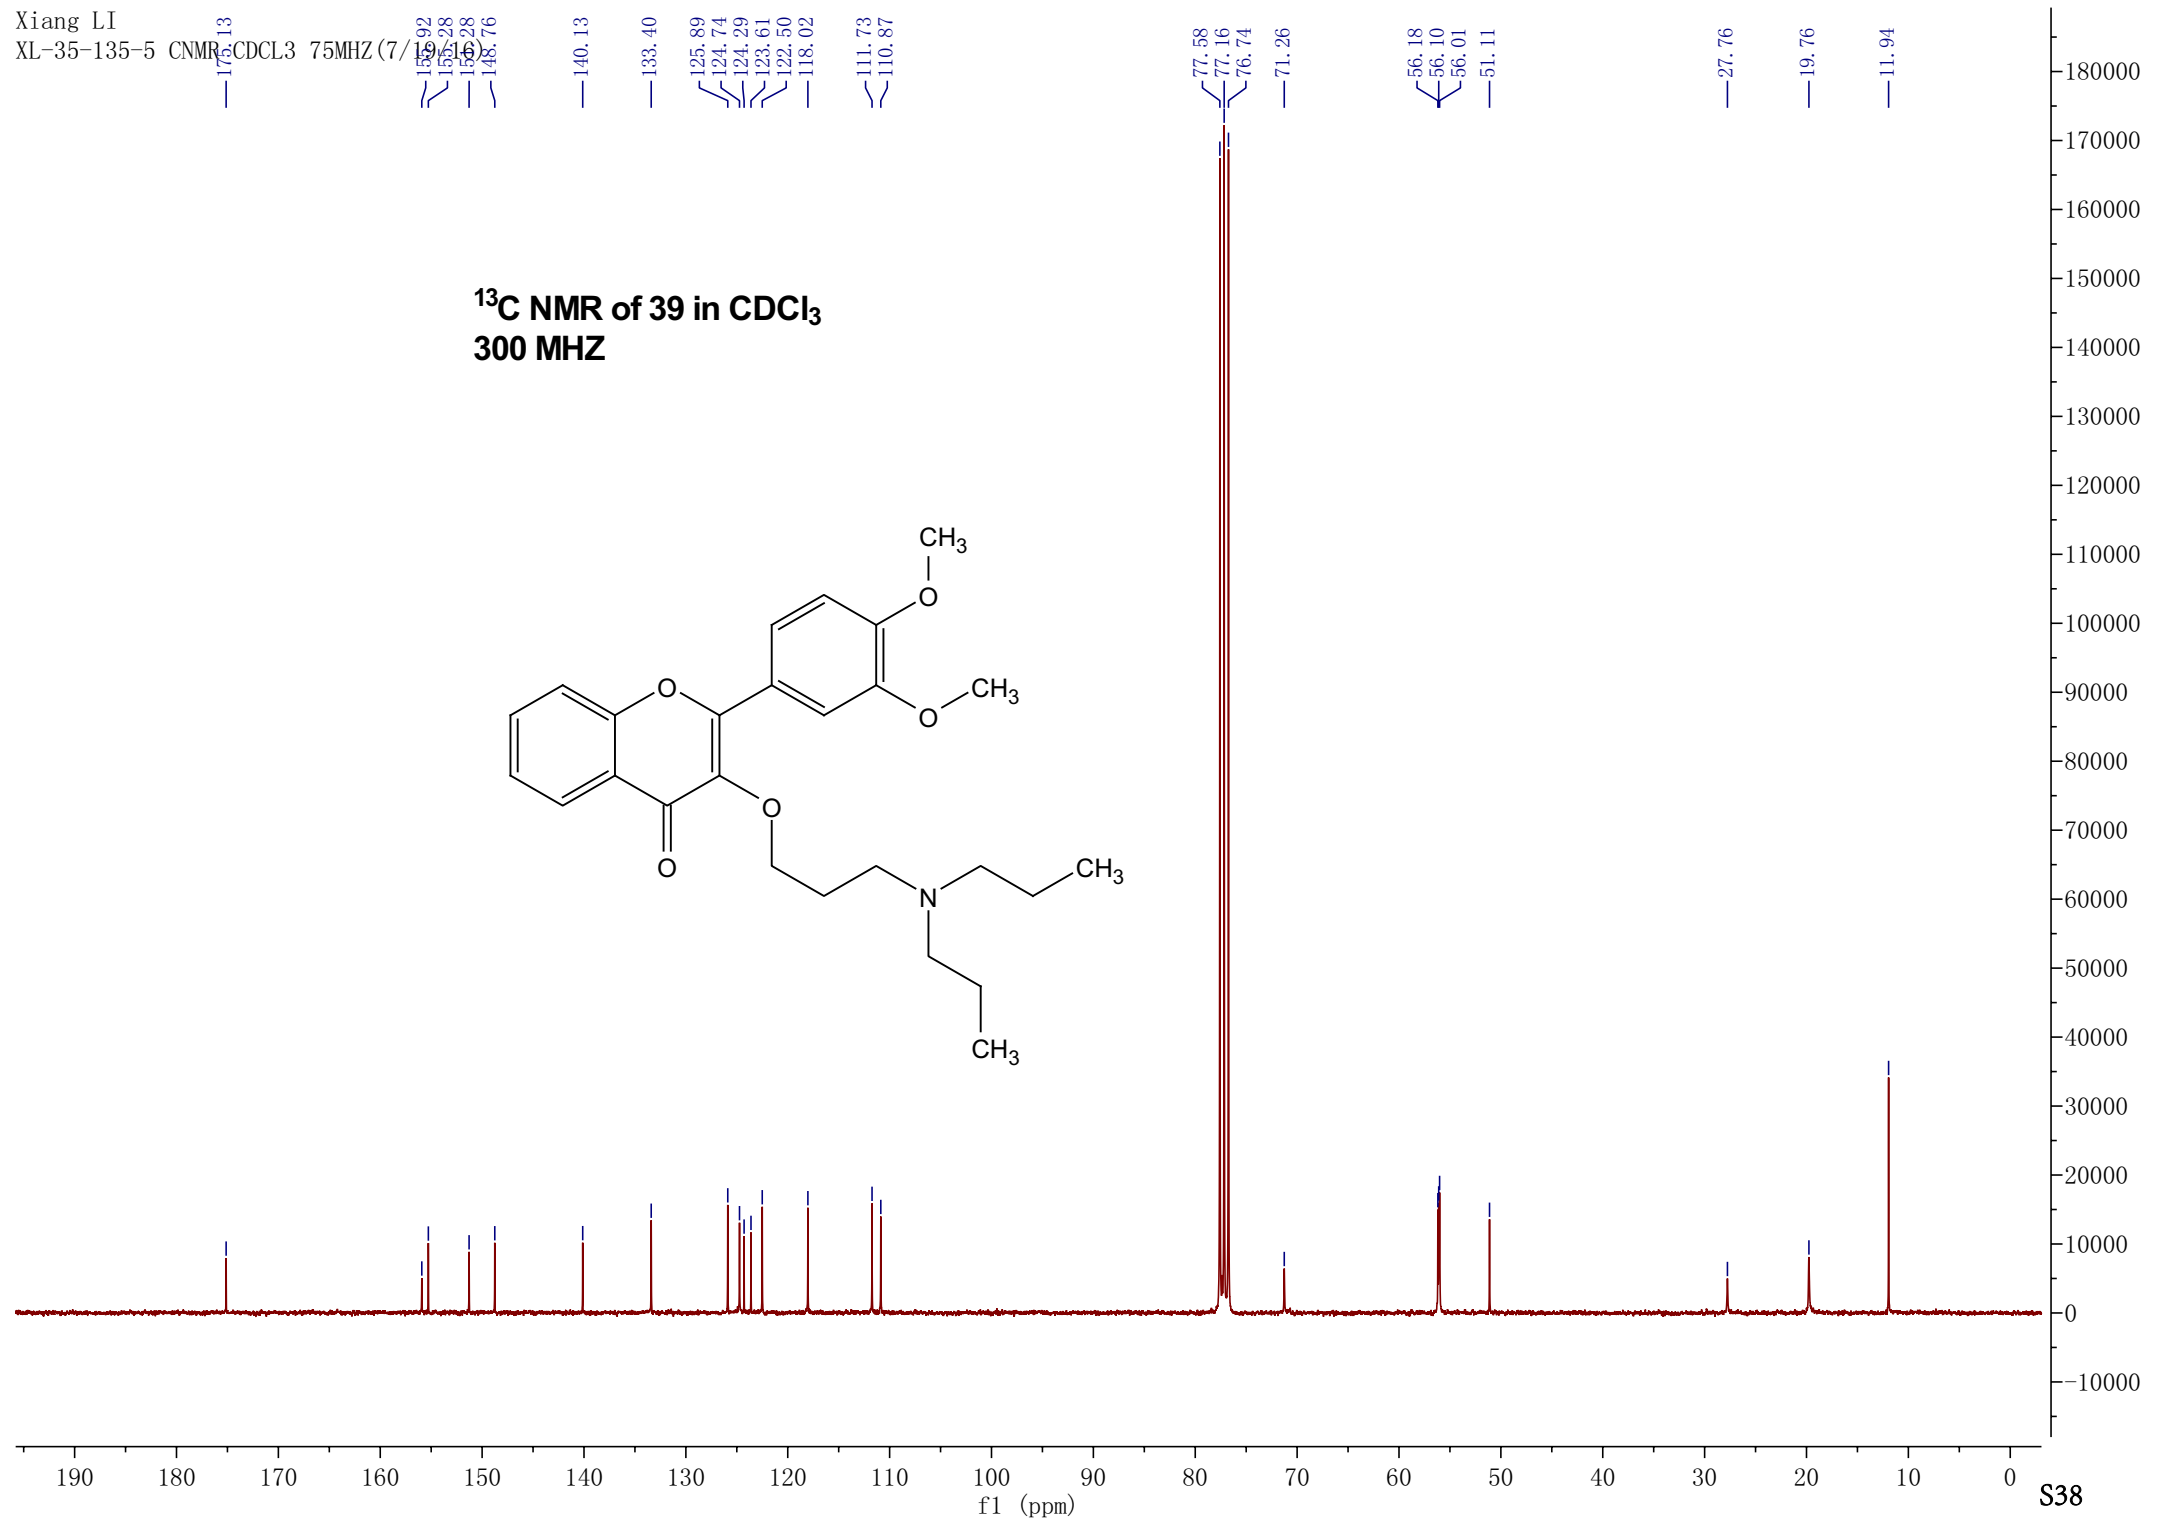

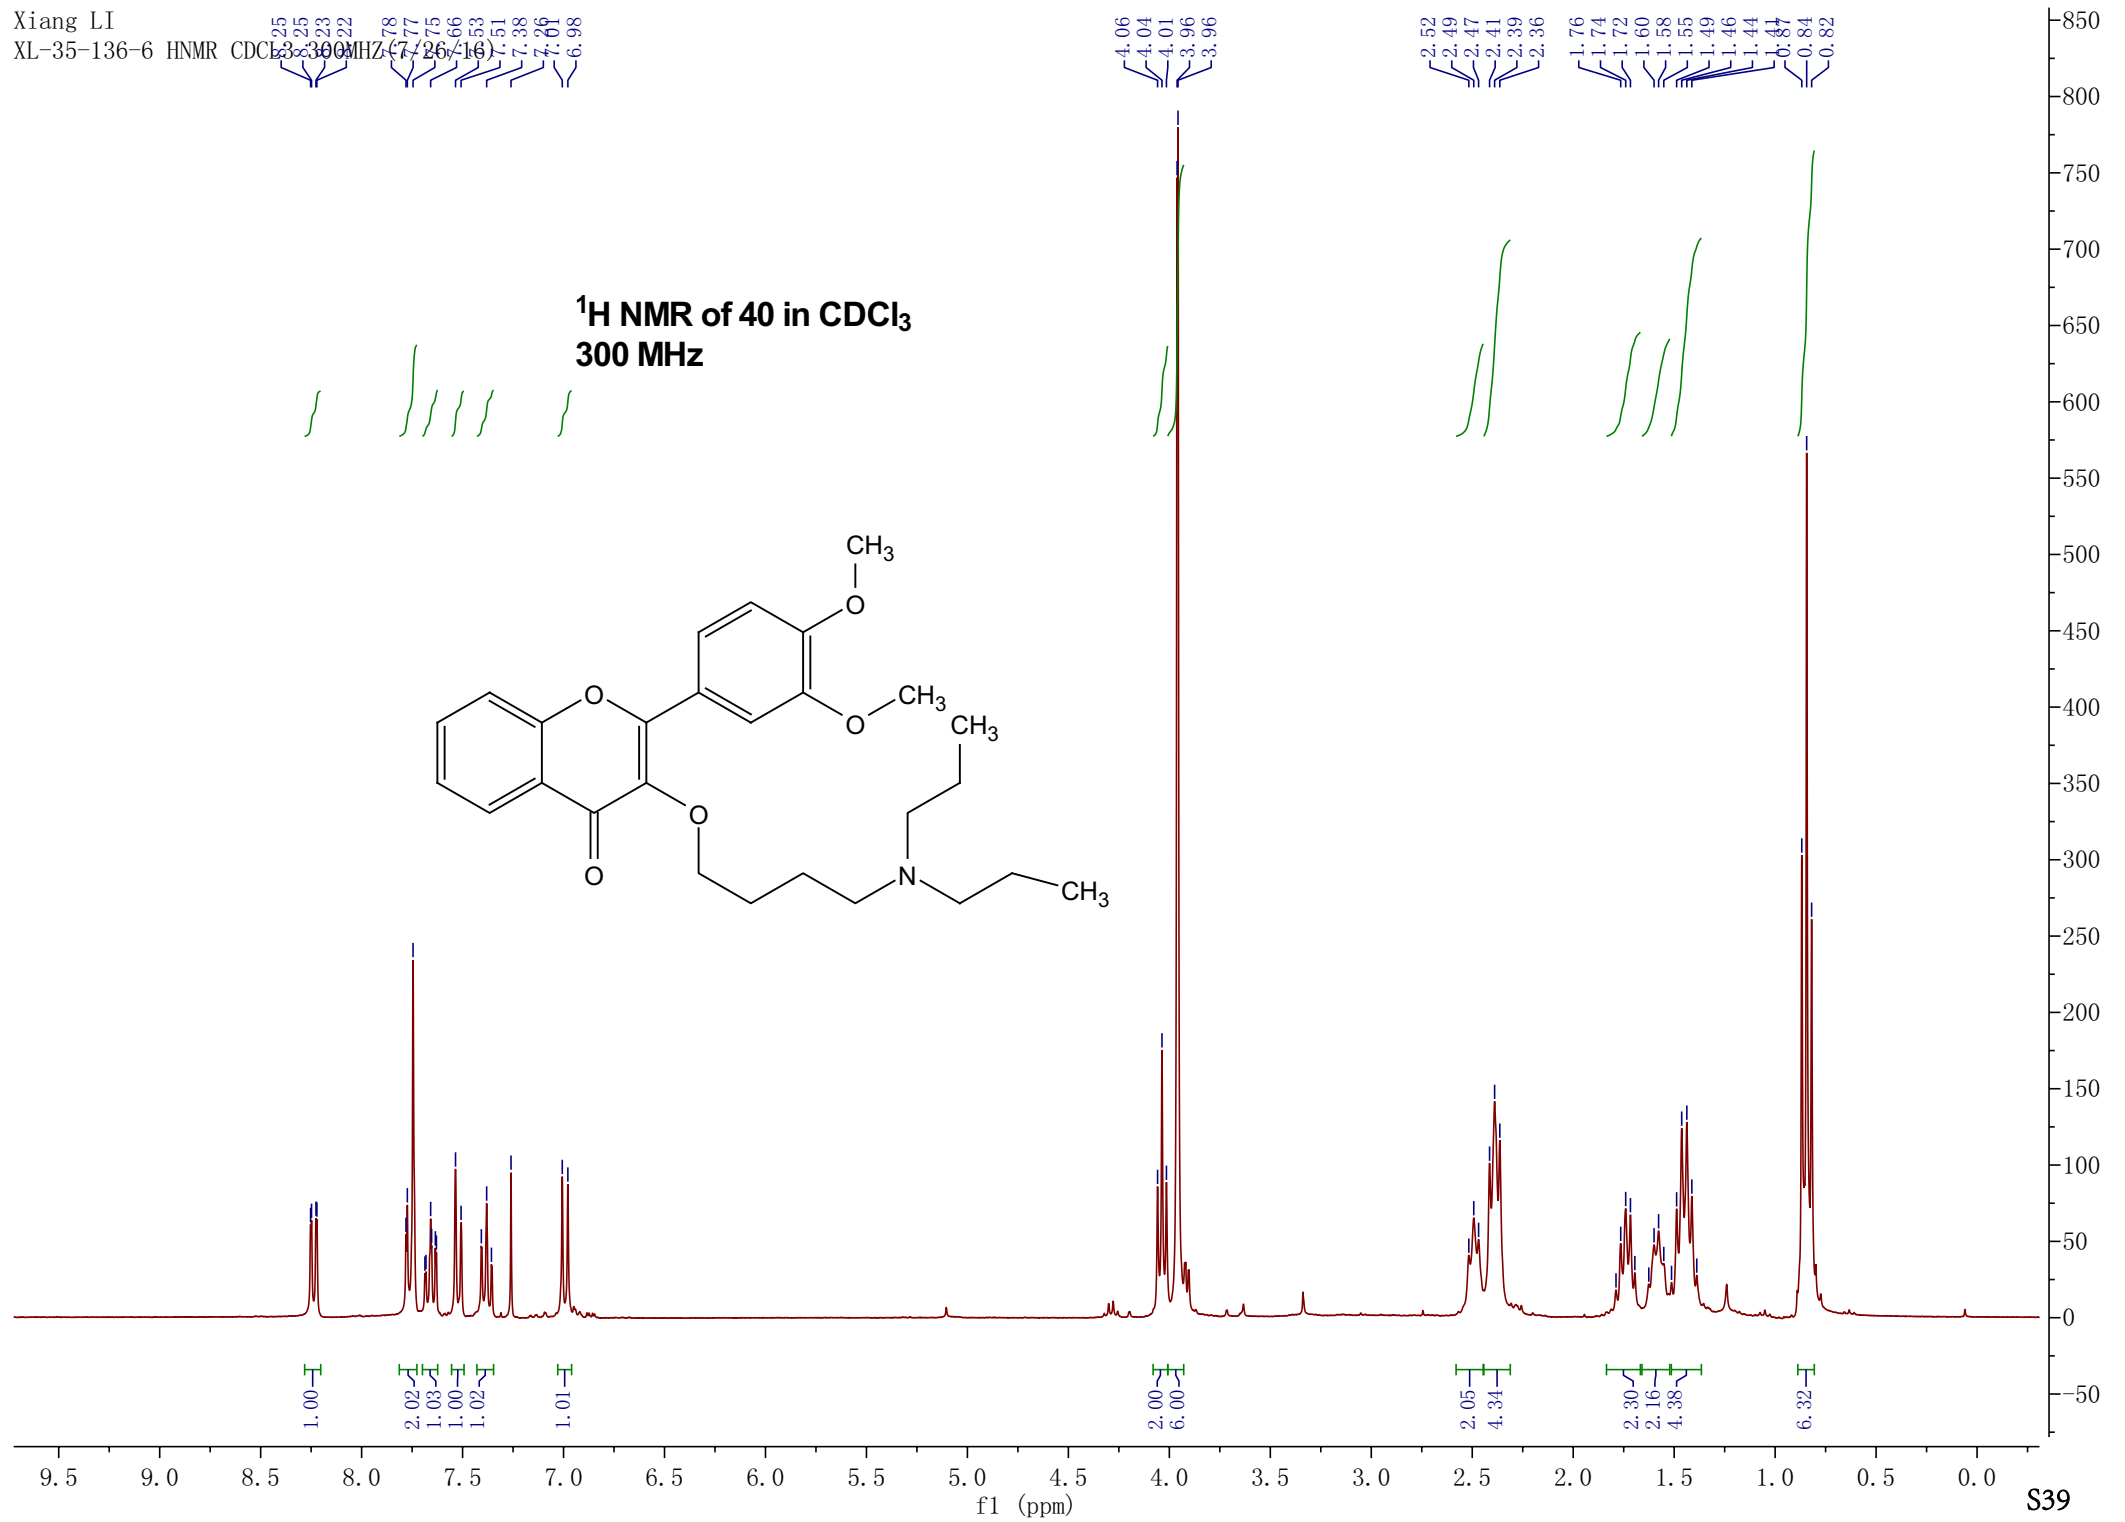

Xiang LI  
XL-35-136-6 CNMR CDCL3 75MHZ (7)

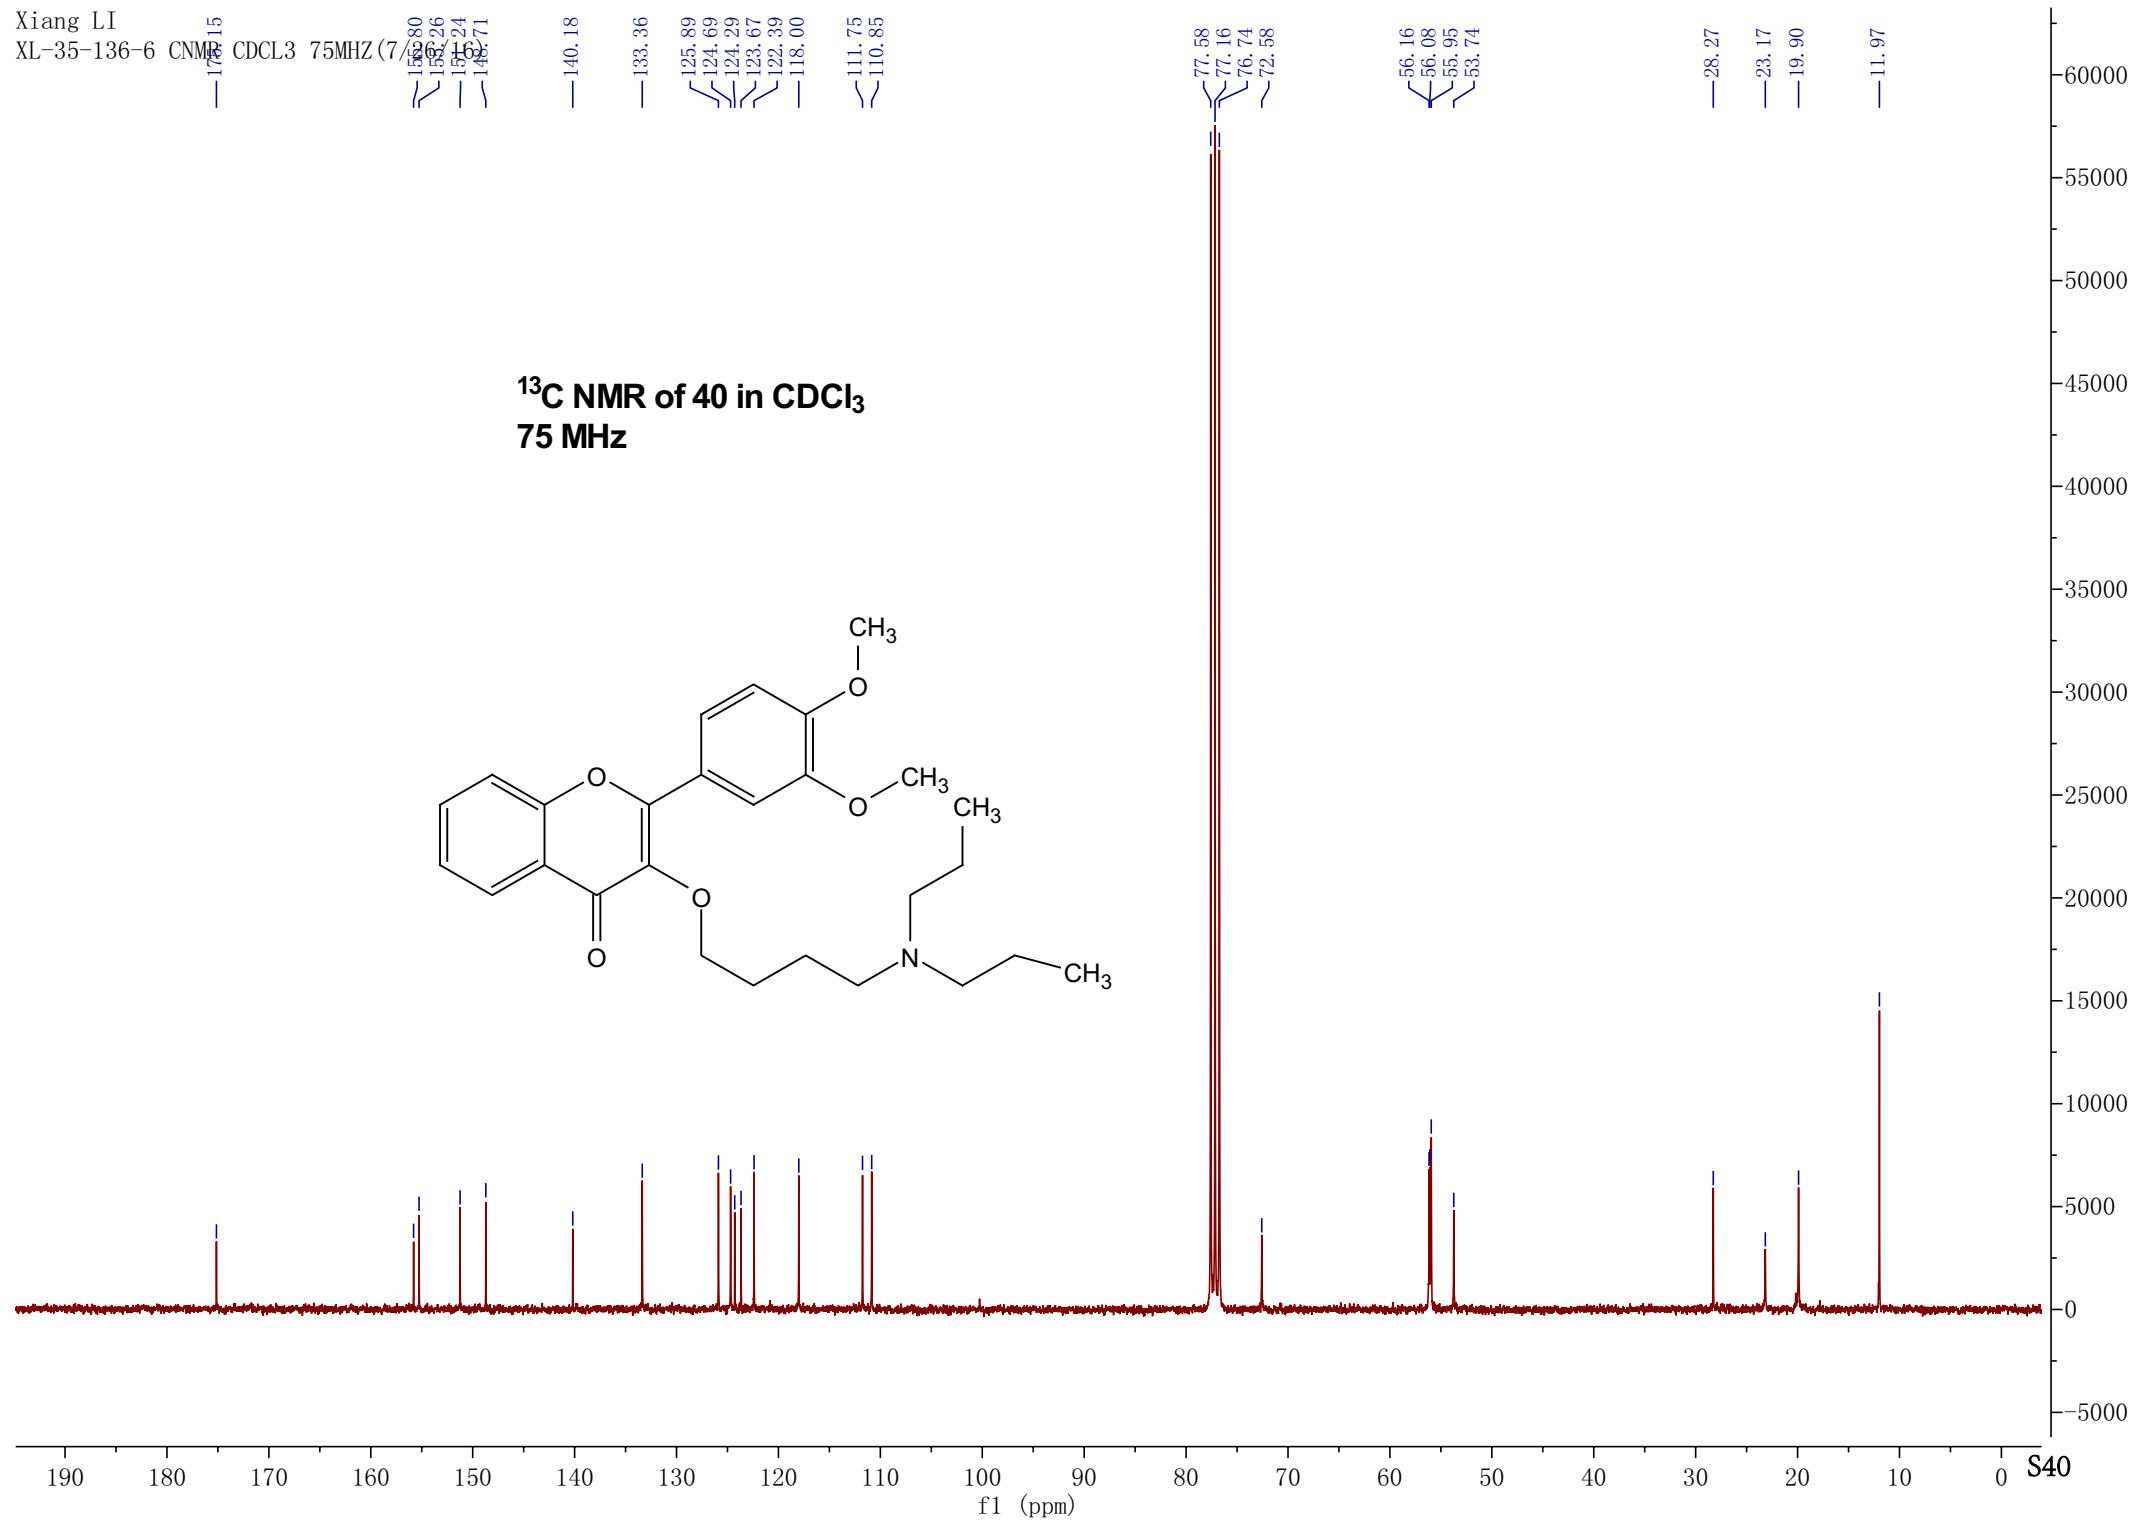

**<sup>13</sup>C NMR of 40 in CDCl<sub>3</sub>  
75 MHz**

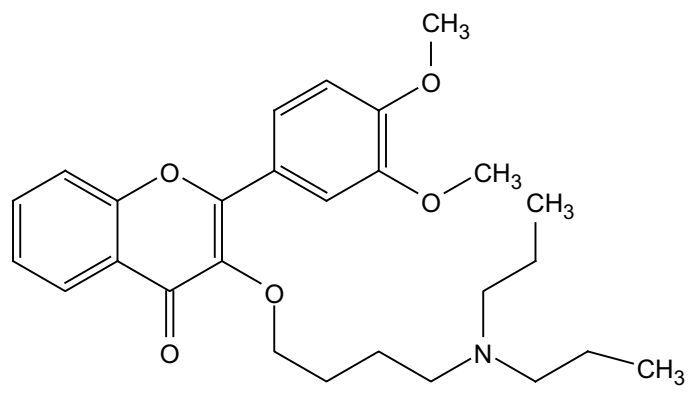

CDCl<sub>3</sub> 300MHz (7/28/16)  
8.25  
8.23  
8.22  
7.76  
7.75  
7.74  
7.74  
7.65  
7.53  
7.38  
7.66  
6.97

4.05  
4.03  
4.01  
3.96  
3.95

2.41  
2.39  
2.36  
2.34

1.77  
1.74  
1.72  
1.47  
1.45  
1.42  
1.40  
1.40  
1.37  
0.87  
0.85  
0.82

**<sup>1</sup>H NMR of 41 in CDCl<sub>3</sub>  
300 MHz**

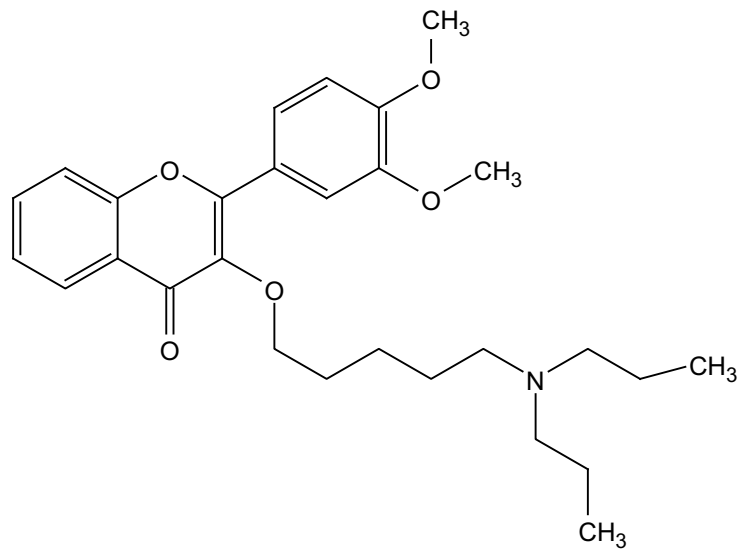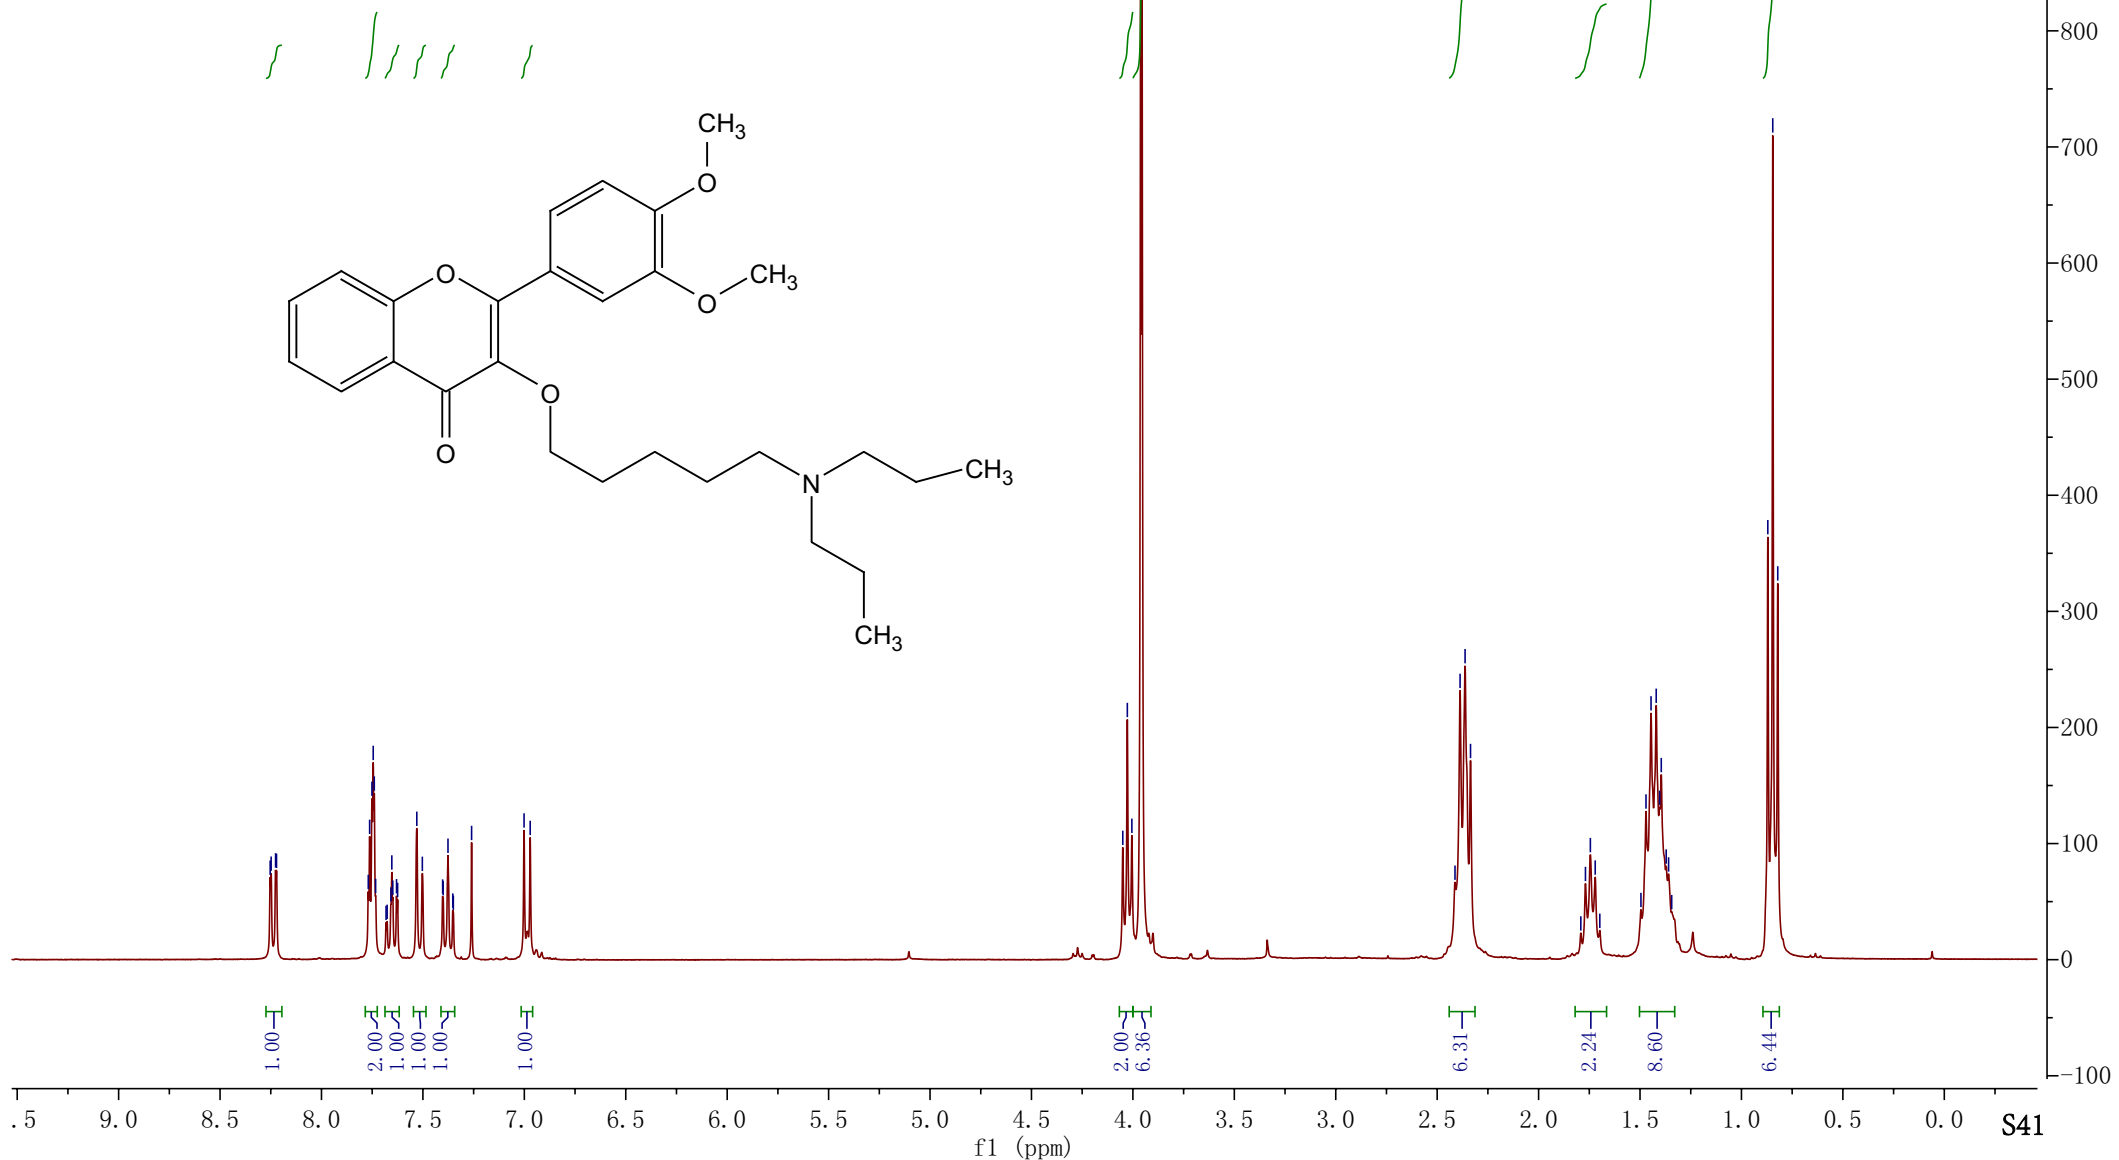

Xiang LI

XL-35-137-5 CNMR CDCL3 75MHZ (7/2016)

**<sup>13</sup>C NMR of 41 in CDCl<sub>3</sub>  
75 MHz**

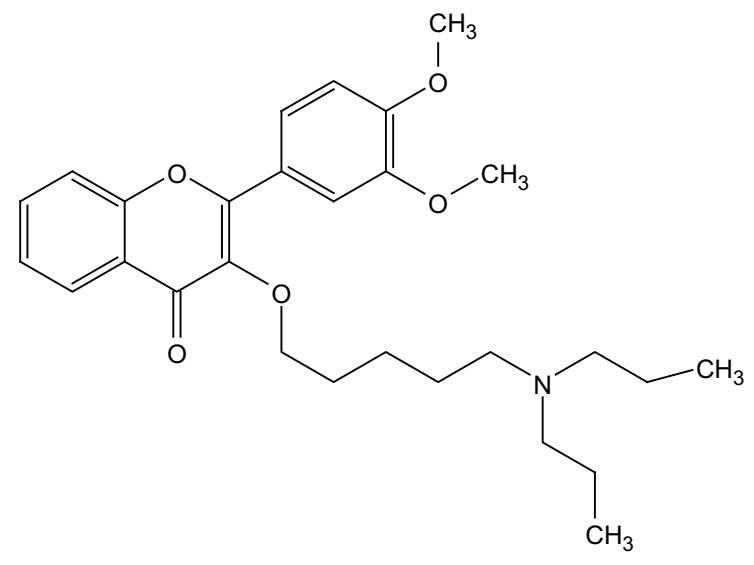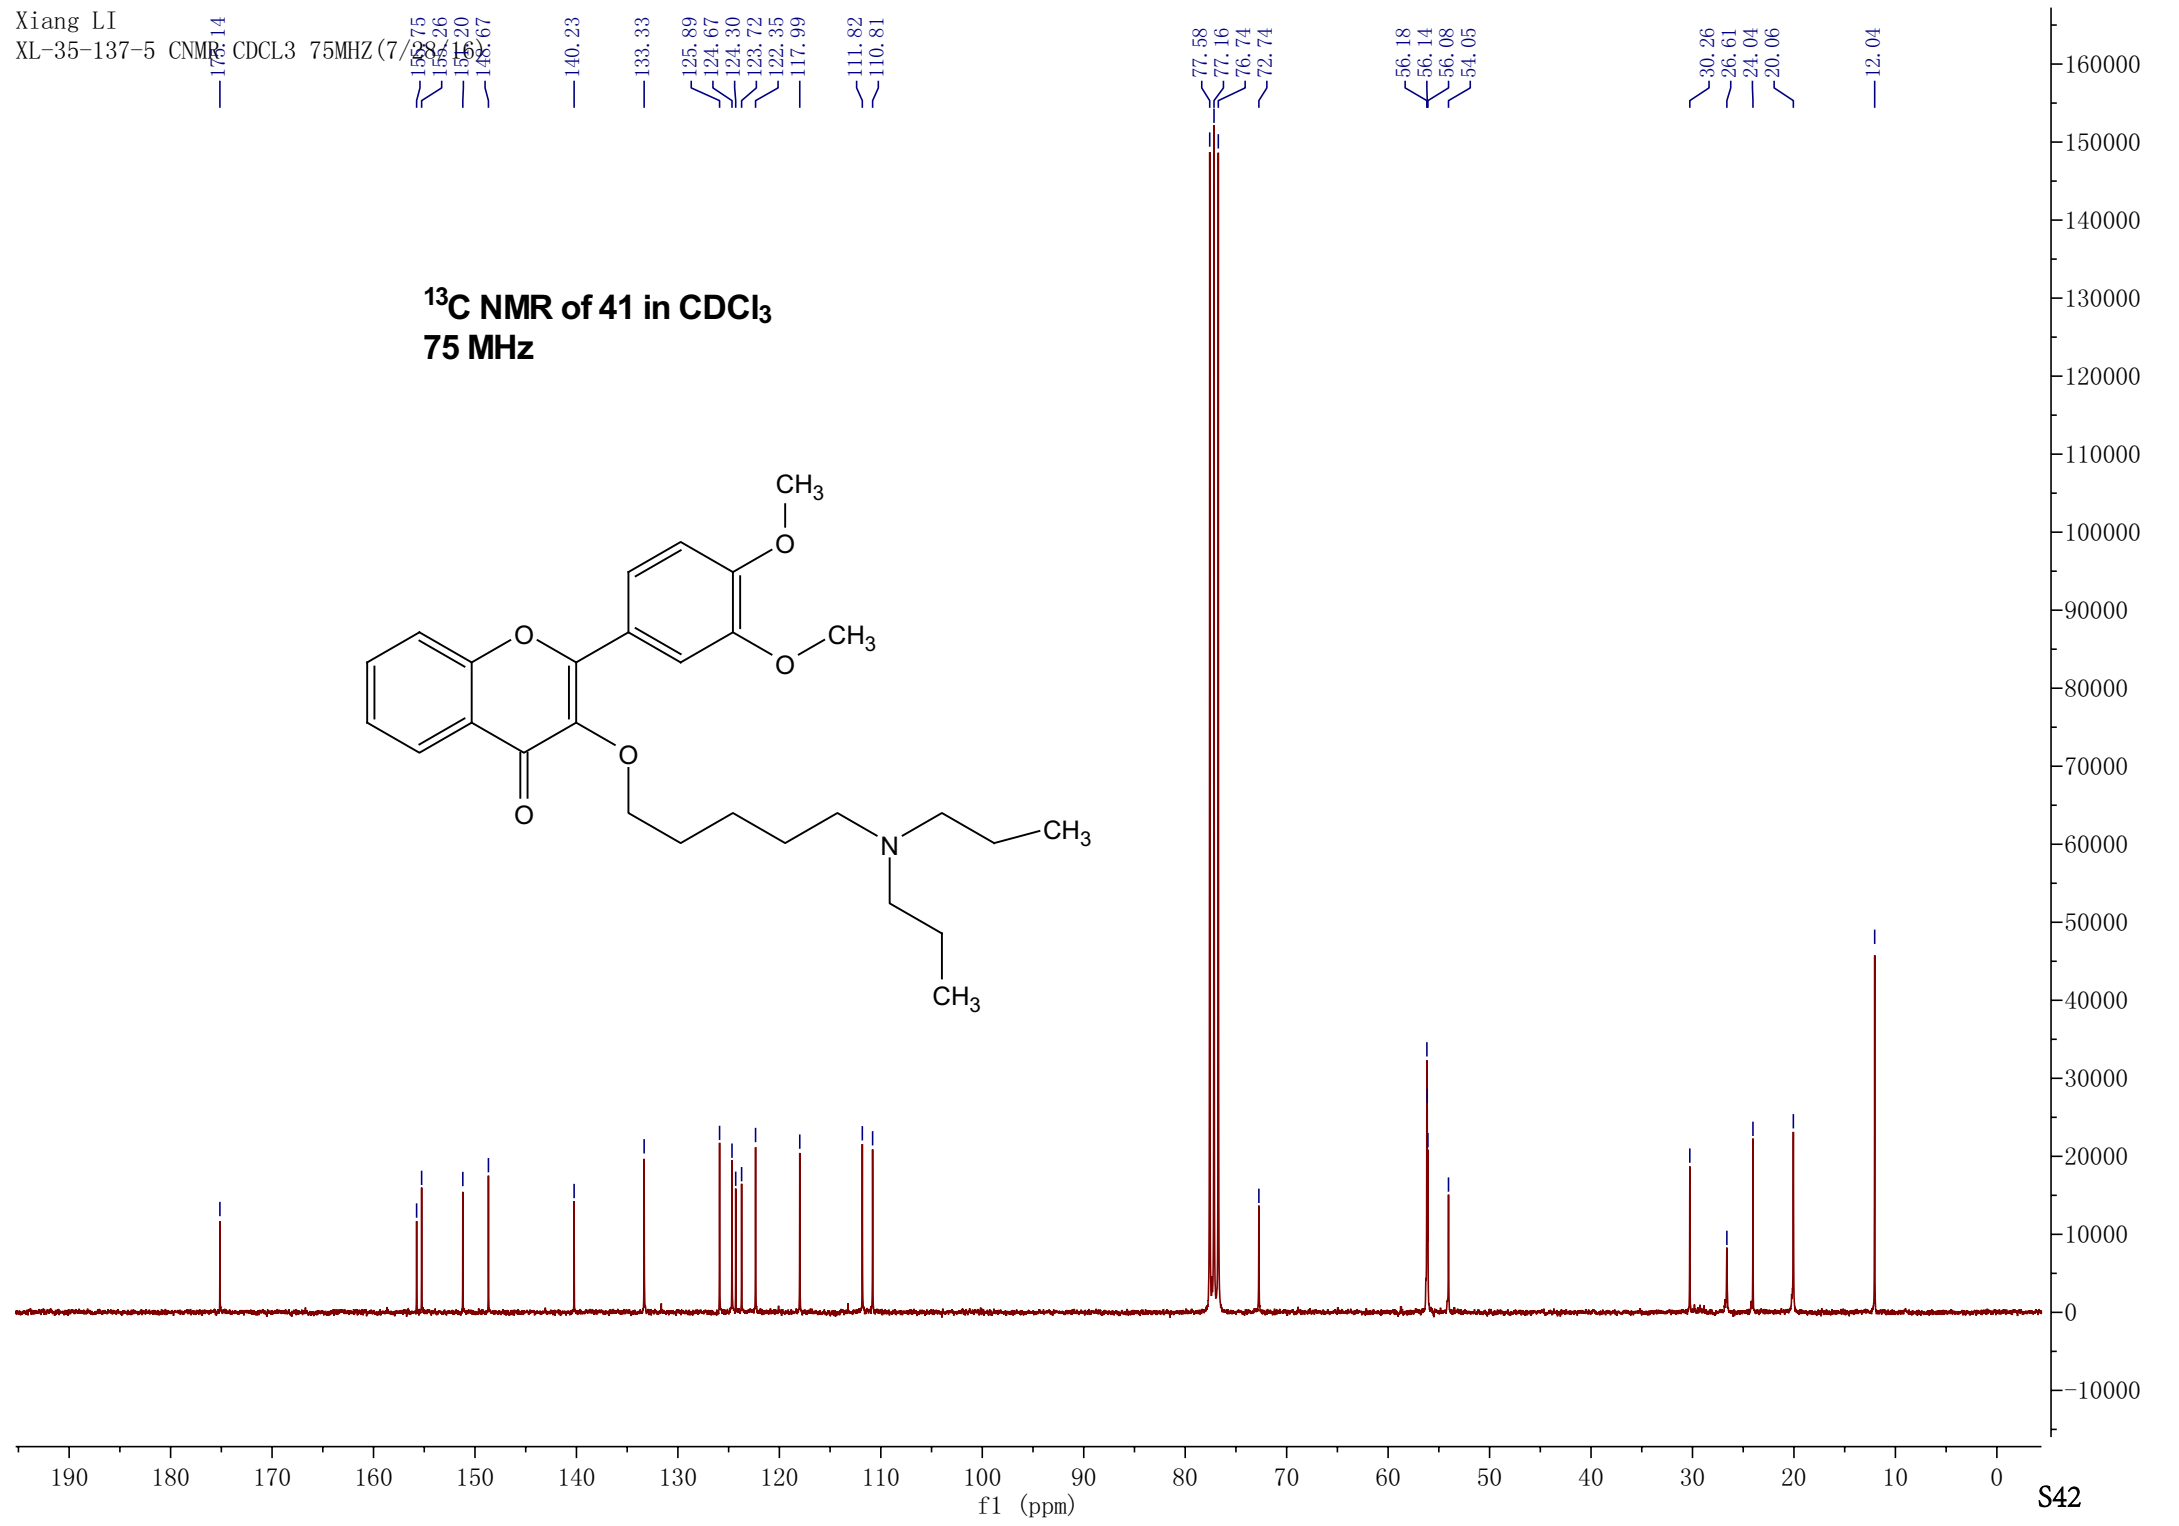

8.25  
8.25  
8.22  
8.22  
7.74  
7.73  
7.72  
7.65  
7.53  
7.50  
7.38  
7.00  
6.97

4.10  
4.08  
4.05  
3.96

2.58  
2.55  
2.53  
2.39  
2.37  
2.34

1.93  
1.91  
1.89  
1.86

1.28  
1.26  
1.24  
1.22  
0.88  
0.85  
0.83

### <sup>1</sup>H NMR of 45 in CDCl<sub>3</sub> 300 MHz

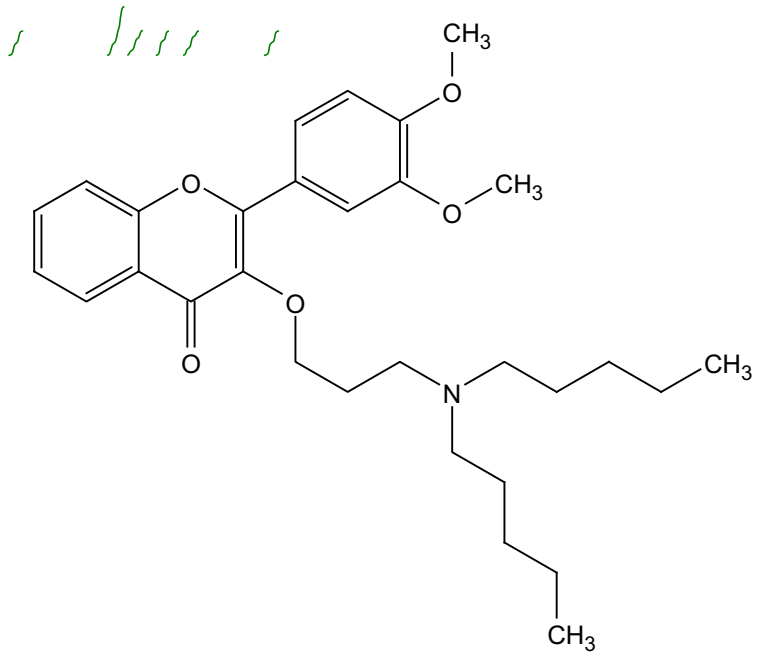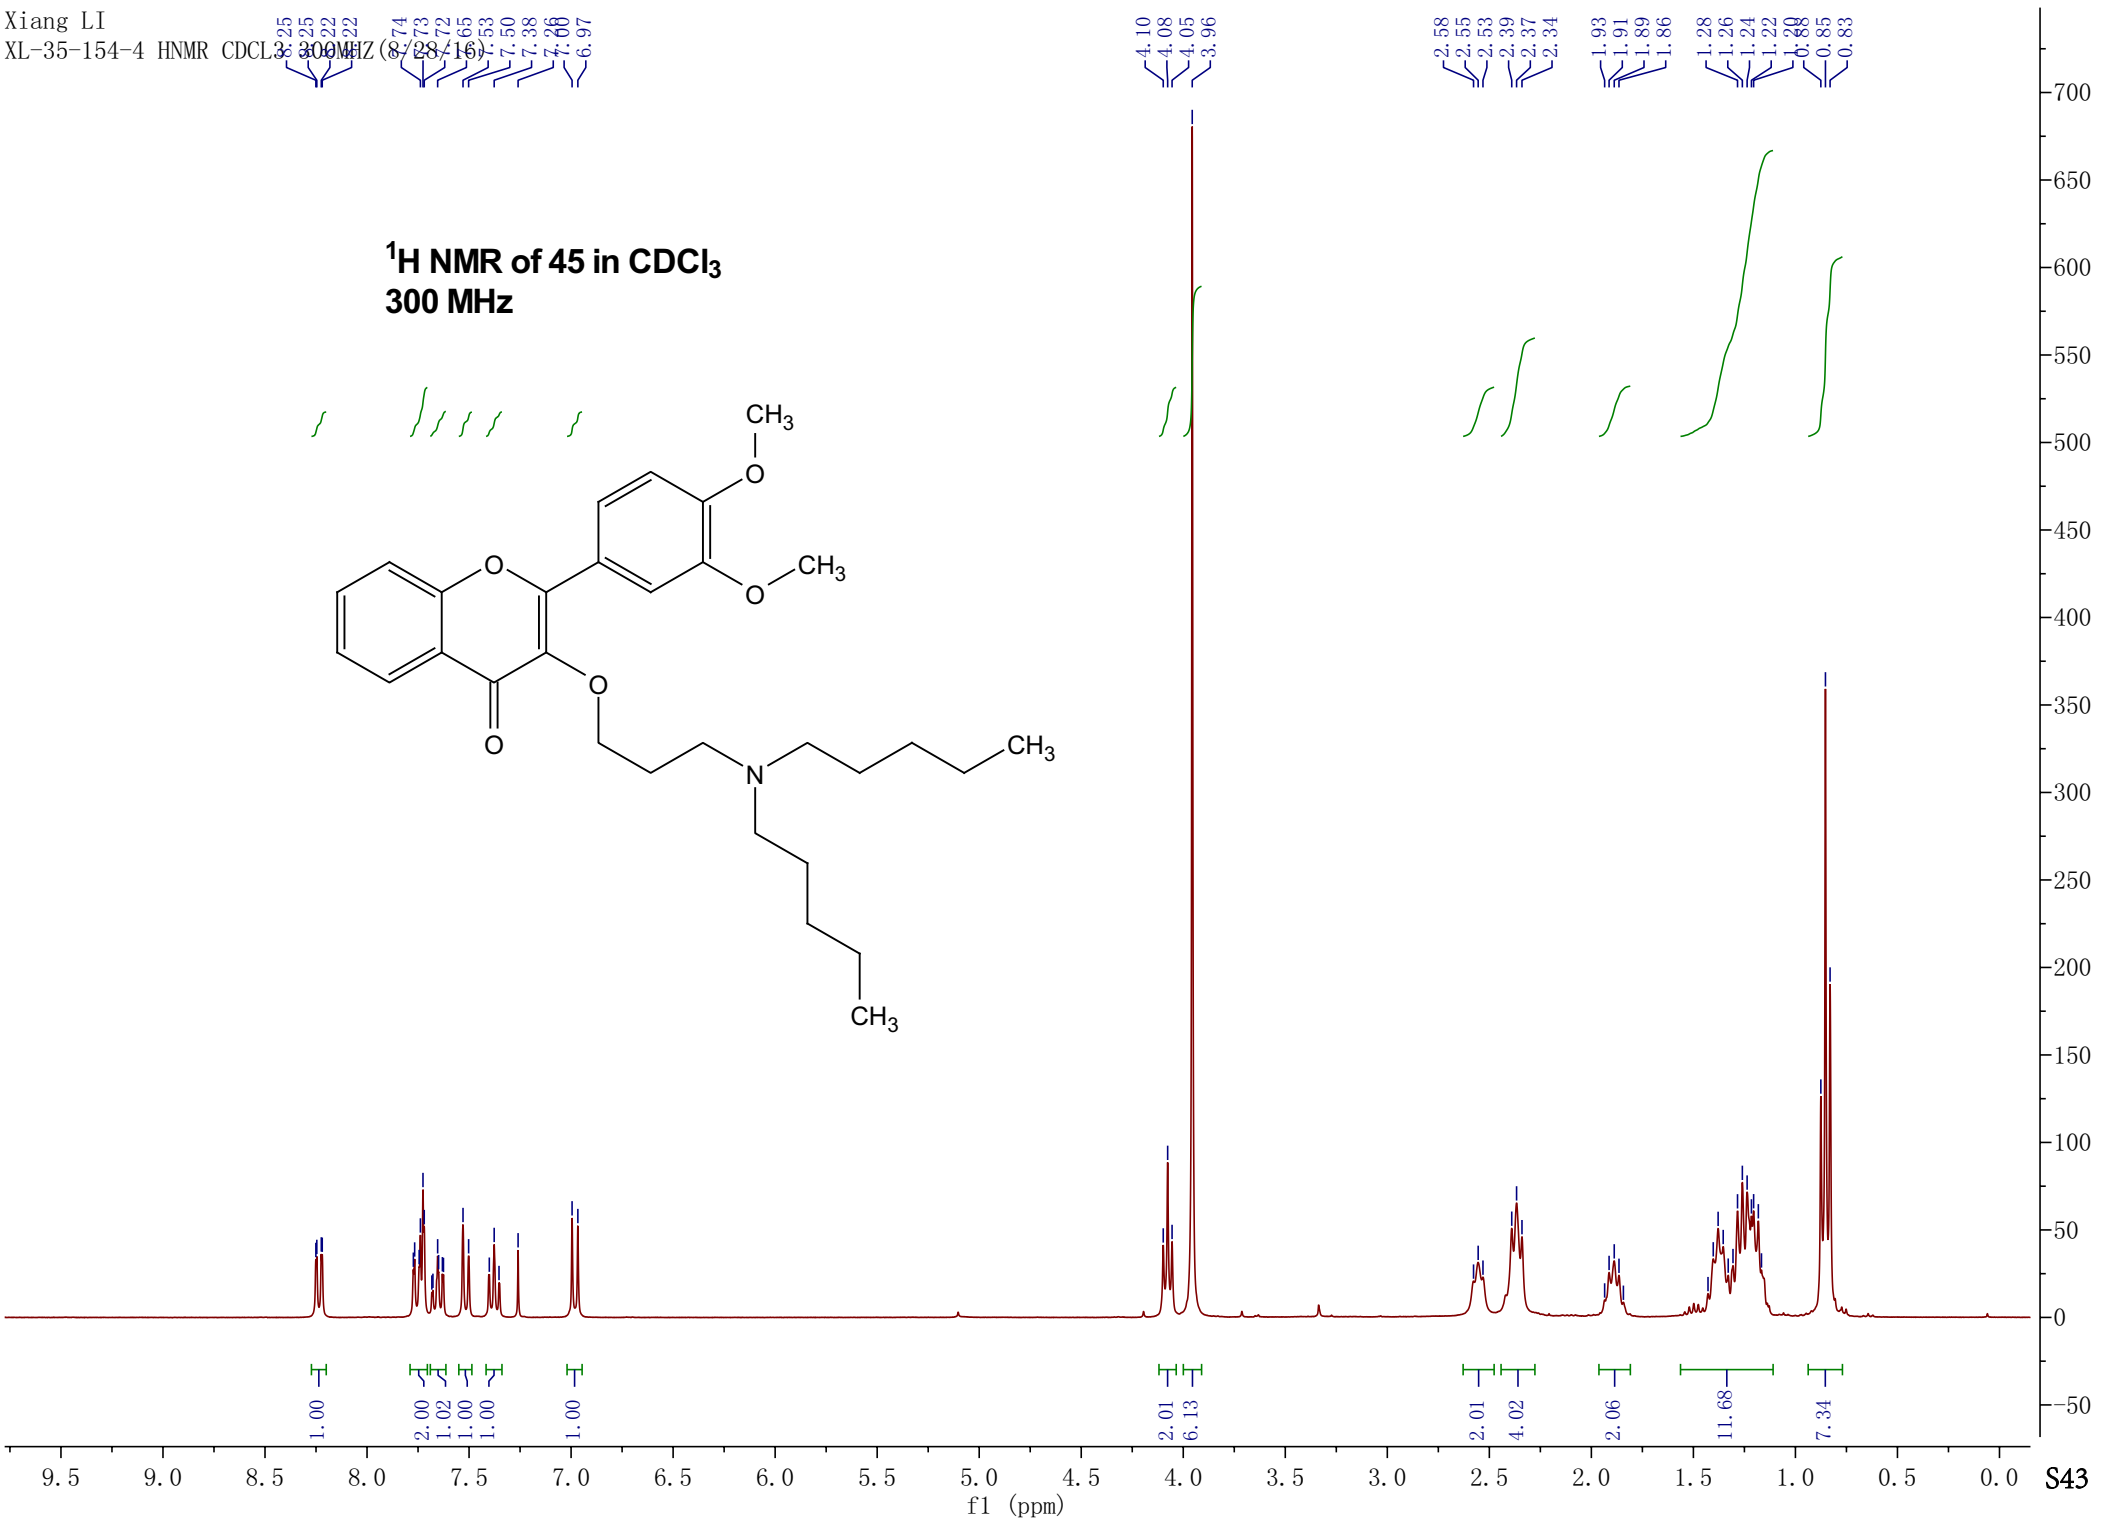

**<sup>13</sup>C NMR of 45 in CDCl<sub>3</sub>  
75 MHz**

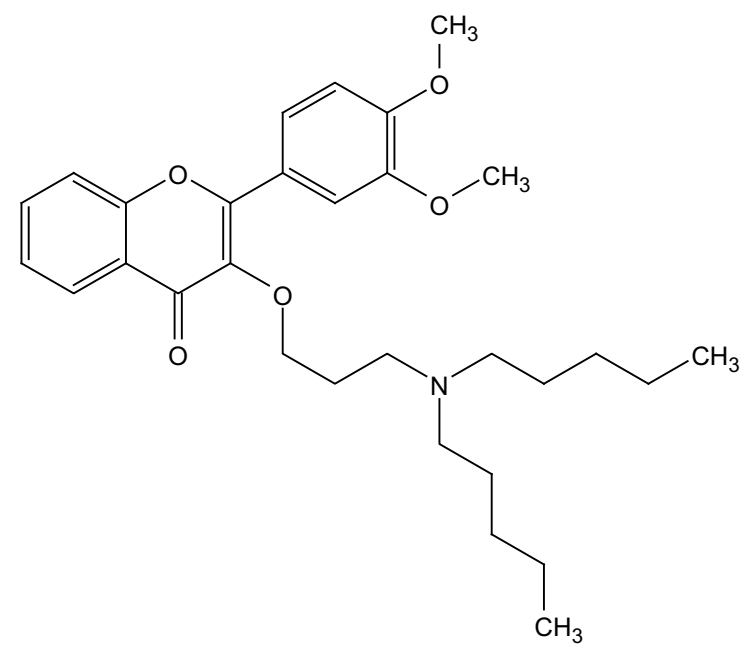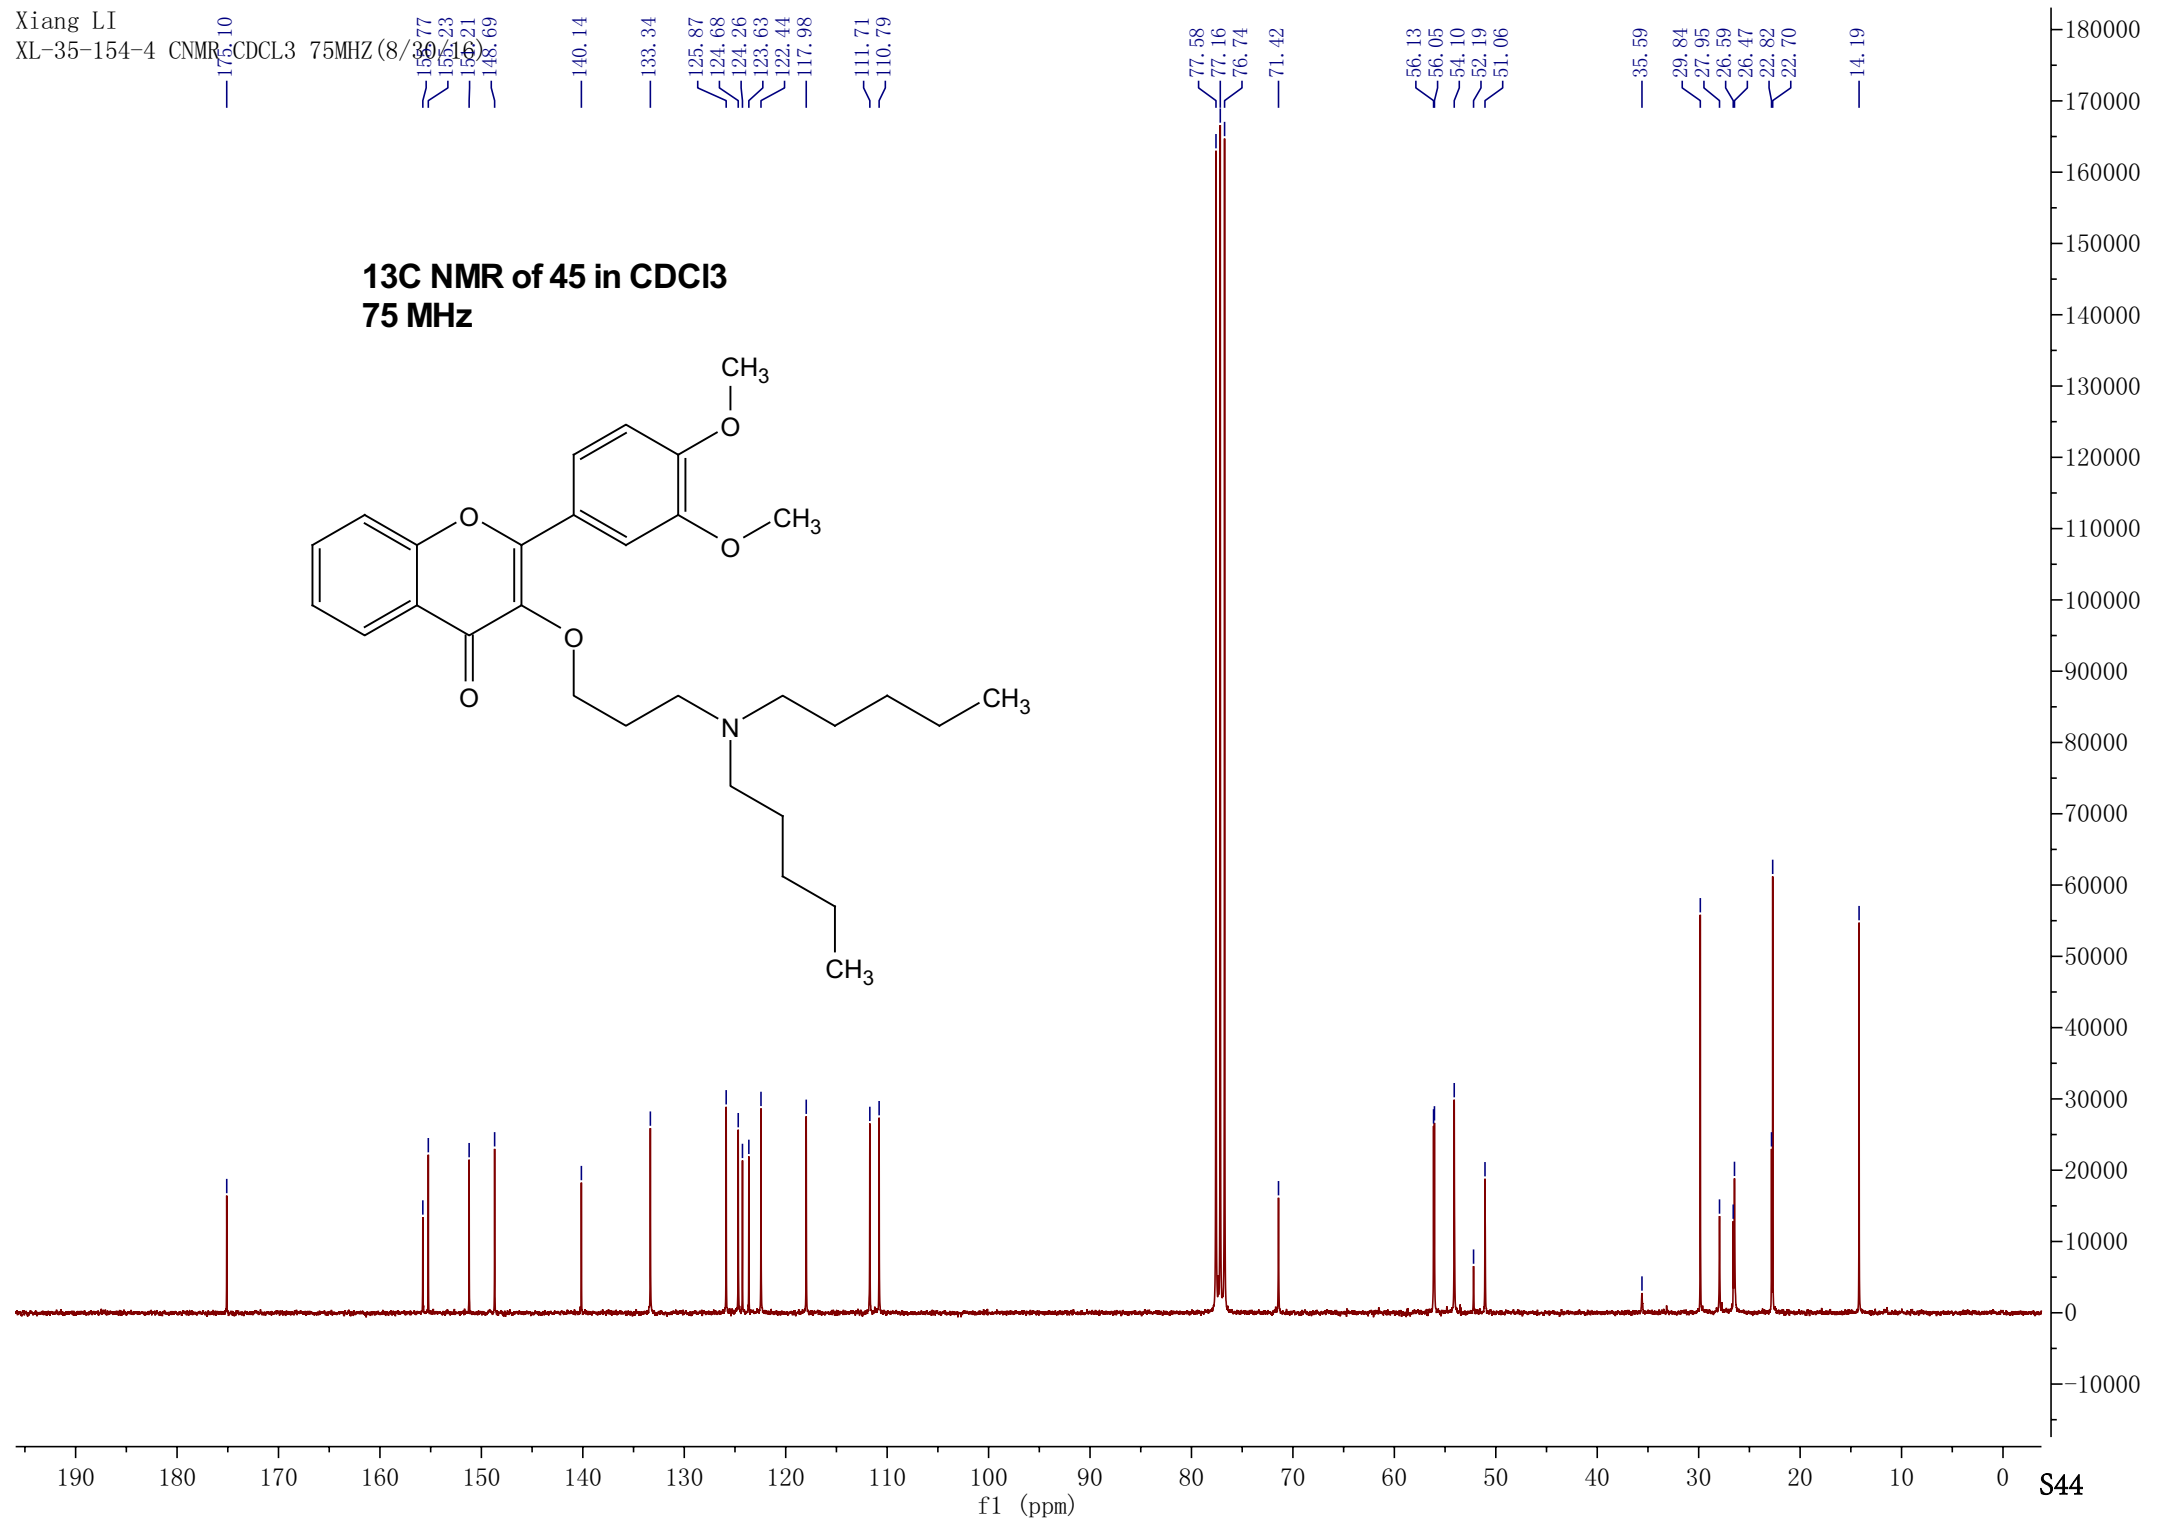



Xiang LI

XL-35-155-5 HNMR CDCl<sub>3</sub>

300 MHz

**<sup>1</sup>H NMR of 46 in CDCl<sub>3</sub>  
300 MHz**

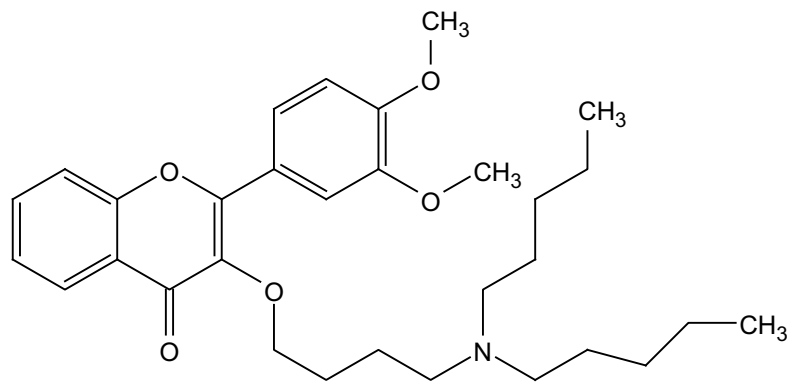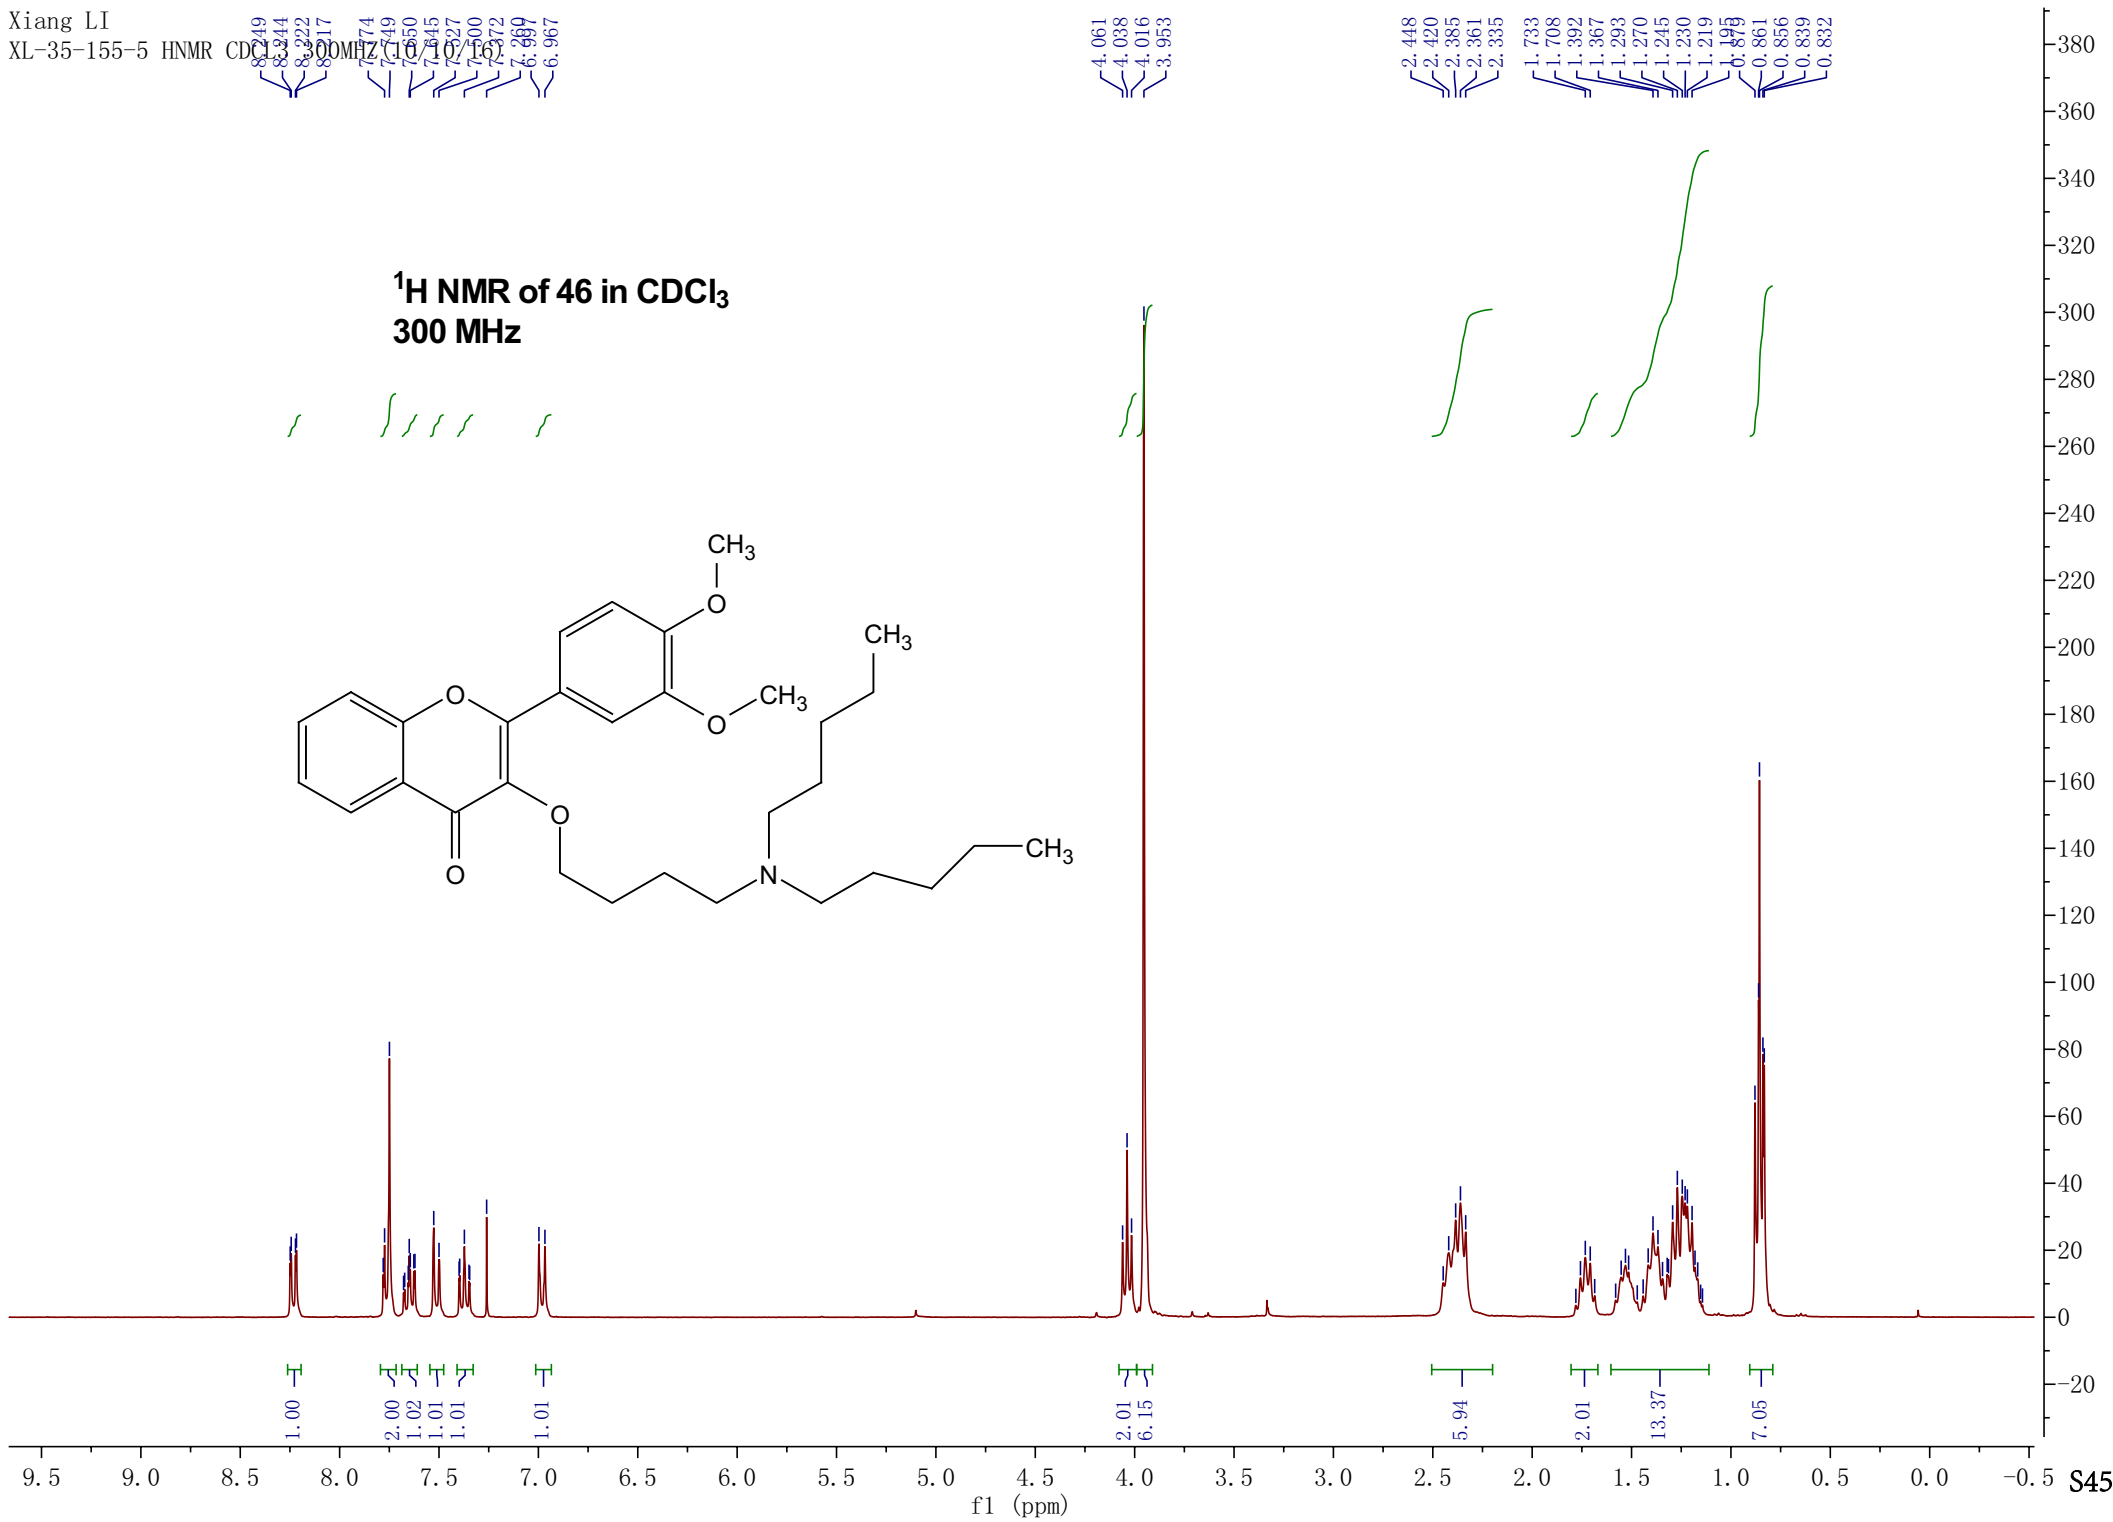

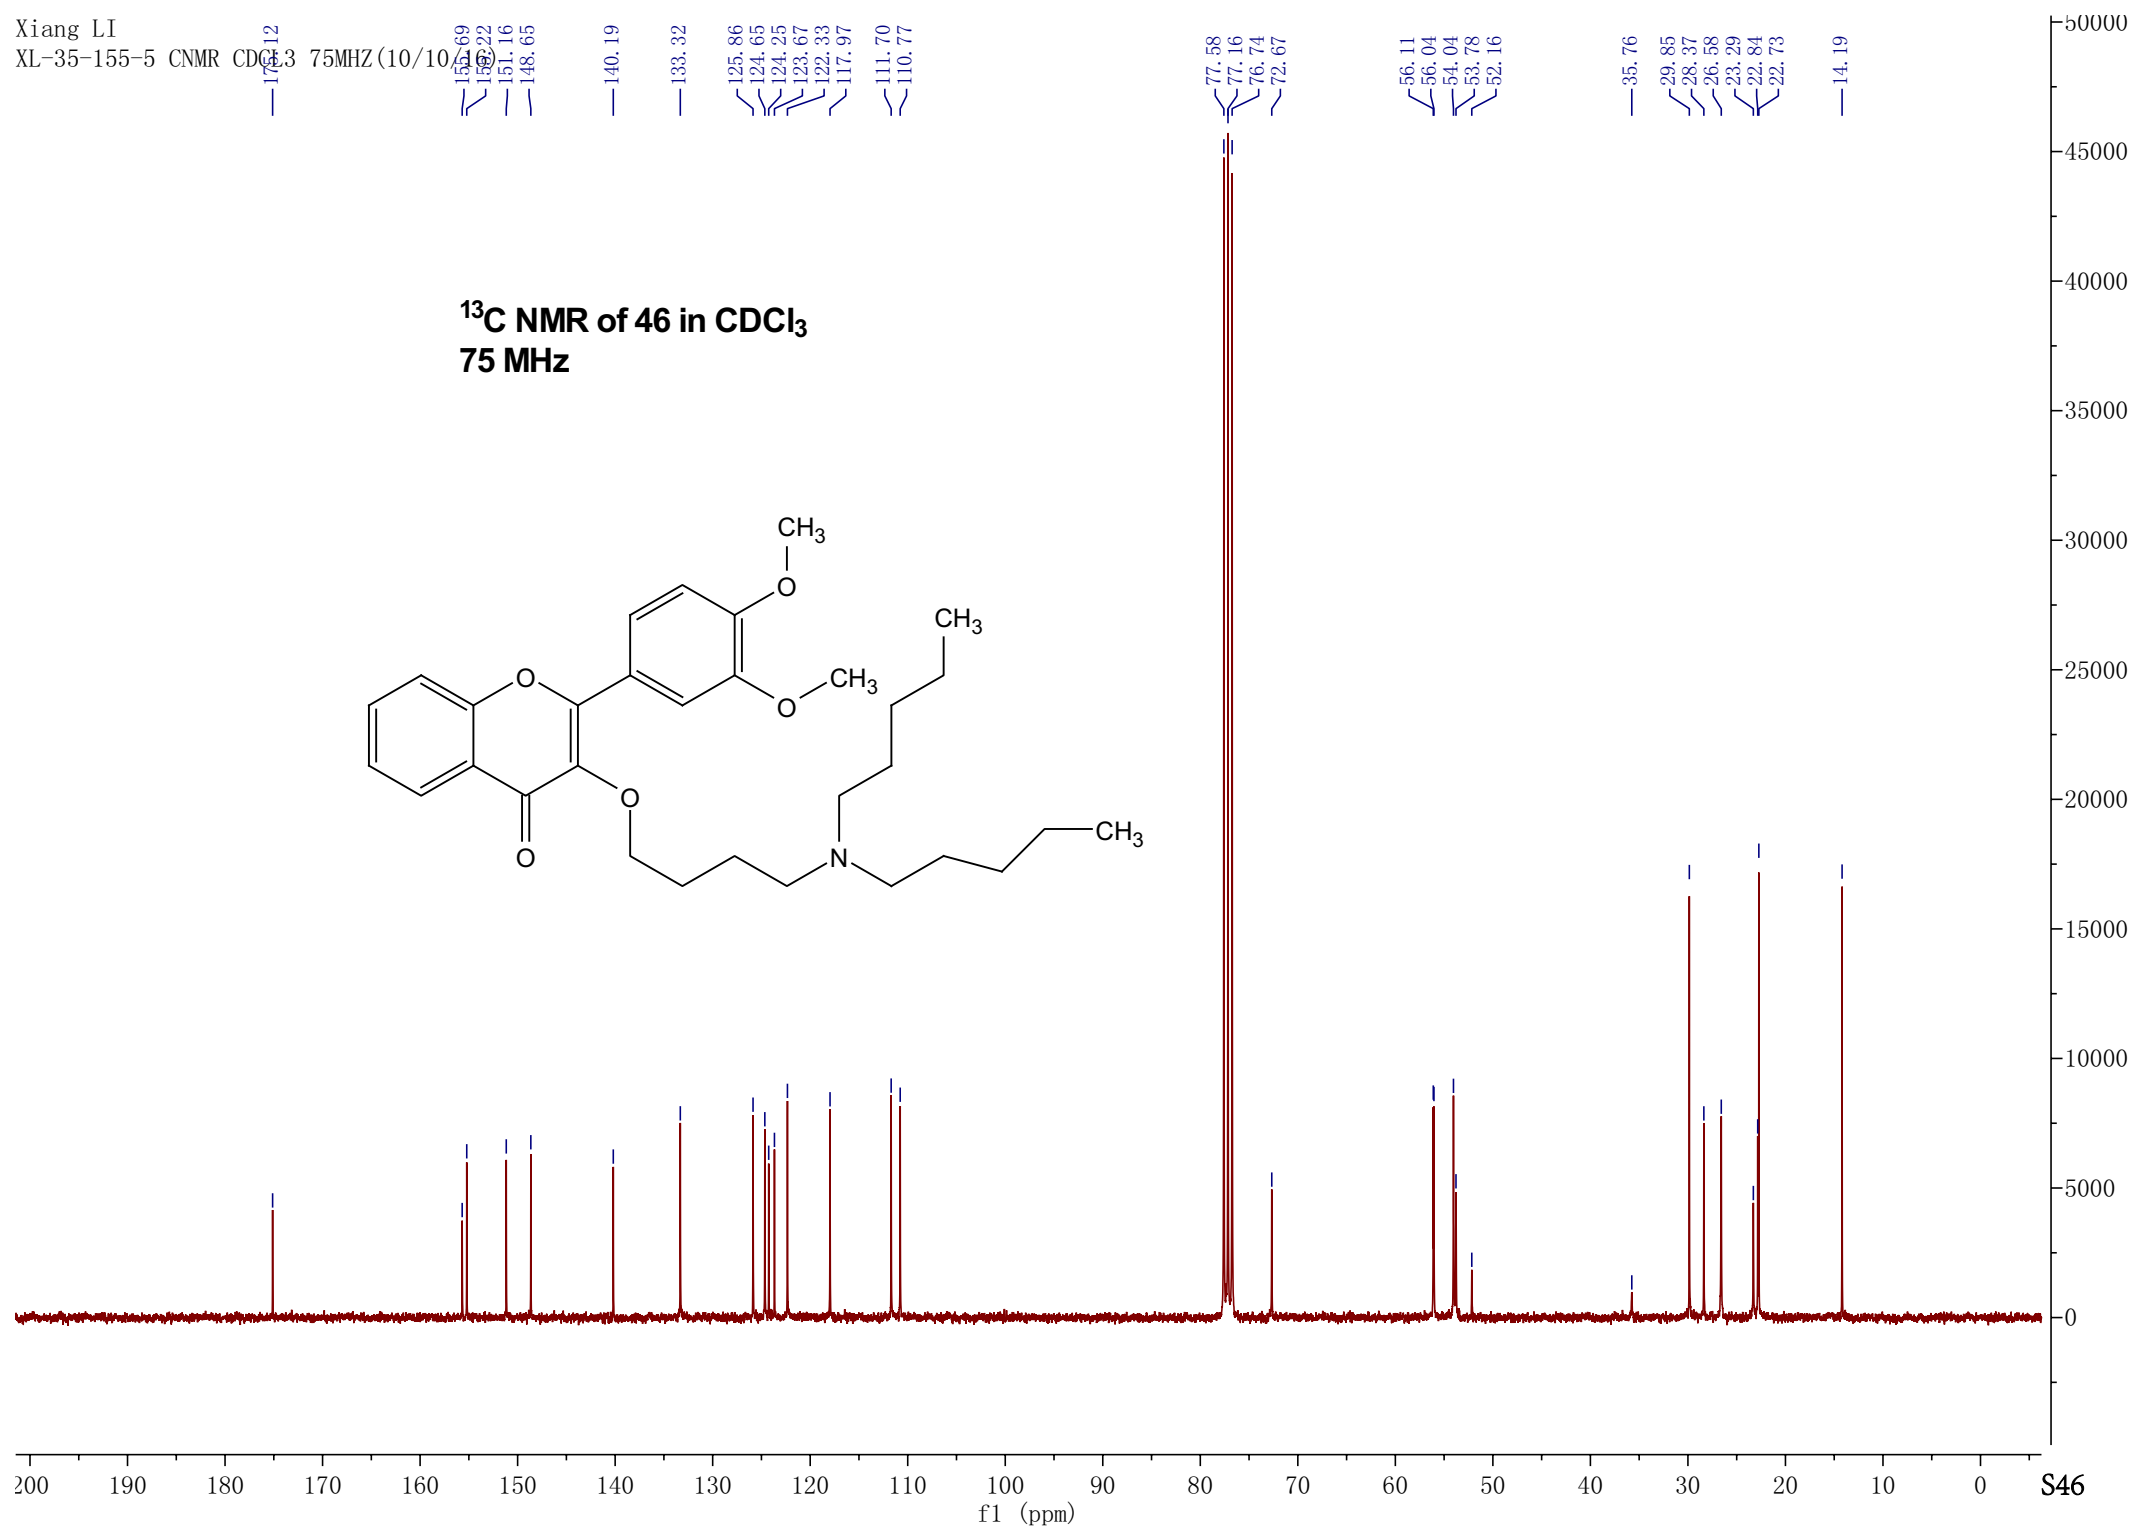

**<sup>1</sup>H NMR of 47 in CDCl<sub>3</sub>  
300 MHz**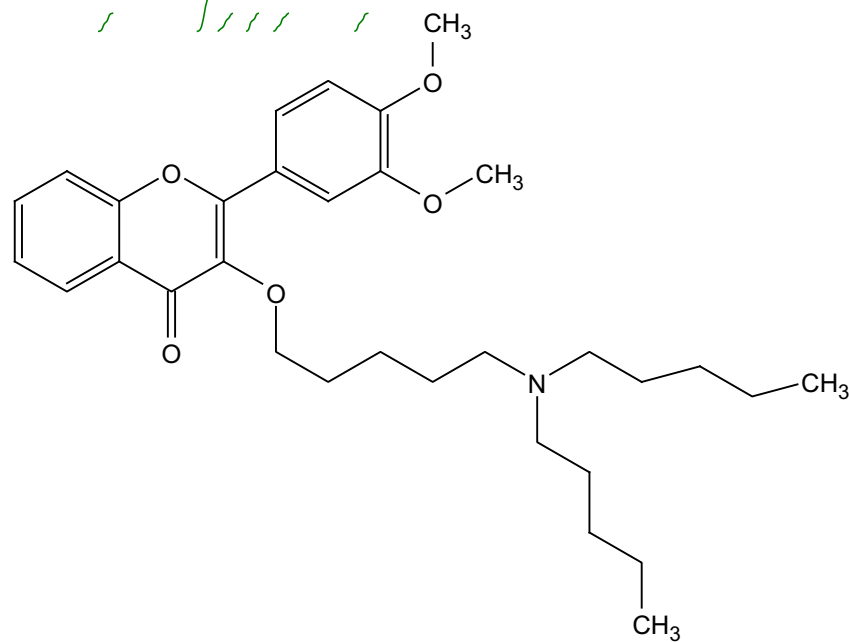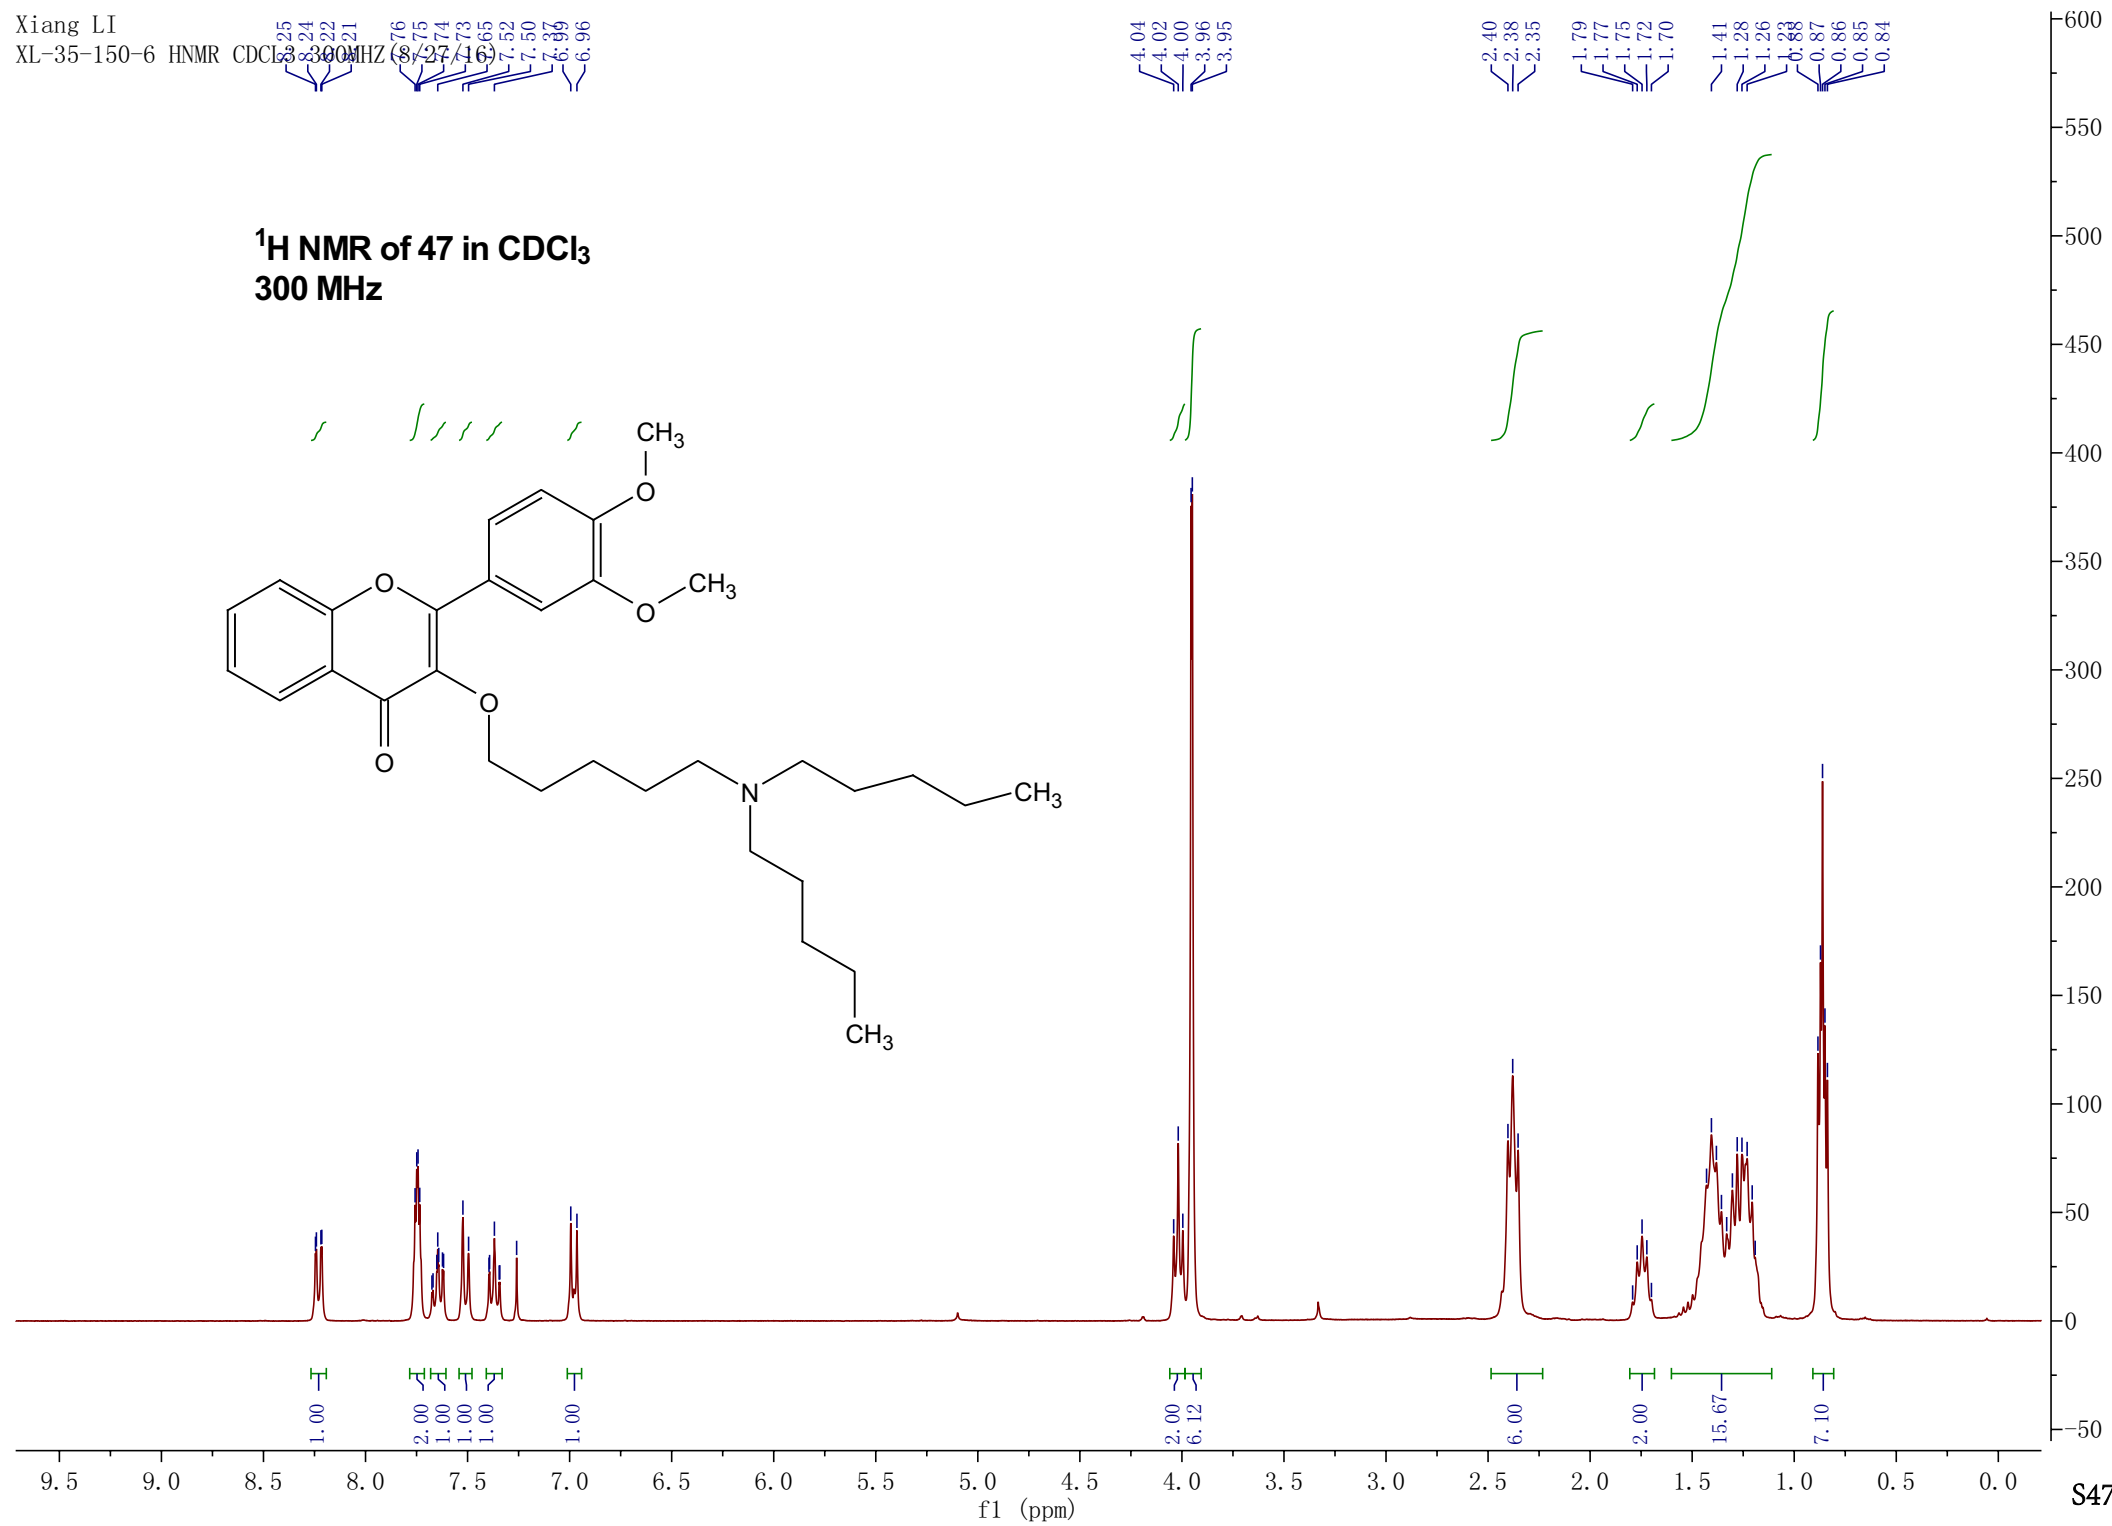

175.12 157.73 157.23 156.16 148.64 140.20 133.32 125.87 124.65 124.27 123.68 122.31 117.97 111.77 110.78 77.58 77.16 76.74 72.71 56.11 56.06 54.11 54.02 52.22 35.61 30.27 29.89 26.66 26.58 26.48 24.06 22.85 22.73 14.19

**<sup>13</sup>C NMR of 47 in CDCl<sub>3</sub>  
75 MHz**

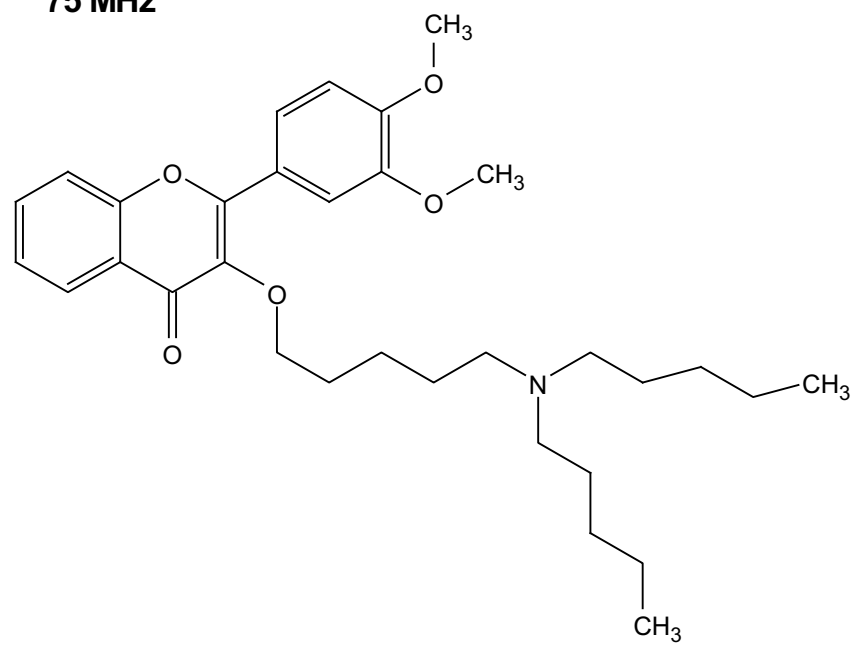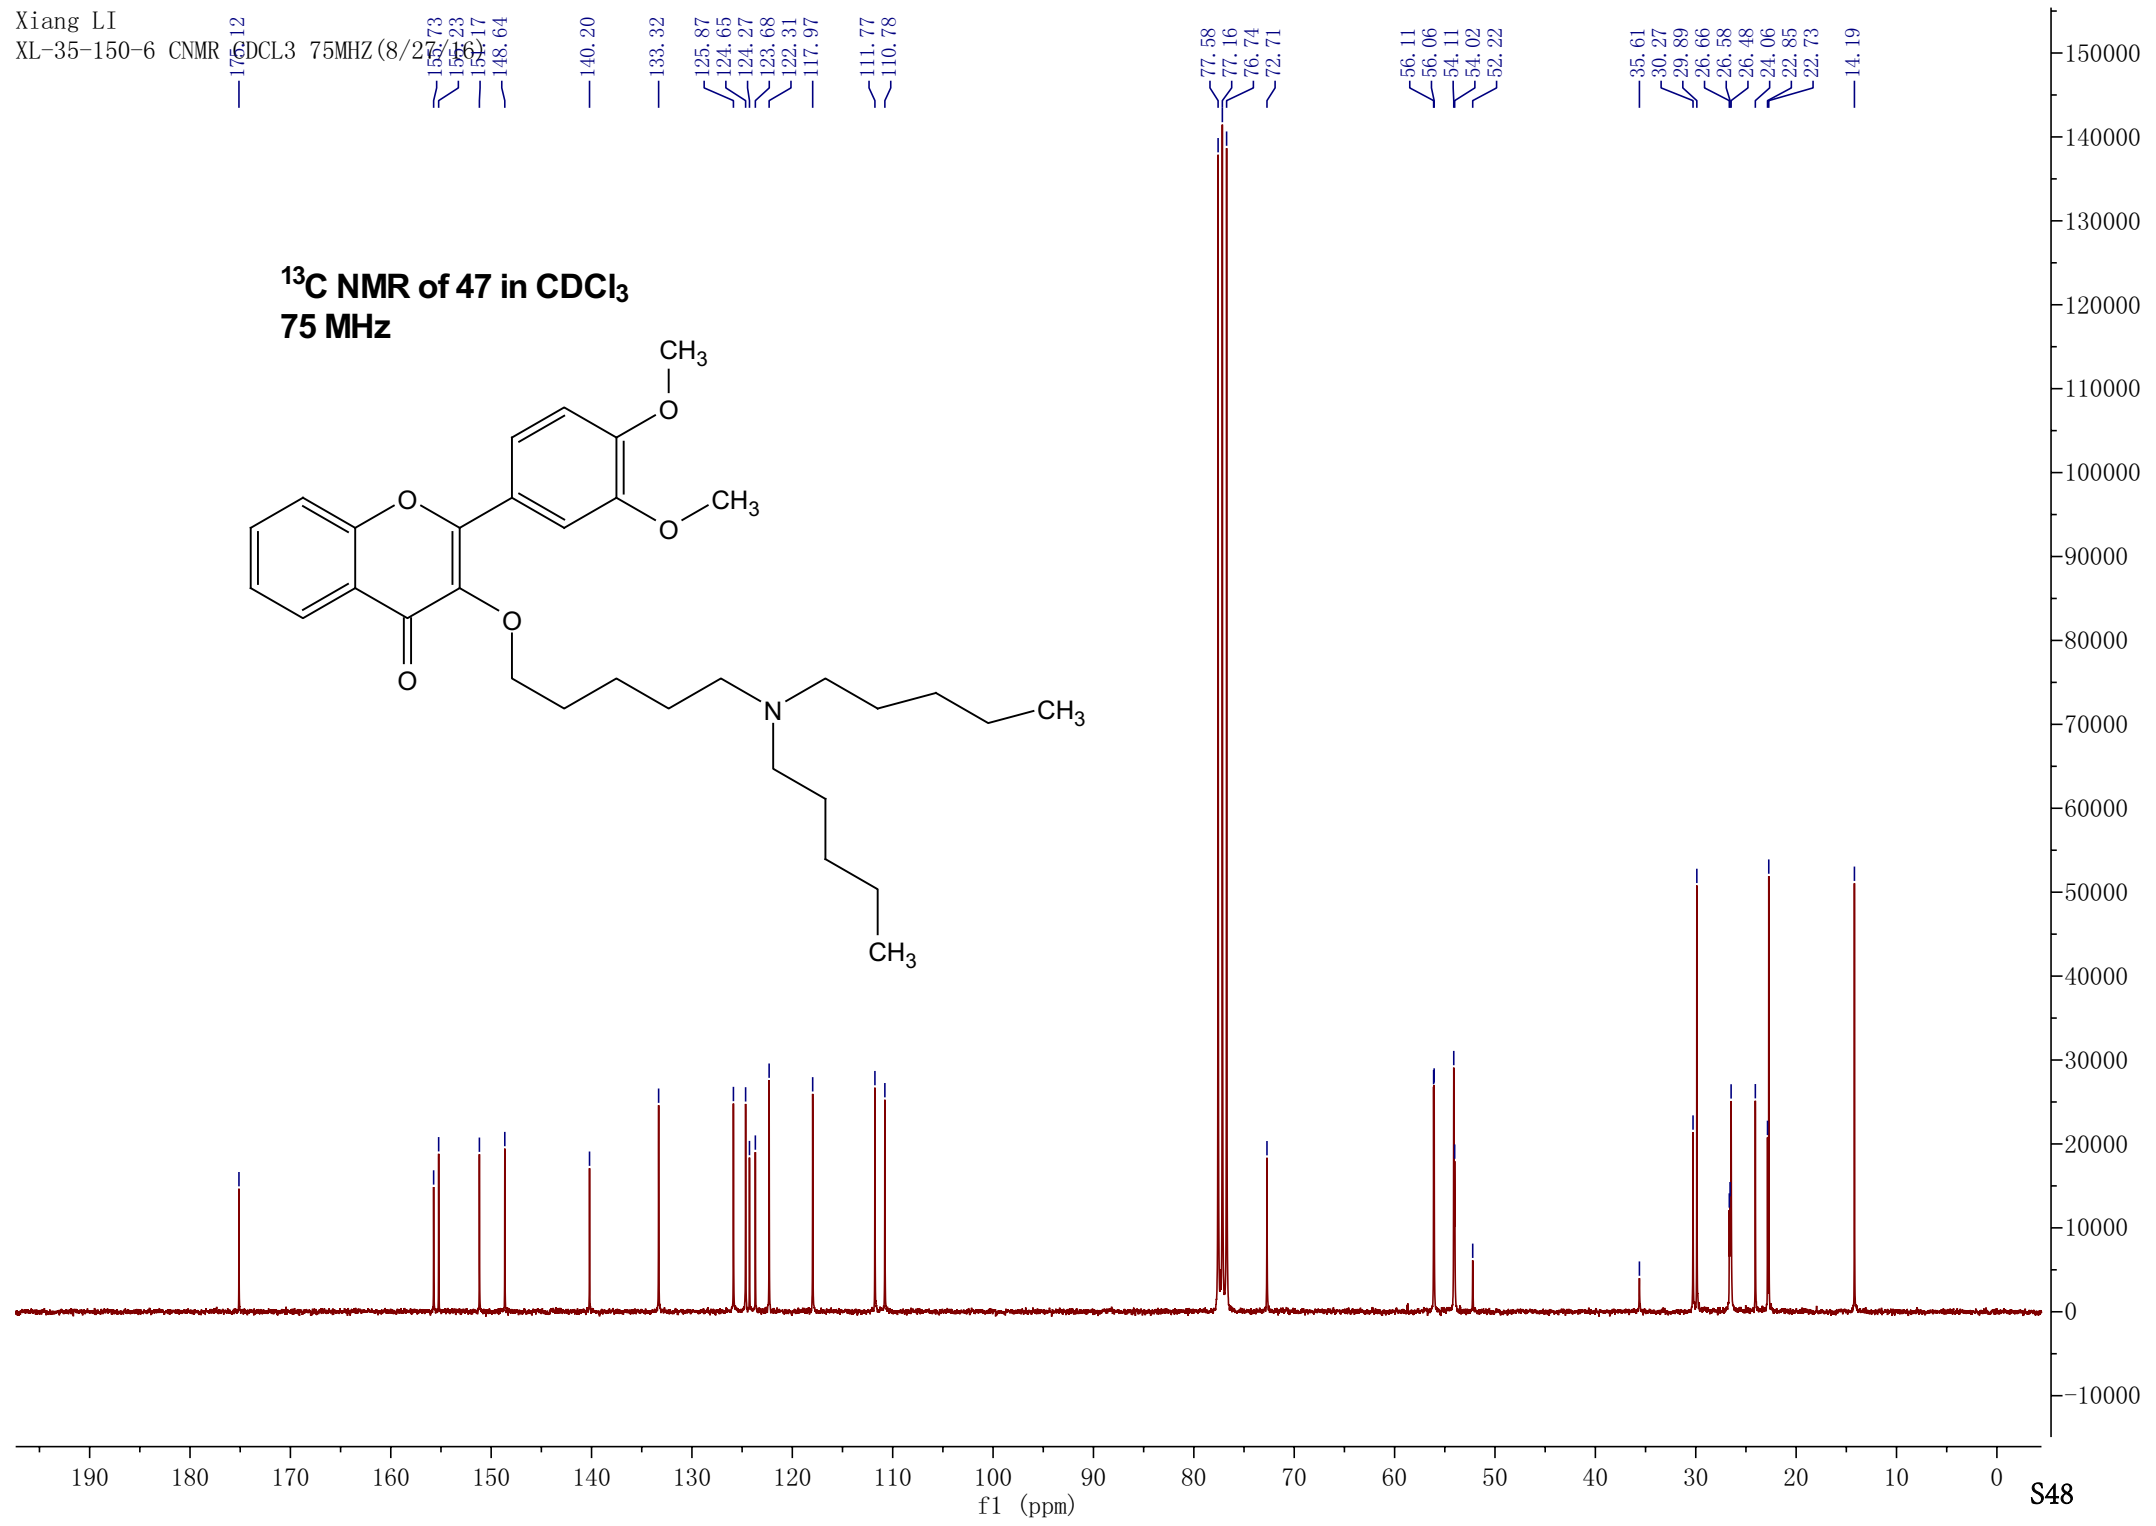

7.24  
7.23  
7.21  
7.21  
7.74  
7.71  
7.69  
7.68  
7.64  
7.52  
7.49  
7.39  
6.96

4.08  
4.06  
4.03

2.48  
2.45  
2.43  
2.36  
1.98  
1.96  
1.93  
1.94  
1.57  
1.55  
1.54  
1.52  
1.43  
1.41  
1.40

**<sup>1</sup>H NMR of 51 in CDCl<sub>3</sub>  
300 MHz**

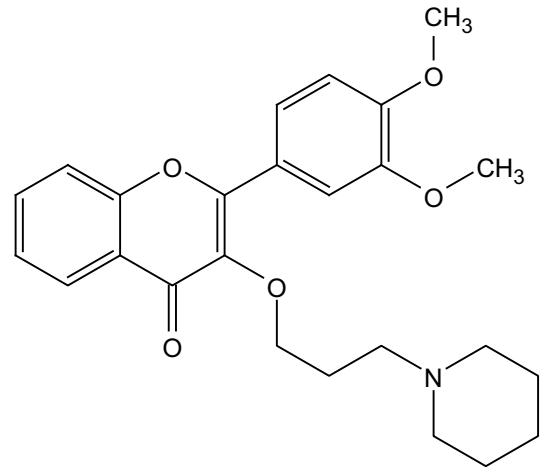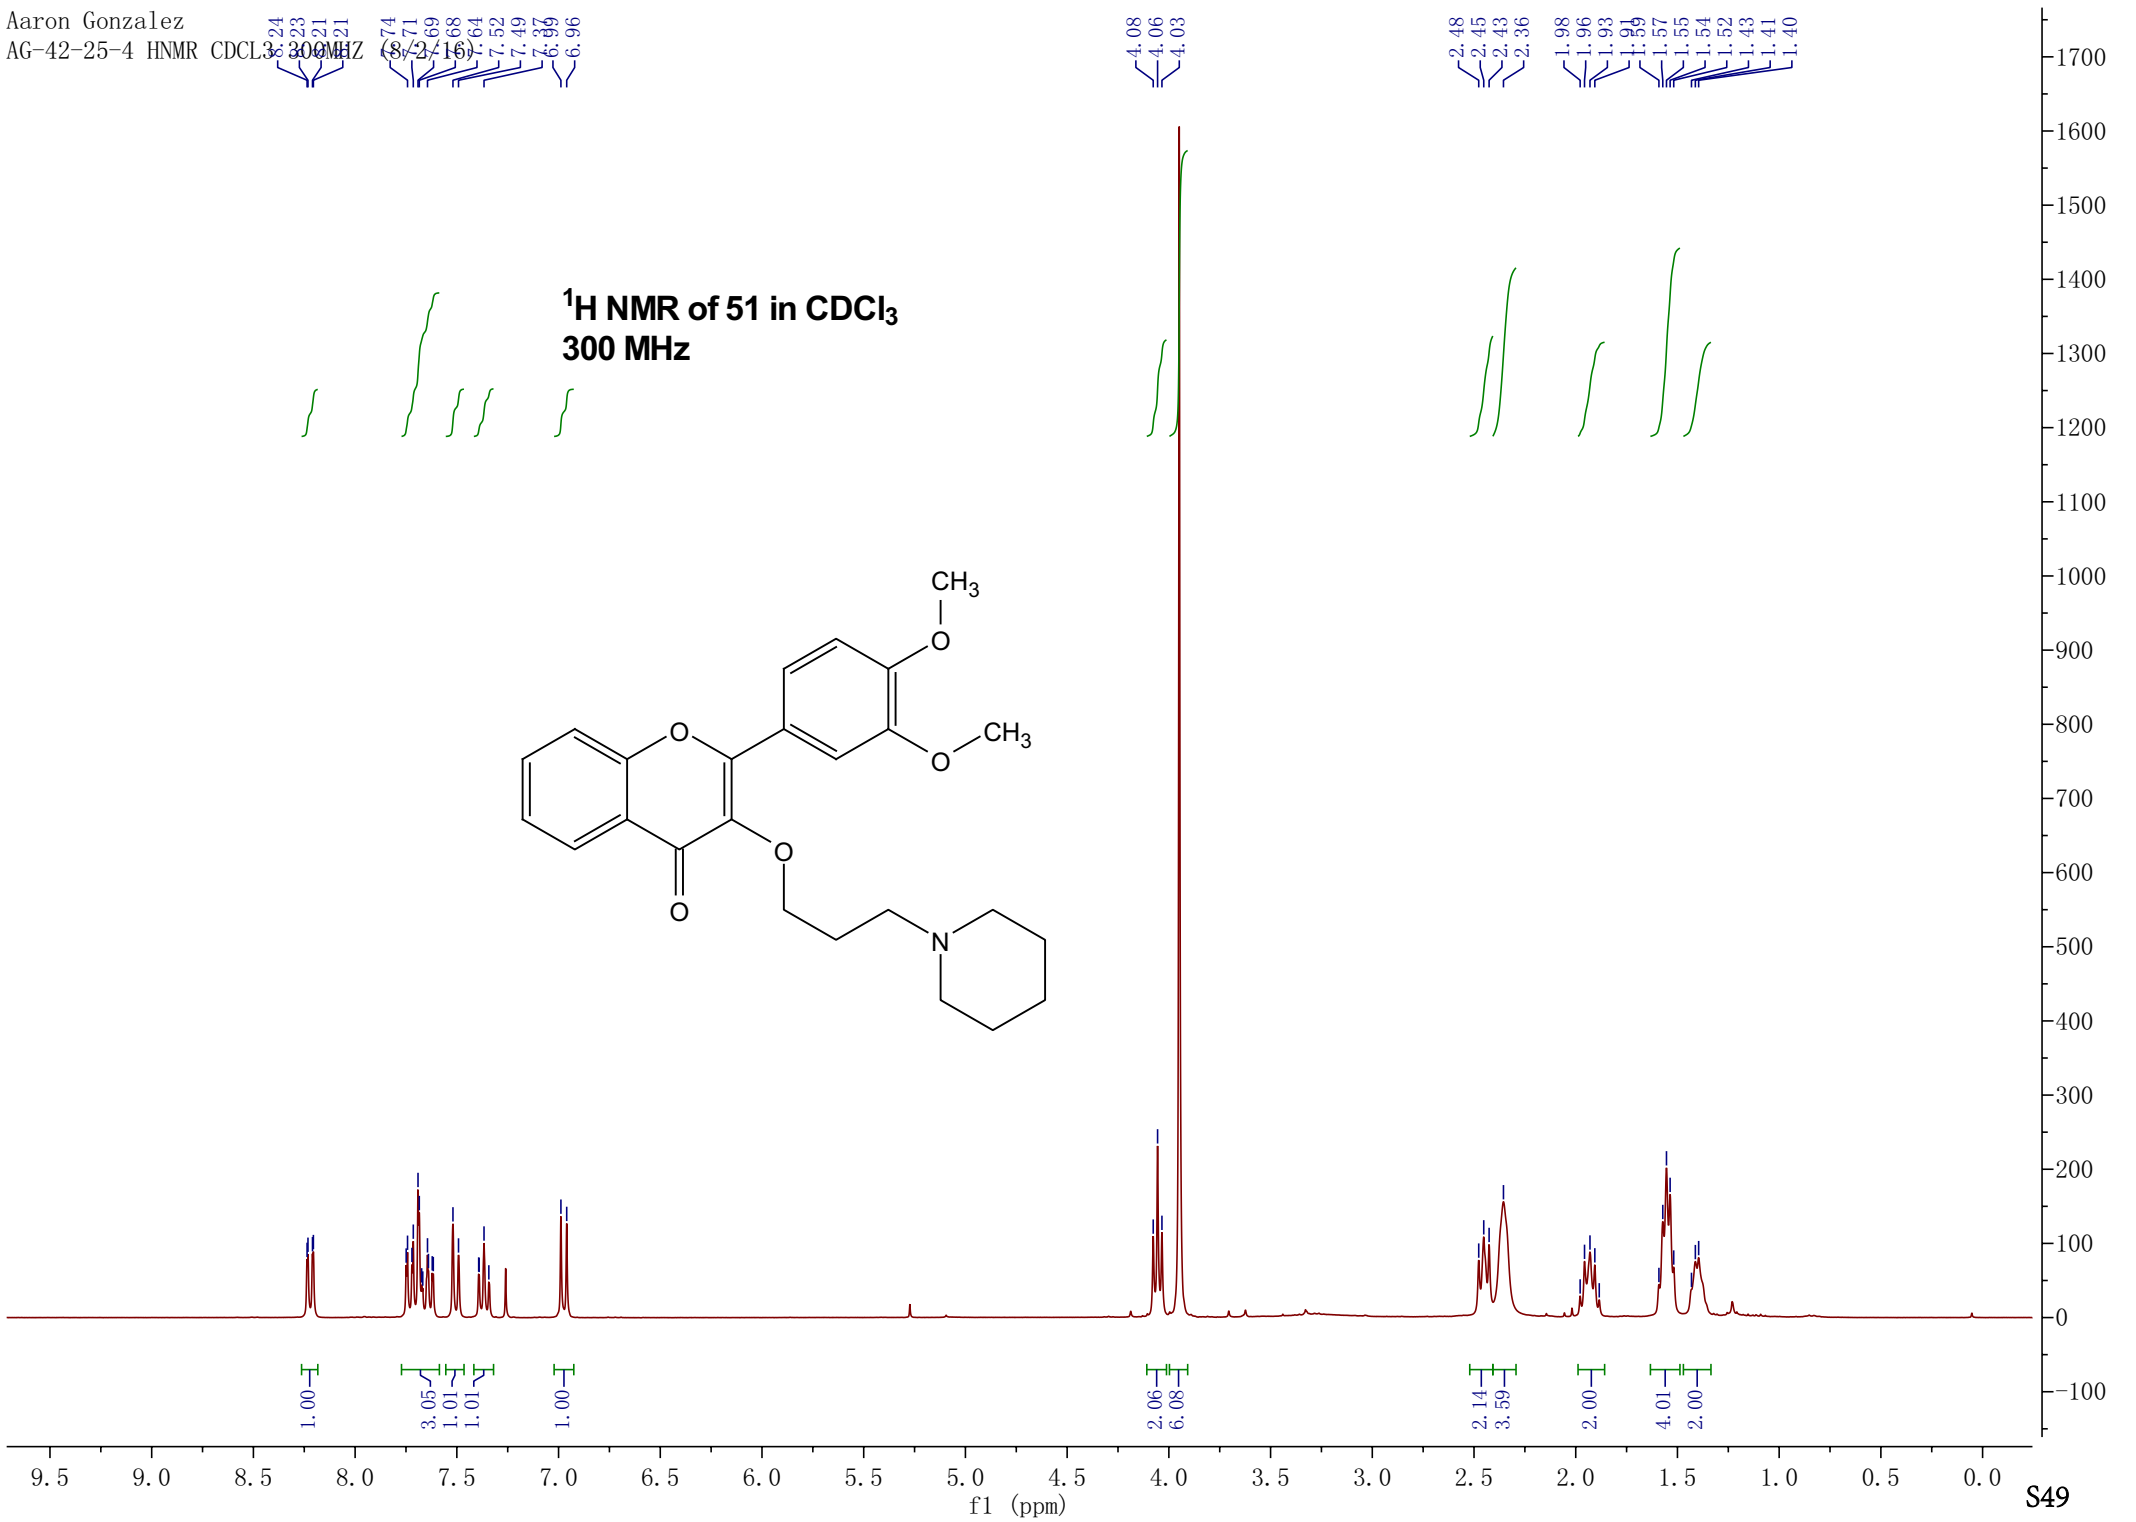

Aaron Gonzalez  
AG-42-25-4 CNMR CDCl3 75MHZ (8/20/16)

**<sup>13</sup>C NMR of 51 in CDCl<sub>3</sub>  
75 MHz**

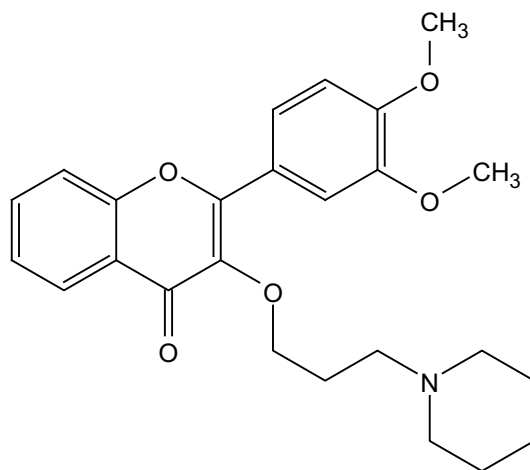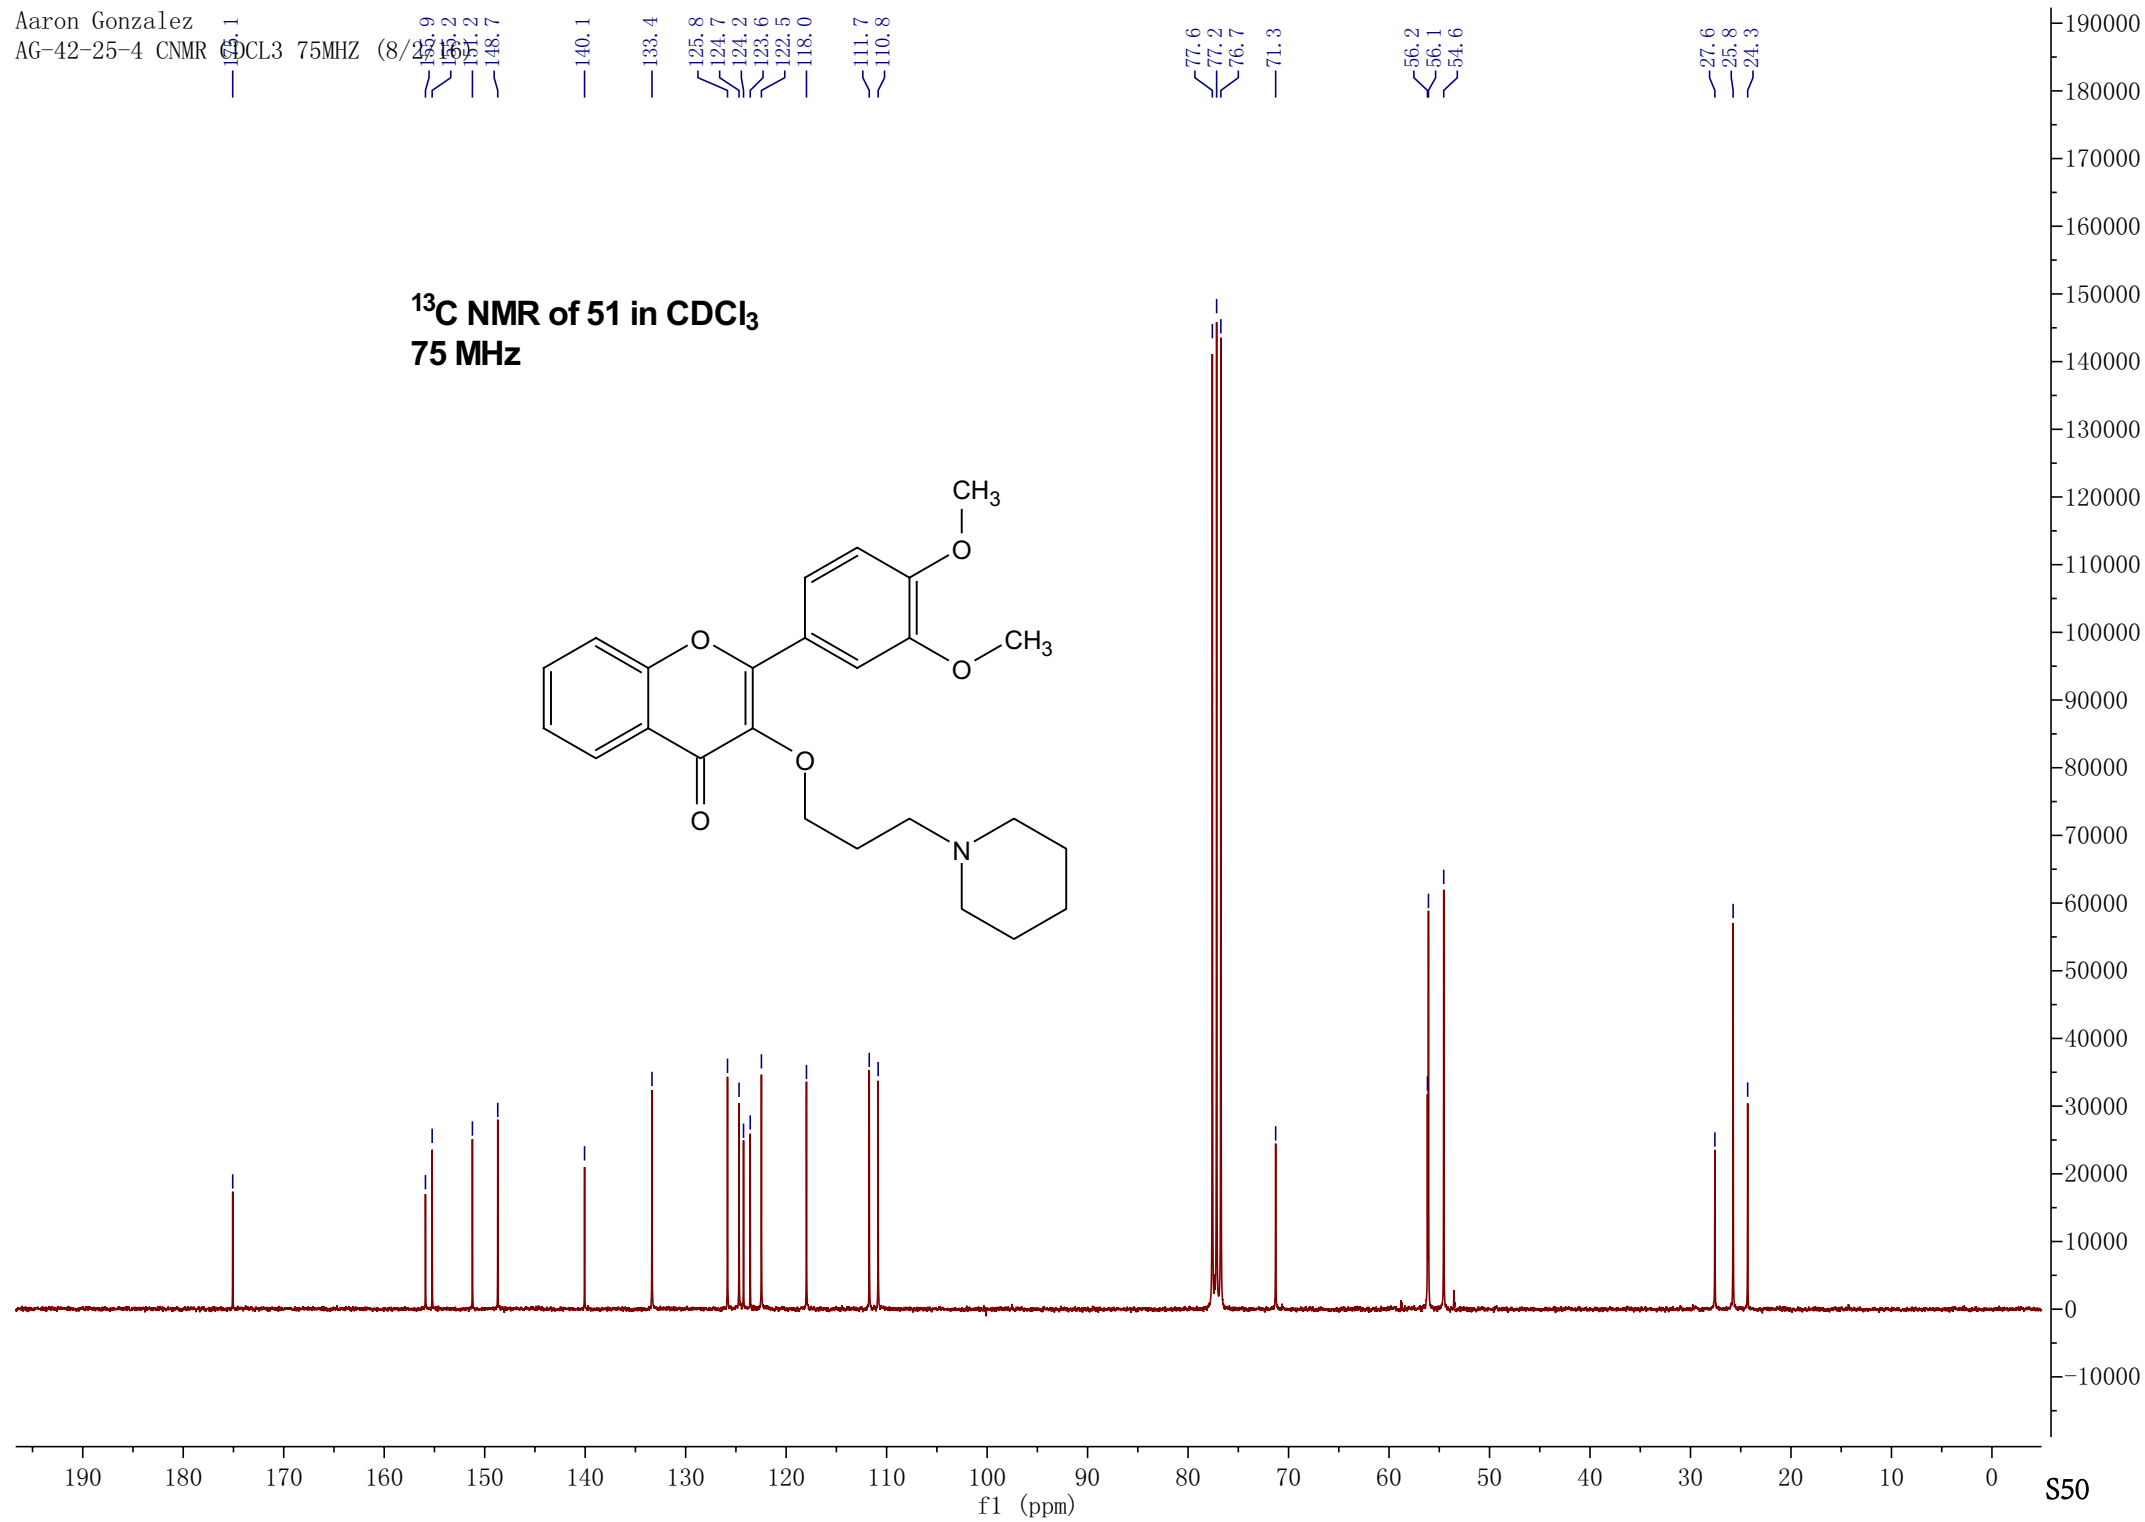

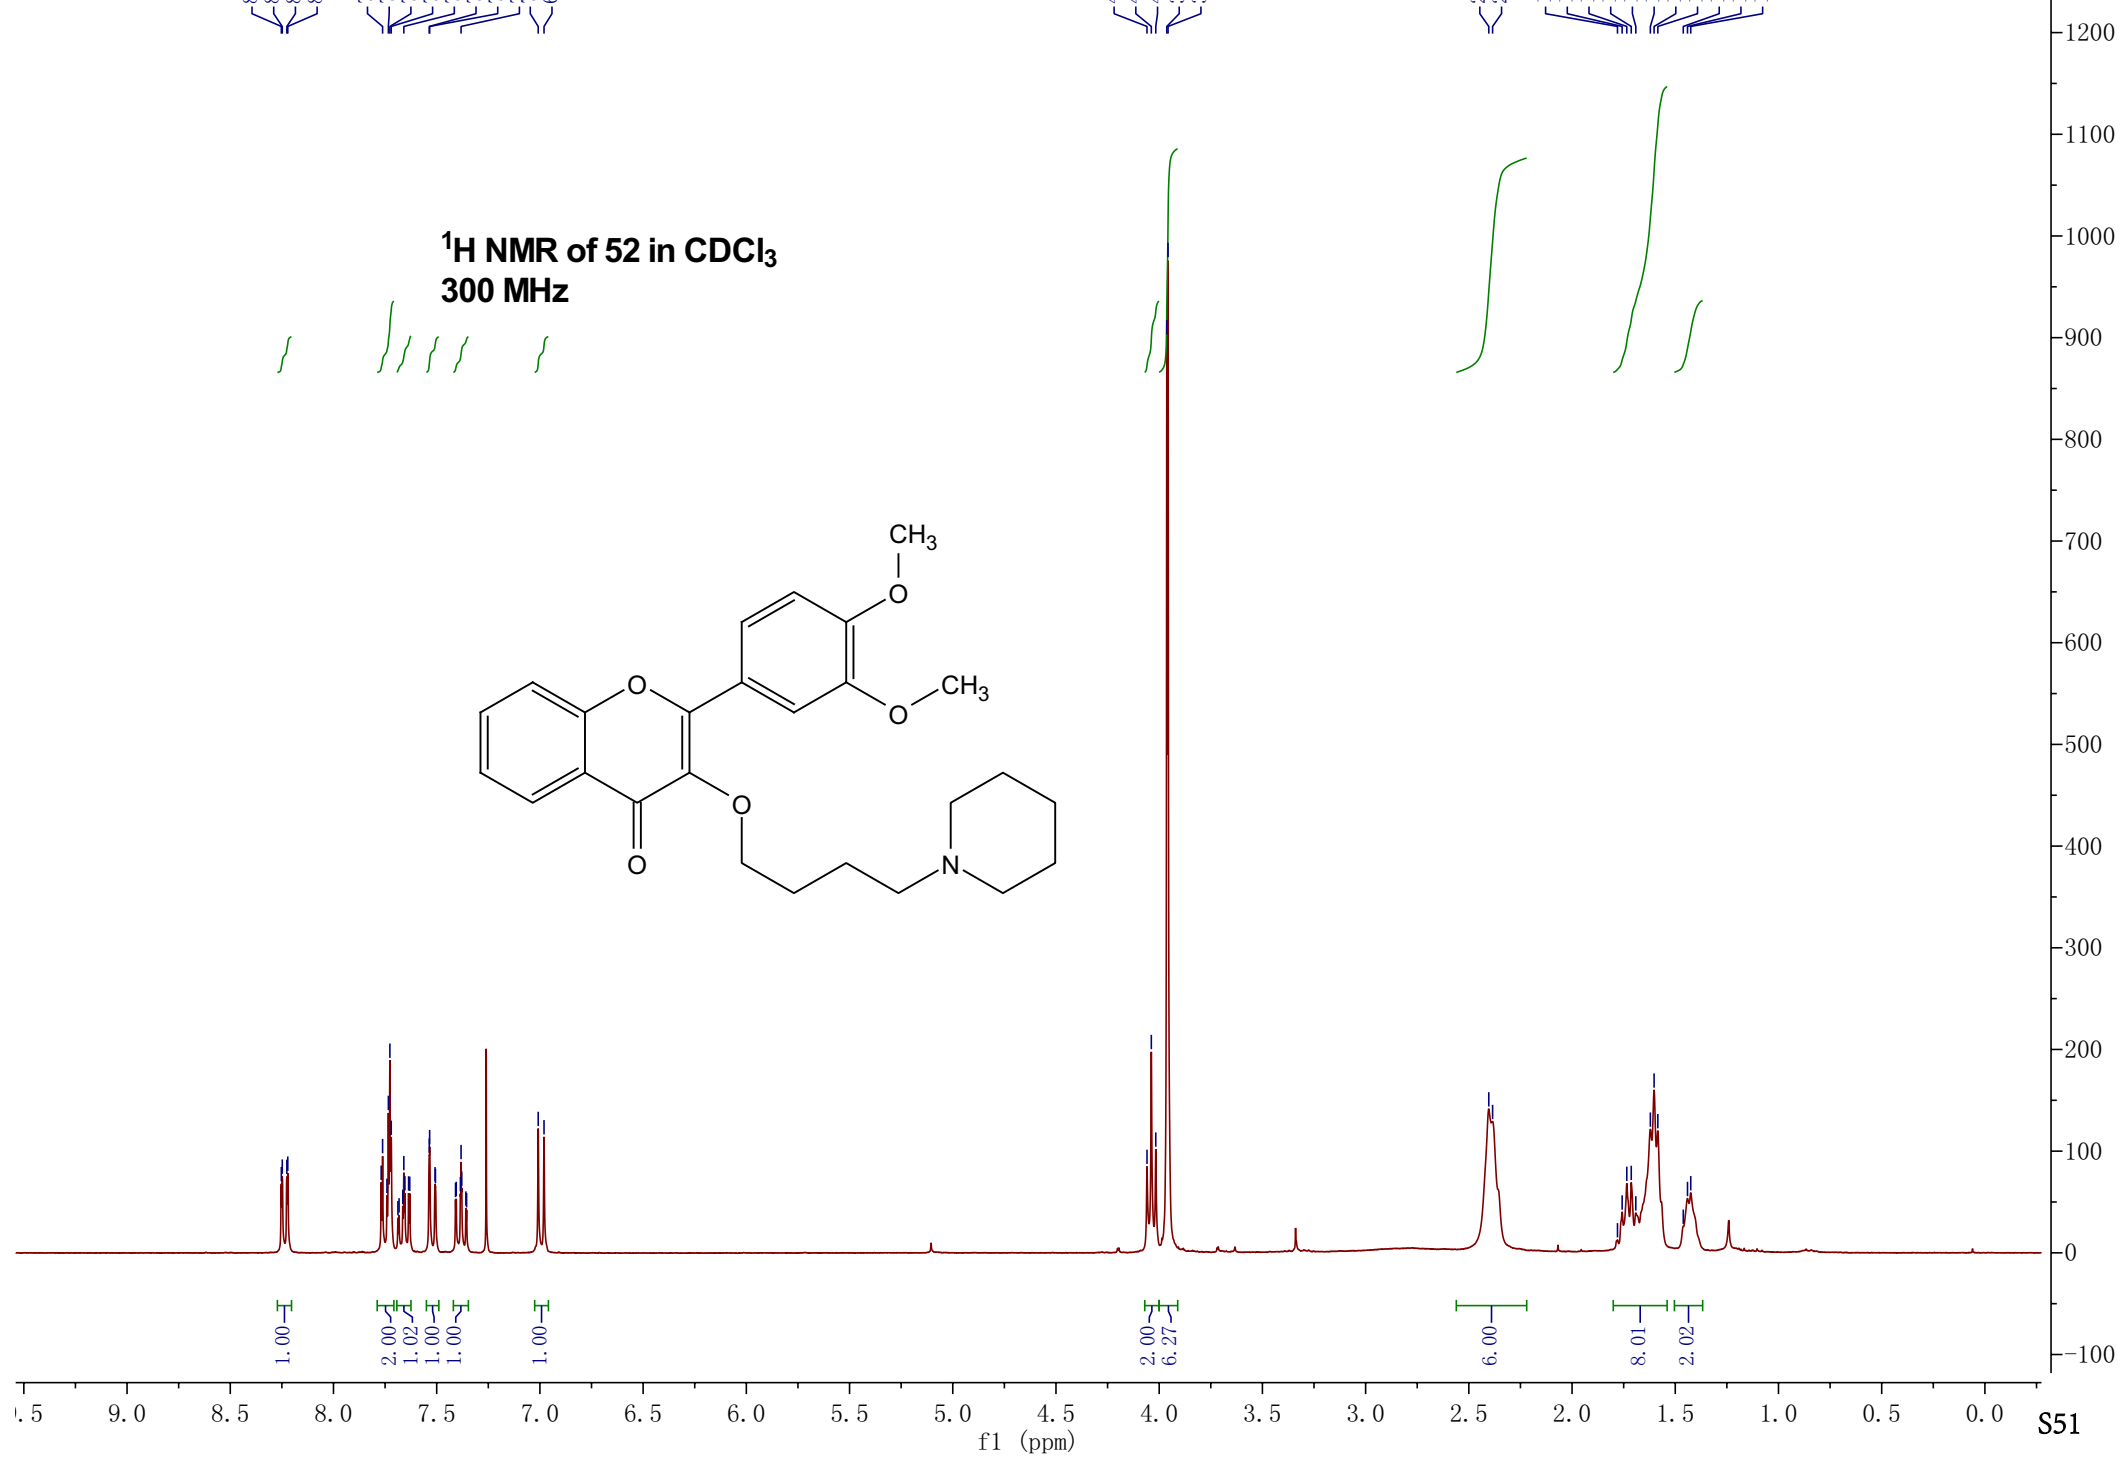

Xiang LI  
XL-35-186-4 CNMR CDCL3 75MHZ (015157)

**<sup>13</sup>C NMR of 52 in CDCl<sub>3</sub>  
75 MHz**

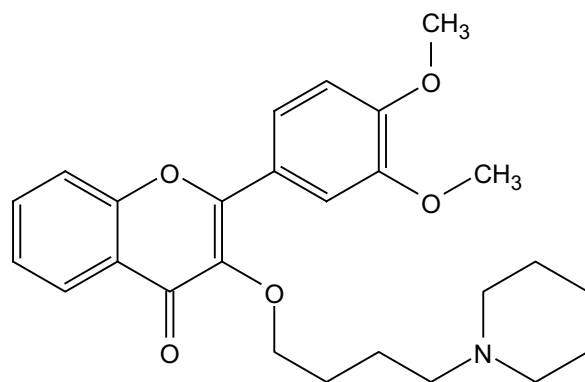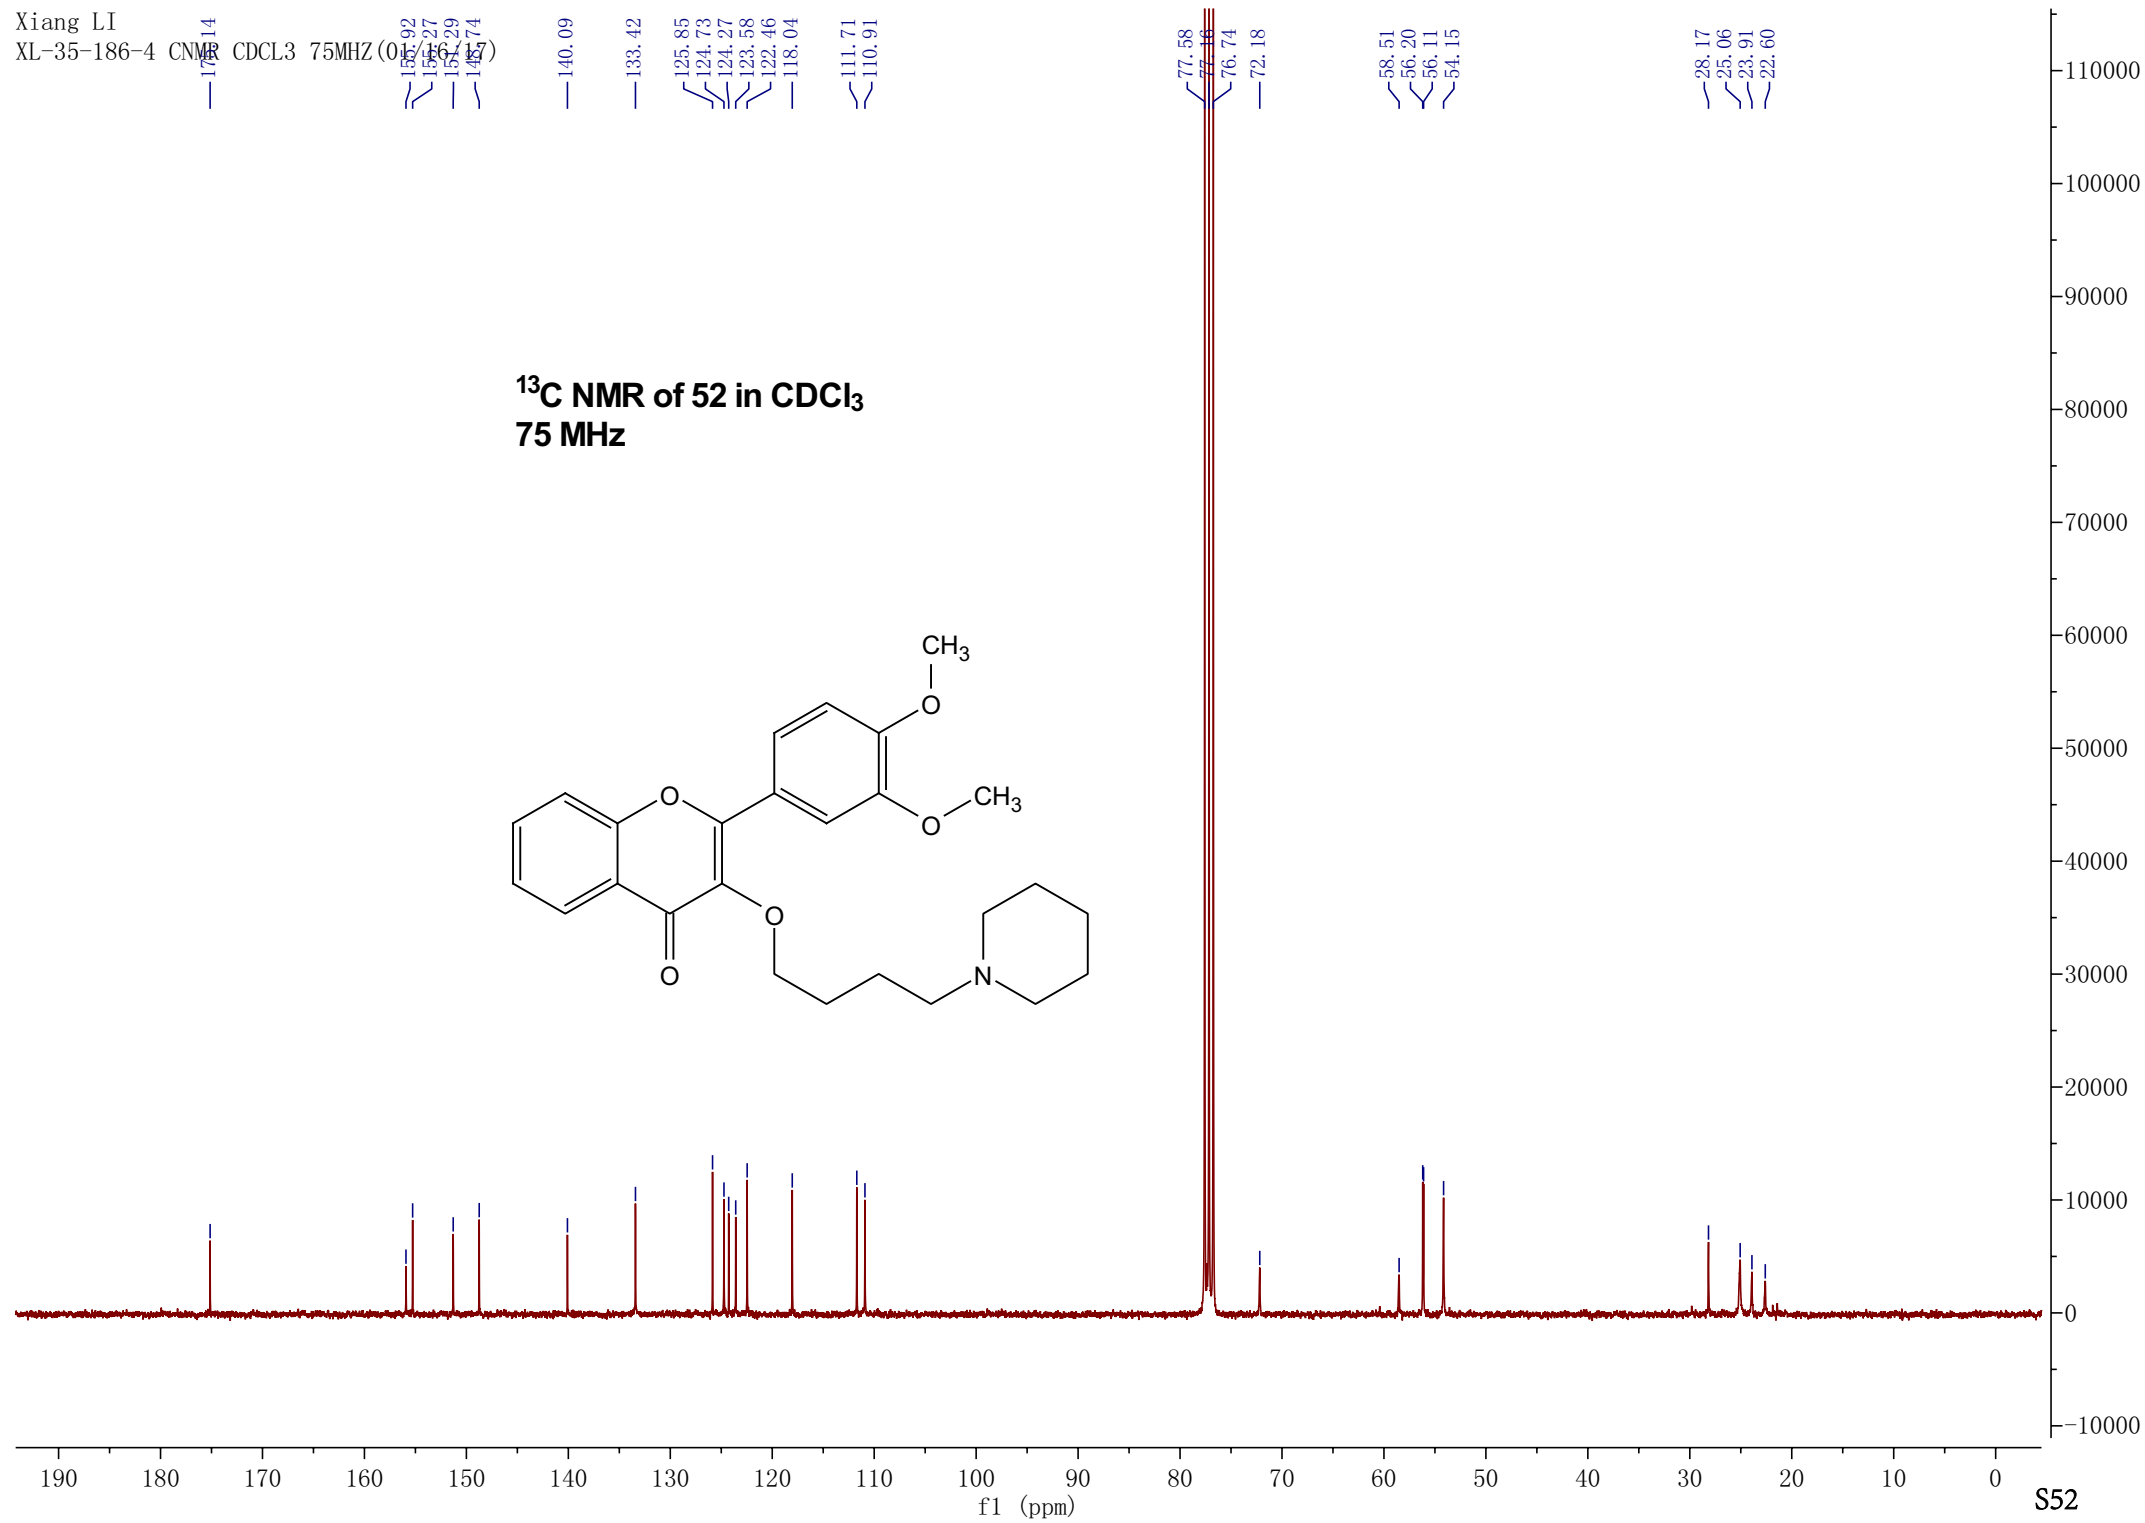



Xiang LI  
XL-35-146-3 HNMR CDCl<sub>3</sub> 300MHz (8/15/16)

**<sup>1</sup>H NMR of 53 in CDCl<sub>3</sub>  
300 MHz**

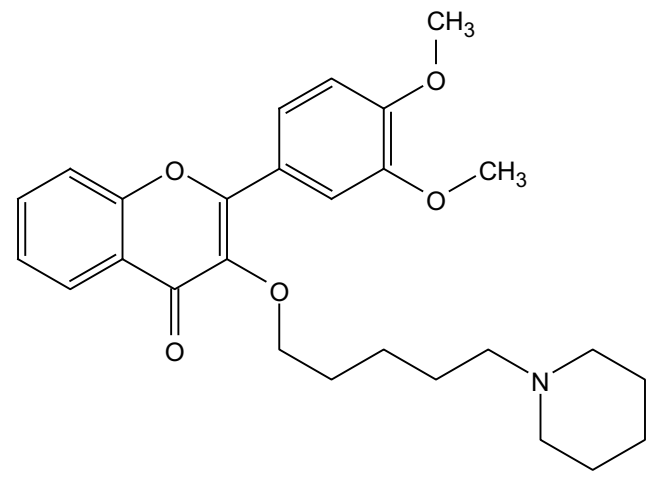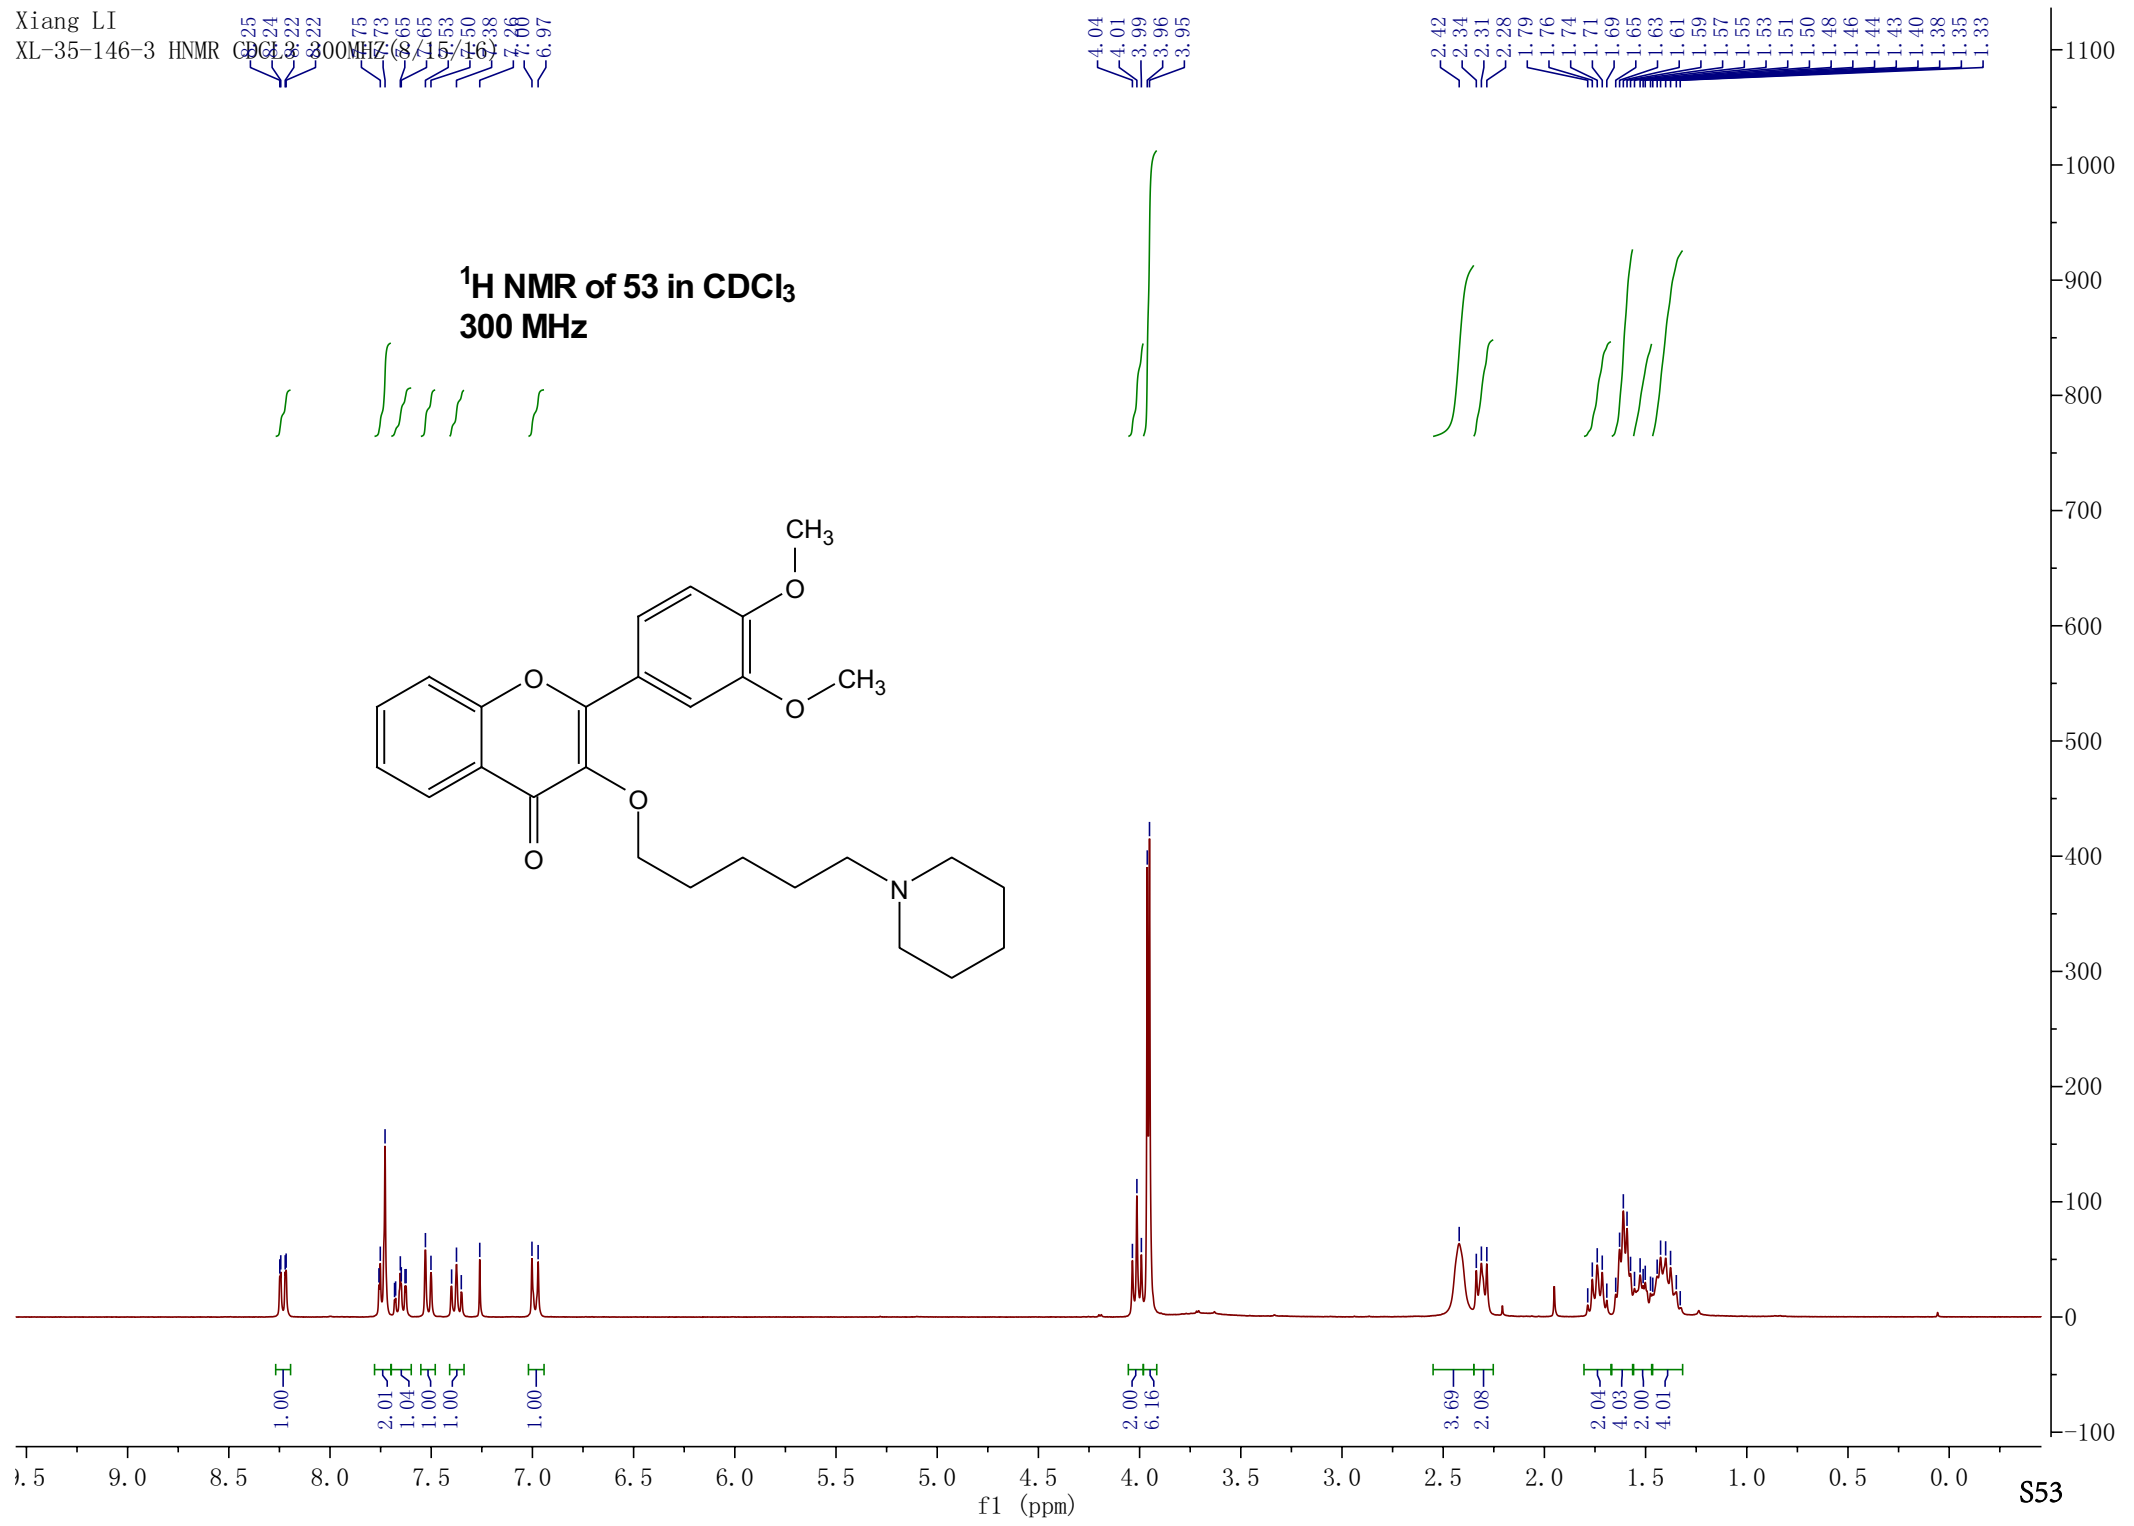

Xiang LI  
XL-35-146-3 NMR CDCL3 75MHZ (8)

**<sup>13</sup>C NMR of 53 in CDCl<sub>3</sub>  
75 MHz**

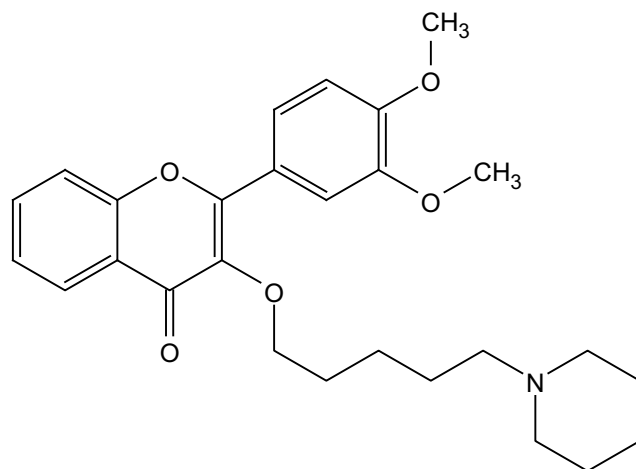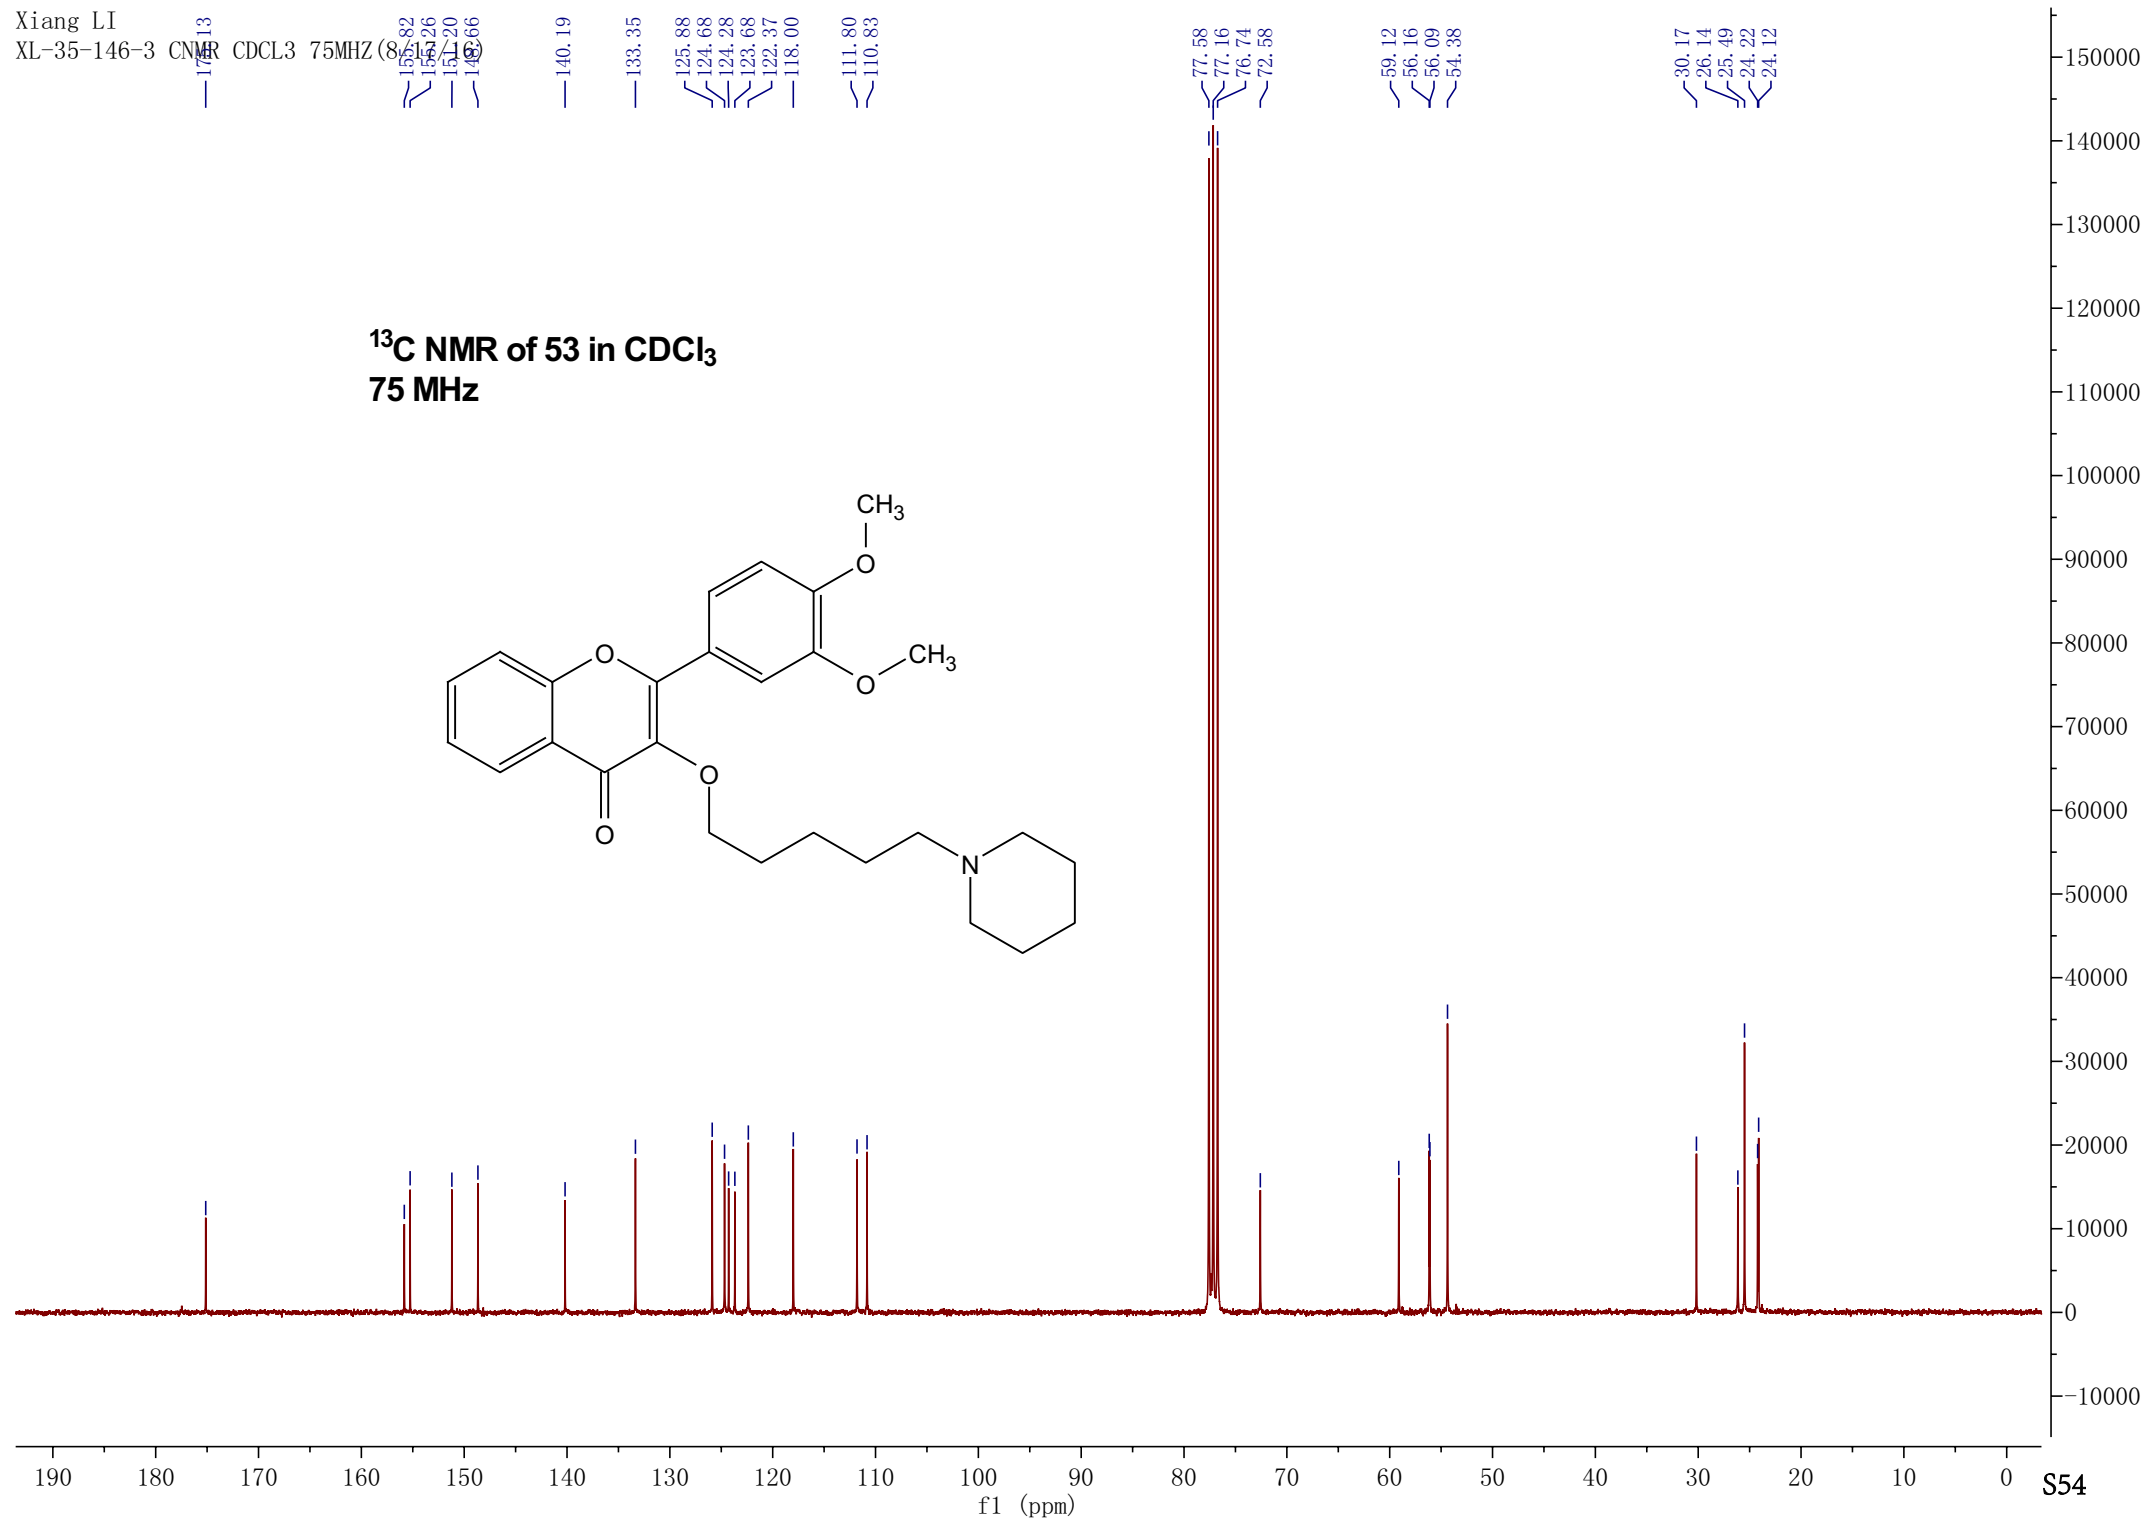

Xiang LI

XL-35-102-4 HNMR CDCl<sub>3</sub> 300MHz

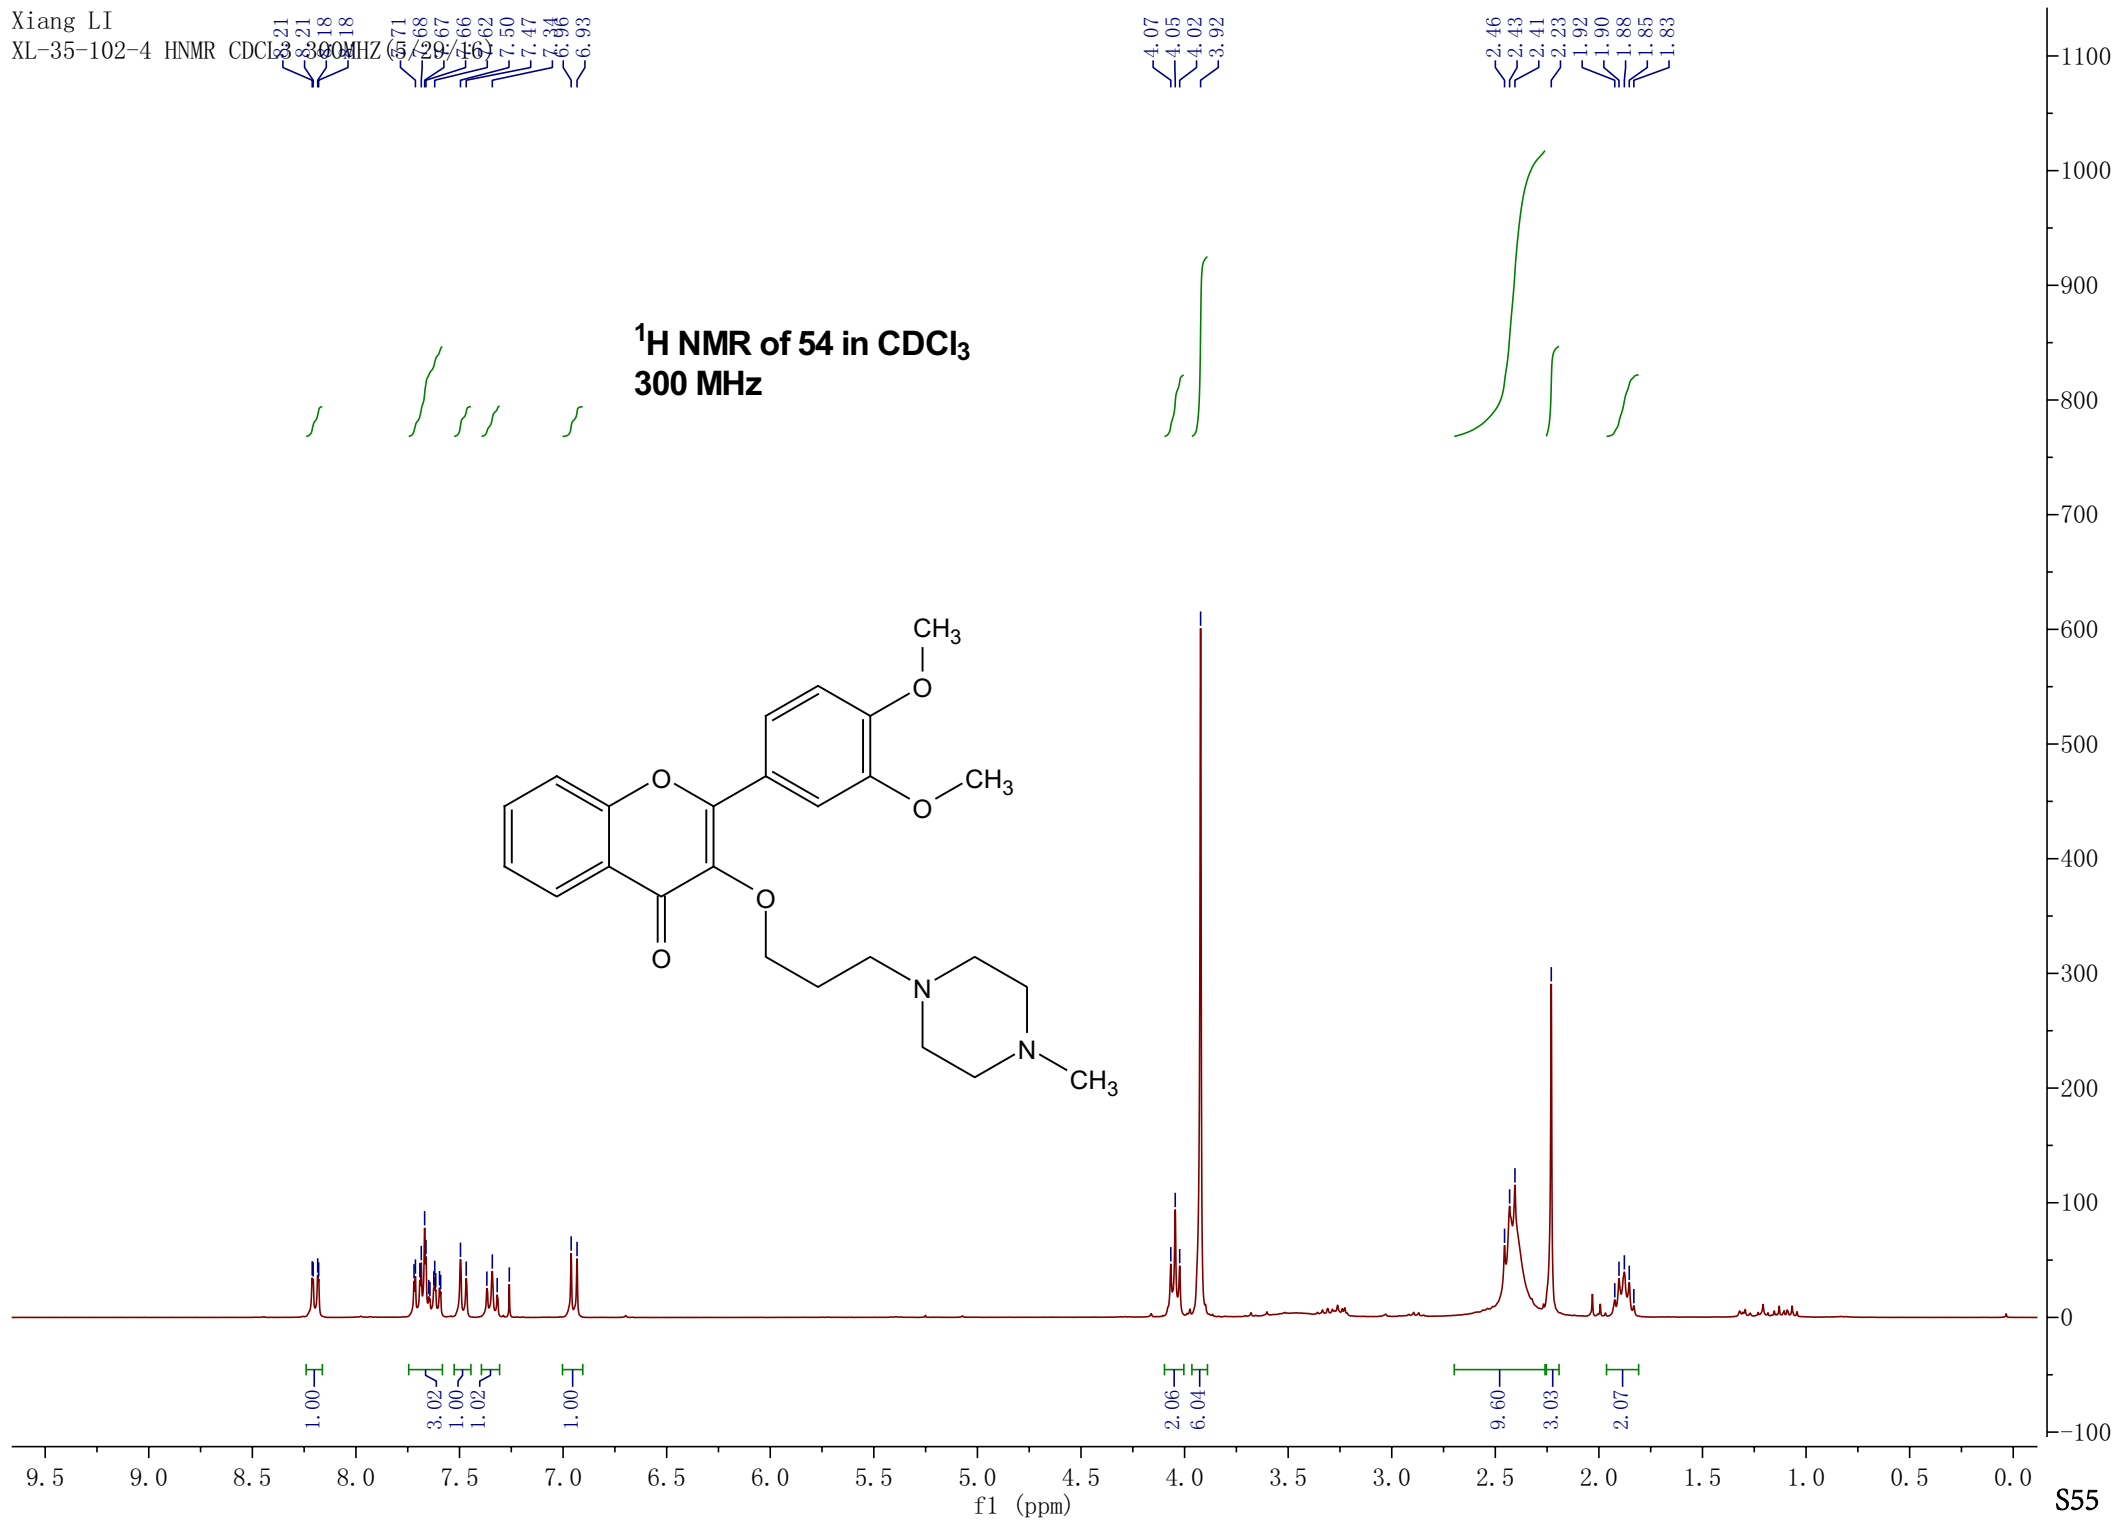

Xiang LI  
XL-35-102-4 CNMR CDCL3 75MHZ (5/29/16)

**<sup>13</sup>C NMR of 54 in CDCl<sub>3</sub>  
75 MHz**

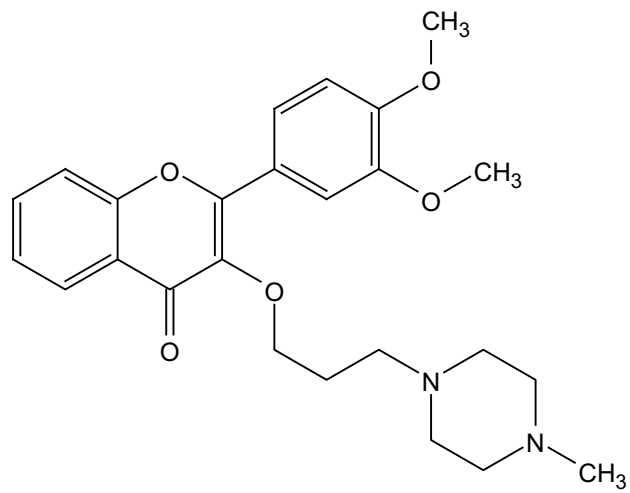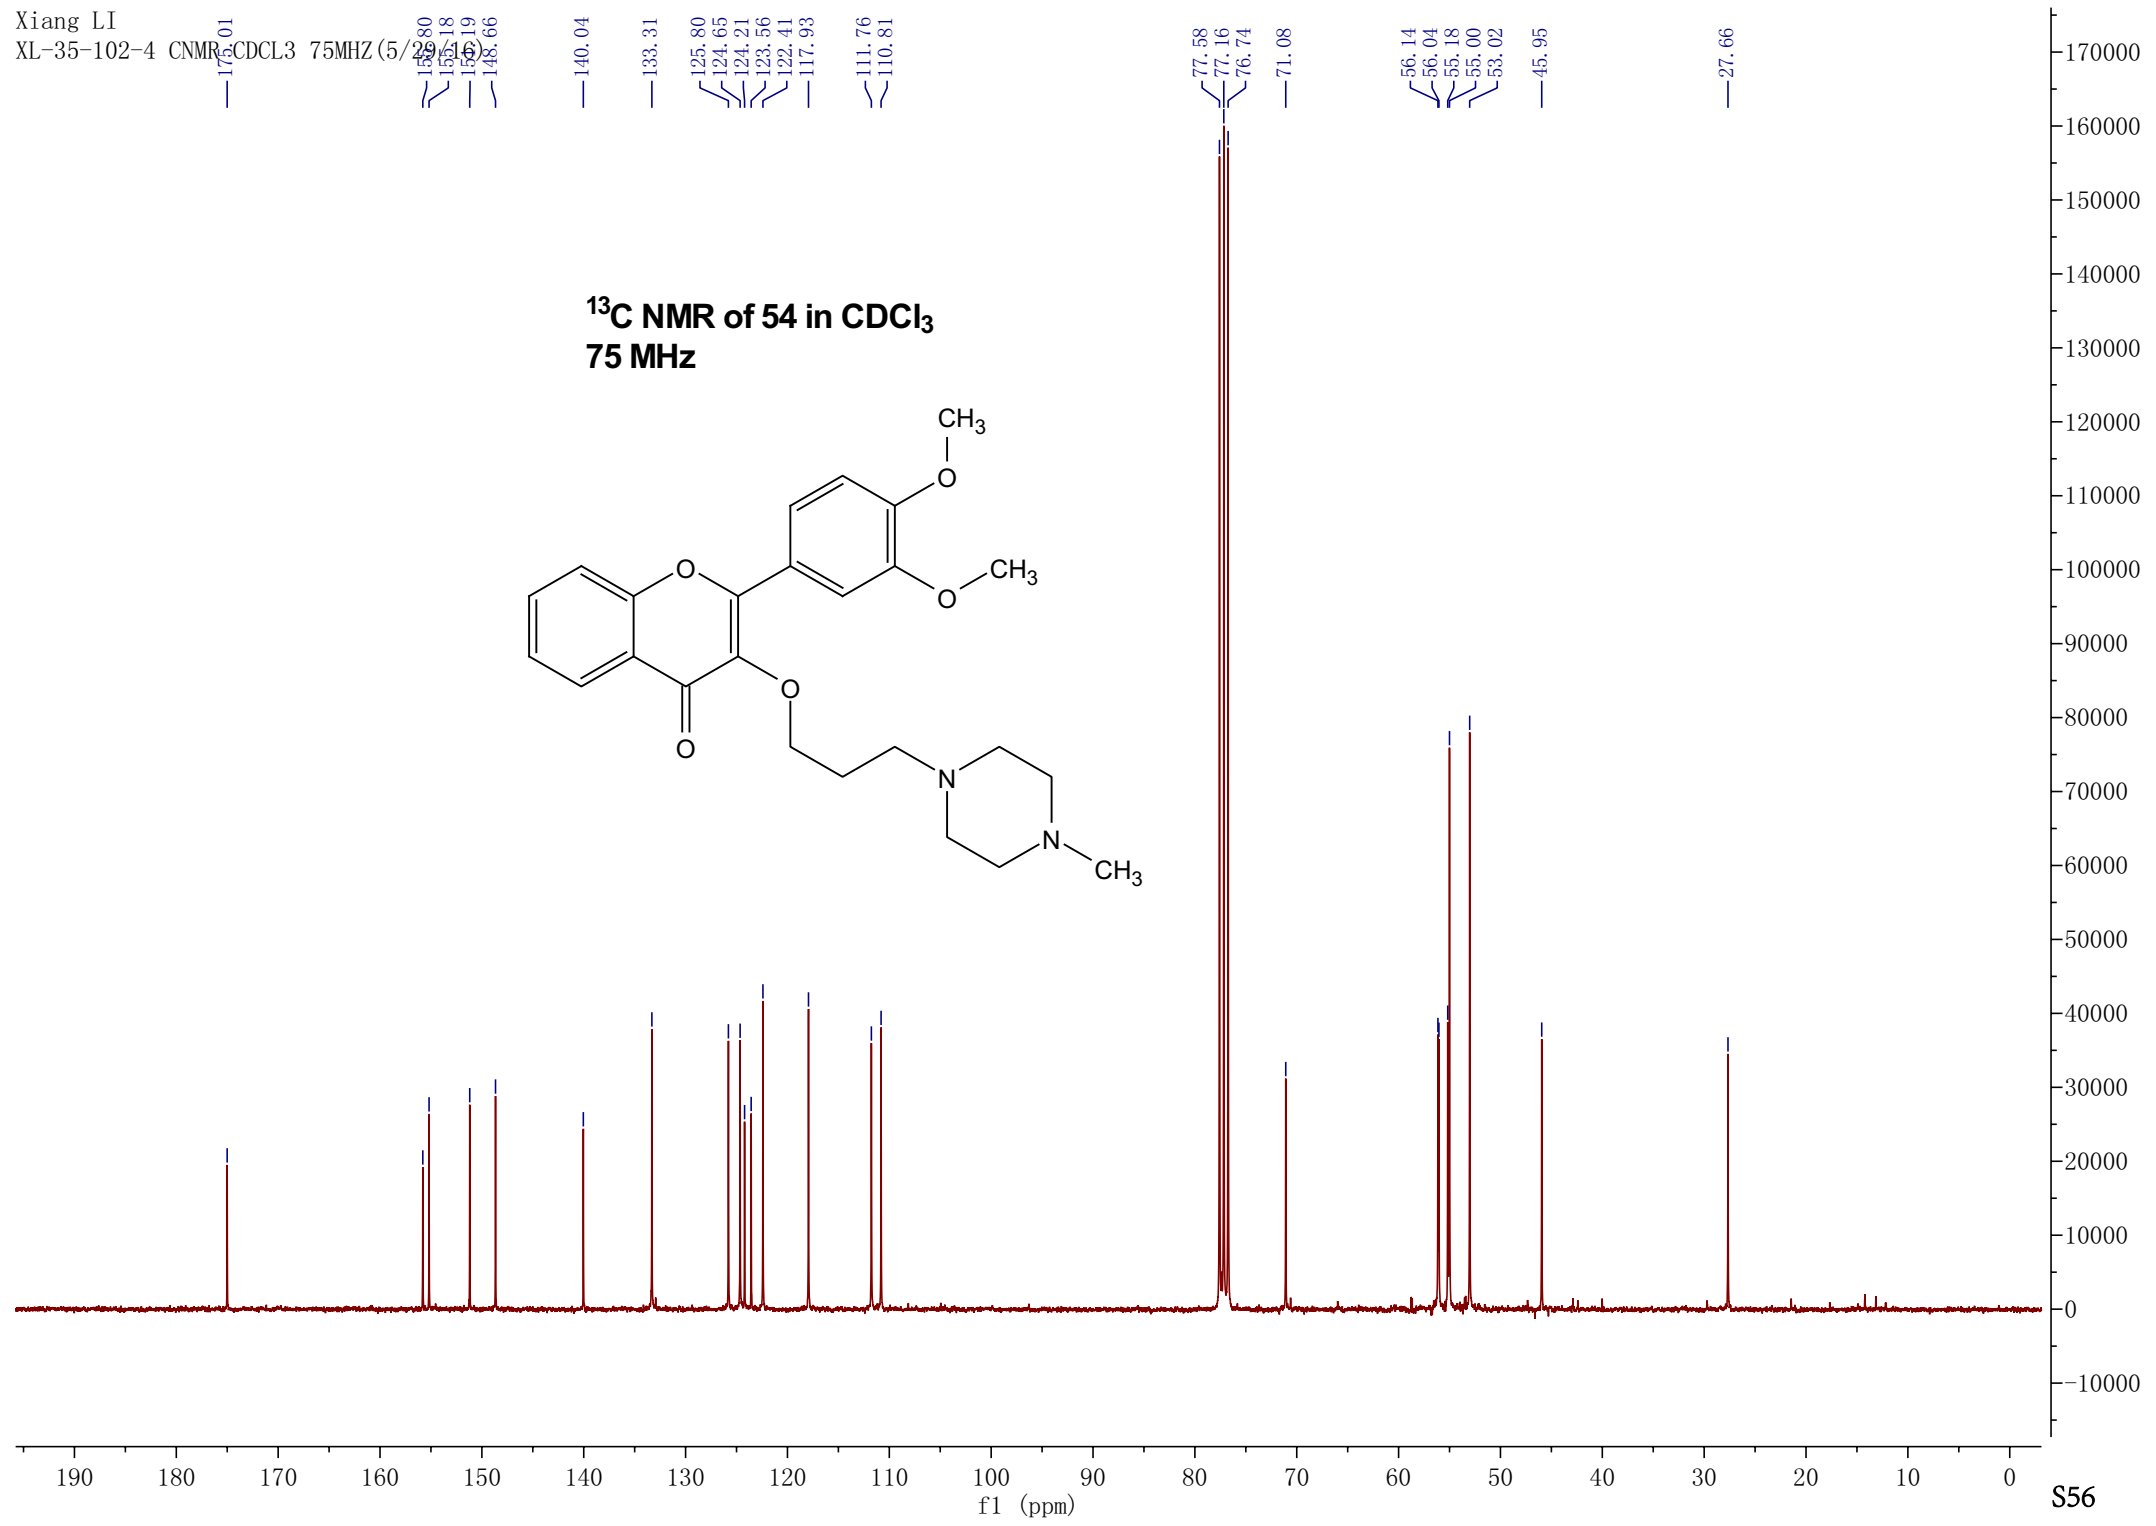

Xiang LI  
XL-35-103-4 HNMR CDCl<sub>3</sub> 300MHz (5/30/16)

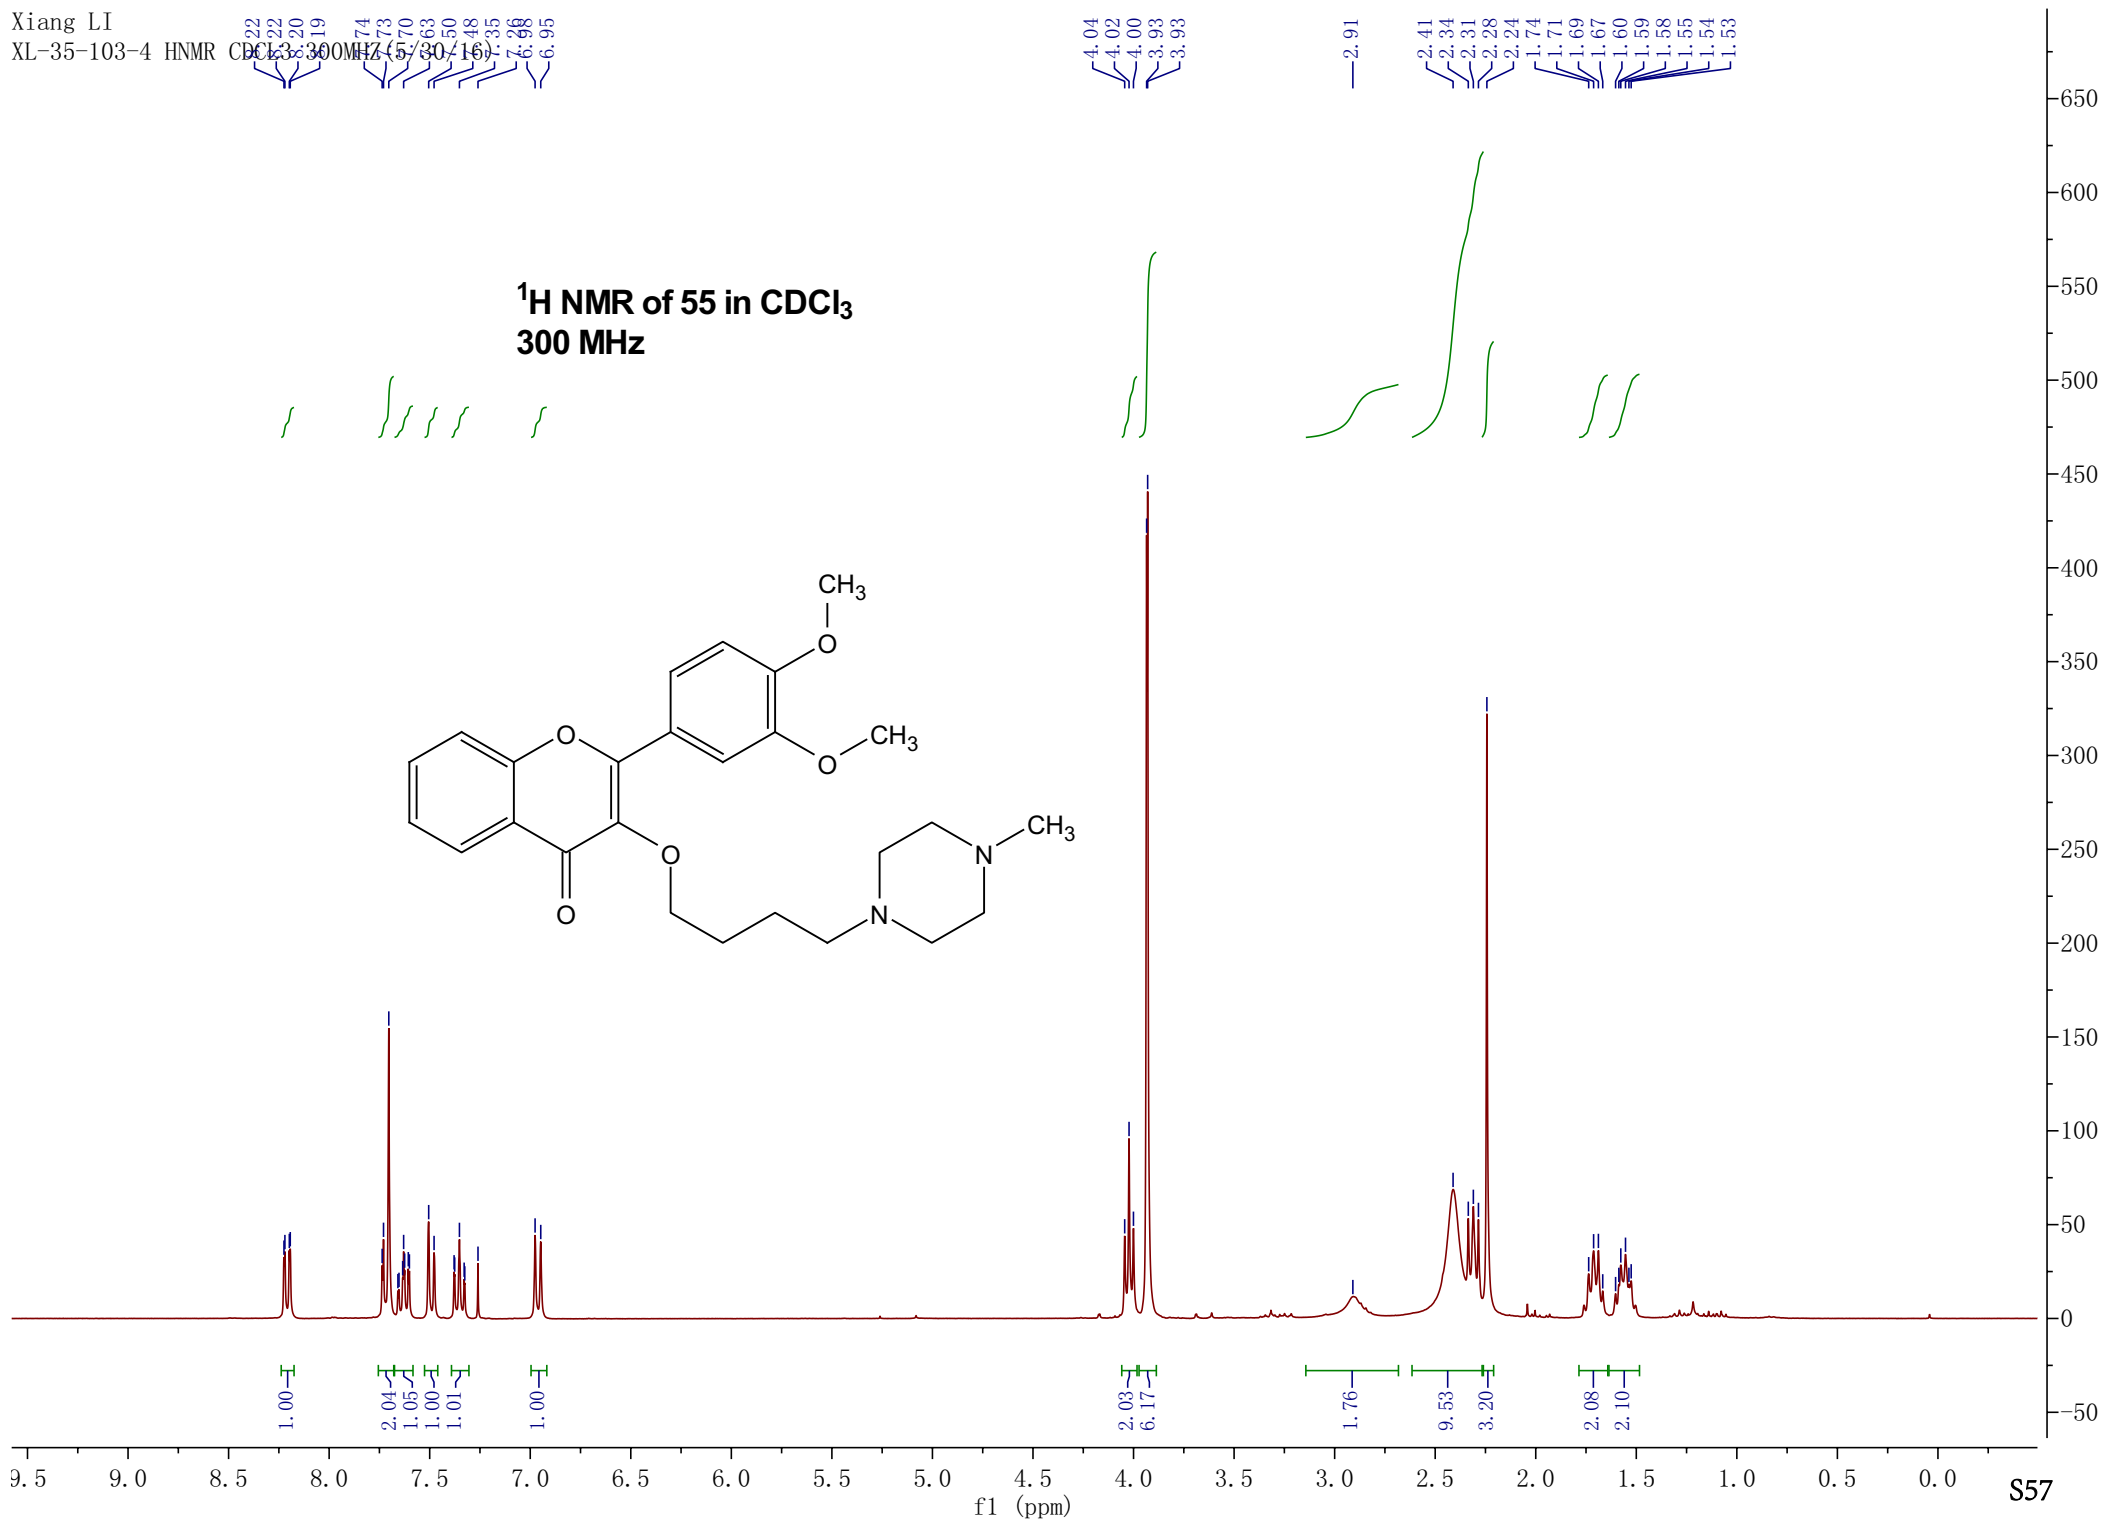

Xiang LI  
XL-35-103-4 CNMR CDCL3 75MHZ (5/30/16)

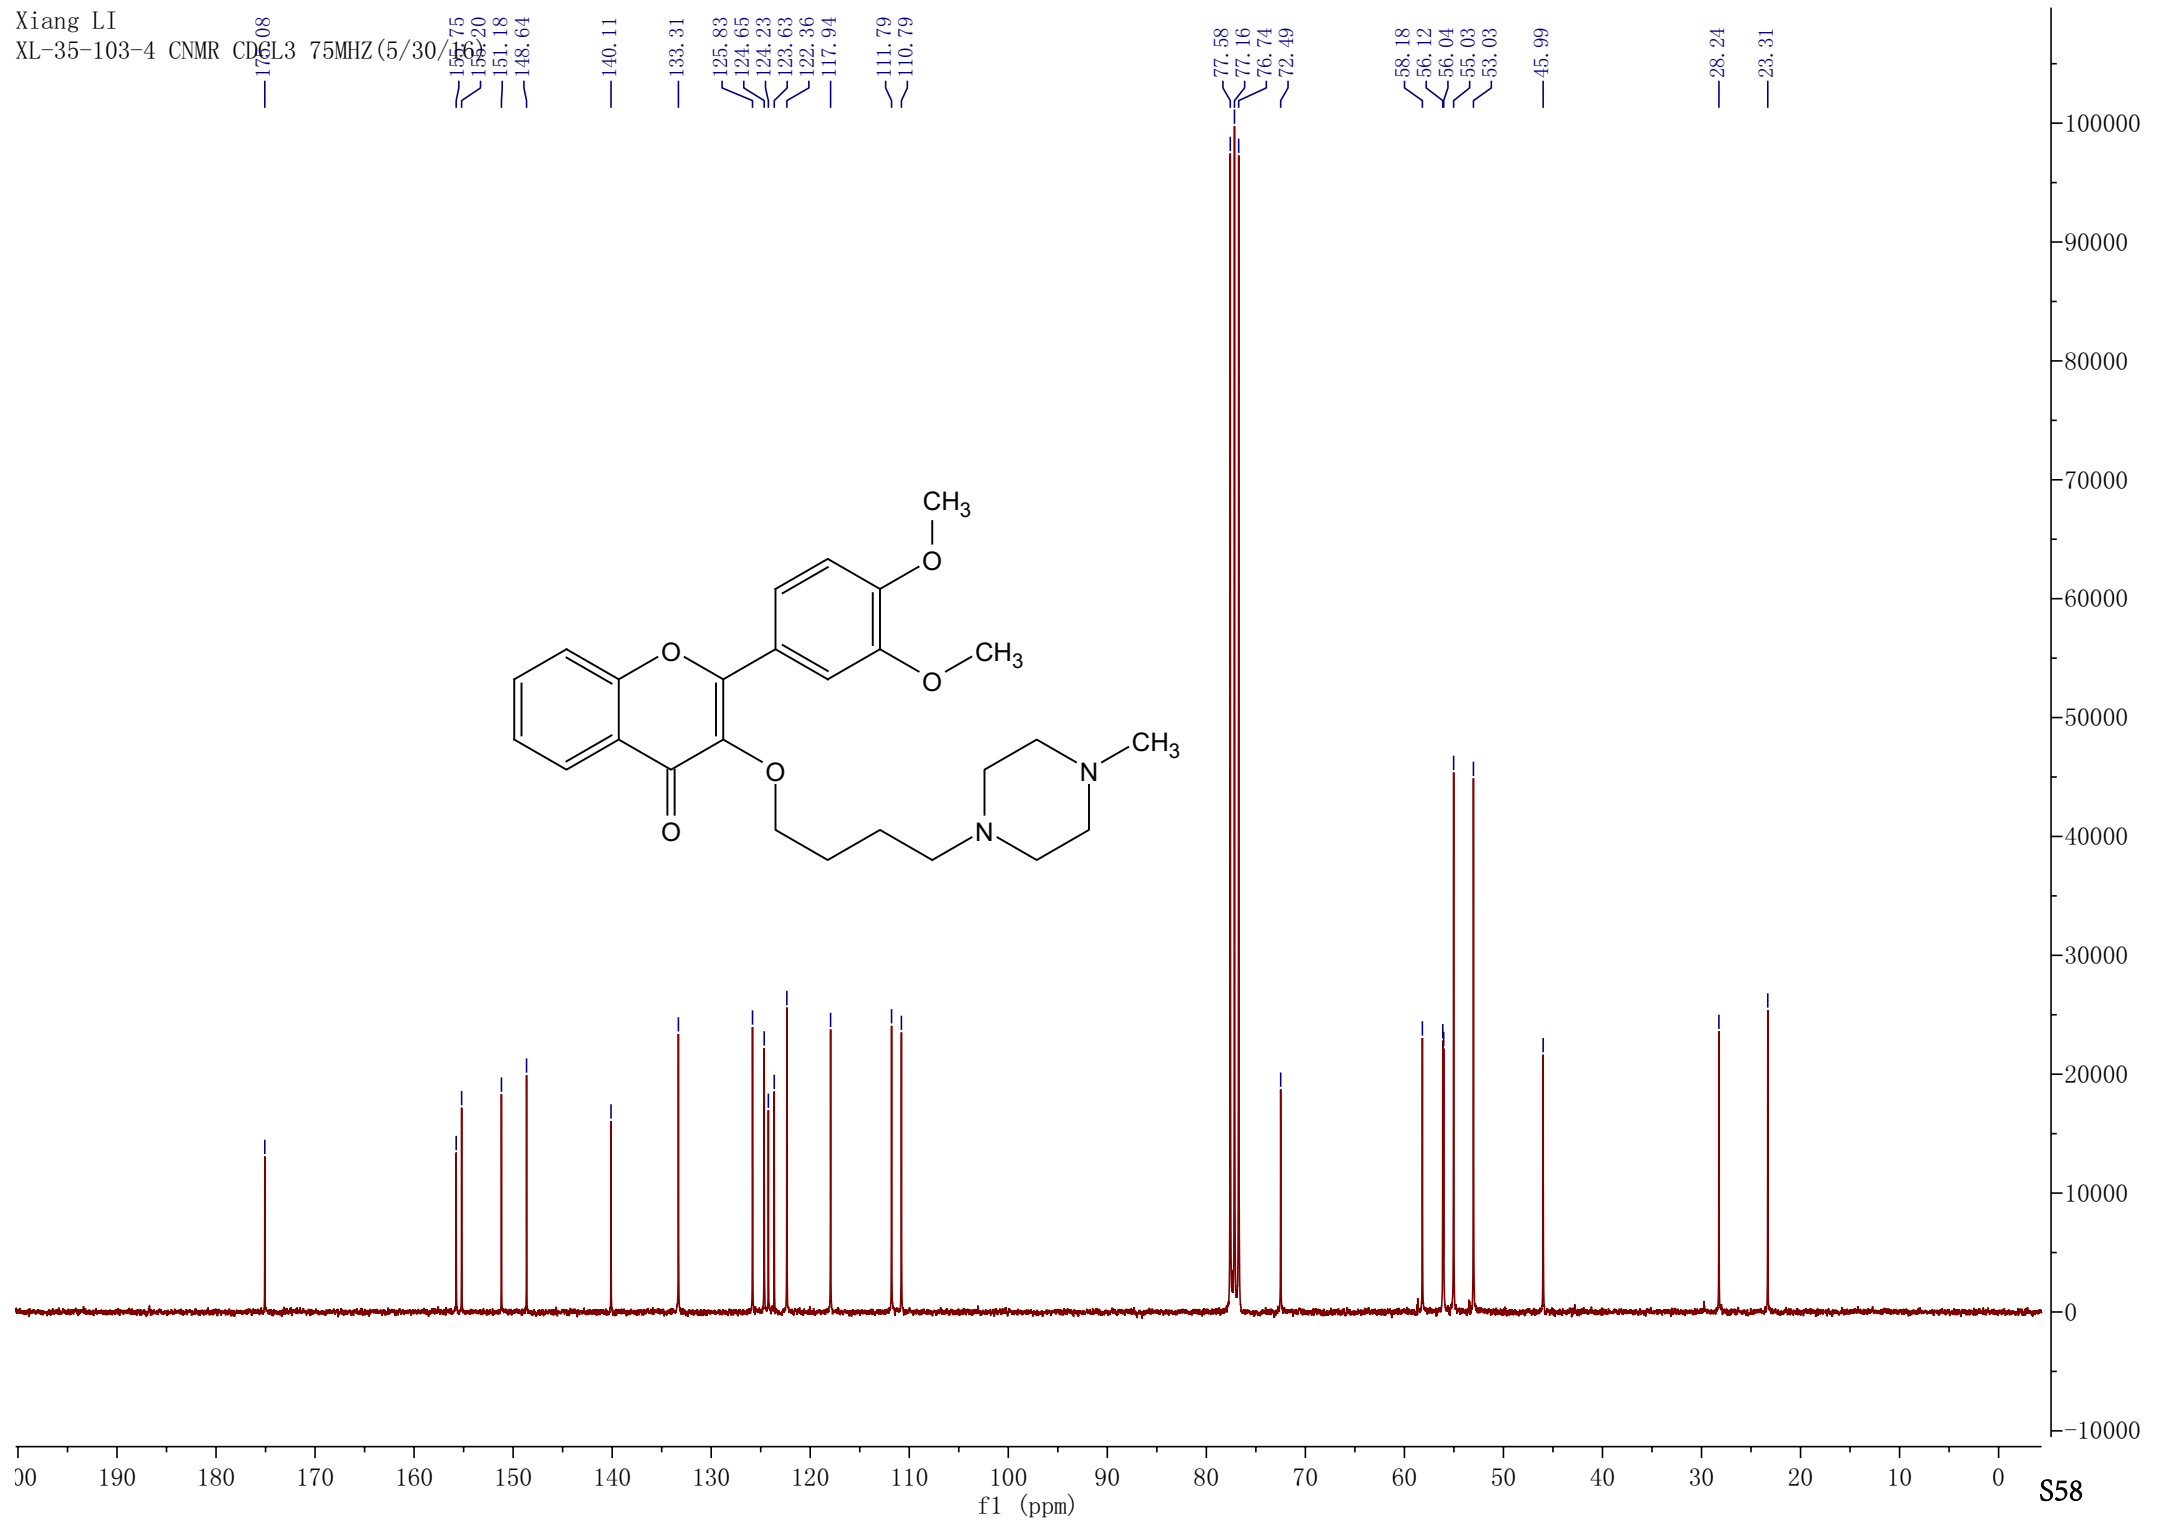

Xiang LI  
XL-35-101-4 HNMR CDCl<sub>3</sub> 300MHz (5/28/16)

7.23  
7.20  
7.73  
7.72  
7.71  
7.63  
7.51  
7.48  
7.35  
6.98  
6.96  
6.95

4.02  
4.00  
3.98  
3.94  
3.93

2.44  
2.30  
2.27  
2.25

1.74  
1.72  
1.70  
1.46  
1.45  
1.42  
1.39  
1.36  
1.35

**<sup>1</sup>H NMR of 56 in CDCl<sub>3</sub>  
300 MHz**

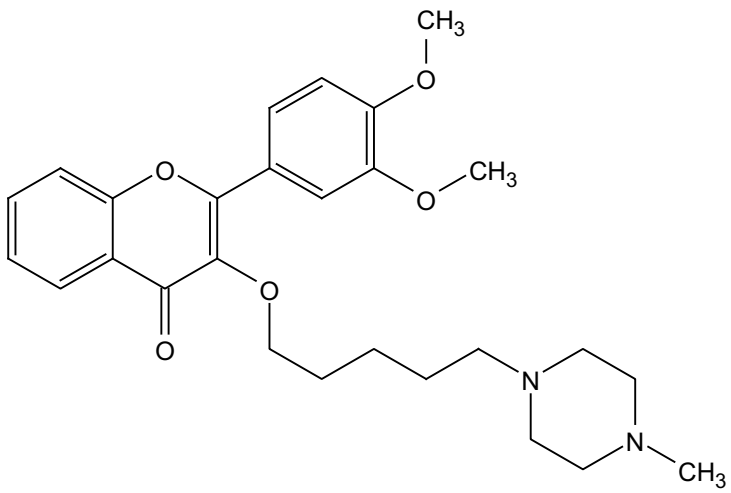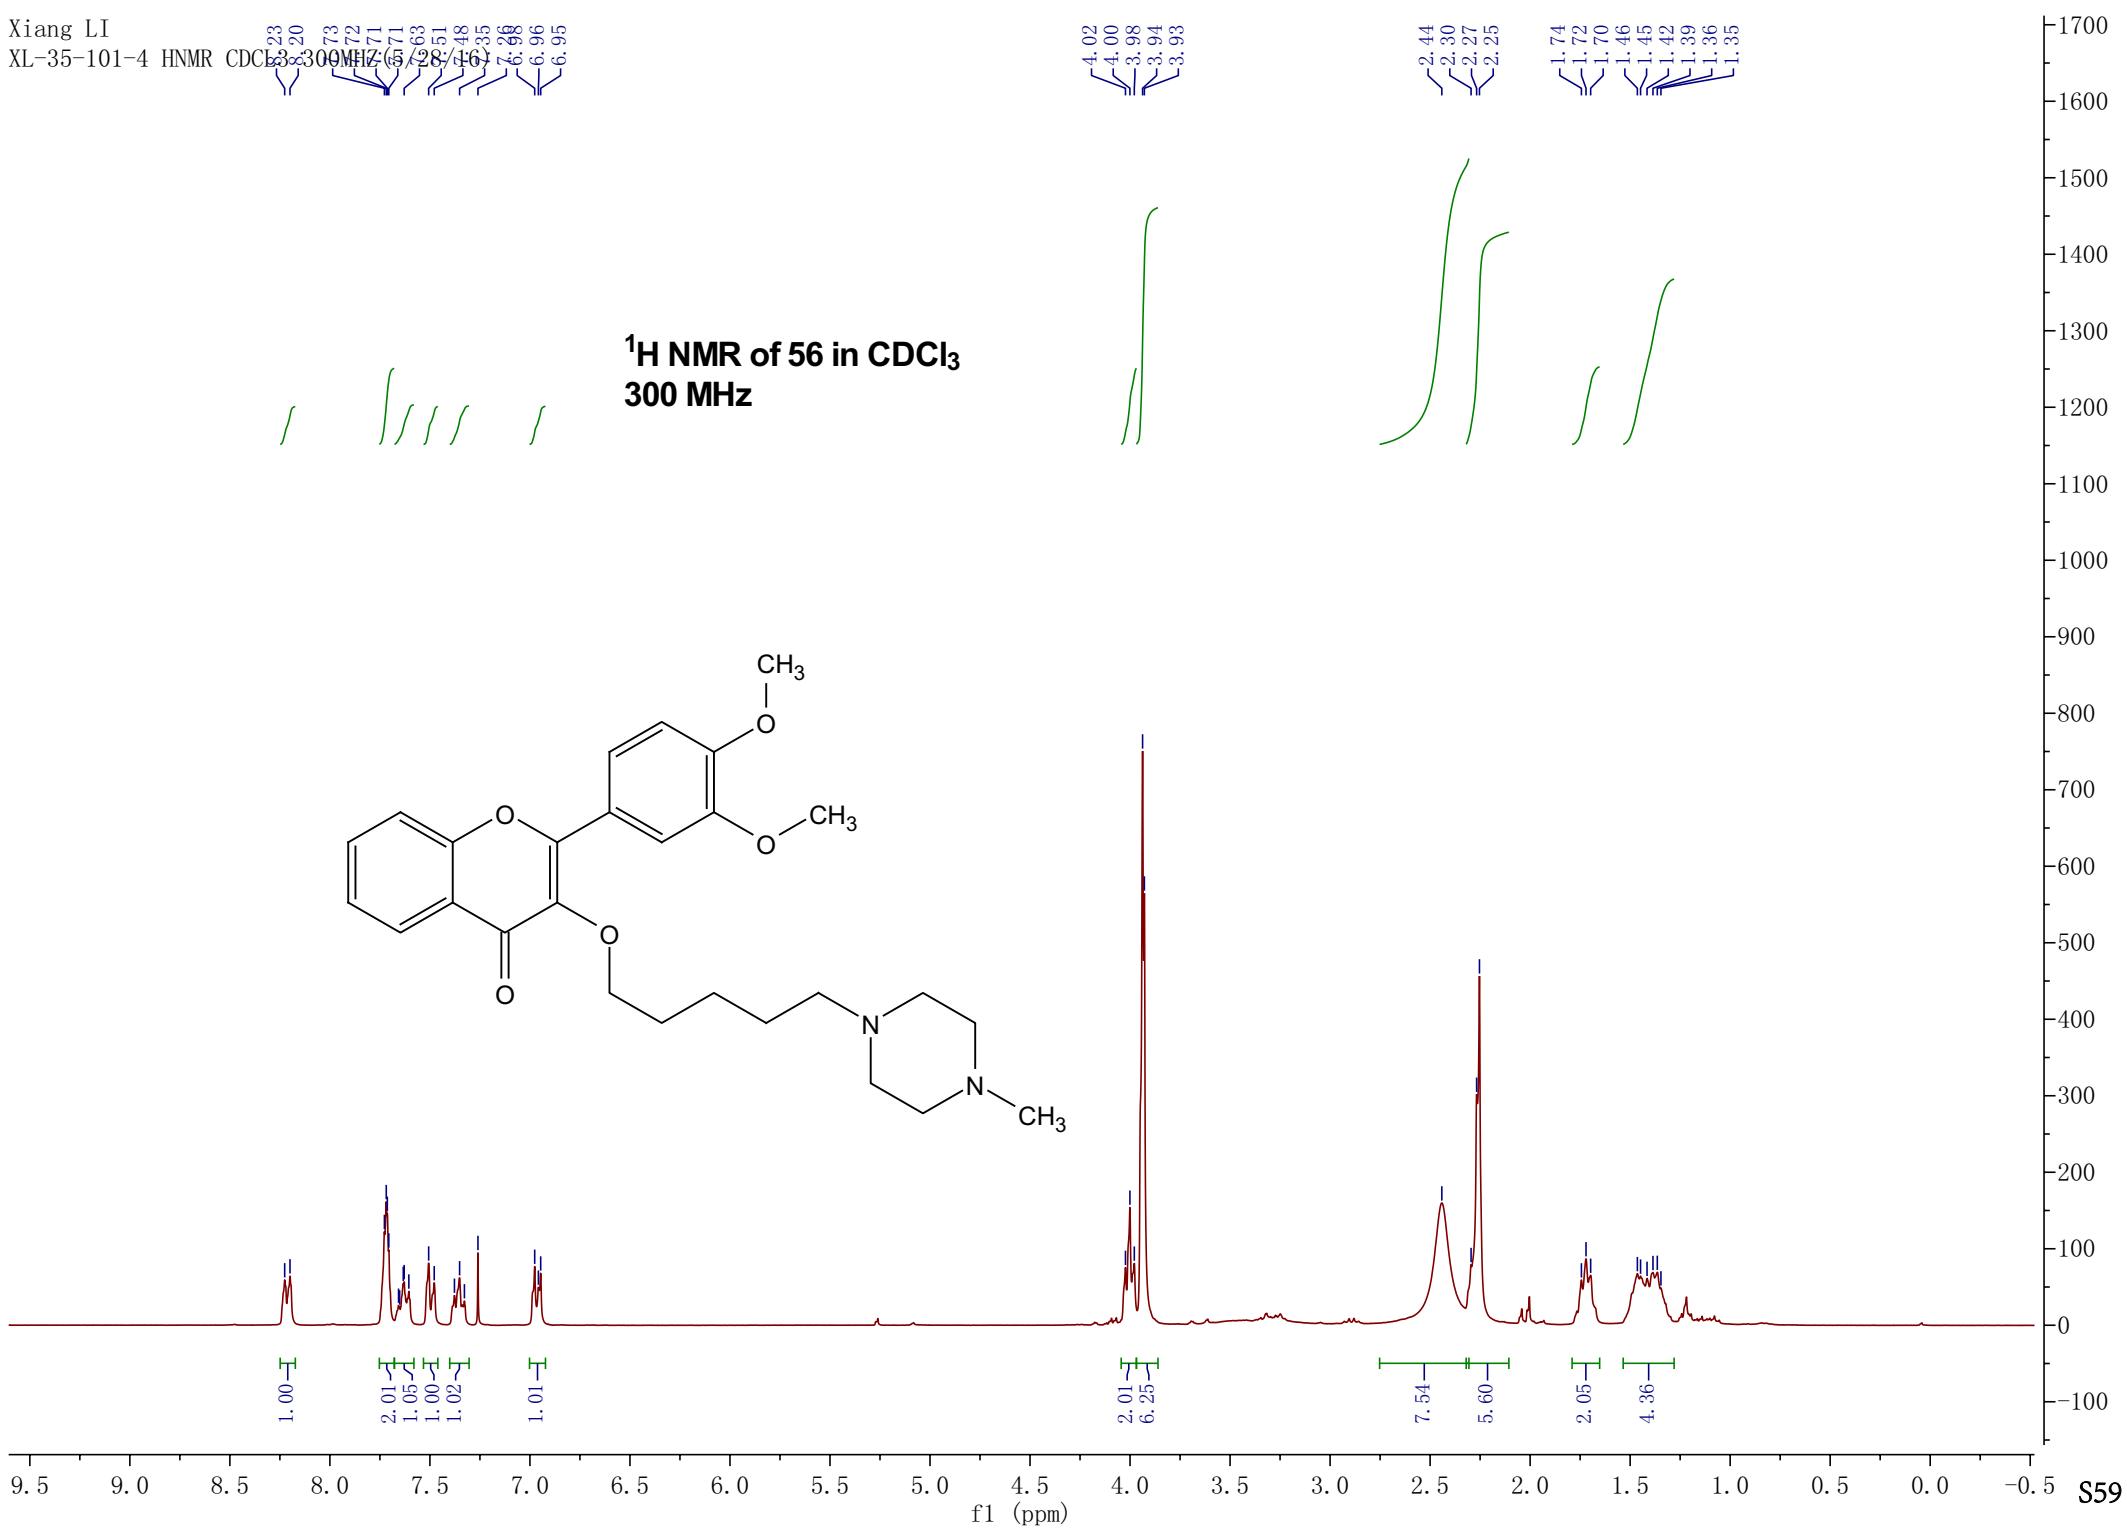

Xiang LI  
XL-35-101-4 NMR CDCL3 75MHZ

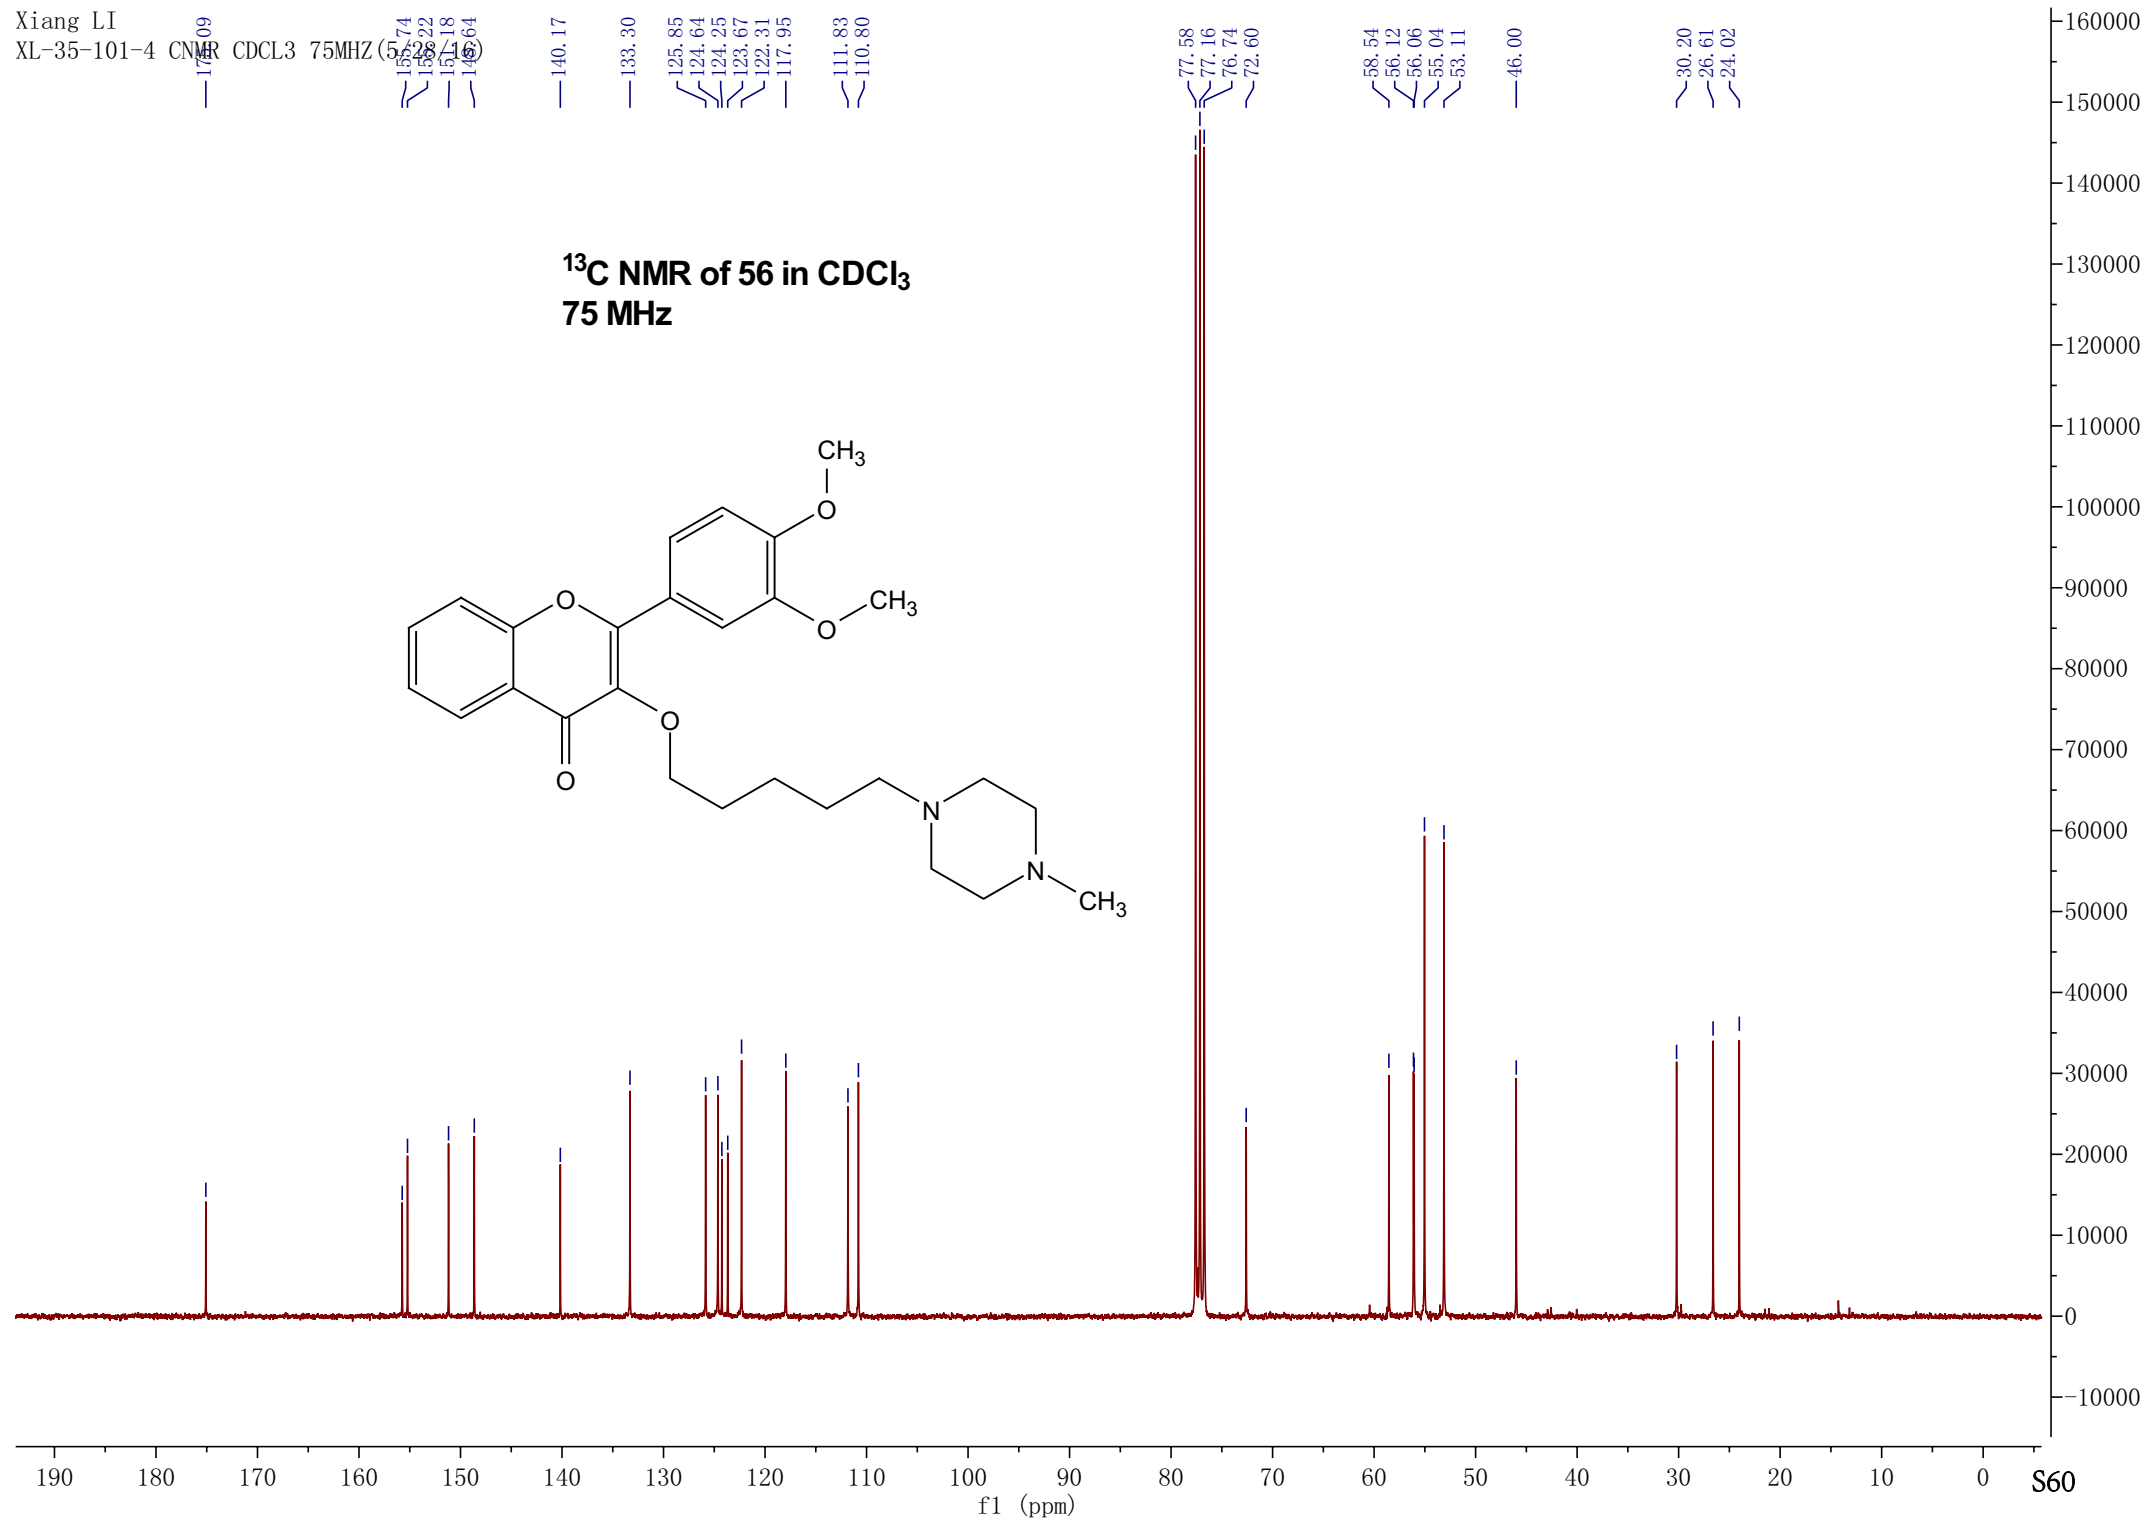



Xiang LI  
XL-35-121-5 HNMR CDCl<sub>3</sub> 300MHz (6/21/16)

7.24  
7.24  
7.22  
7.21  
7.75  
7.74  
7.74  
7.73  
6.65  
6.52  
6.37  
6.99  
6.96

4.03  
4.01  
3.99  
3.96  
3.94

2.81  
2.48  
2.33  
2.30  
2.28  
1.76  
1.74  
1.72  
1.69  
1.67  
1.50  
1.48  
1.45  
1.43  
1.42  
1.41  
1.40  
1.38  
1.36  
1.34  
1.31  
1.29  
1.26  
1.23

**<sup>1</sup>H NMR of 57 in CDCl<sub>3</sub>  
300 MHz**

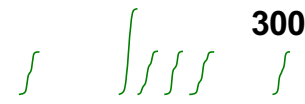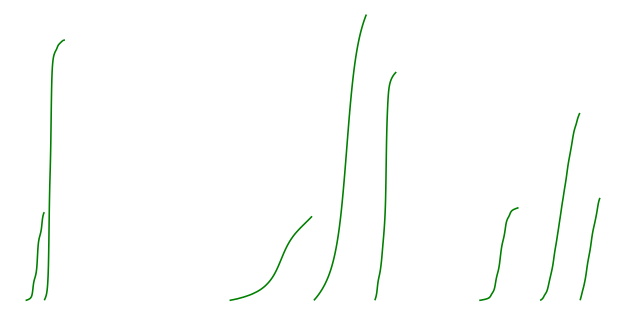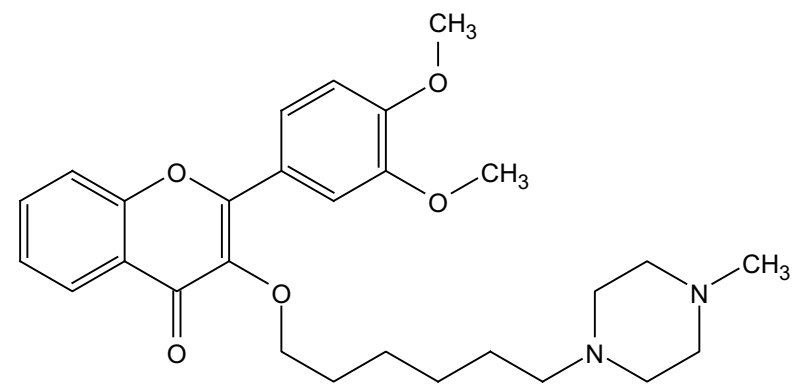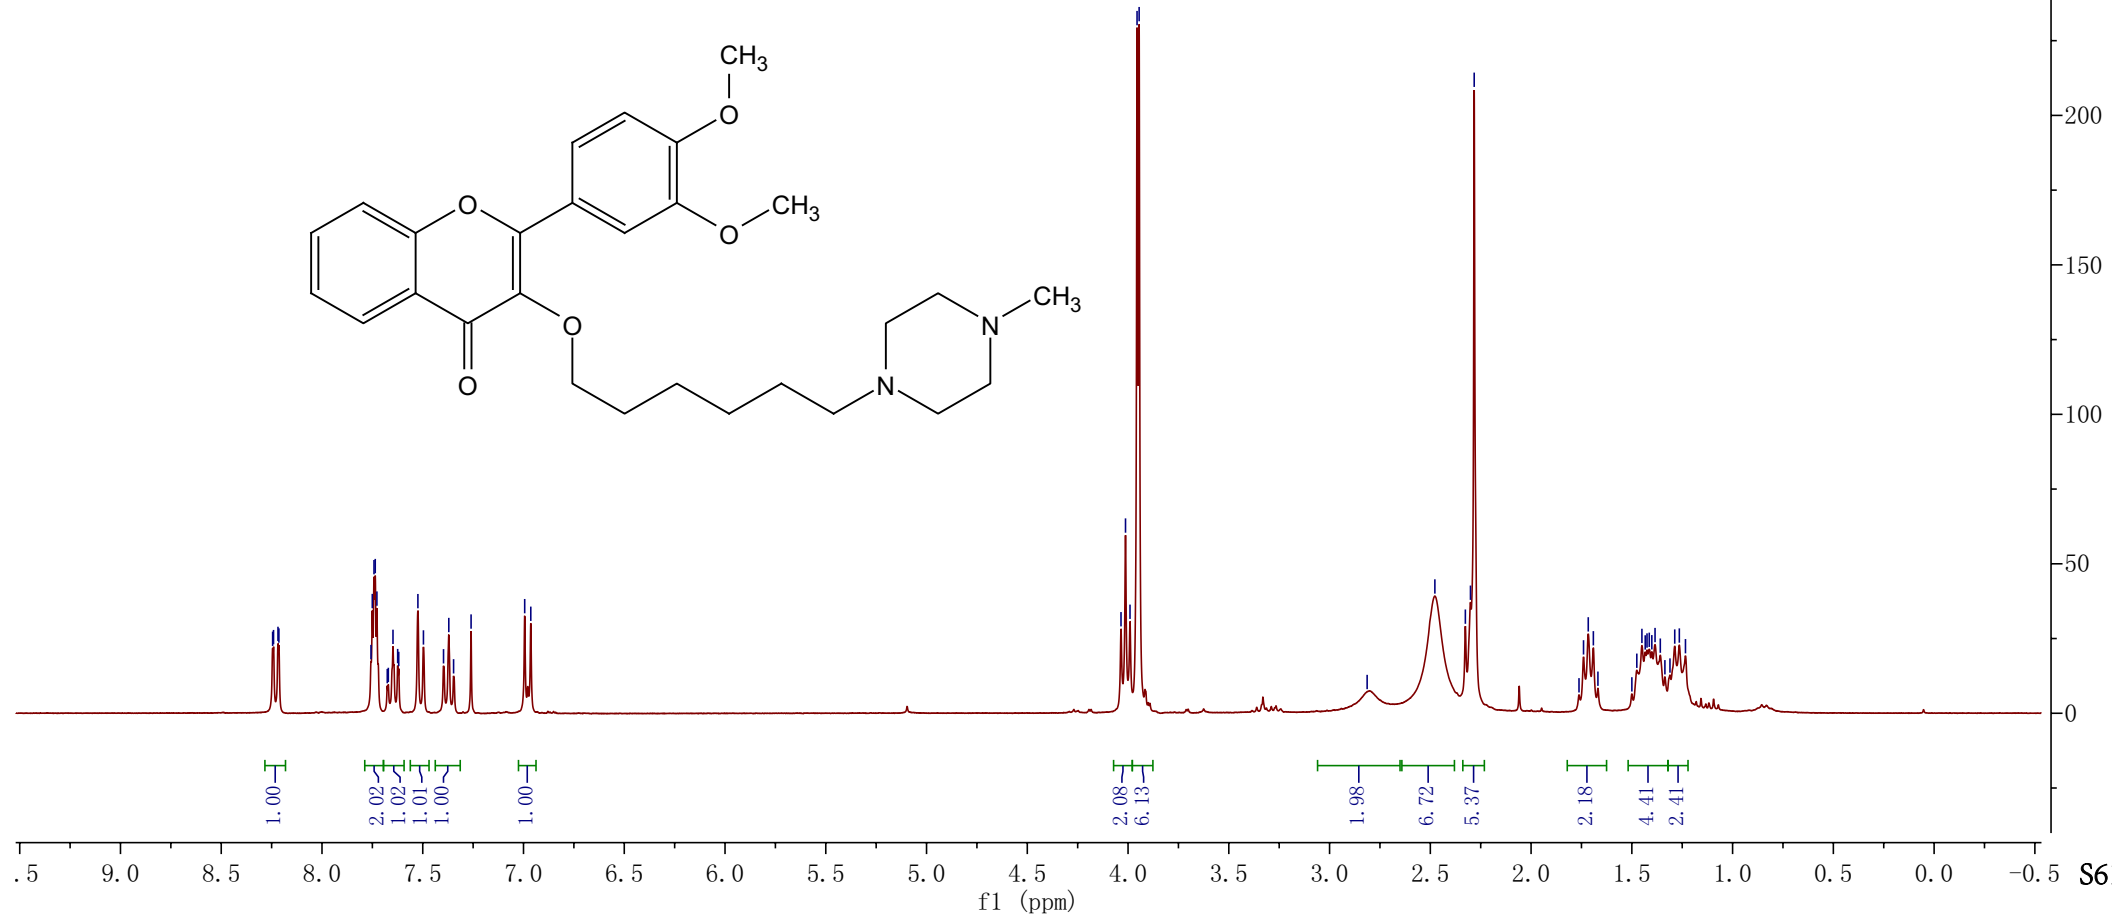

Xiang LI  
XL-35-121-5 CNMR, CDCL3 75MHZ (6/25/16)

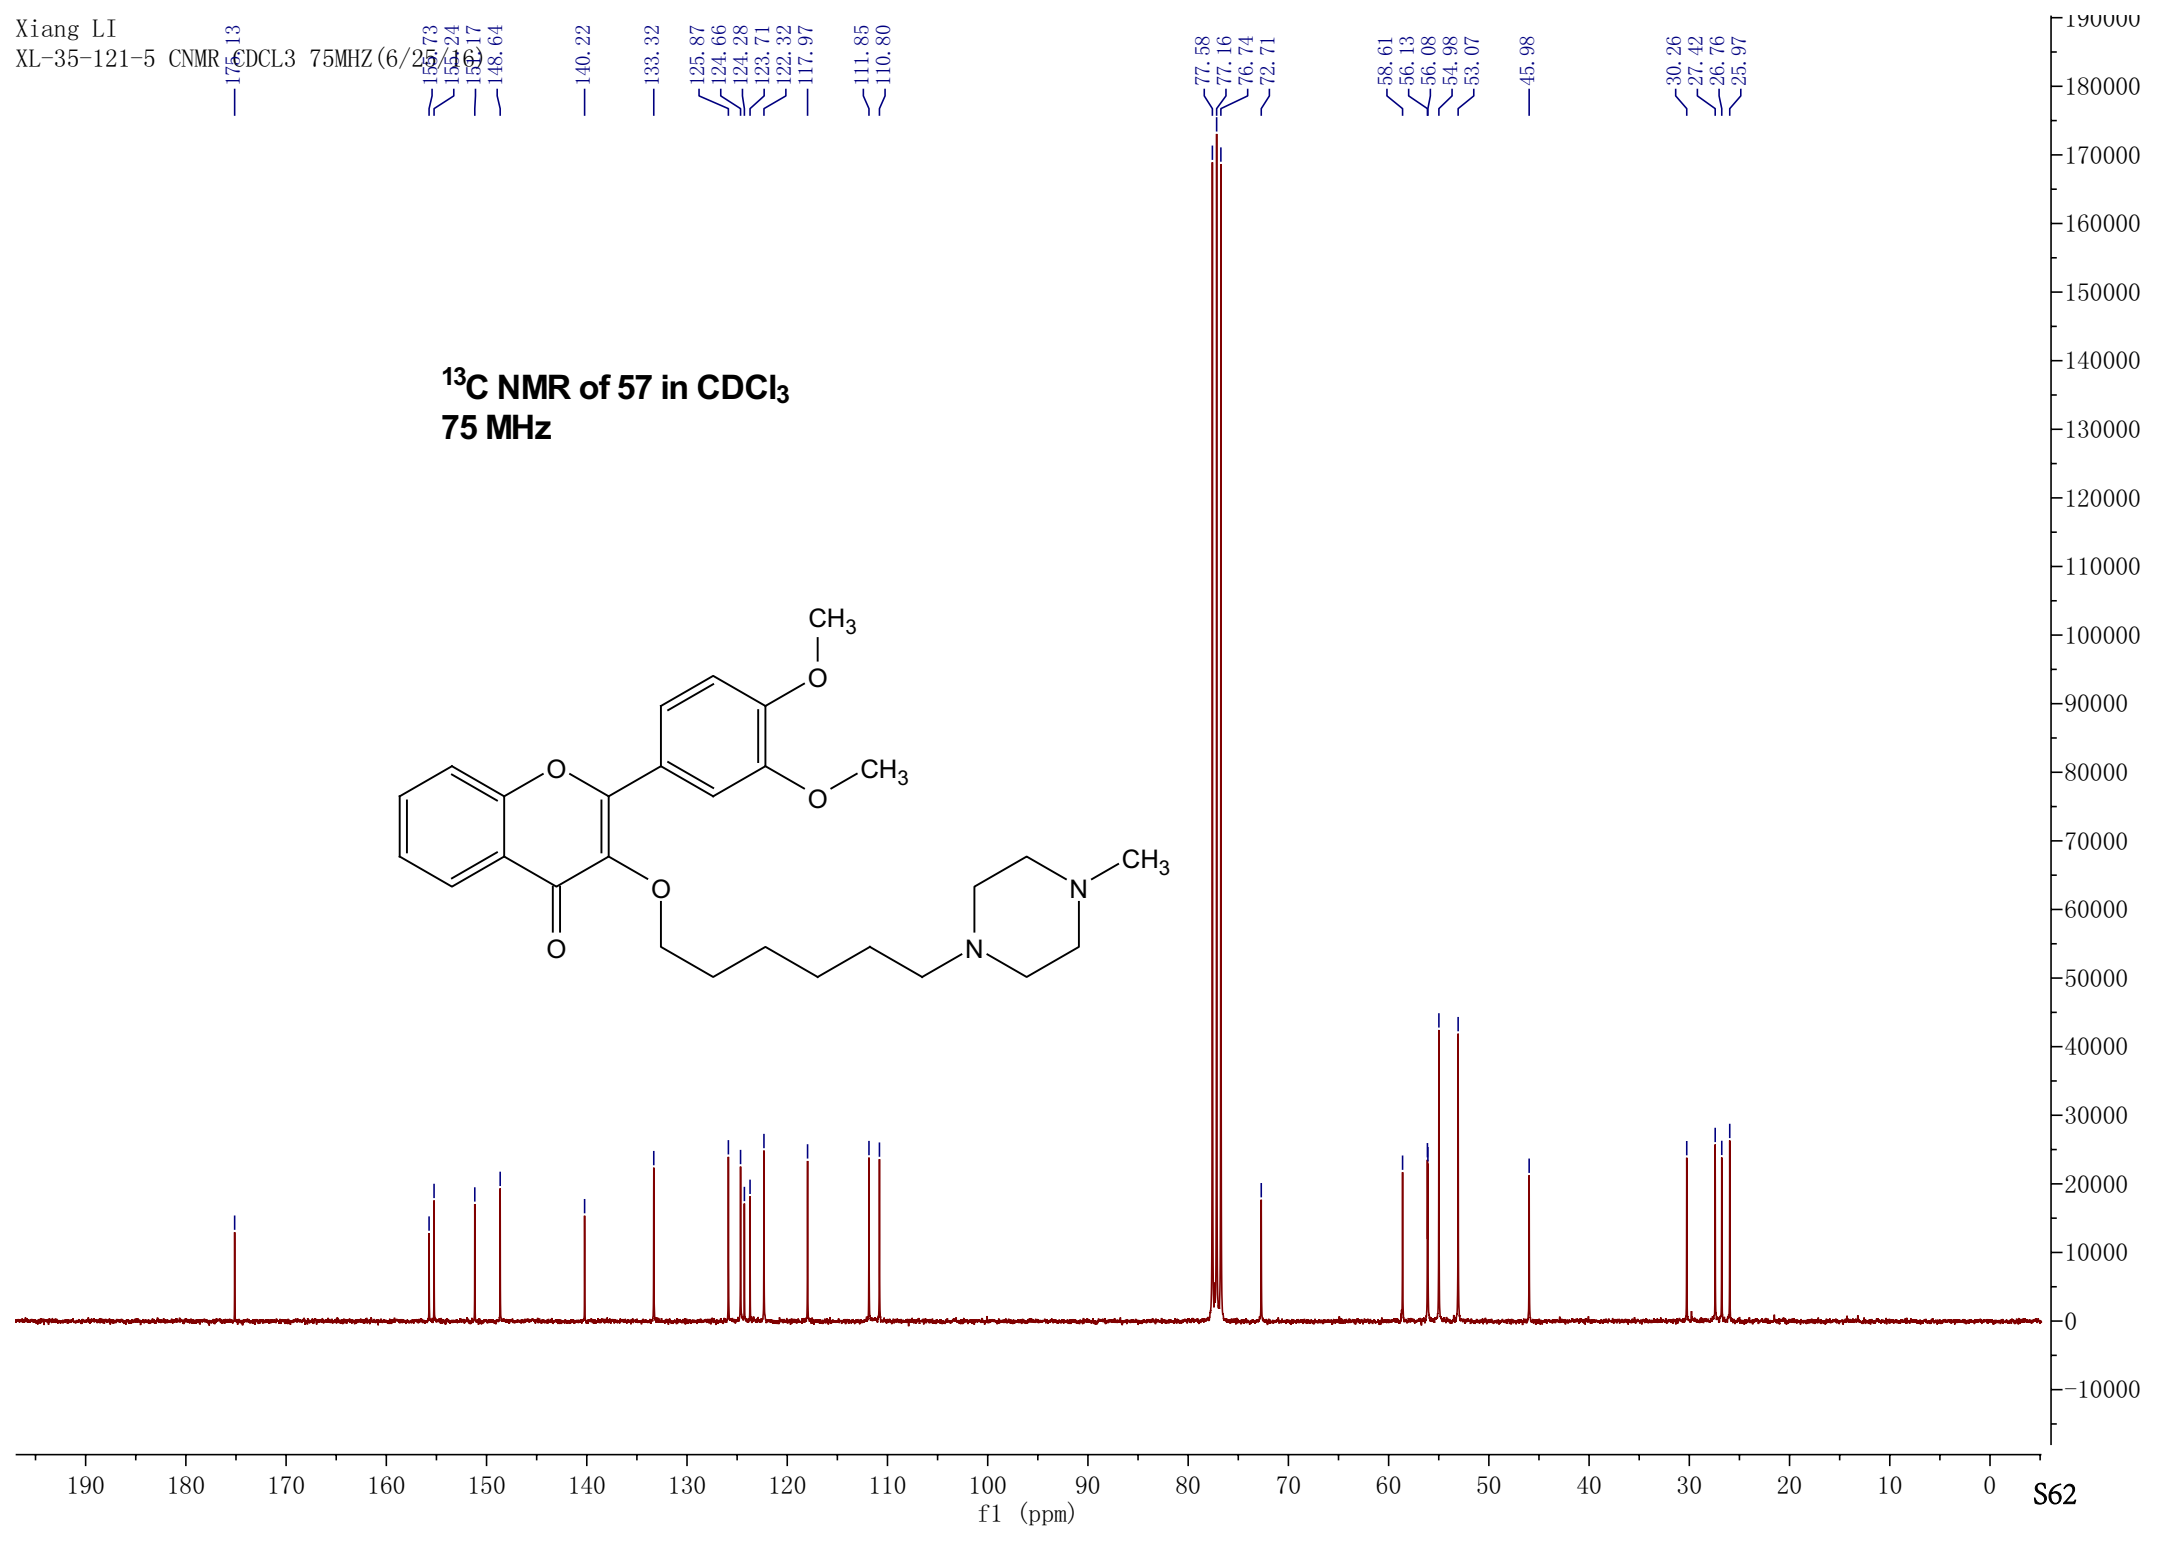

CDCl<sub>3</sub> 300MHz (7/17/16)  
7.25  
7.22  
7.22  
7.15  
7.14  
7.13  
7.05  
7.03  
7.00  
6.98  
6.97

4.03  
4.01  
3.99  
3.96  
3.95

2.96

2.52  
2.36  
2.33  
2.33  
2.30  
1.76  
1.74  
1.71  
1.69  
1.67  
1.51  
1.49  
1.46  
1.44  
1.42  
1.37  
1.36  
1.34  
1.32  
1.27  
1.26  
1.24

**<sup>1</sup>H NMR of 58 in CDCl<sub>3</sub>  
300 MHz**

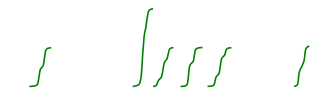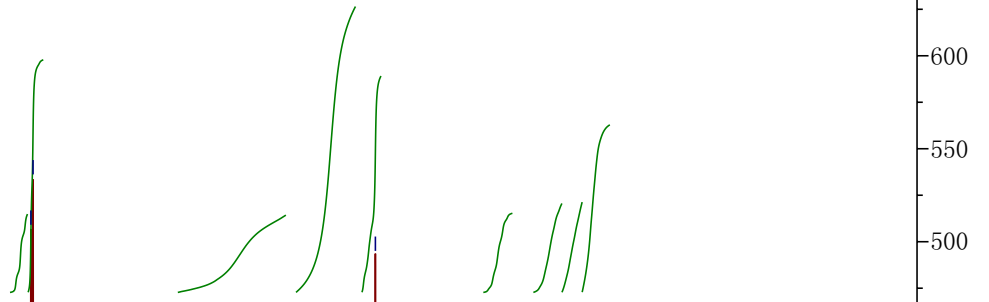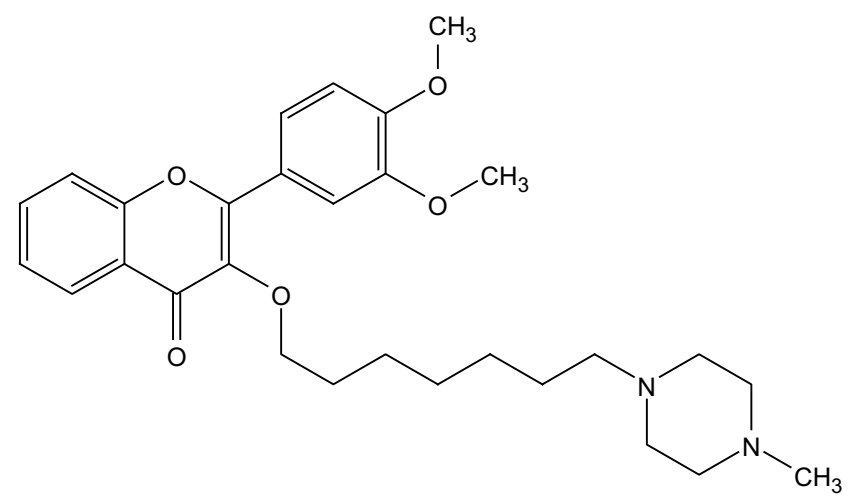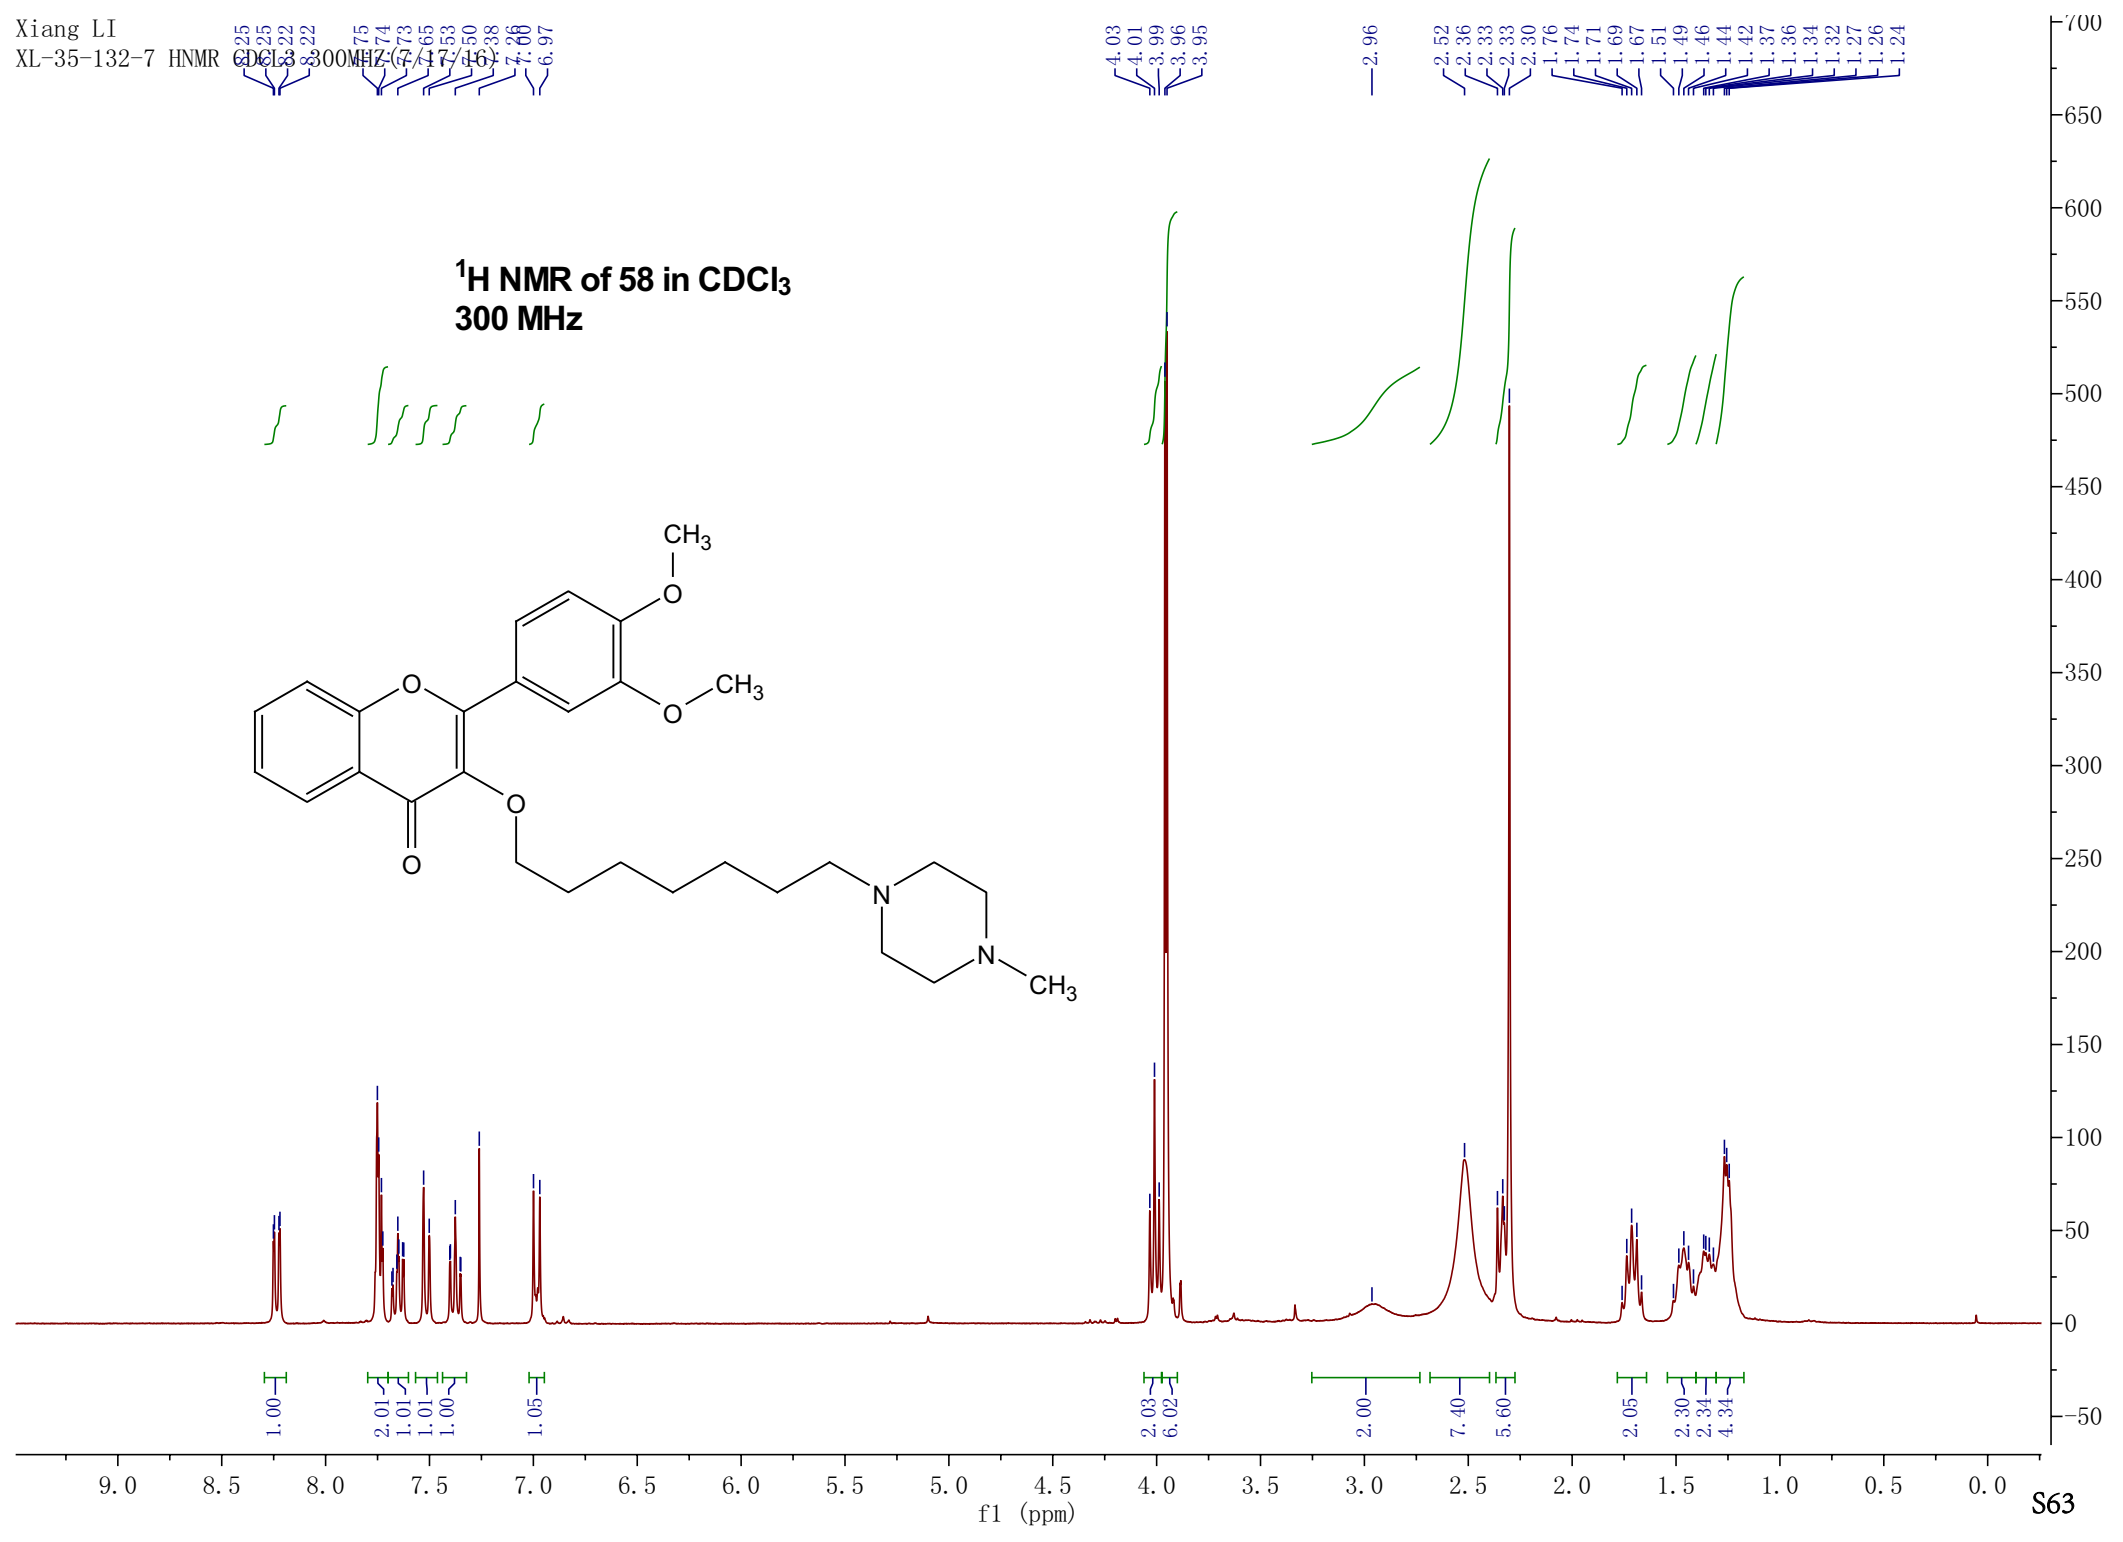

**<sup>13</sup>C NMR of 58 in CDCl<sub>3</sub>  
75 MHz**

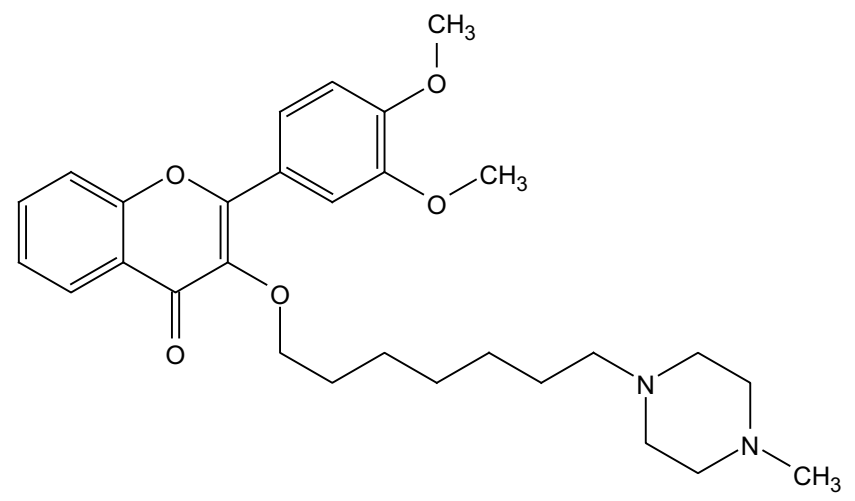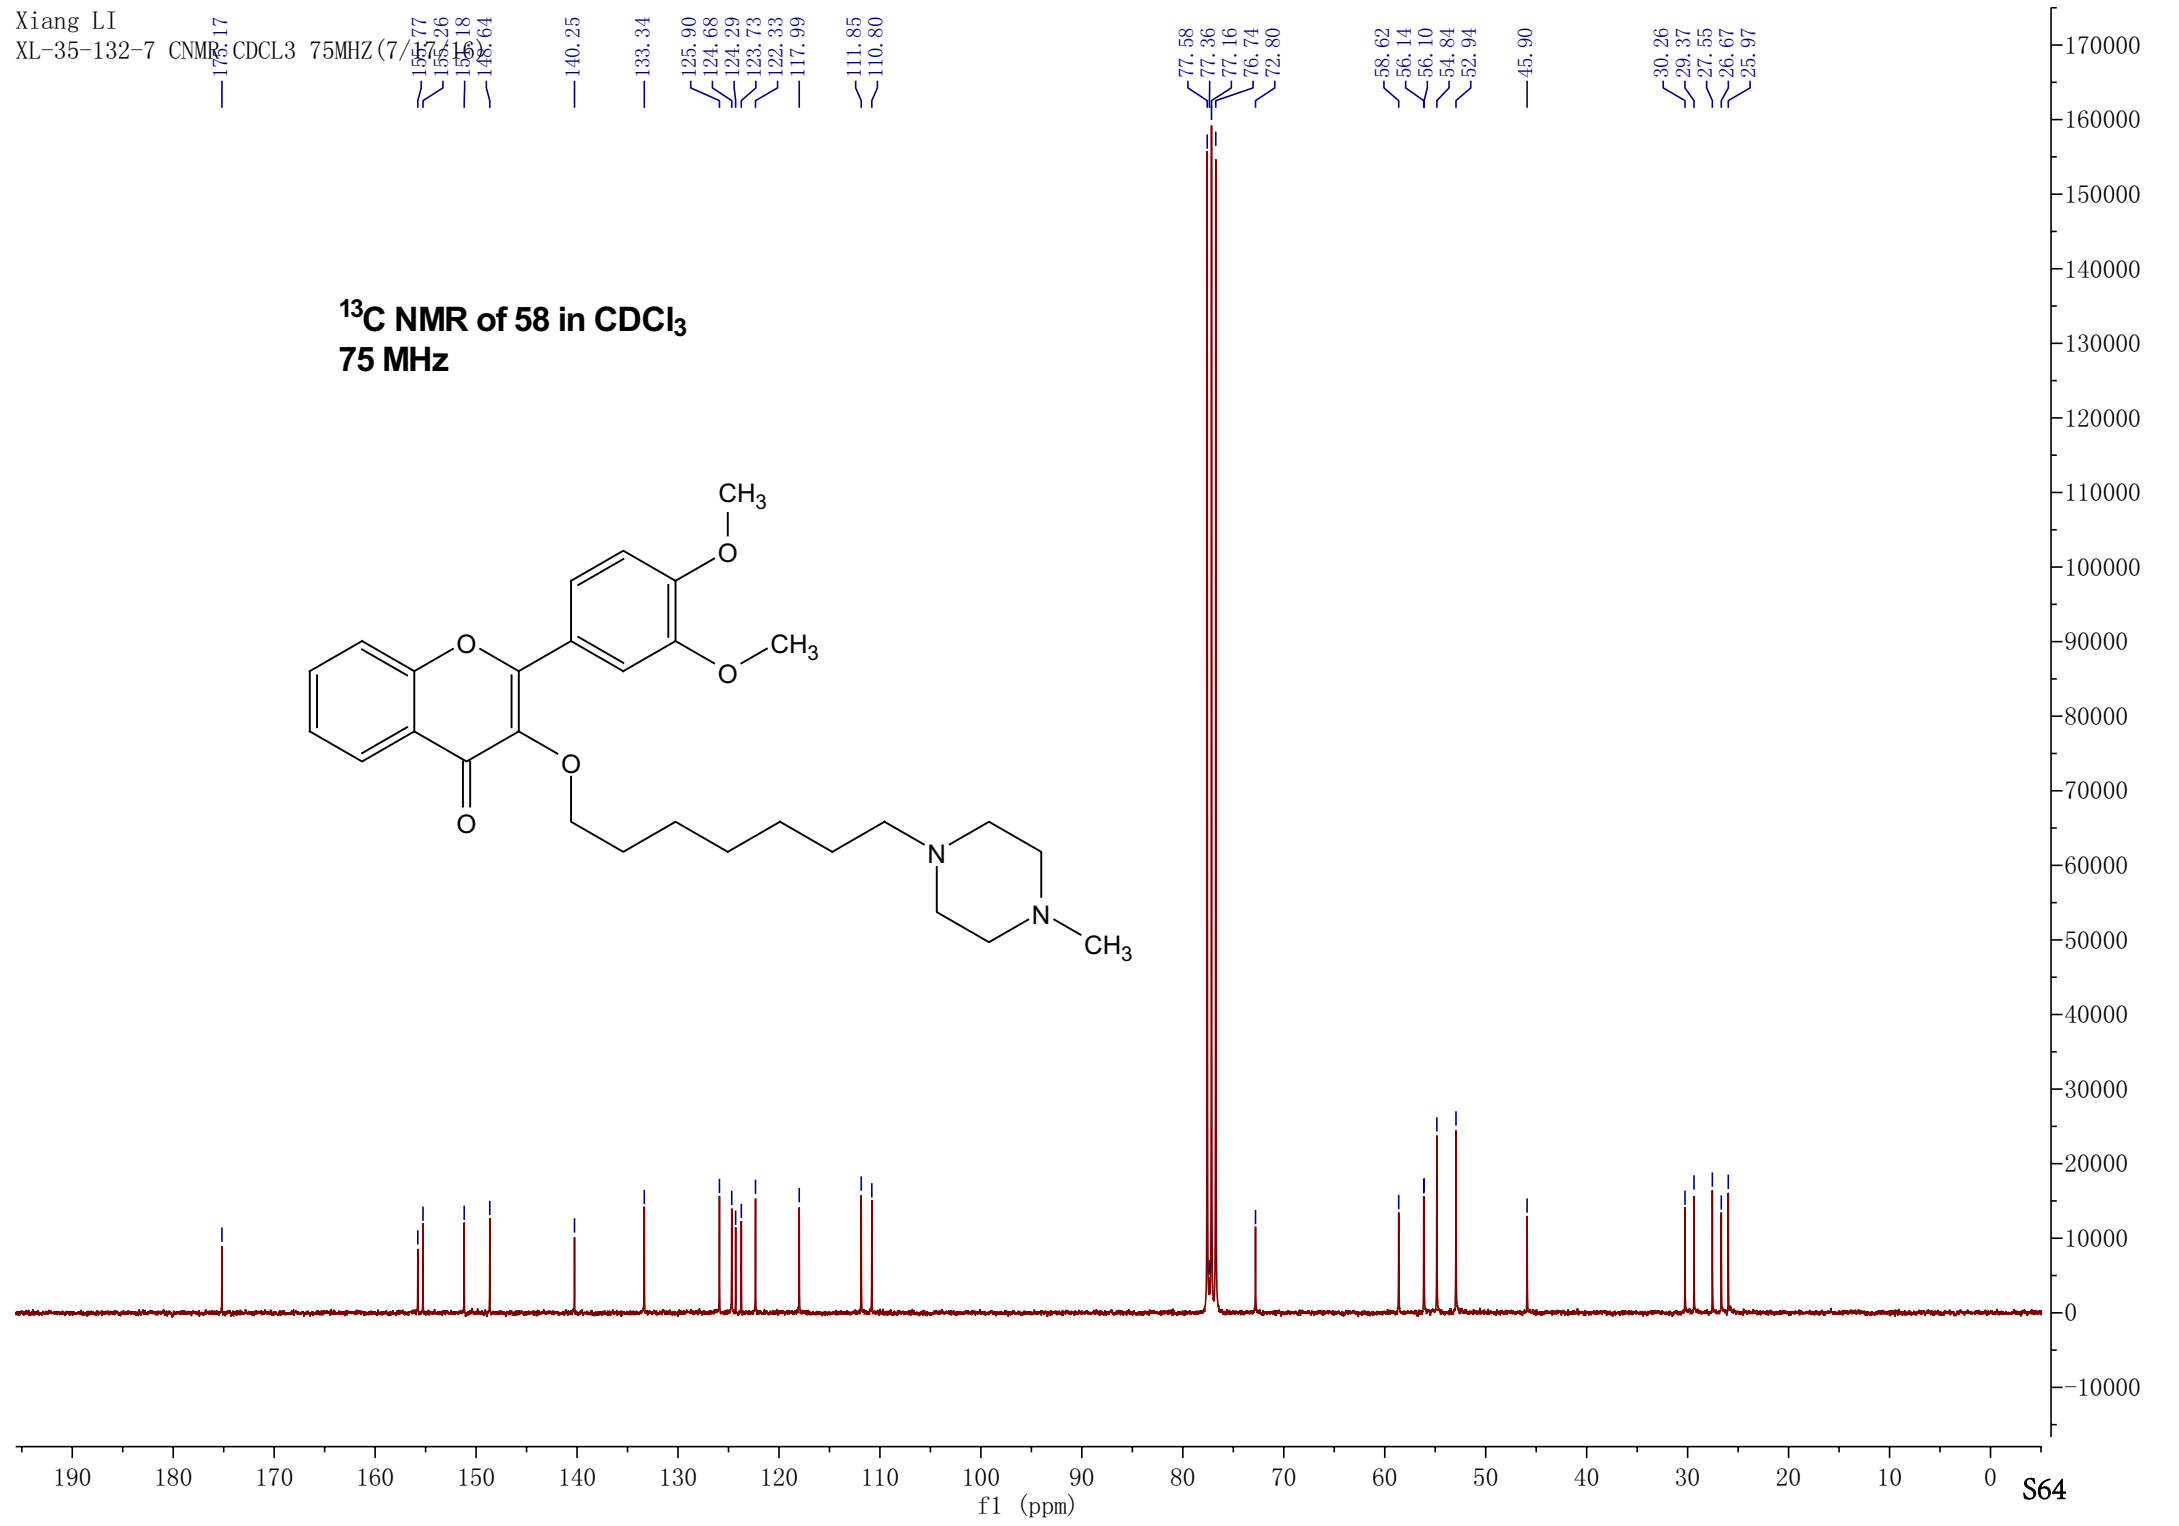

Xiang LI  
XL-35-104-4 HNMR CDCl<sub>3</sub> 300MHz (5/31/16)

**<sup>1</sup>H NMR of 59 in CDCl<sub>3</sub>  
300 MHz**

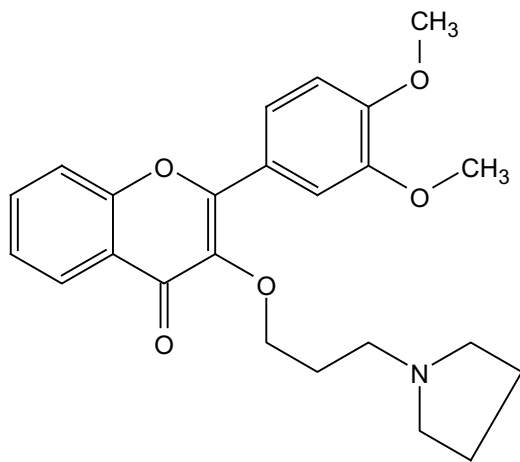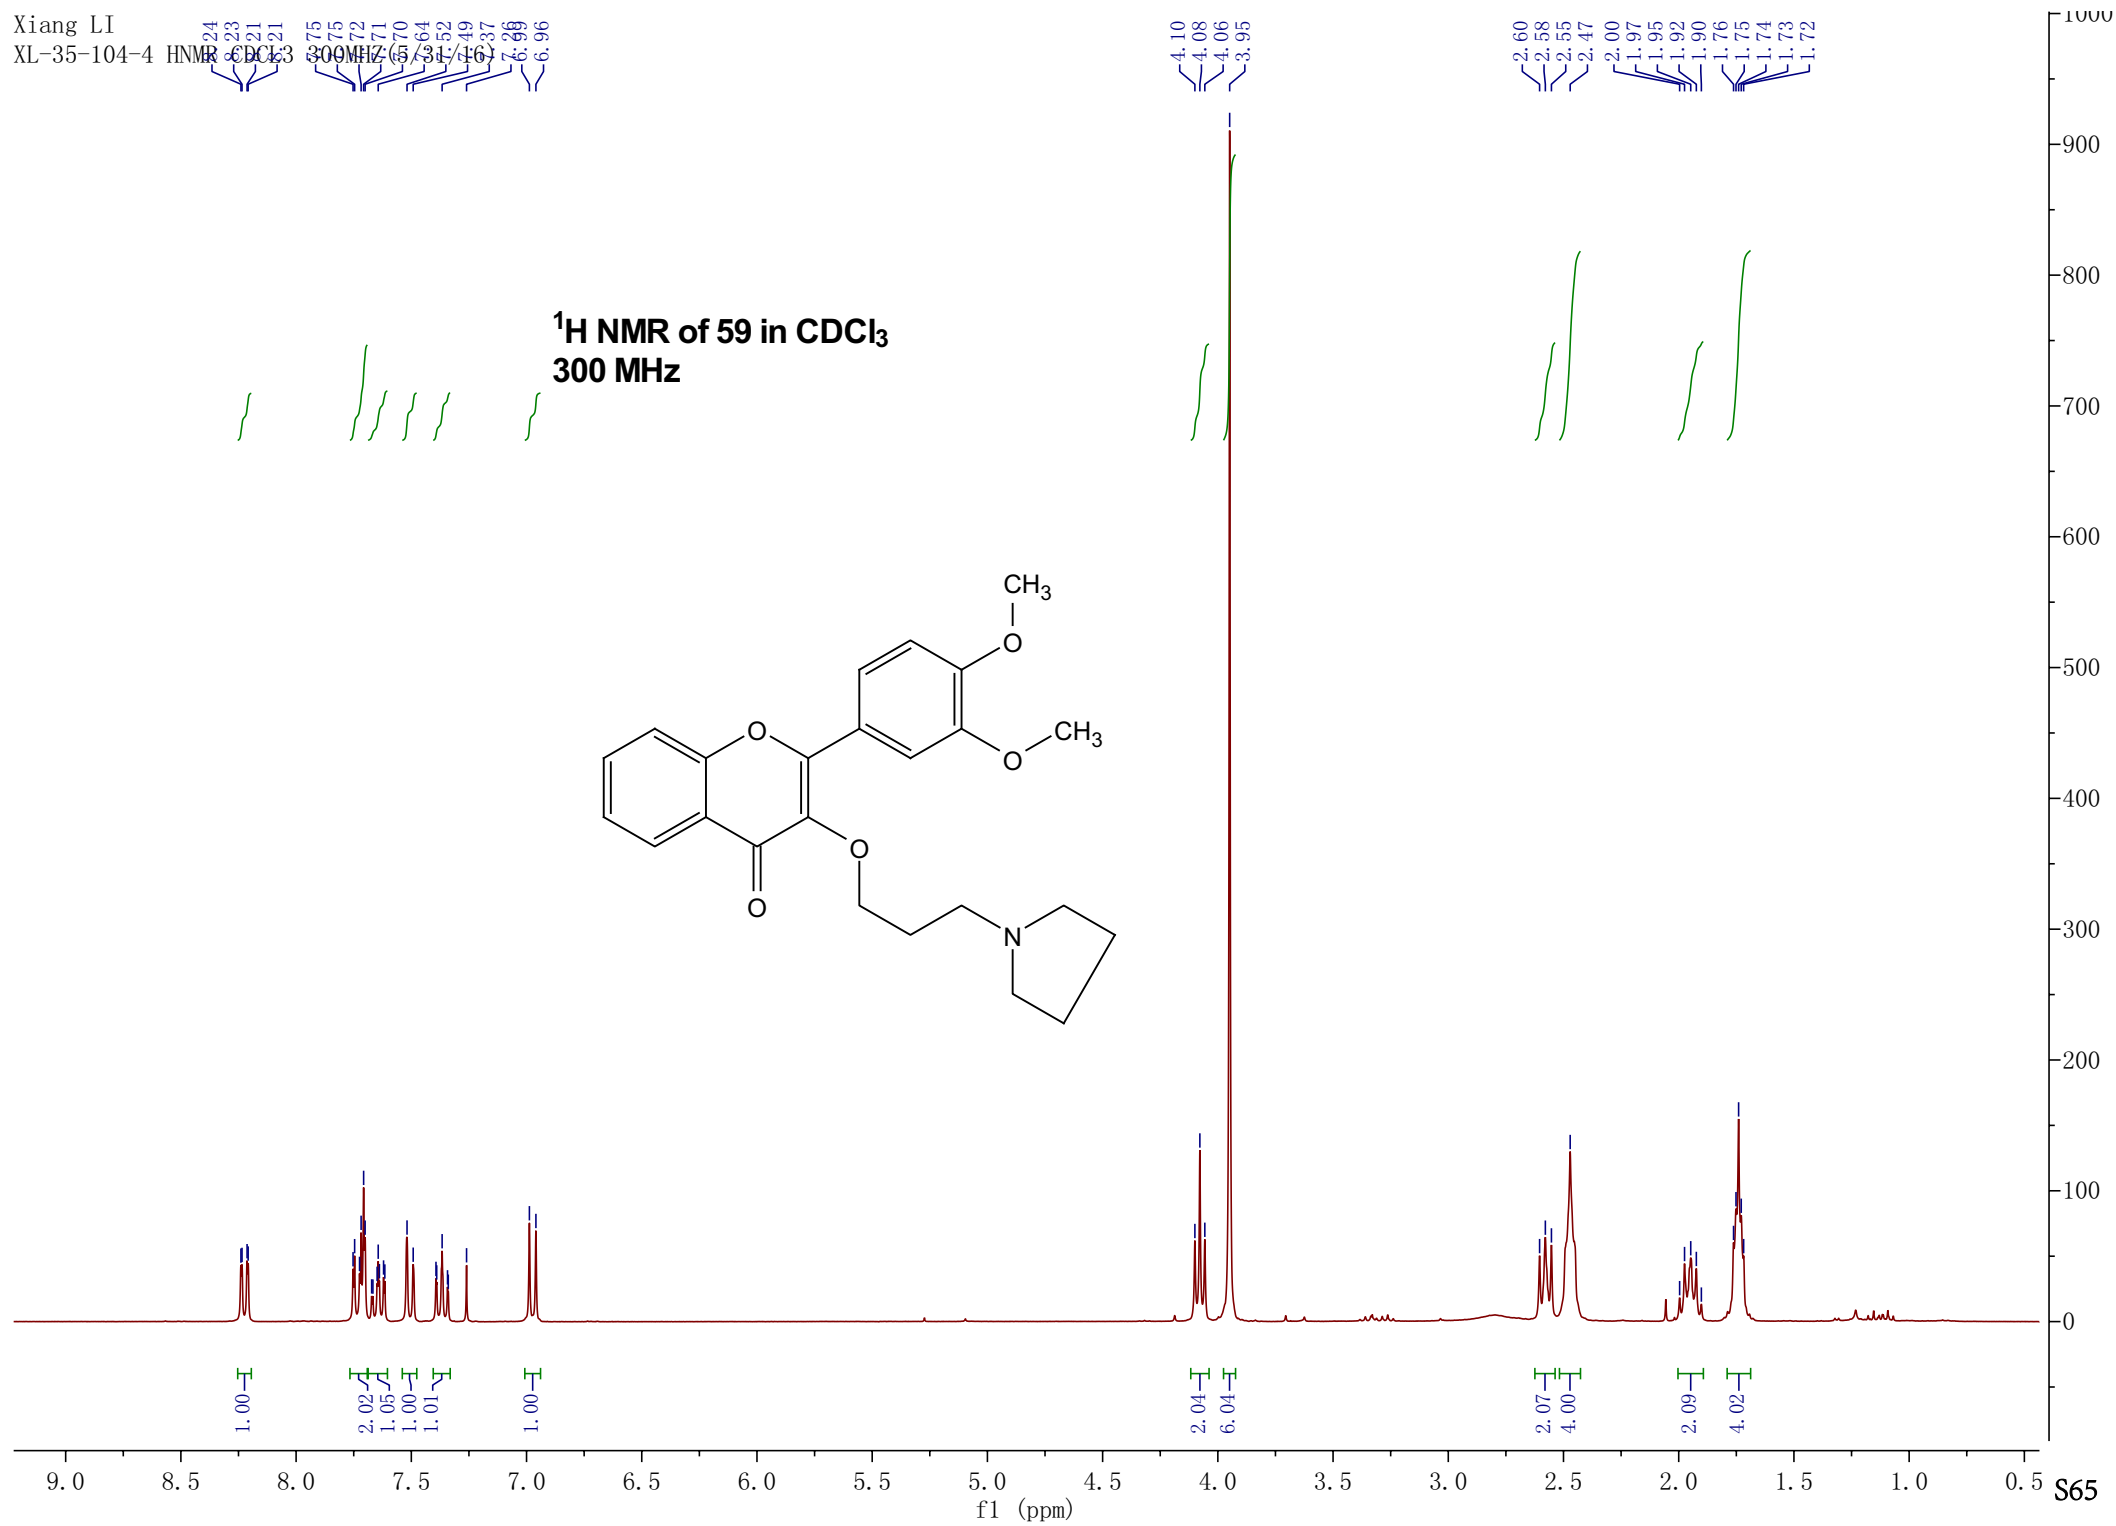

Xiang LI  
XL-35-104-4 CNMR

CDCL3 75MHZ (5)

**<sup>13</sup>C NMR of 59 in CDCl<sub>3</sub>  
75 MHz**

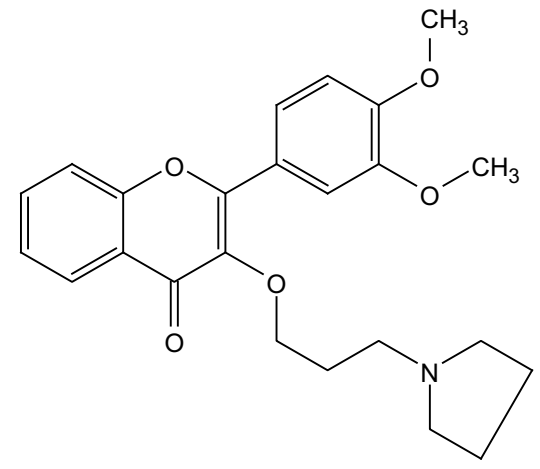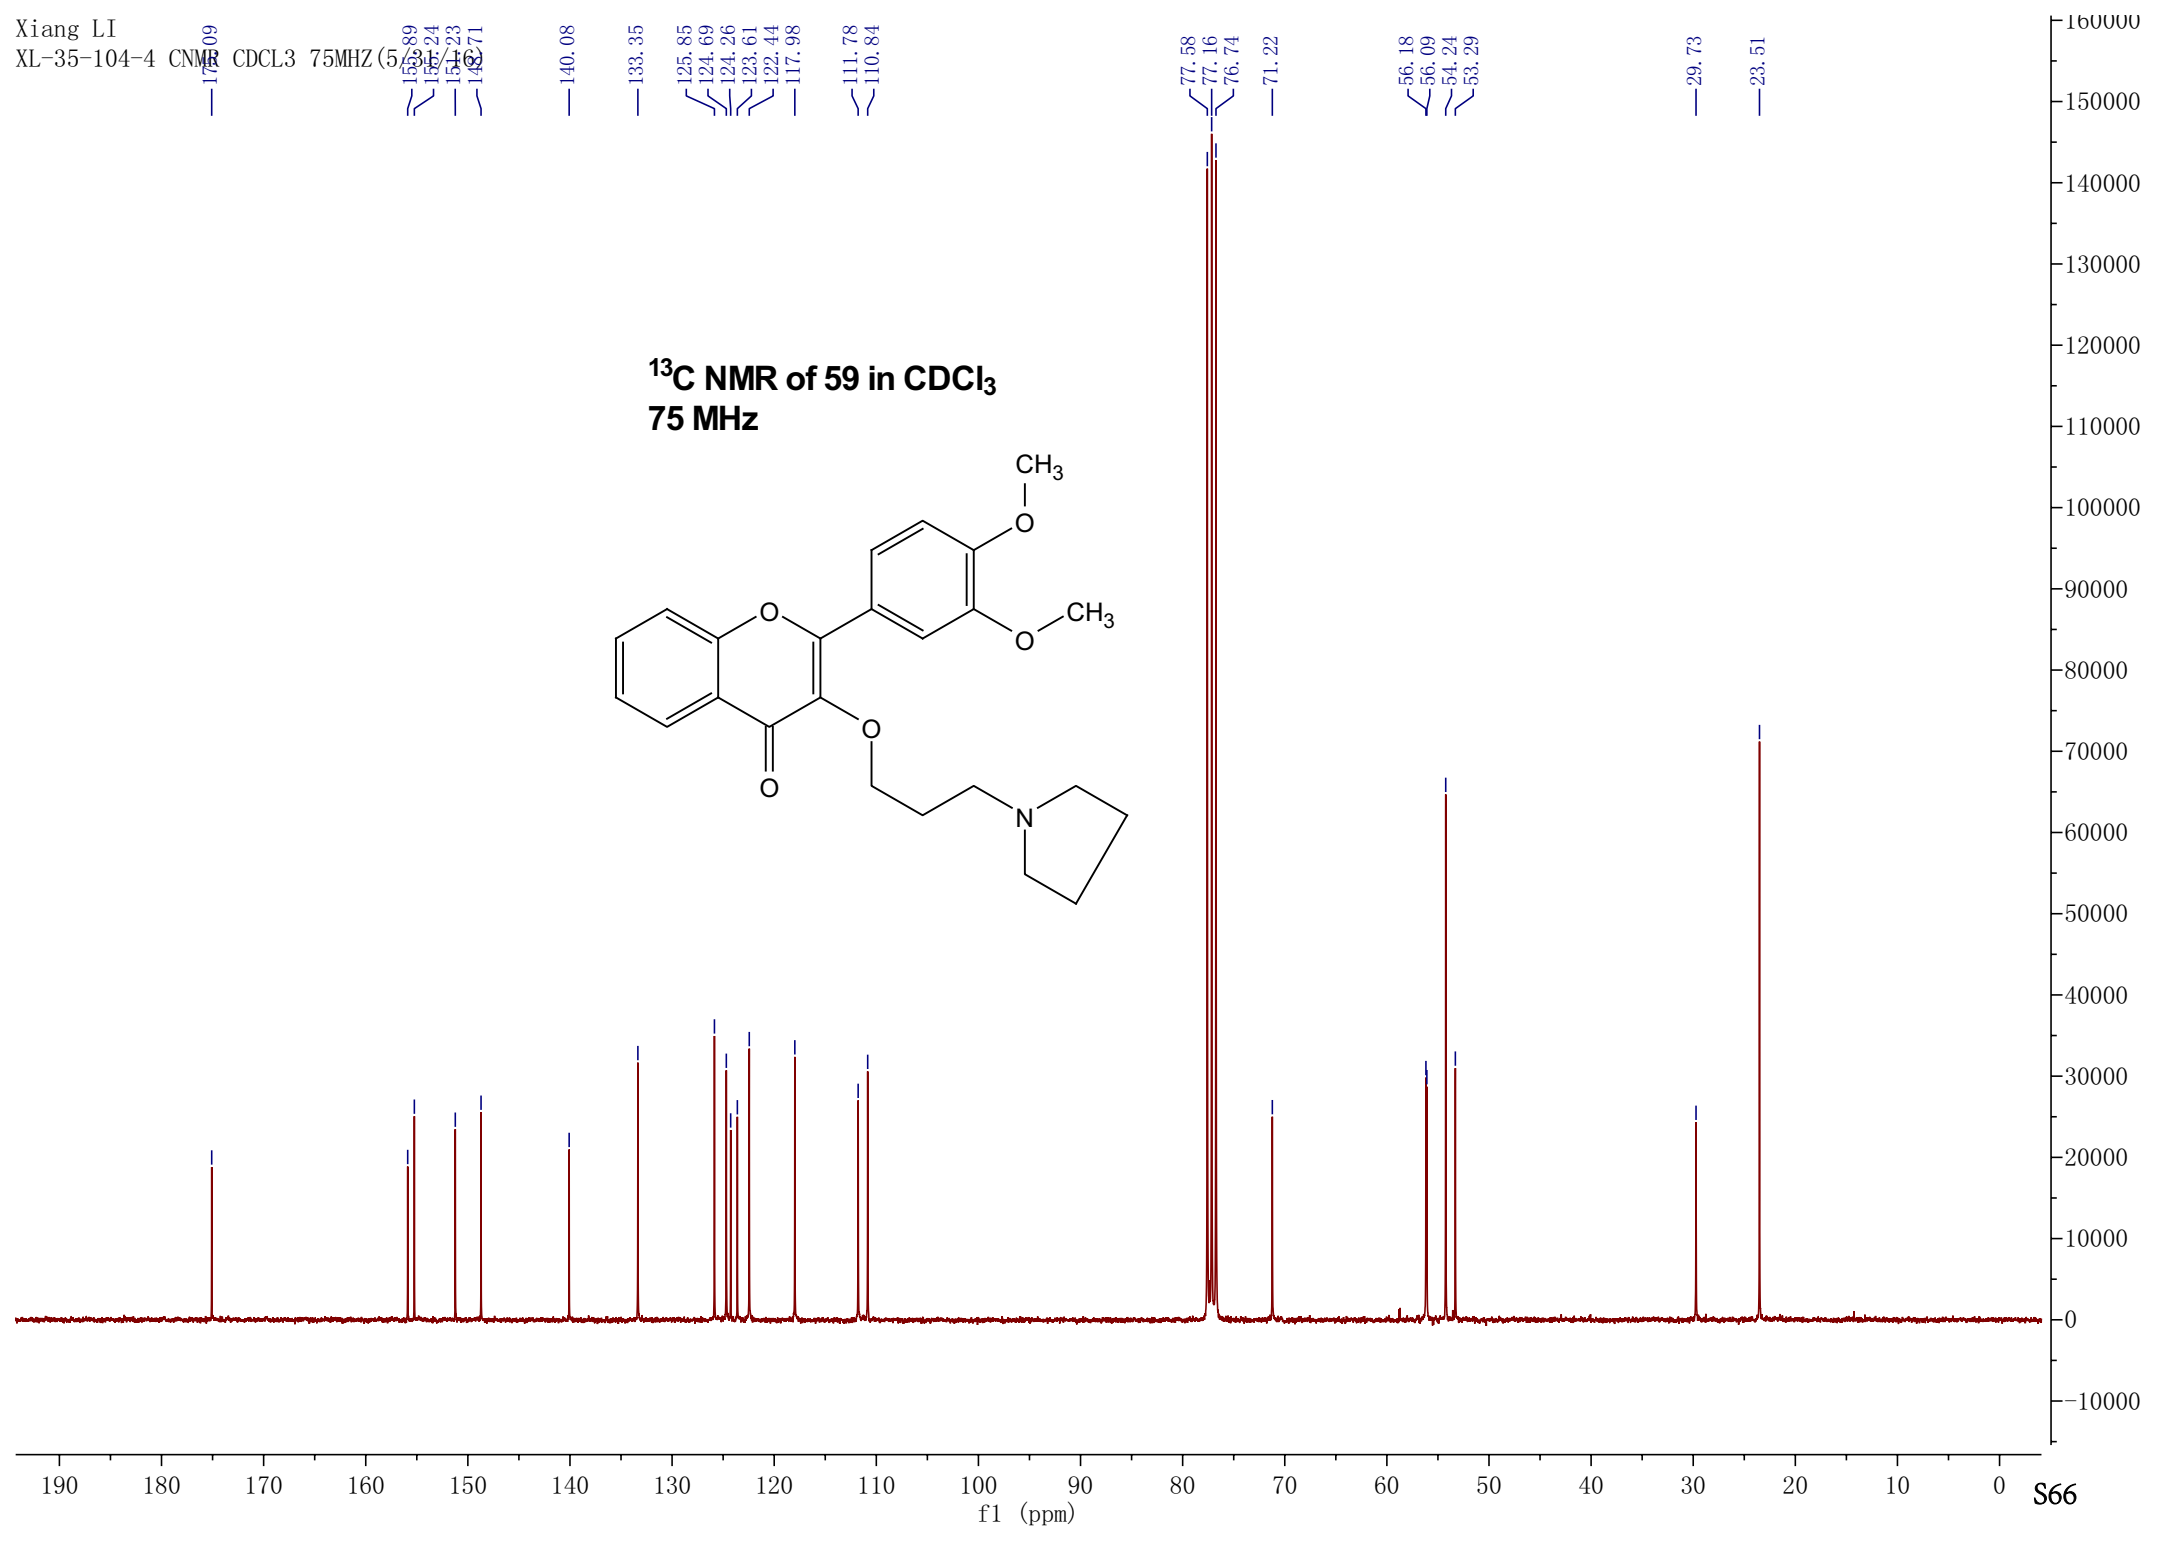

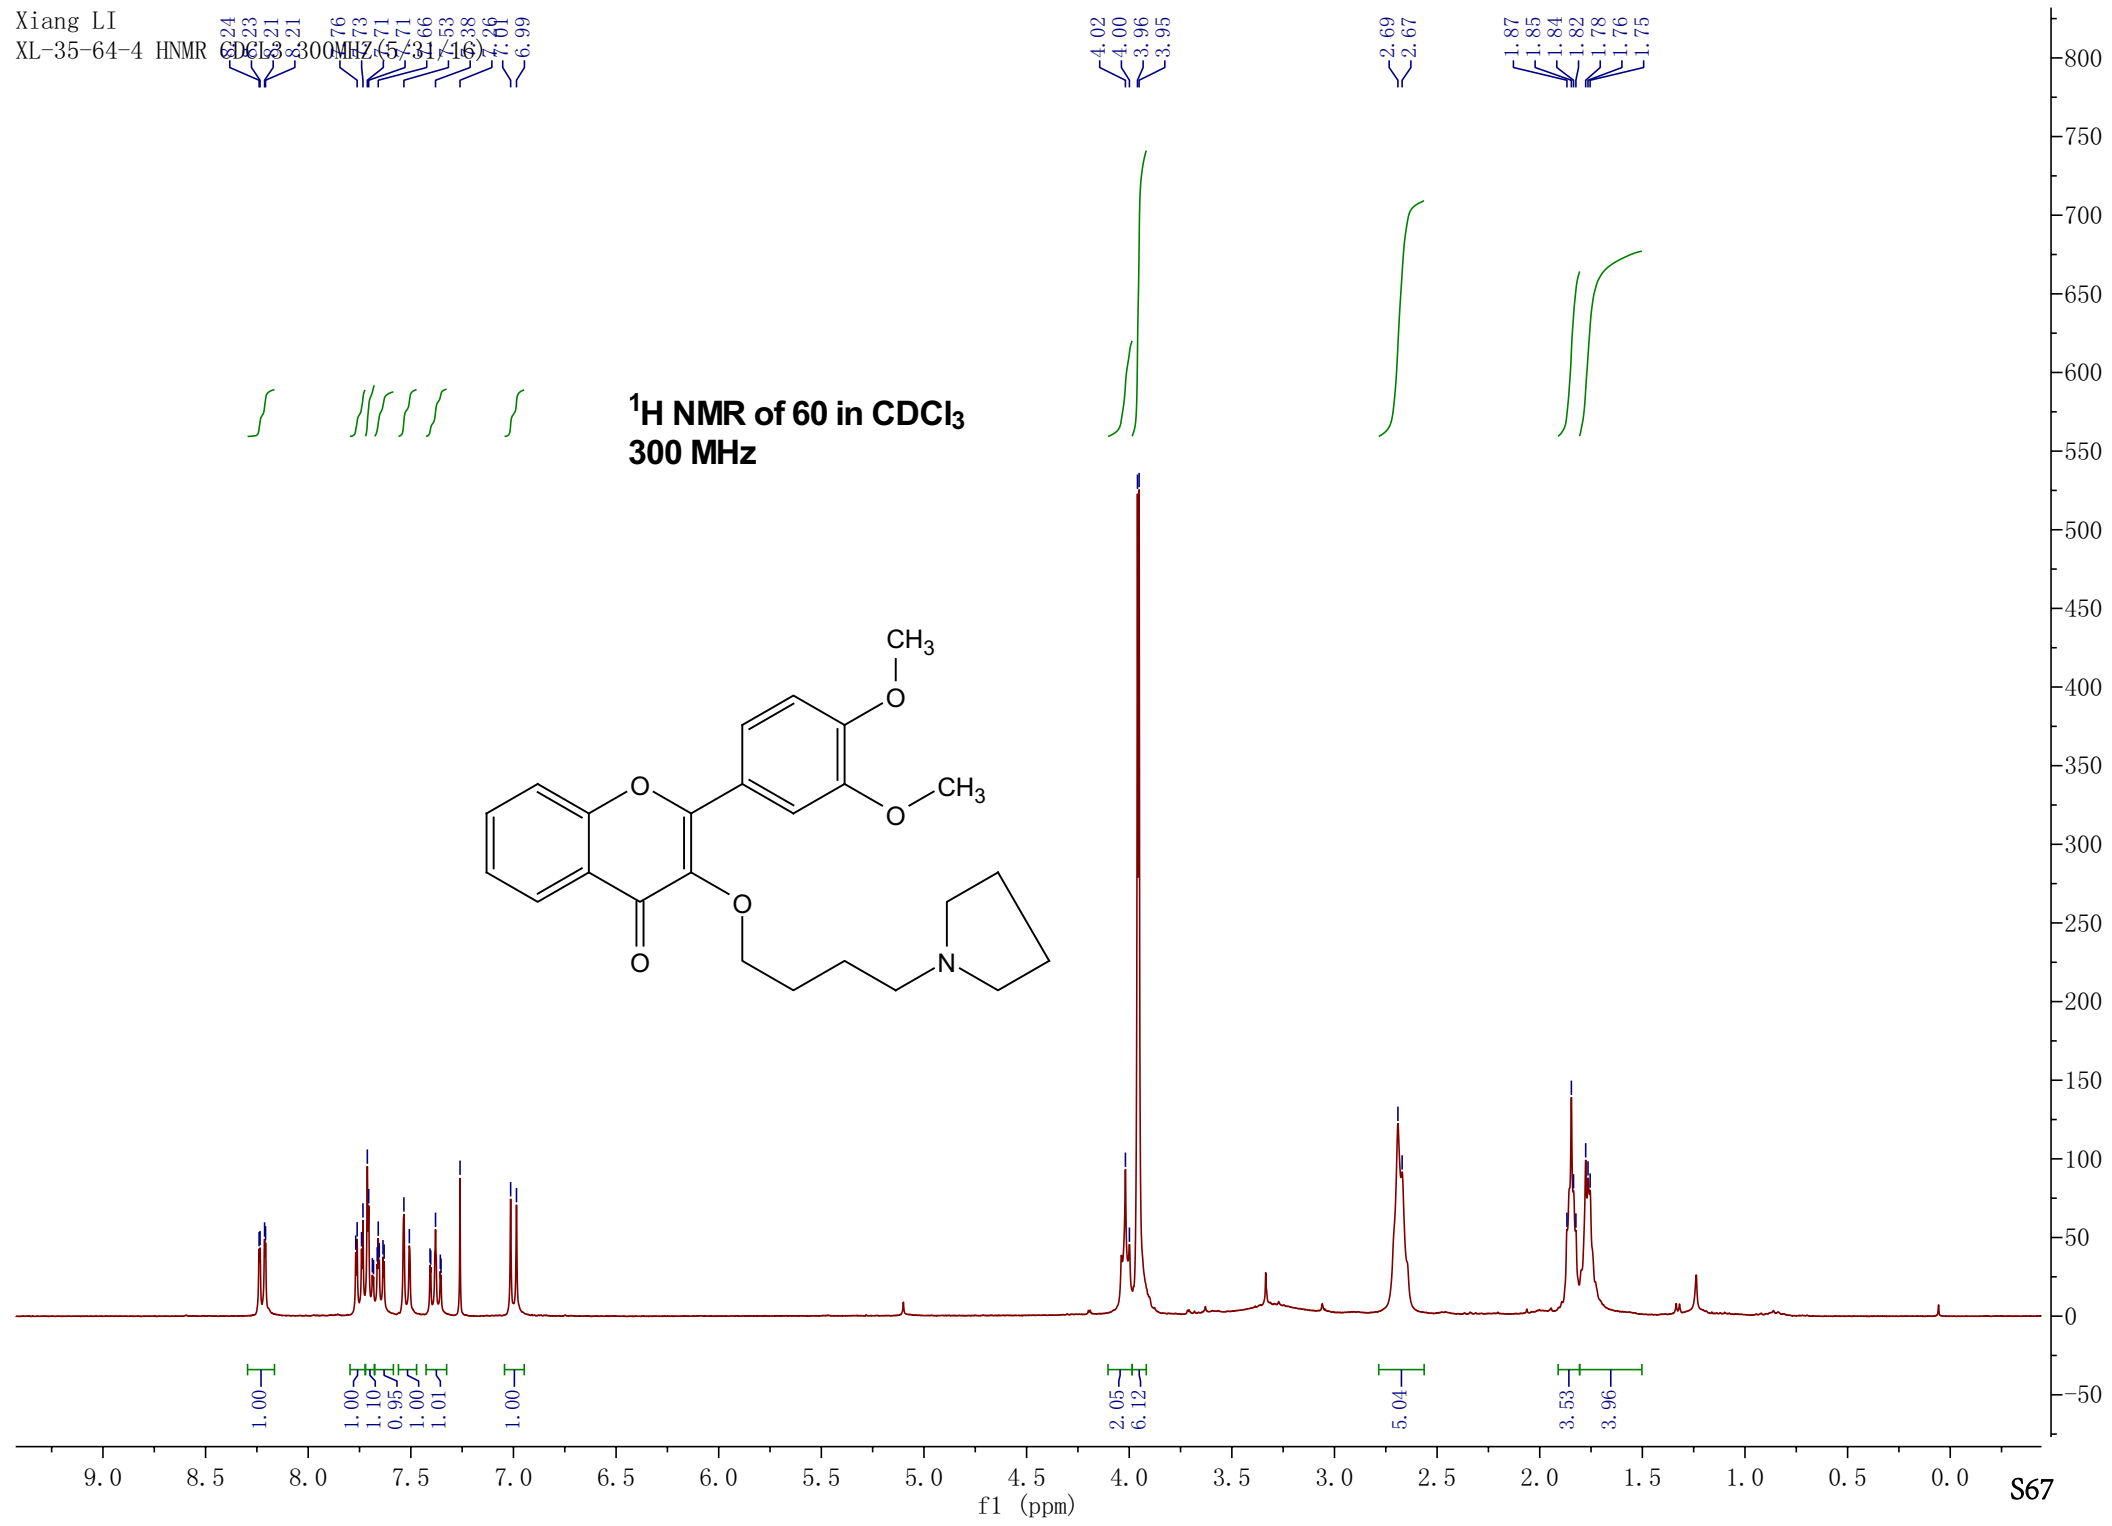

Xiang LI

XL-35-64-4 CNMR CDCL3 75MHZ (5/30/16)

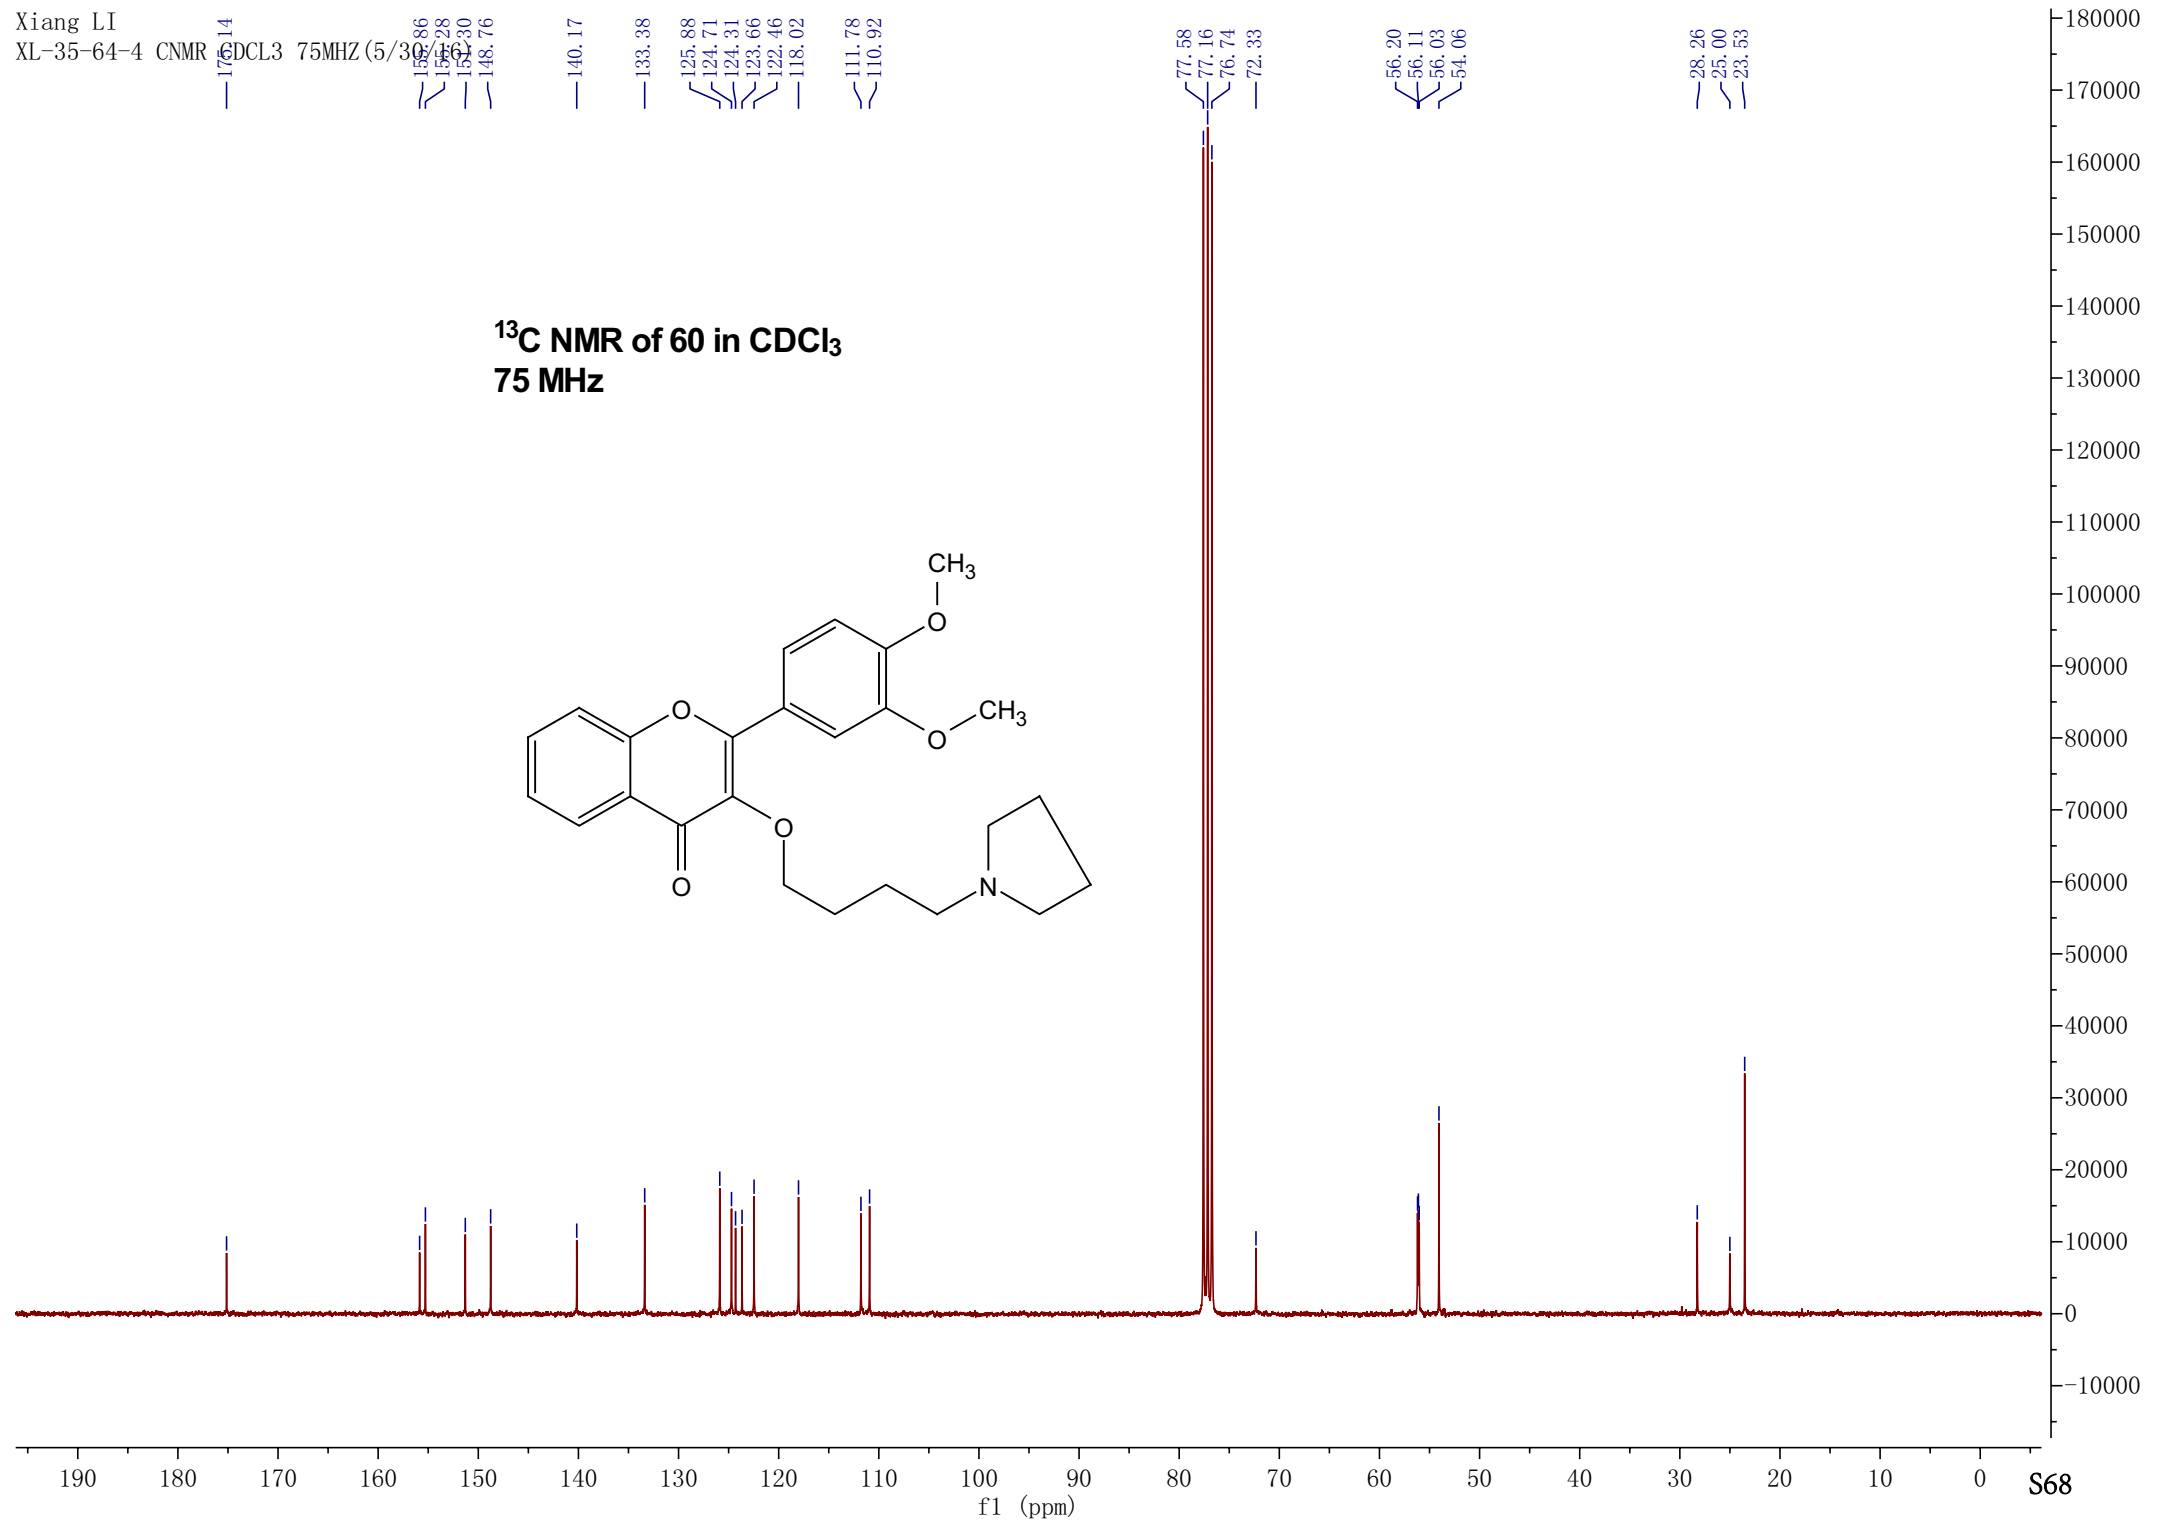



Xiang LI  
XL-35-106-4 HNMR CDCl<sub>3</sub> 300MHz (5/31/16)

7.20  
7.19  
7.17  
7.16  
7.70  
7.69  
7.68  
7.59  
7.47  
7.45  
7.39  
7.35  
6.93  
6.92

4.00  
3.98  
3.96  
3.91

2.42  
2.36  
2.34  
2.31  
1.75  
1.72  
1.70  
1.69  
1.68  
1.66  
1.49  
1.48  
1.46  
1.45  
1.44  
1.41  
1.40  
1.38  
1.36  
1.34  
1.33

**<sup>1</sup>H NMR of 61 in CDCl<sub>3</sub>  
300 MHz**

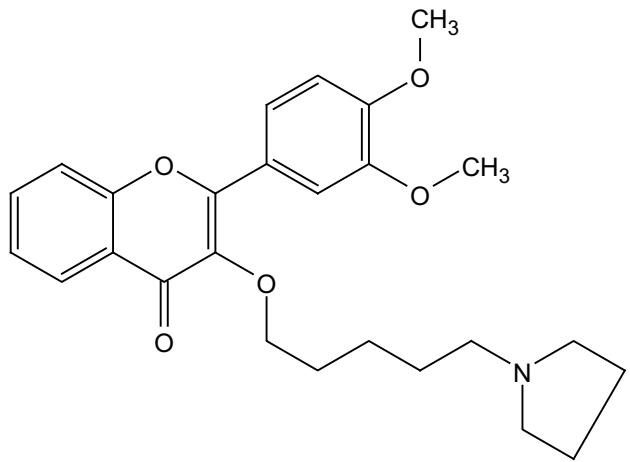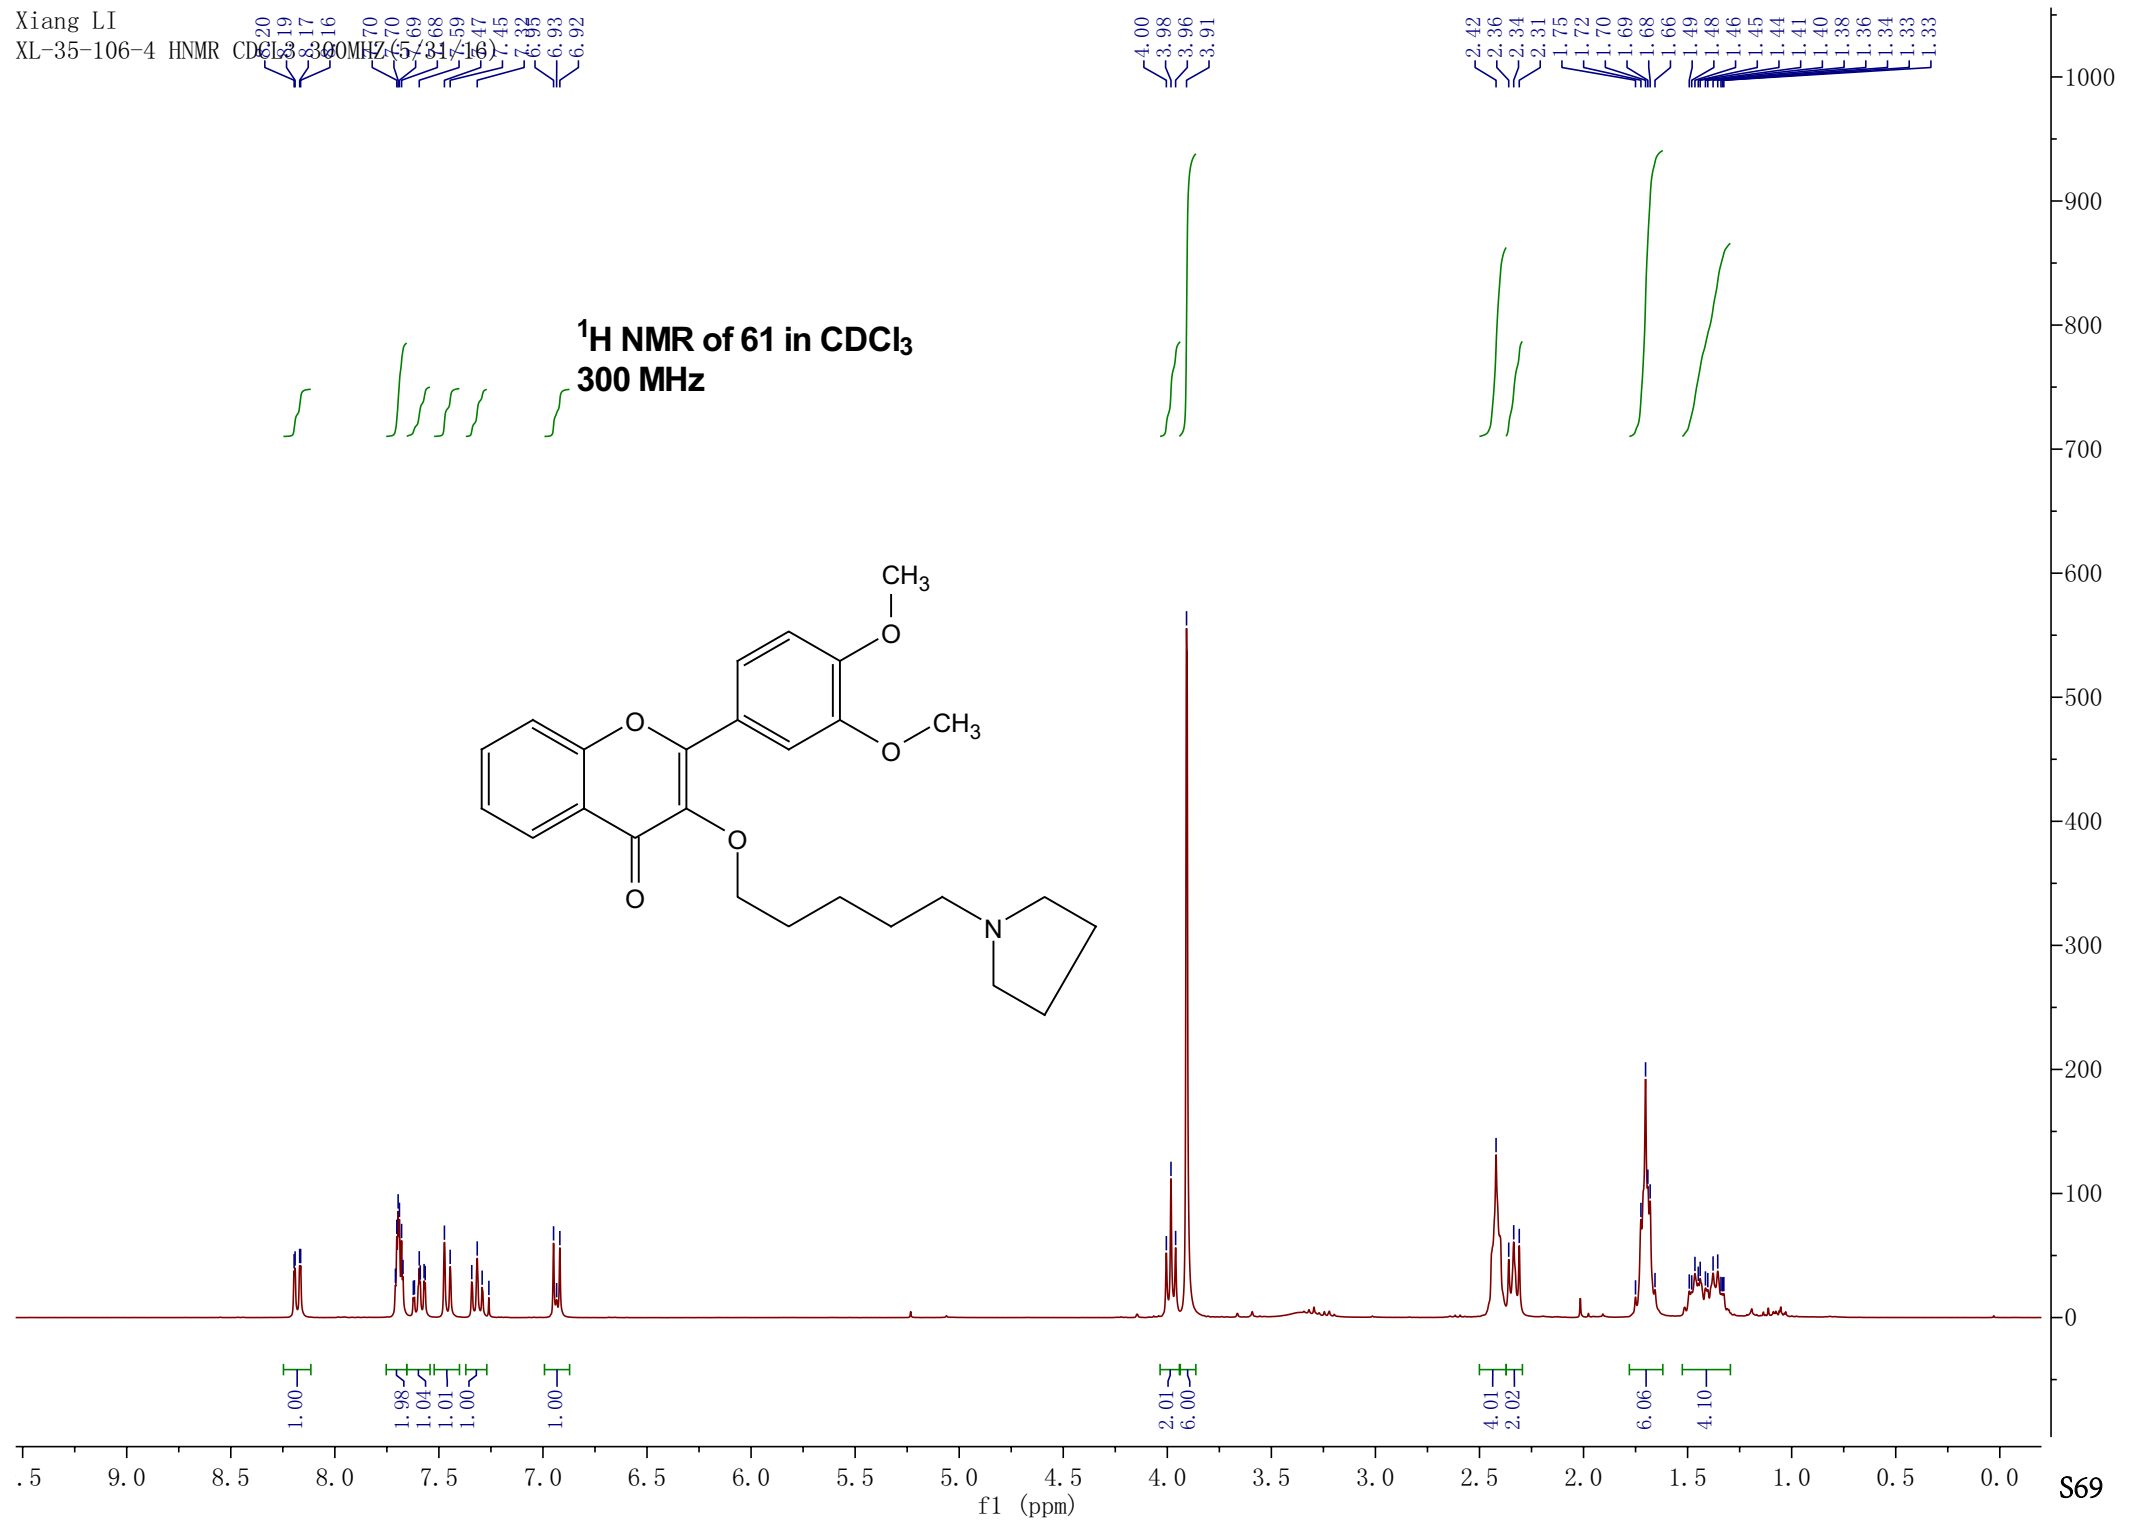

Xiang LI  
XL-35-106-4 CNMR CDCL3 75MHZ (5/

**<sup>13</sup>C NMR of 61 in CDCl<sub>3</sub>  
75 MHz**

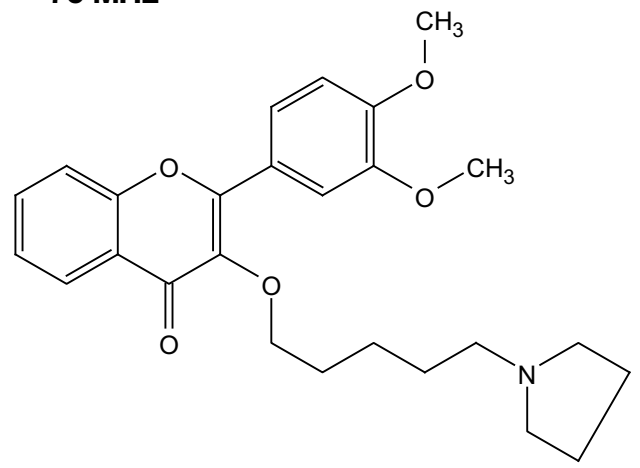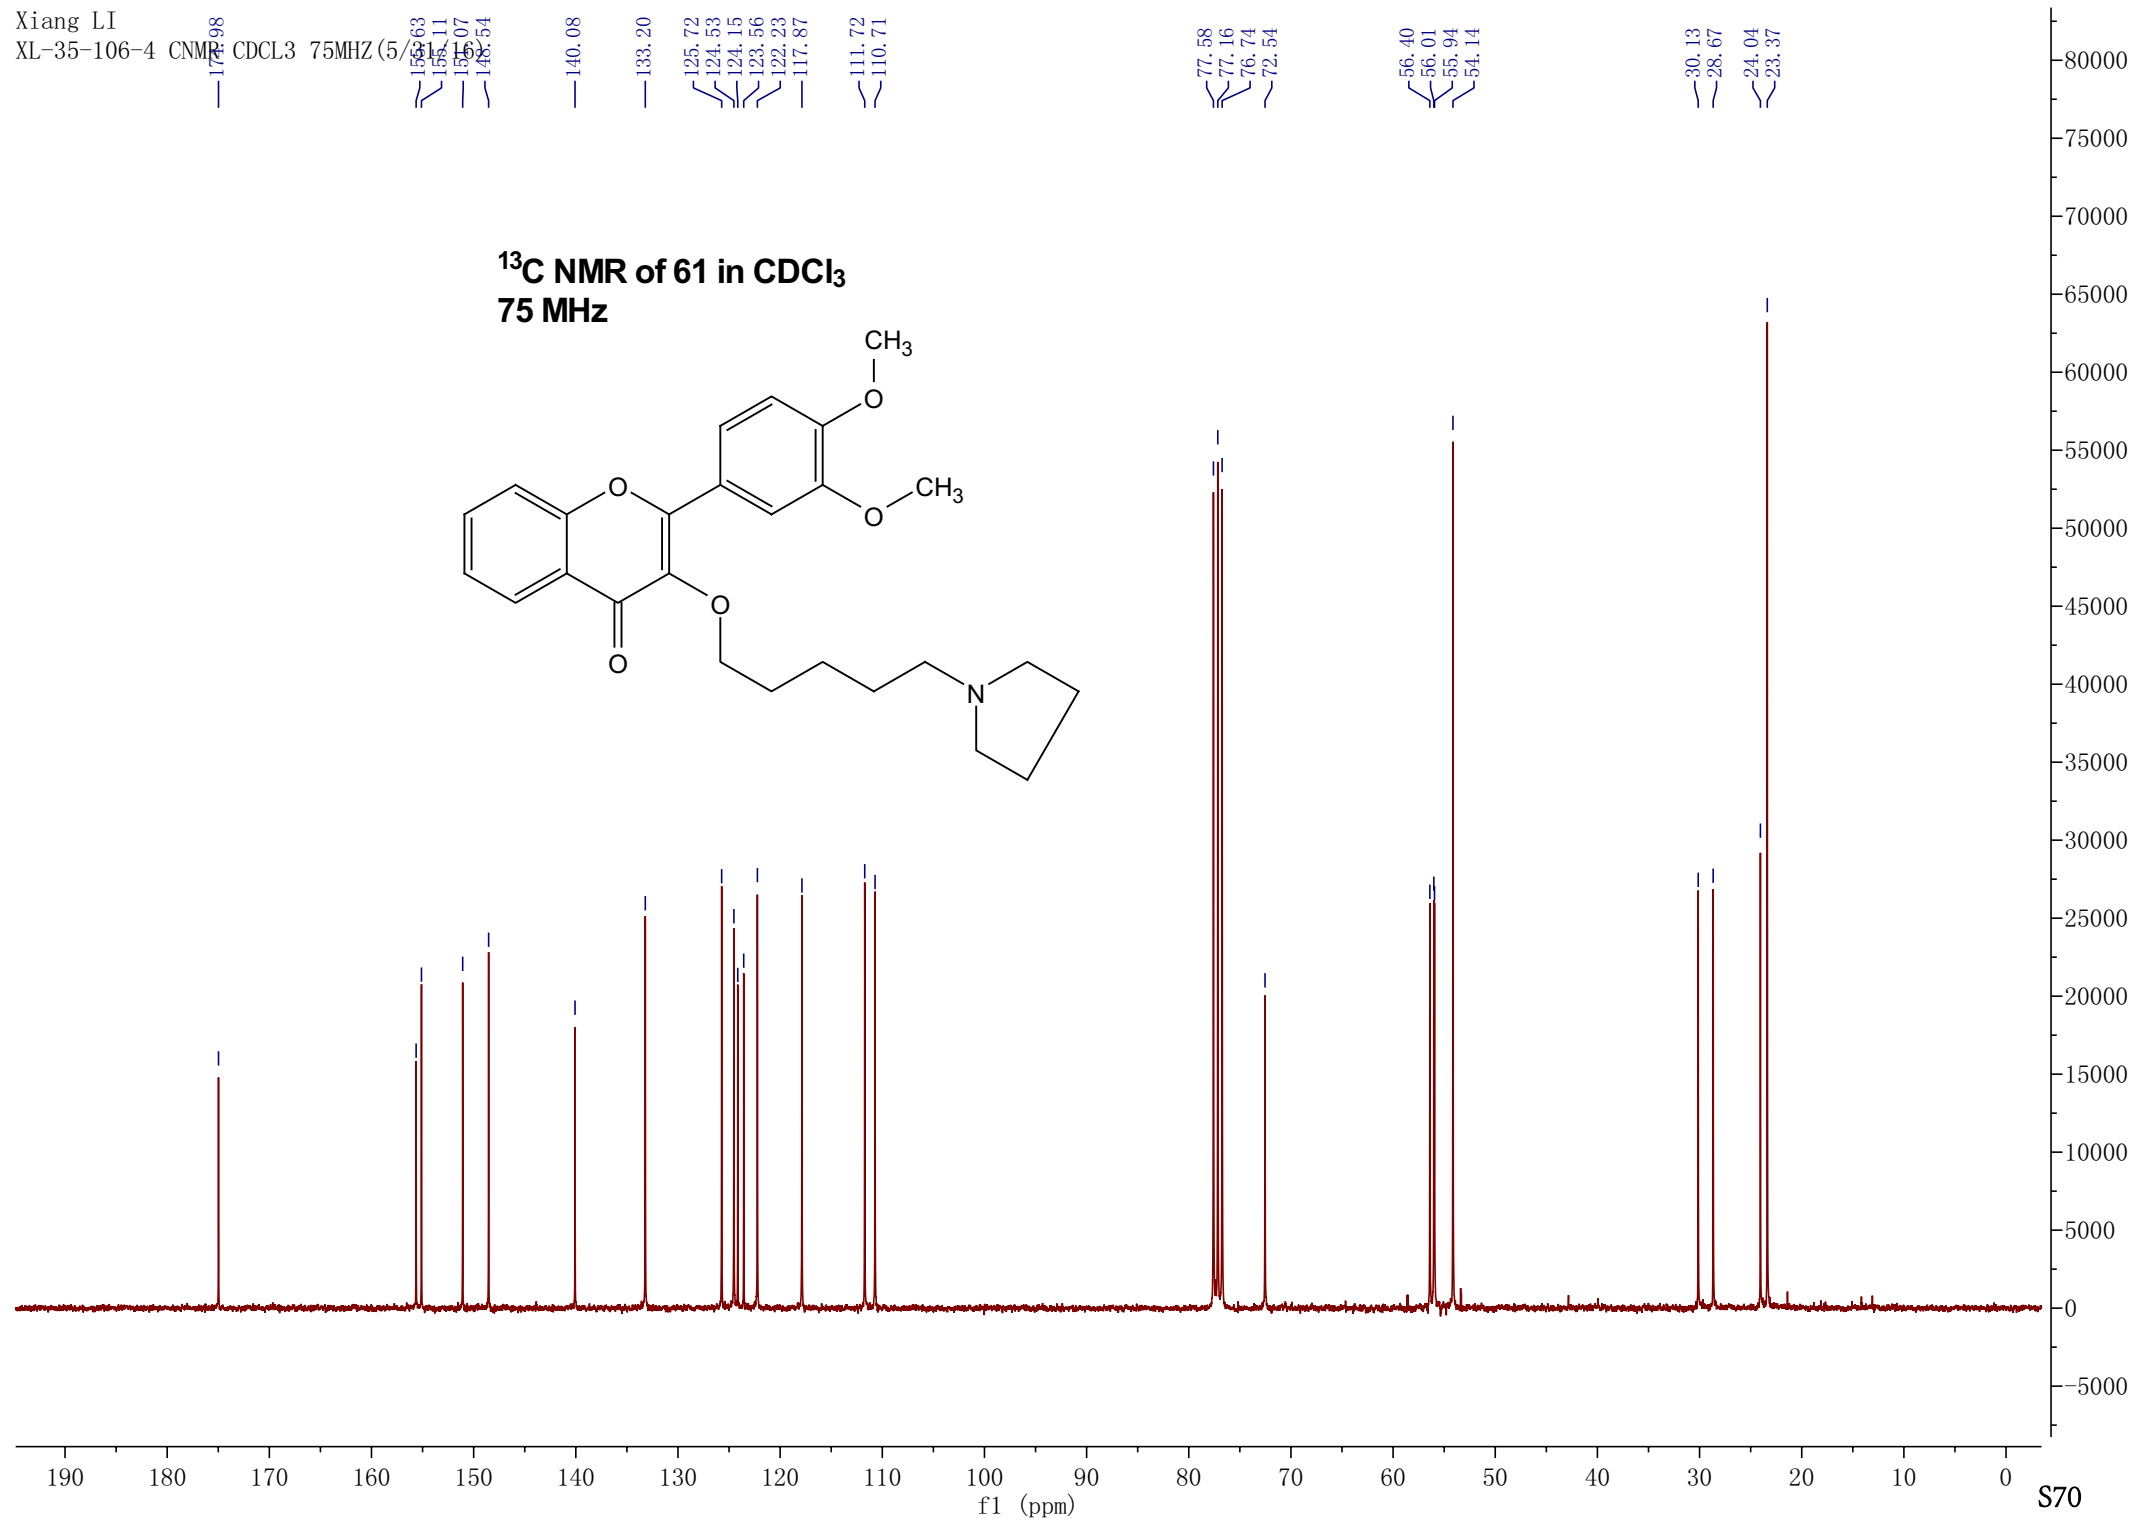

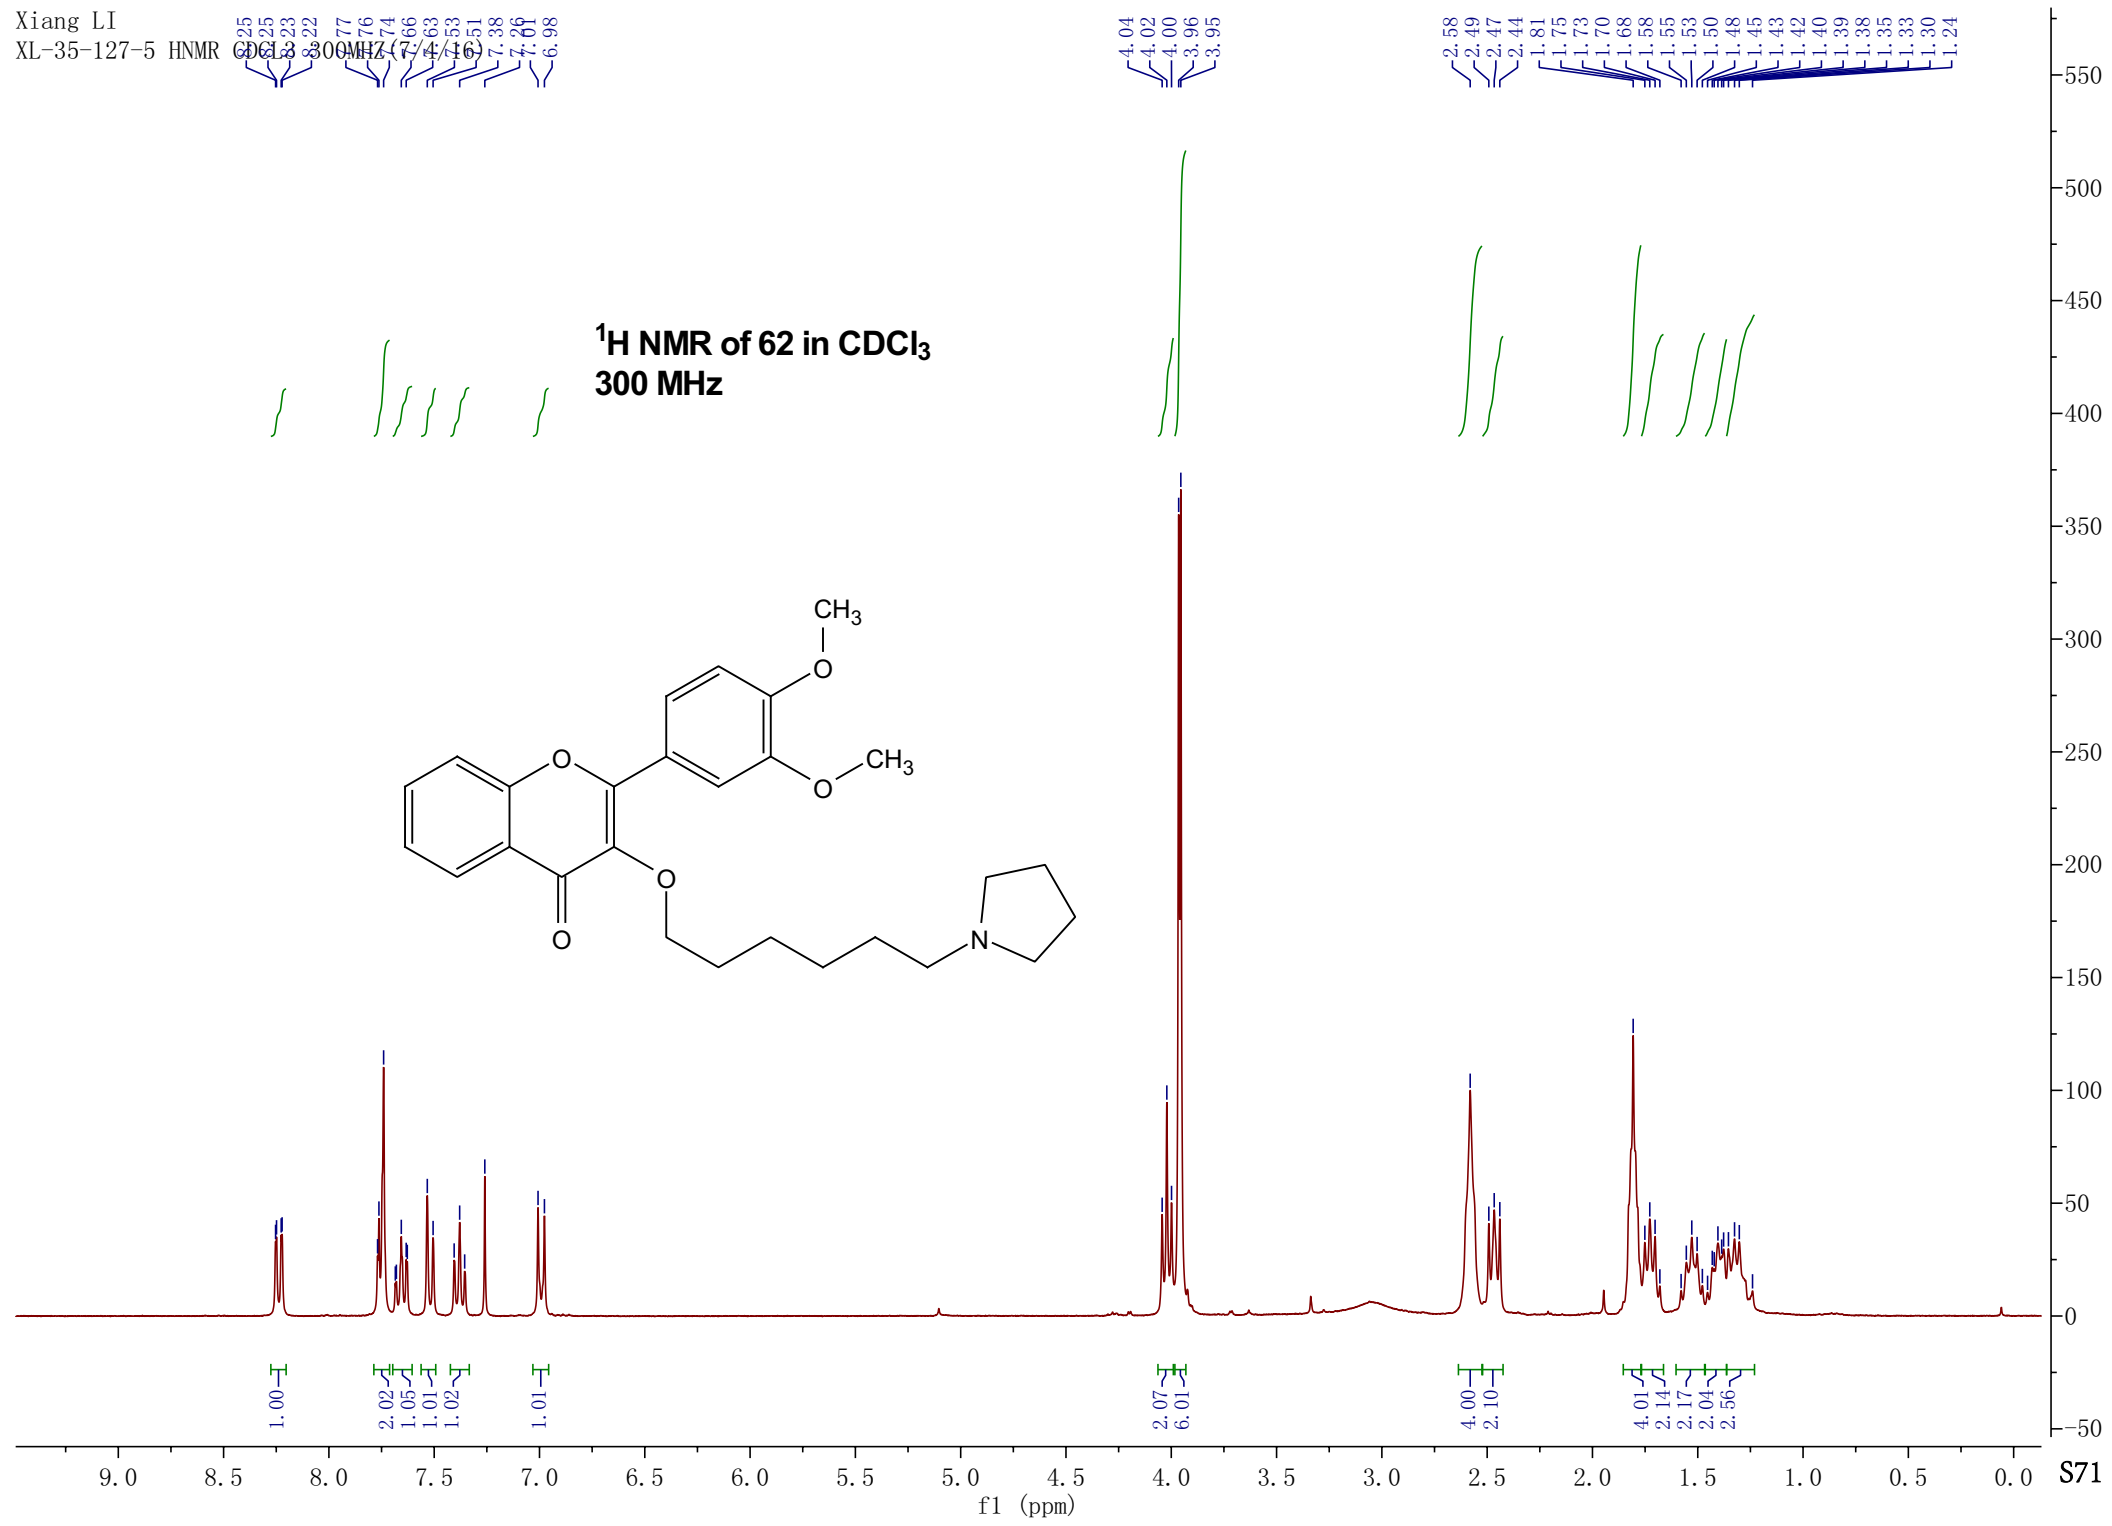

Xiang LI

XL-35-127-5 CNMR

CDCL3 75MHZ

(7/16/16)

16

148.66

140.24

133.35

125.90

124.69

124.30

123.72

122.38

118.01

111.84

110.84

77.58

77.16

76.74

72.71

56.46

56.16

56.11

54.15

30.25

28.48

27.45

25.94

23.49

173.18

154.80

154.27

151.20

148.66

140.24

133.35

125.90

124.69

124.30

123.72

122.38

118.01

111.84

110.84

77.58

77.16

76.74

72.71

56.46

56.16

56.11

54.15

30.25

28.48

27.45

25.94

23.49

**<sup>13</sup>C NMR of 62 in CDCl<sub>3</sub>  
75 MHz**

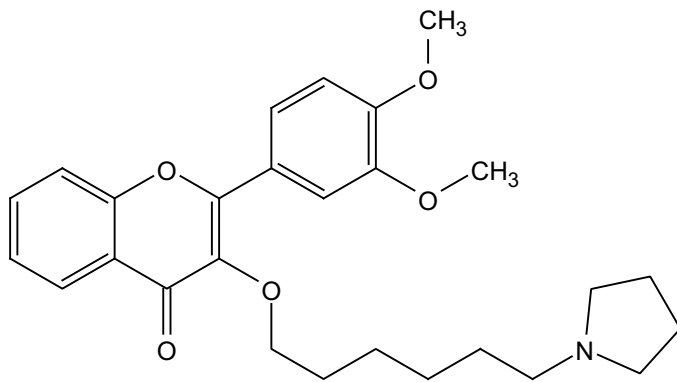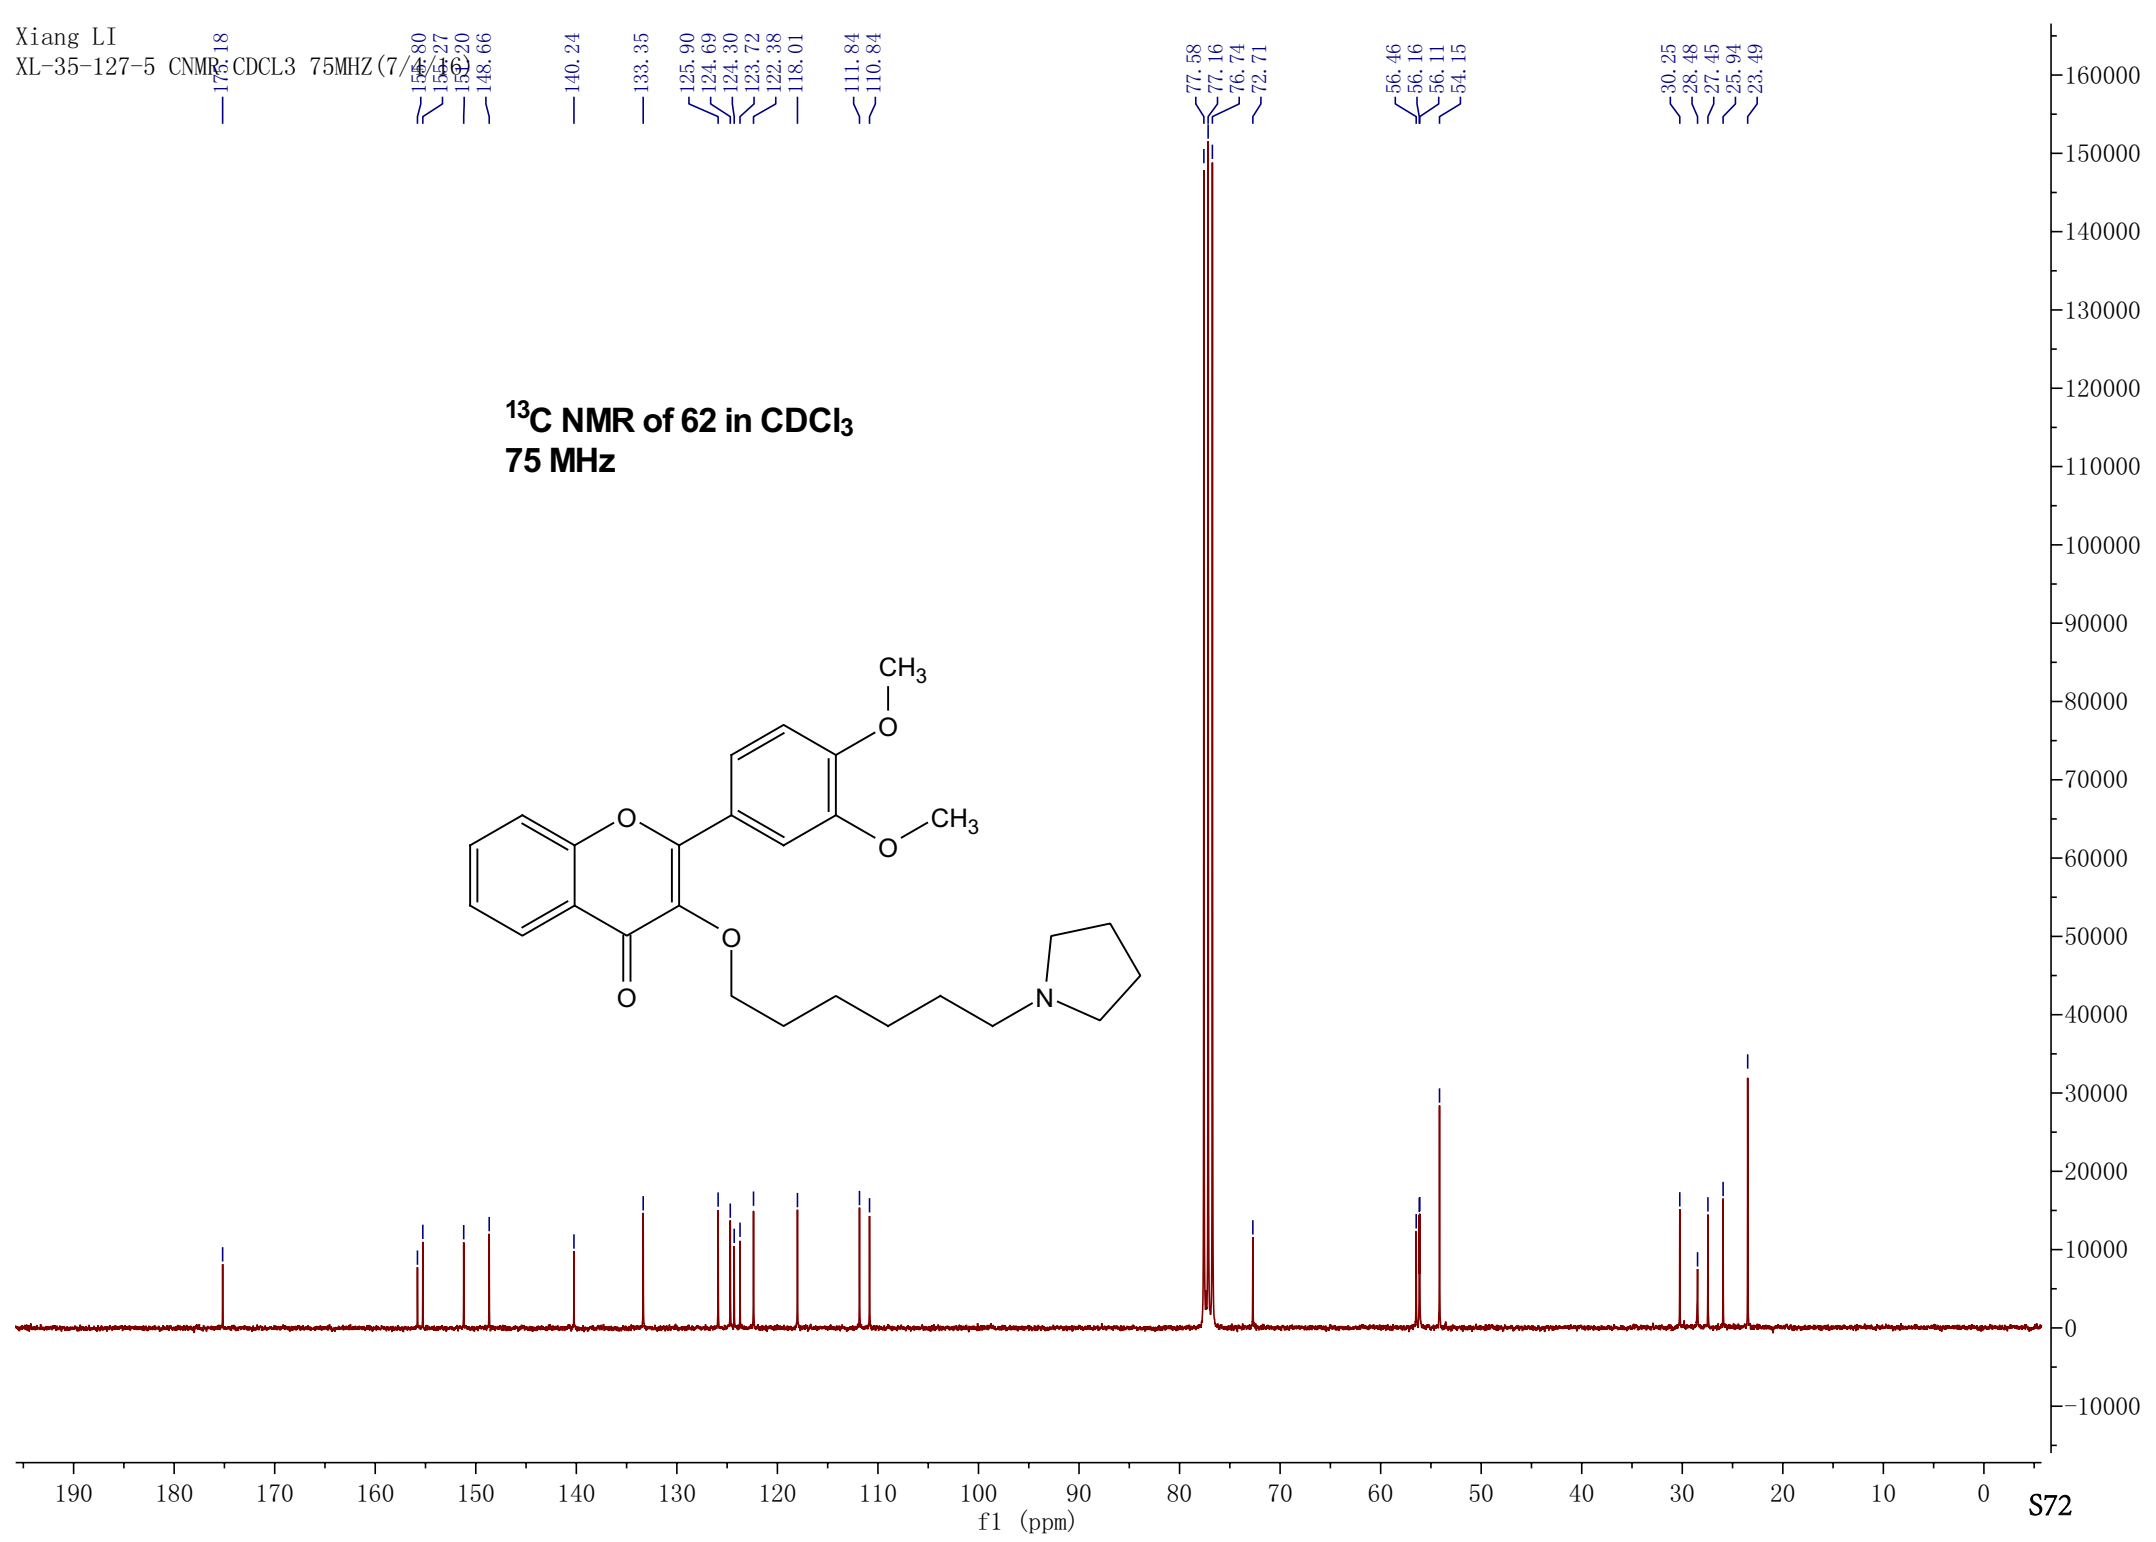

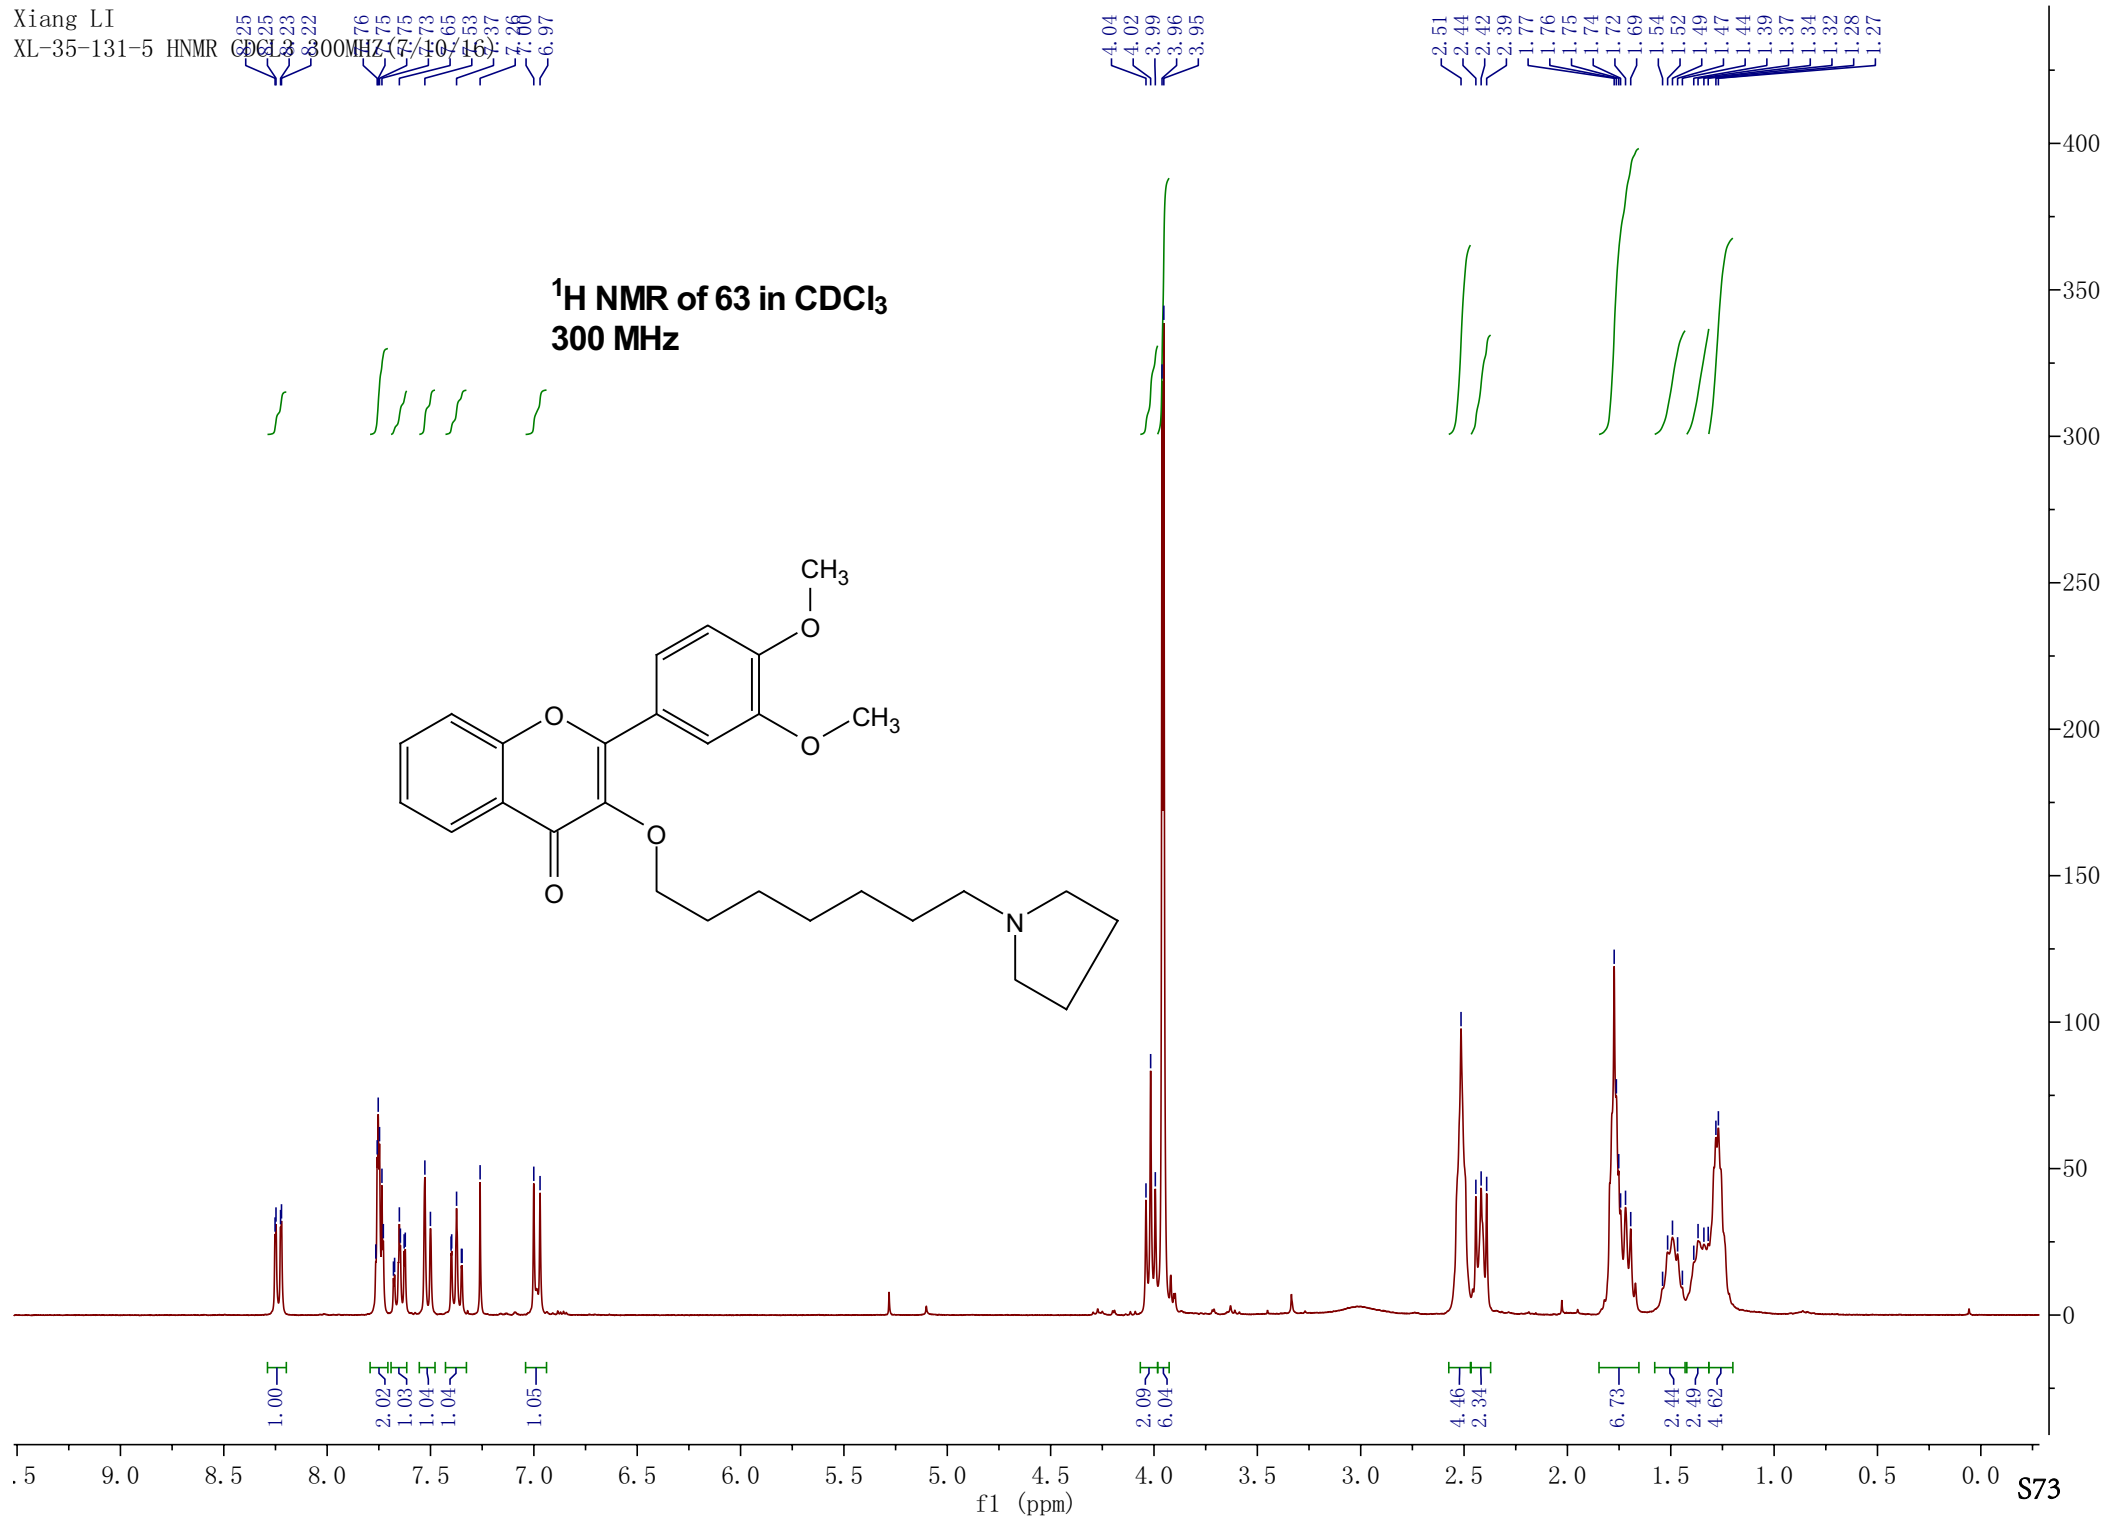

Xiang LI  
XL-35-131-5 CNMR CDCL3 75MHZ (7/14/16)

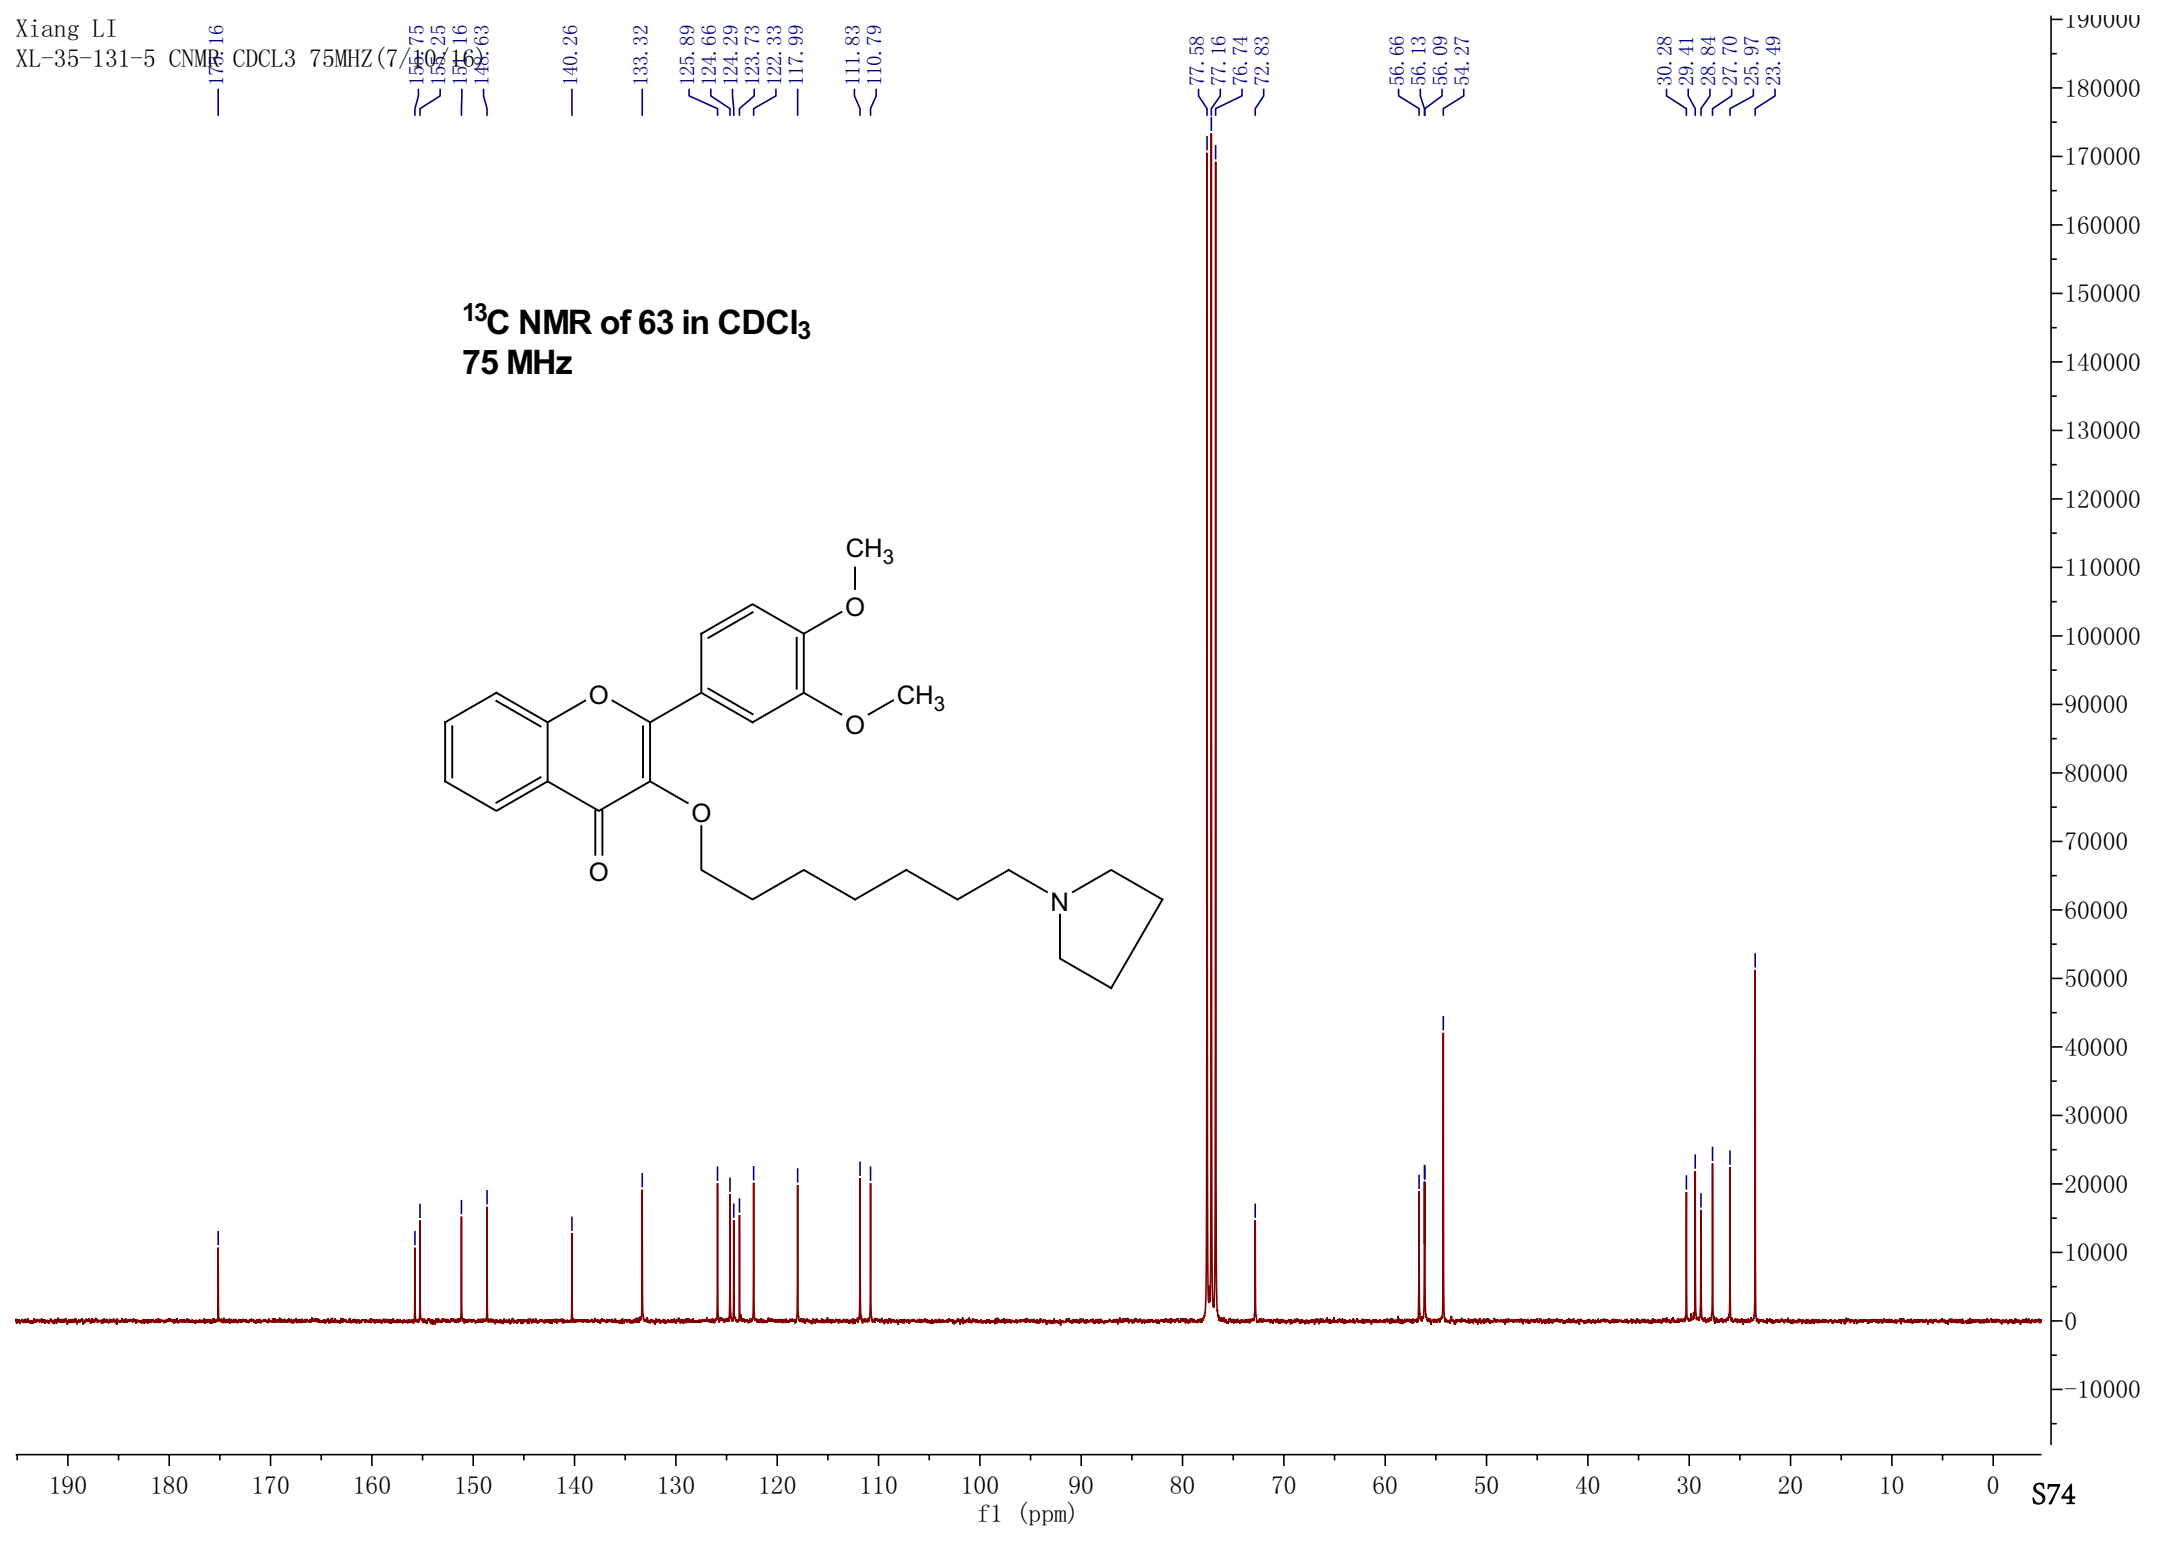

**<sup>1</sup>H NMR of 67 in CDCl<sub>3</sub>  
300 MHz**

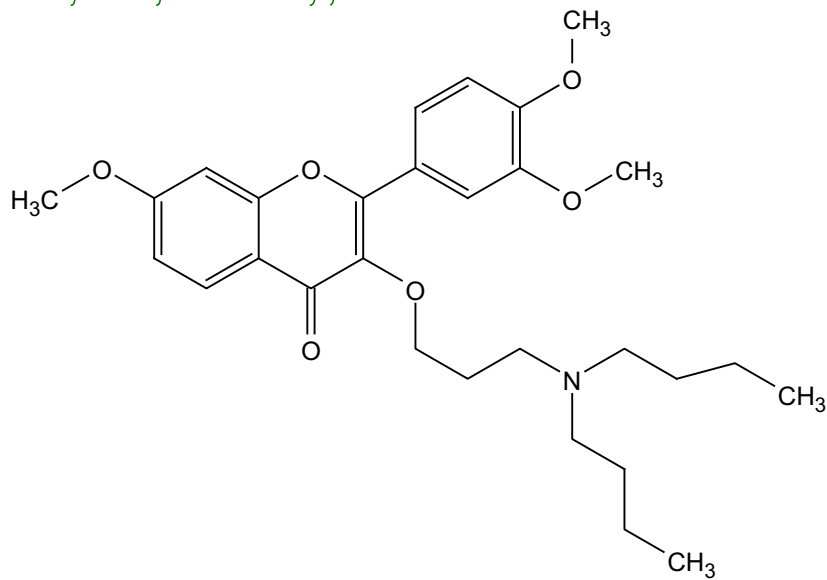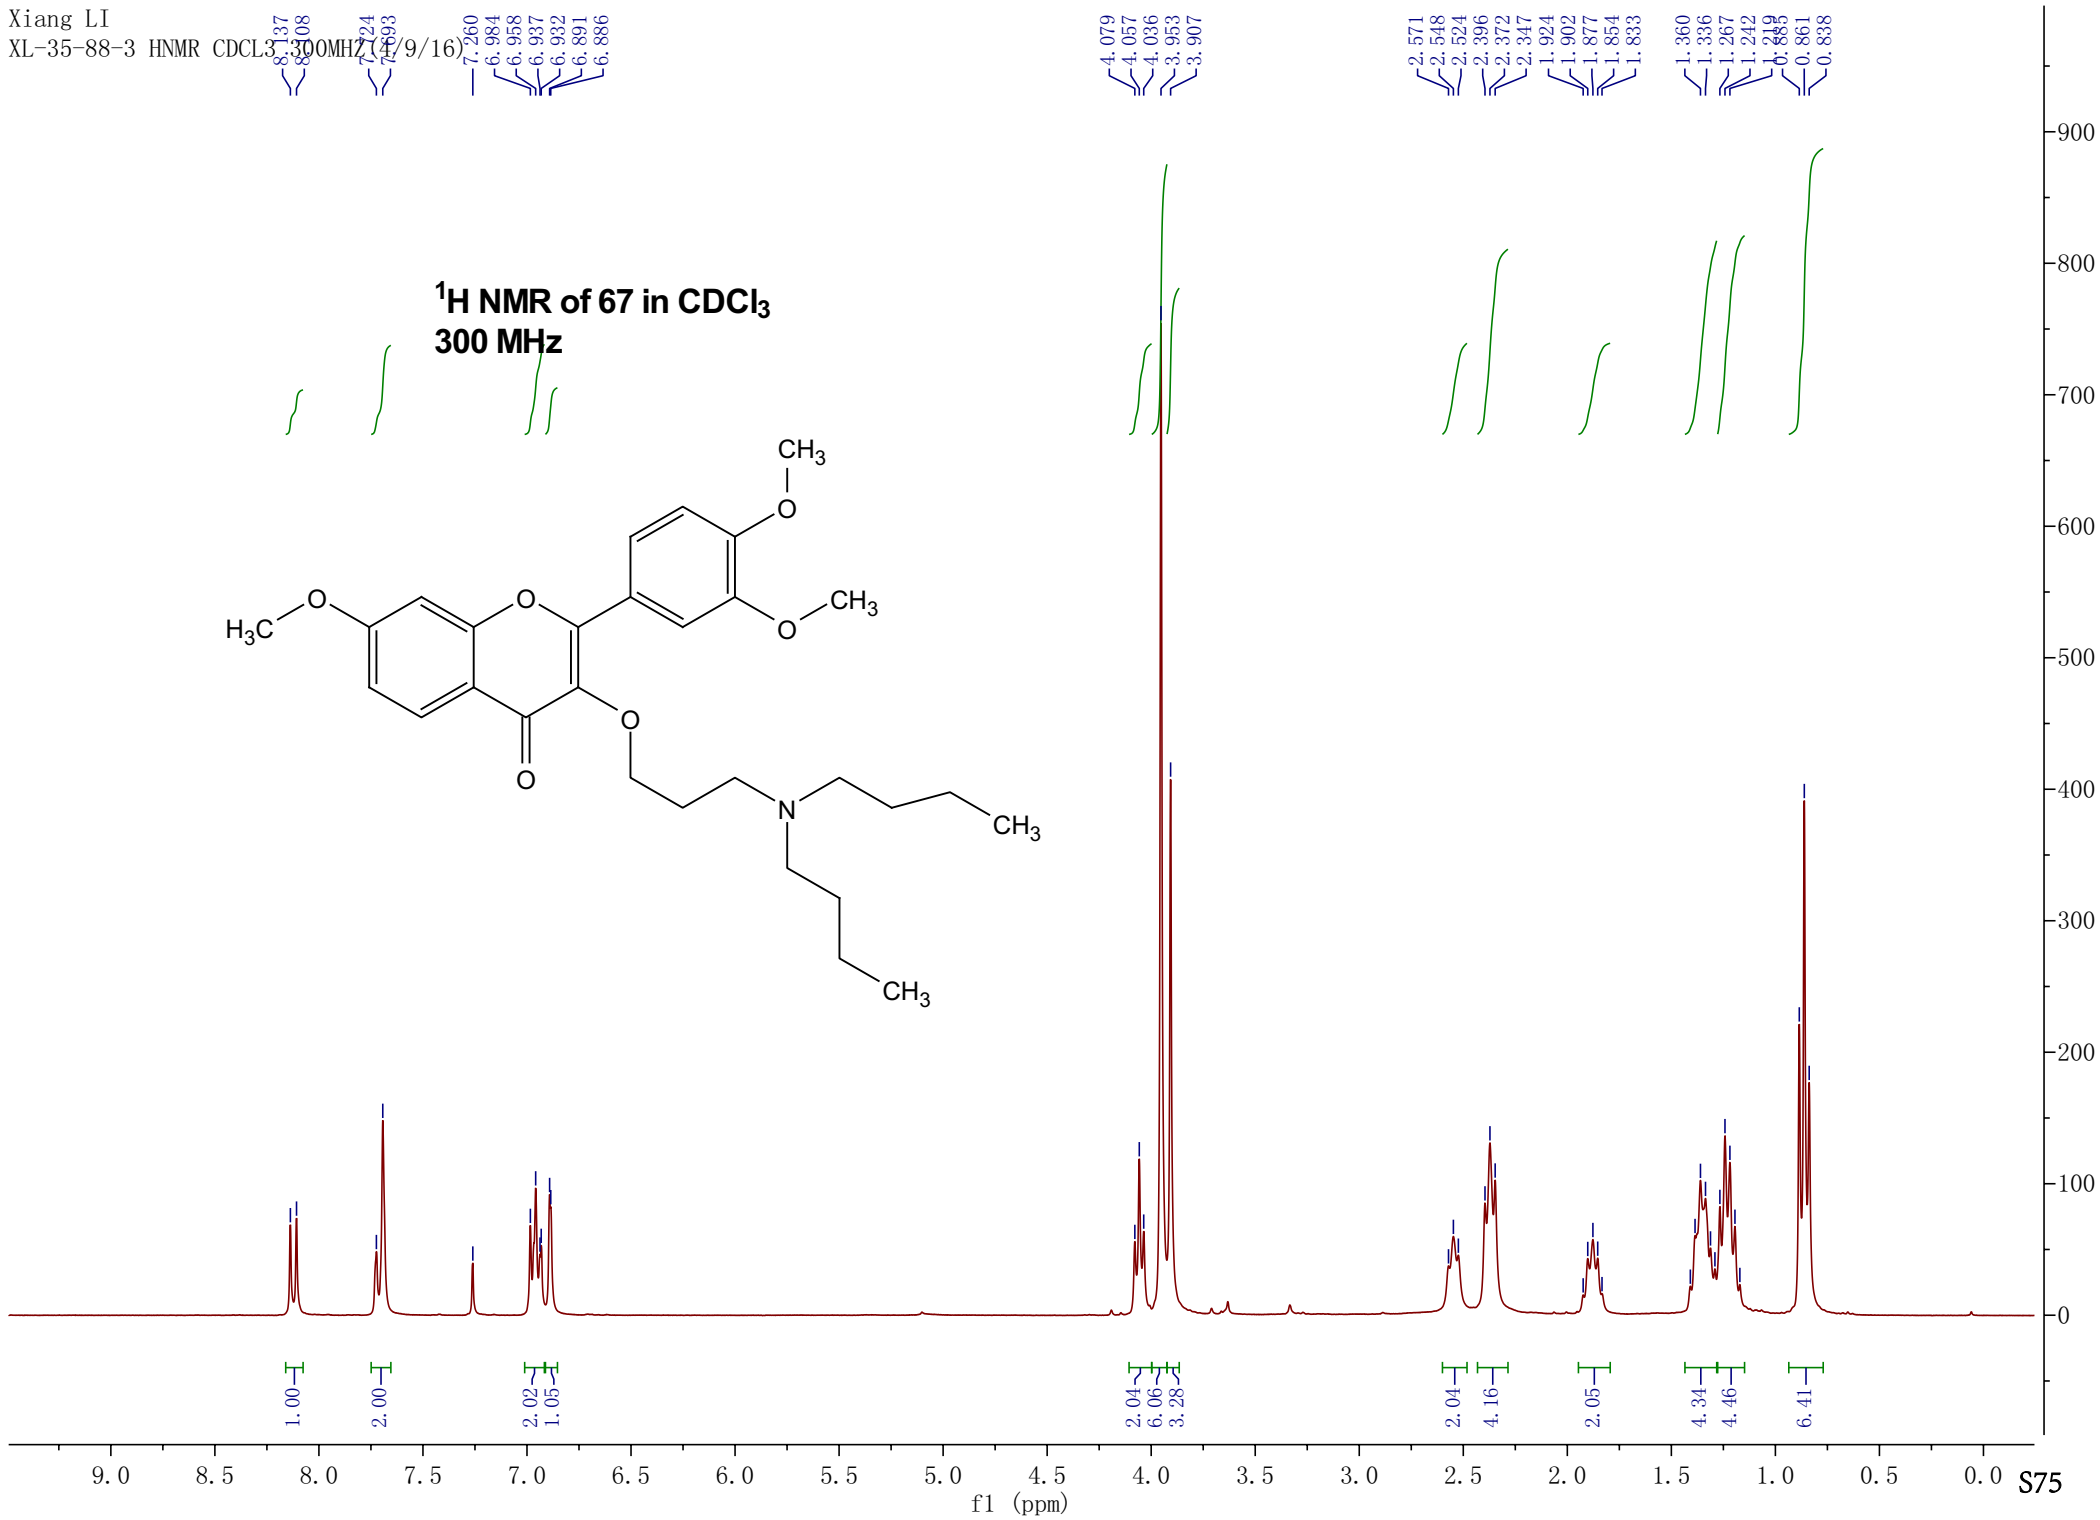

Xiang LI

XL-35-88-3 CNMR

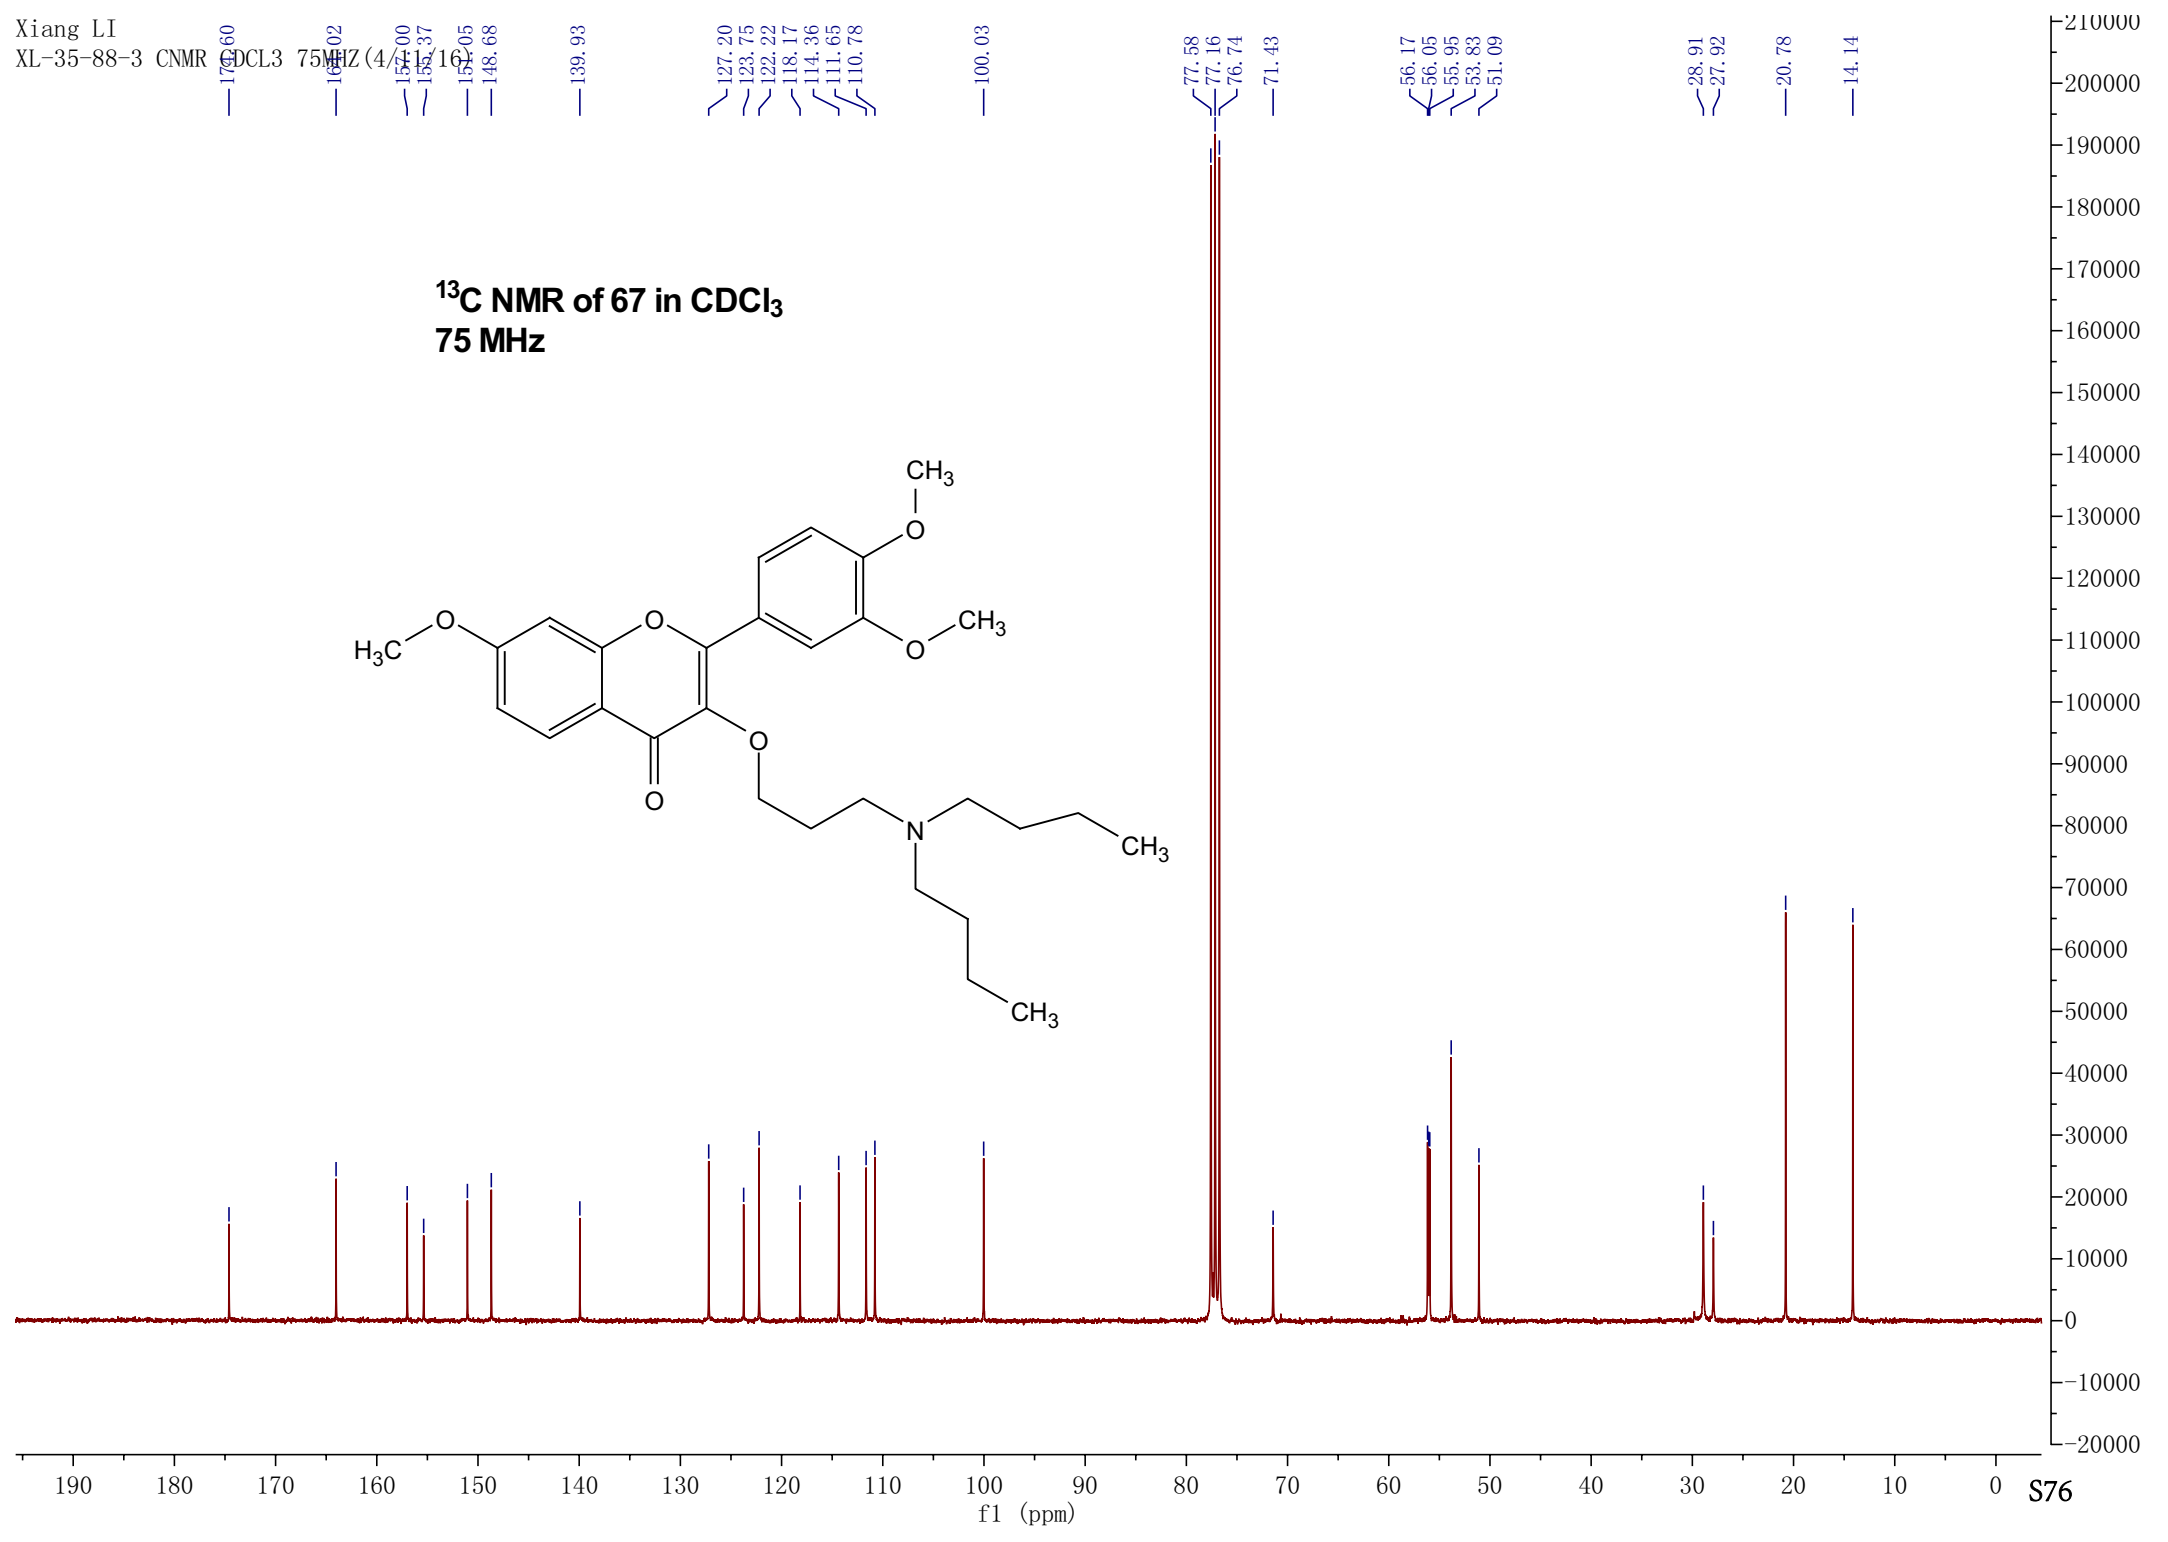



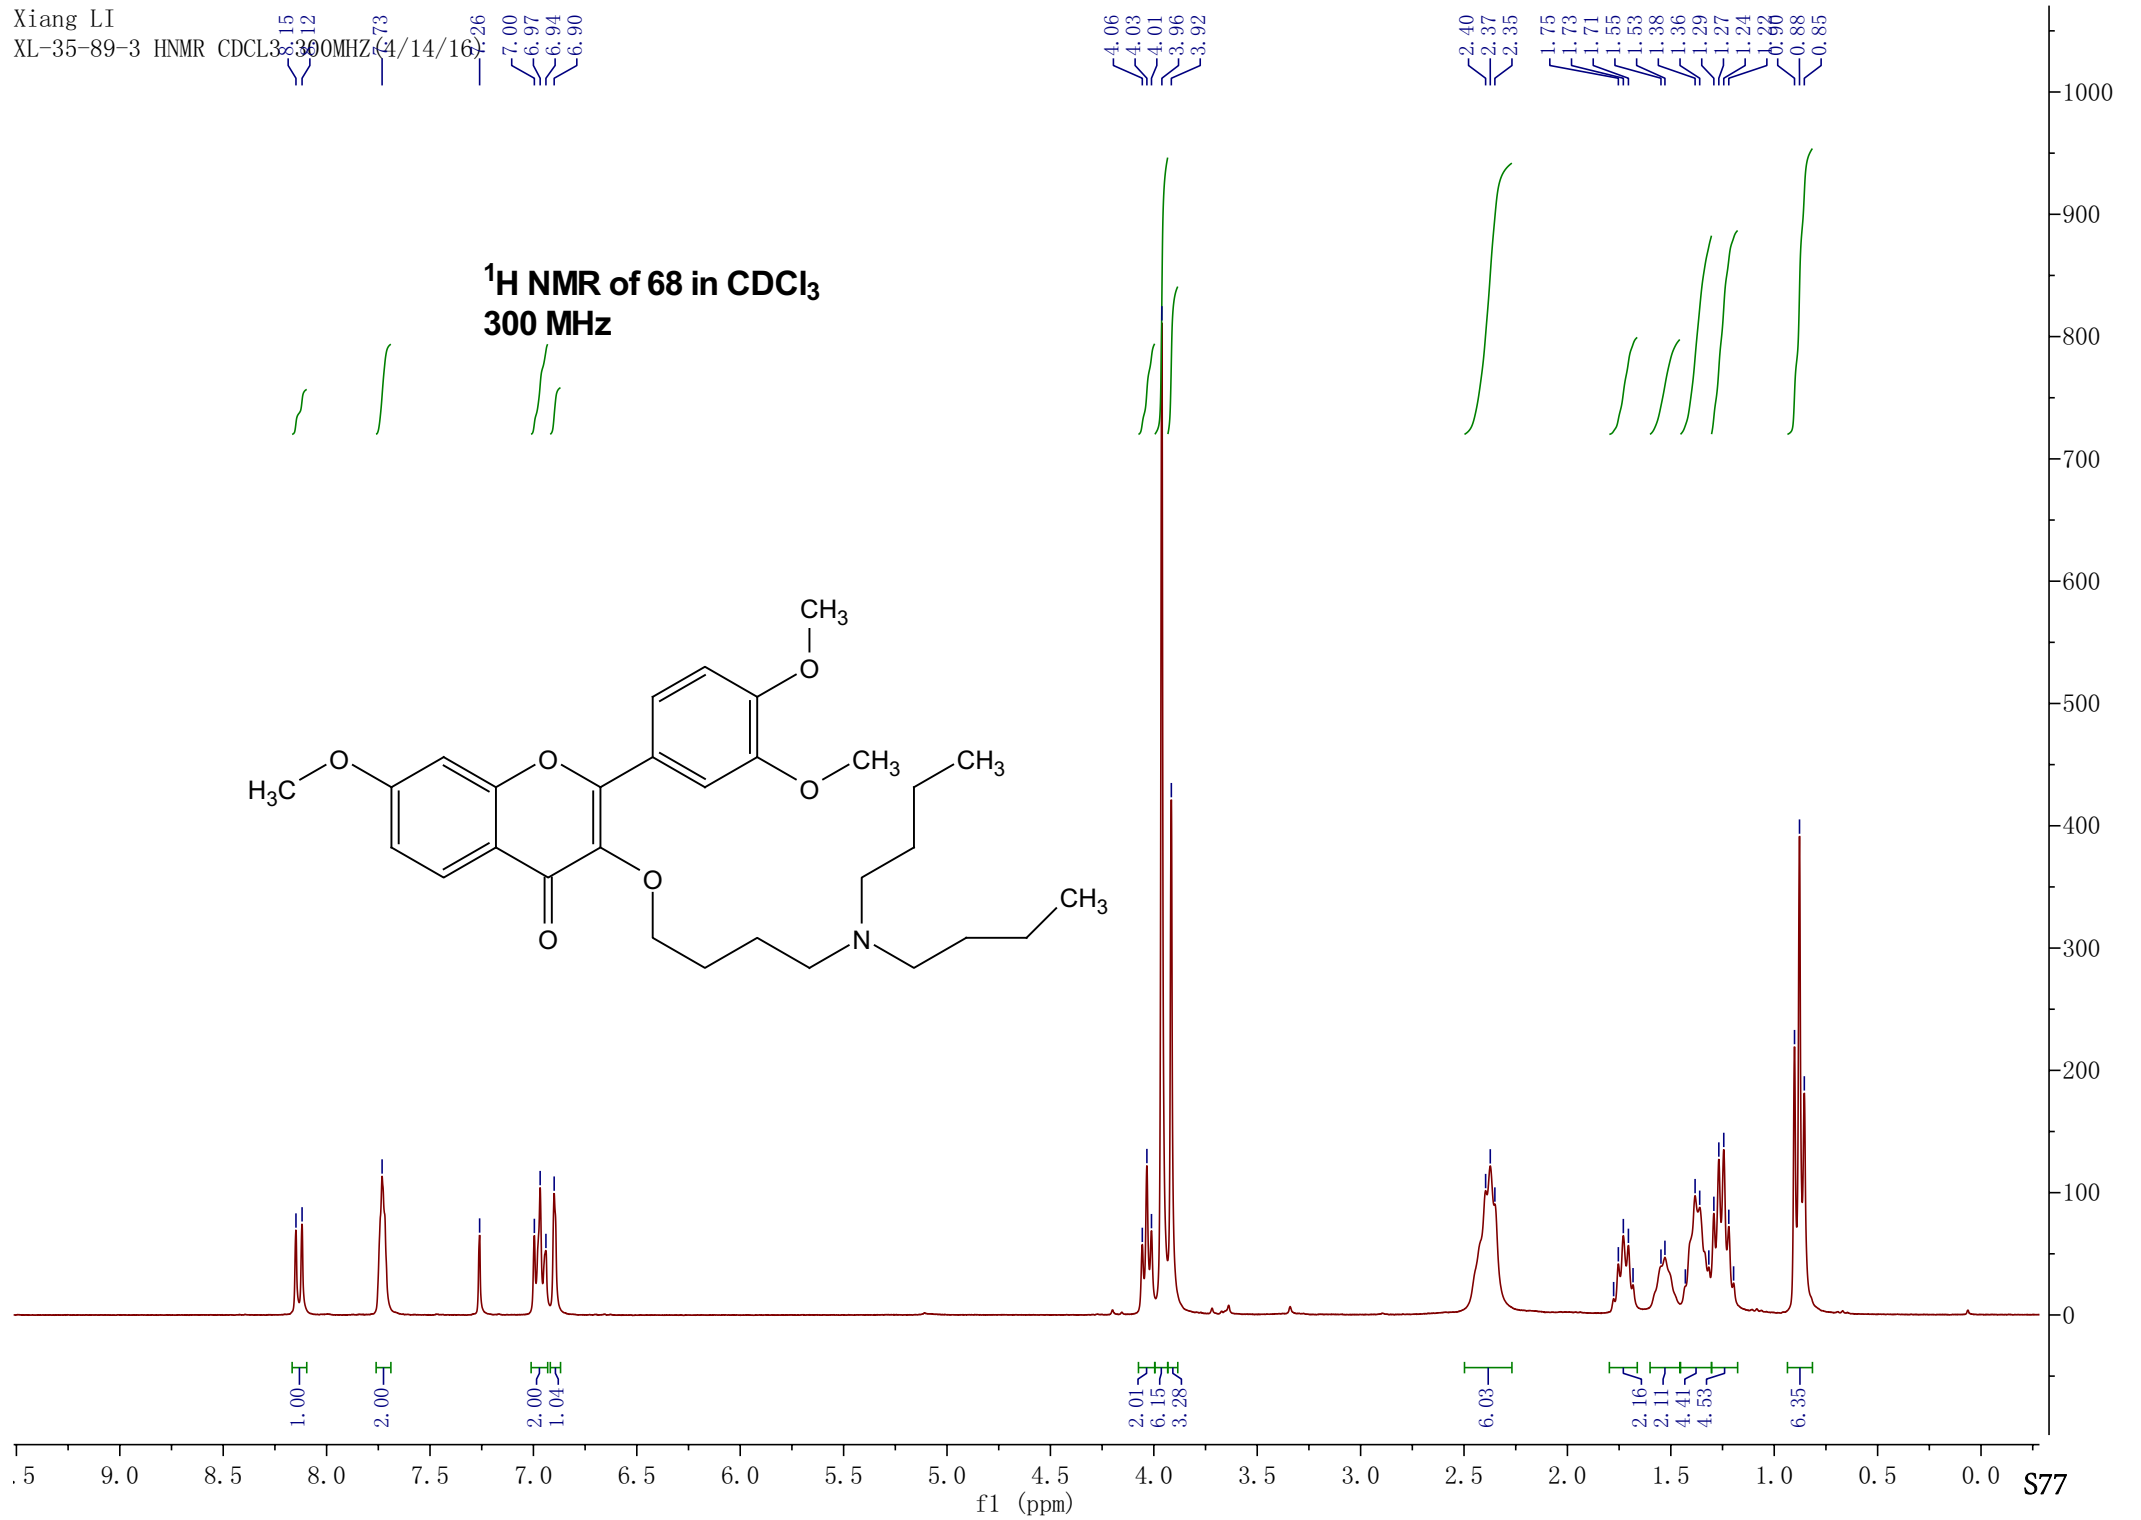

Xiang LI

XL-35-89-3 CNMR CDCL3 75MHz (4/14/16)

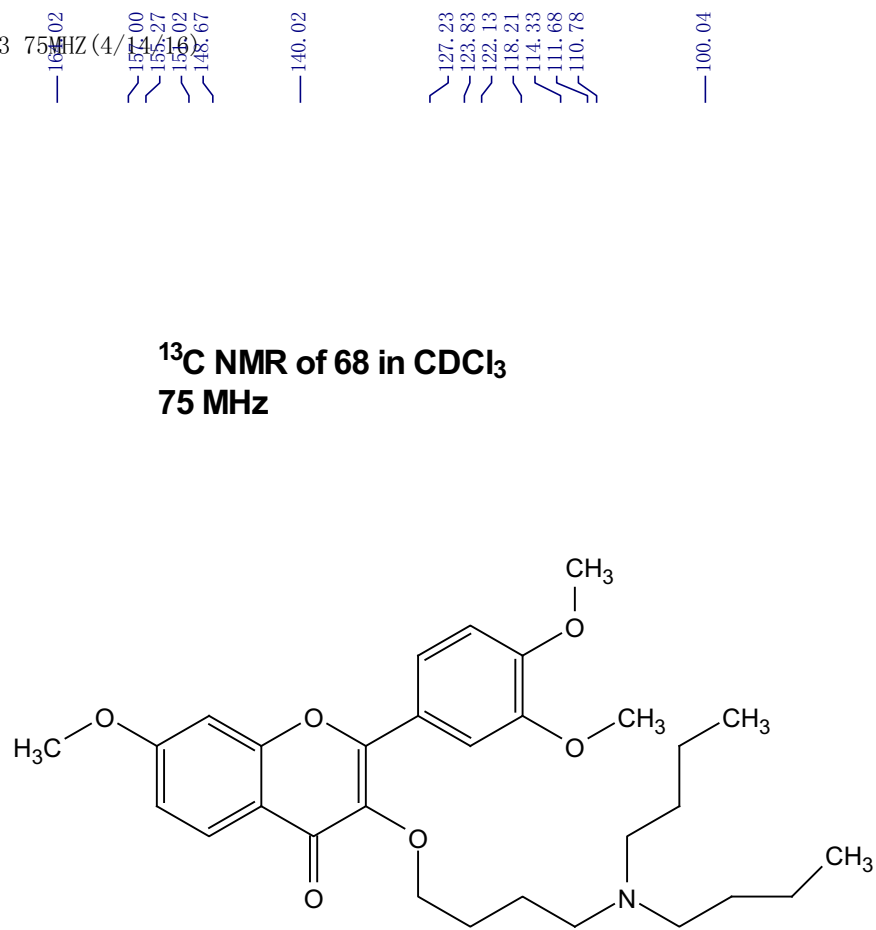

**<sup>13</sup>C NMR of 68 in CDCl<sub>3</sub>  
75 MHz**

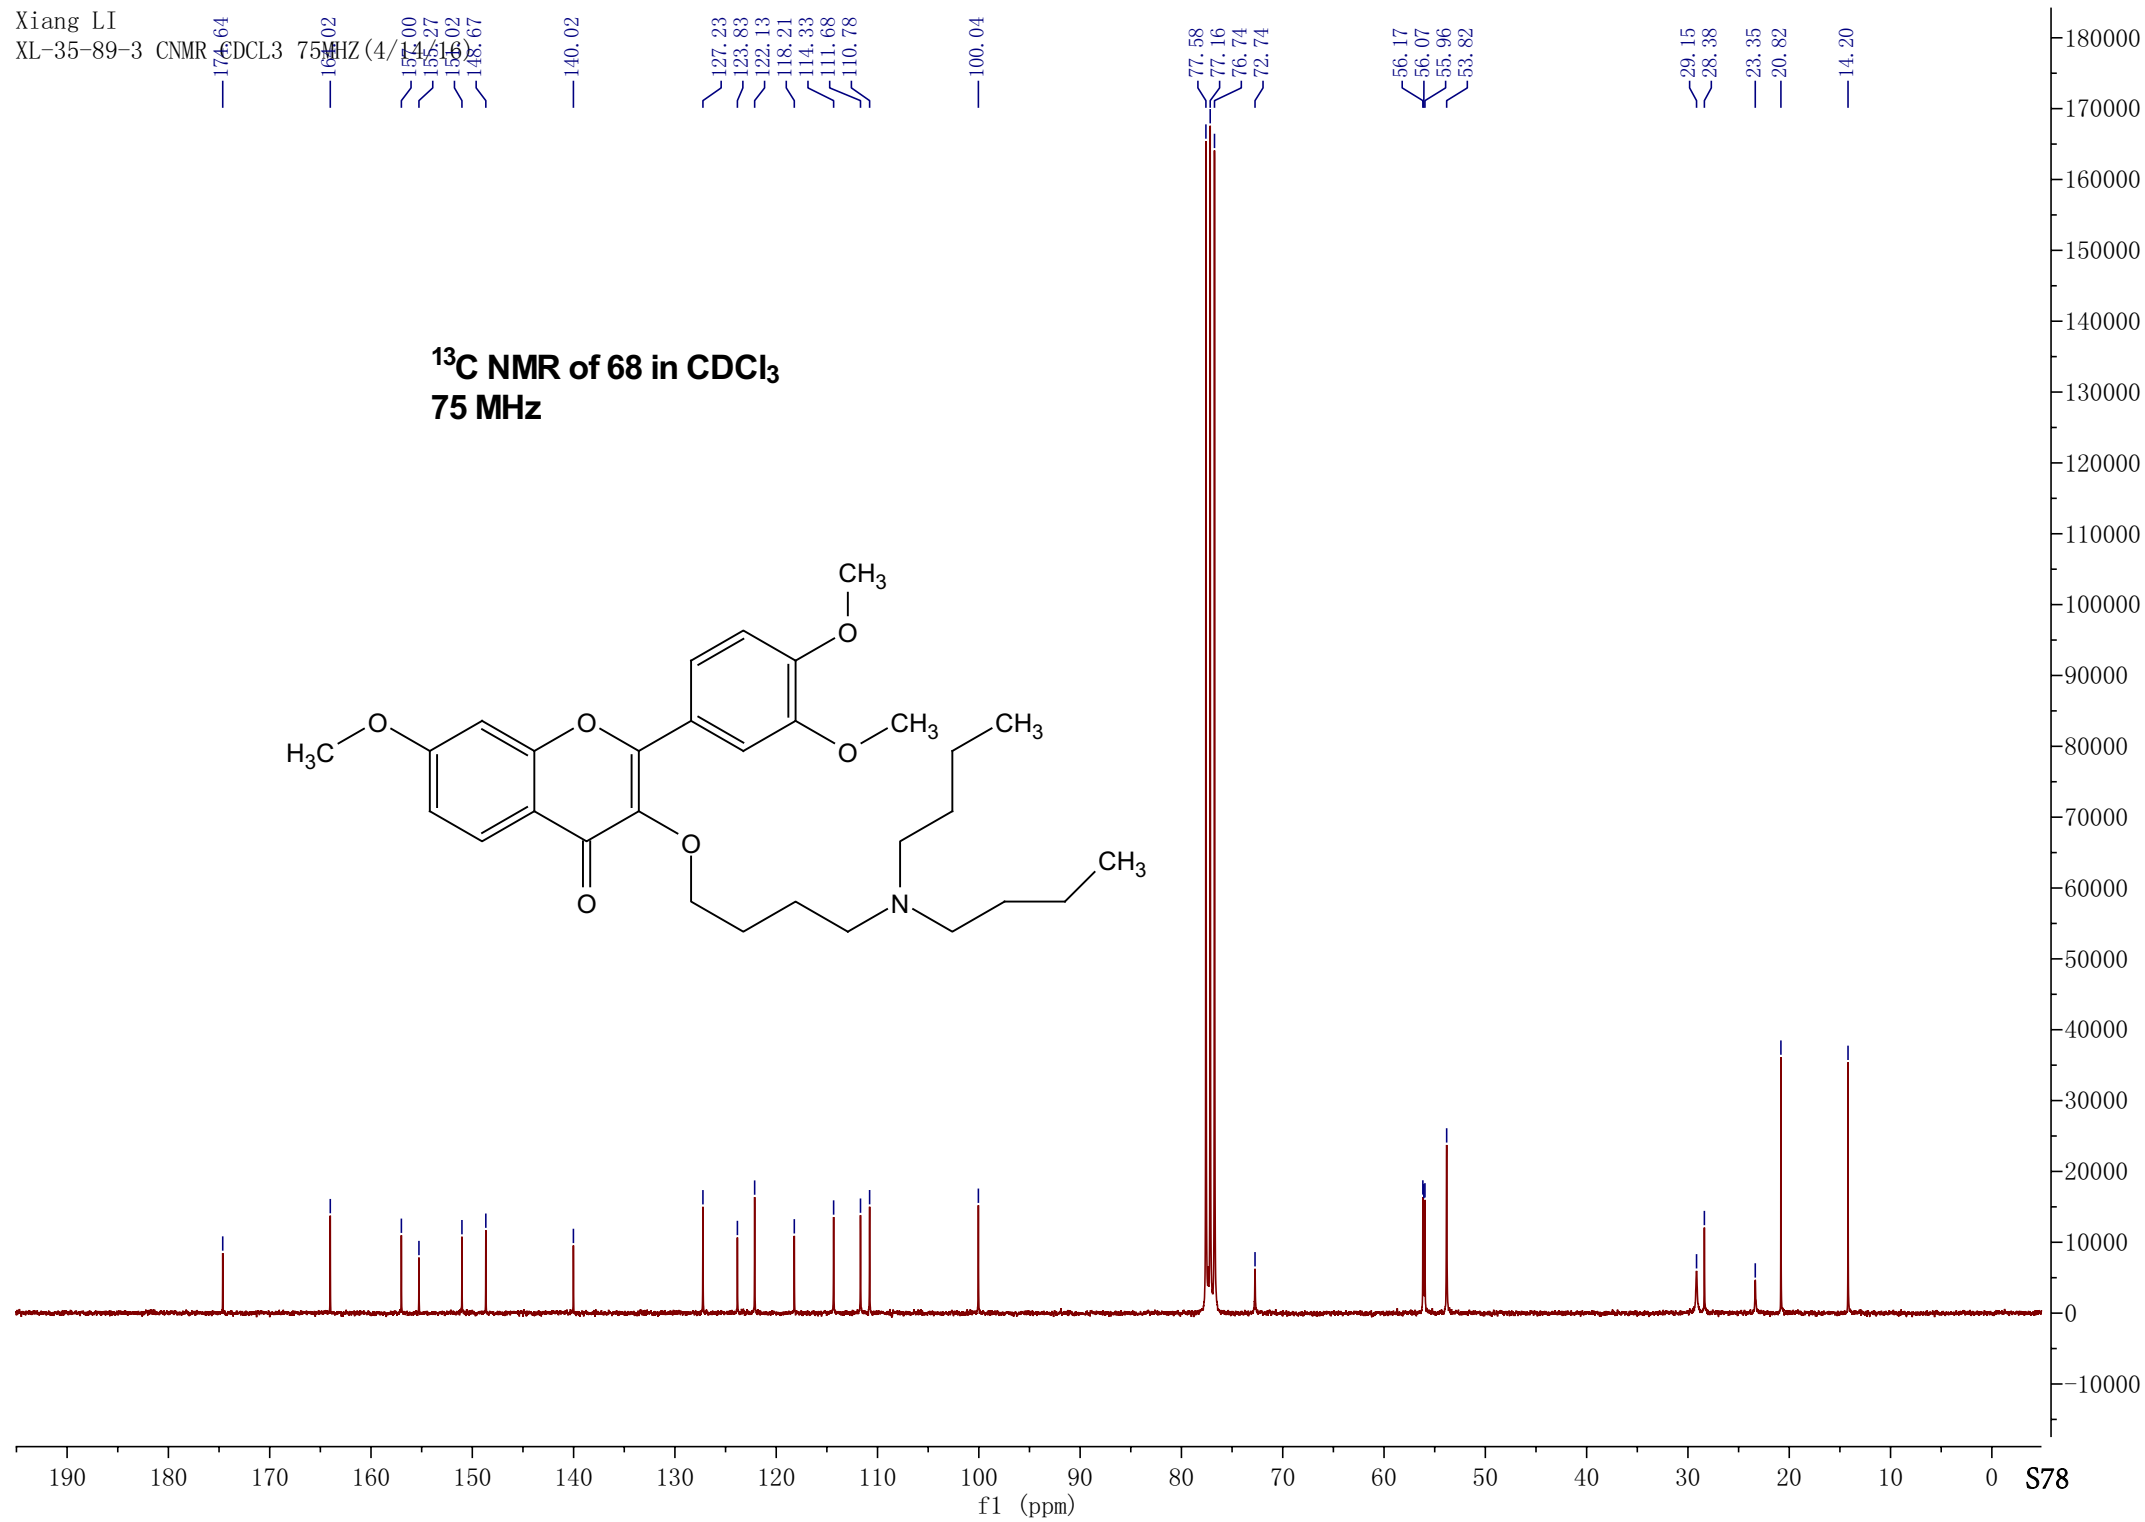

**<sup>1</sup>H NMR of 69 in CDCl<sub>3</sub>  
300 MHz**

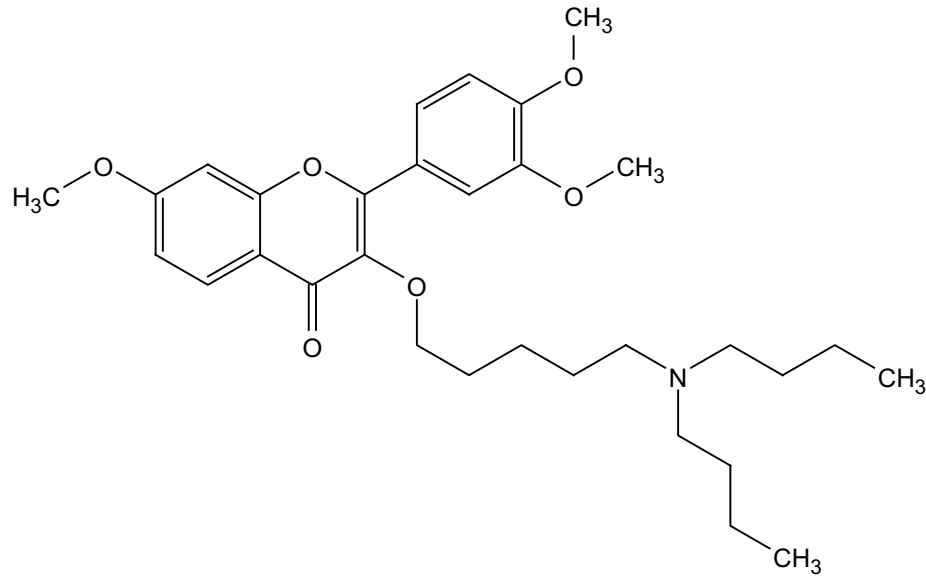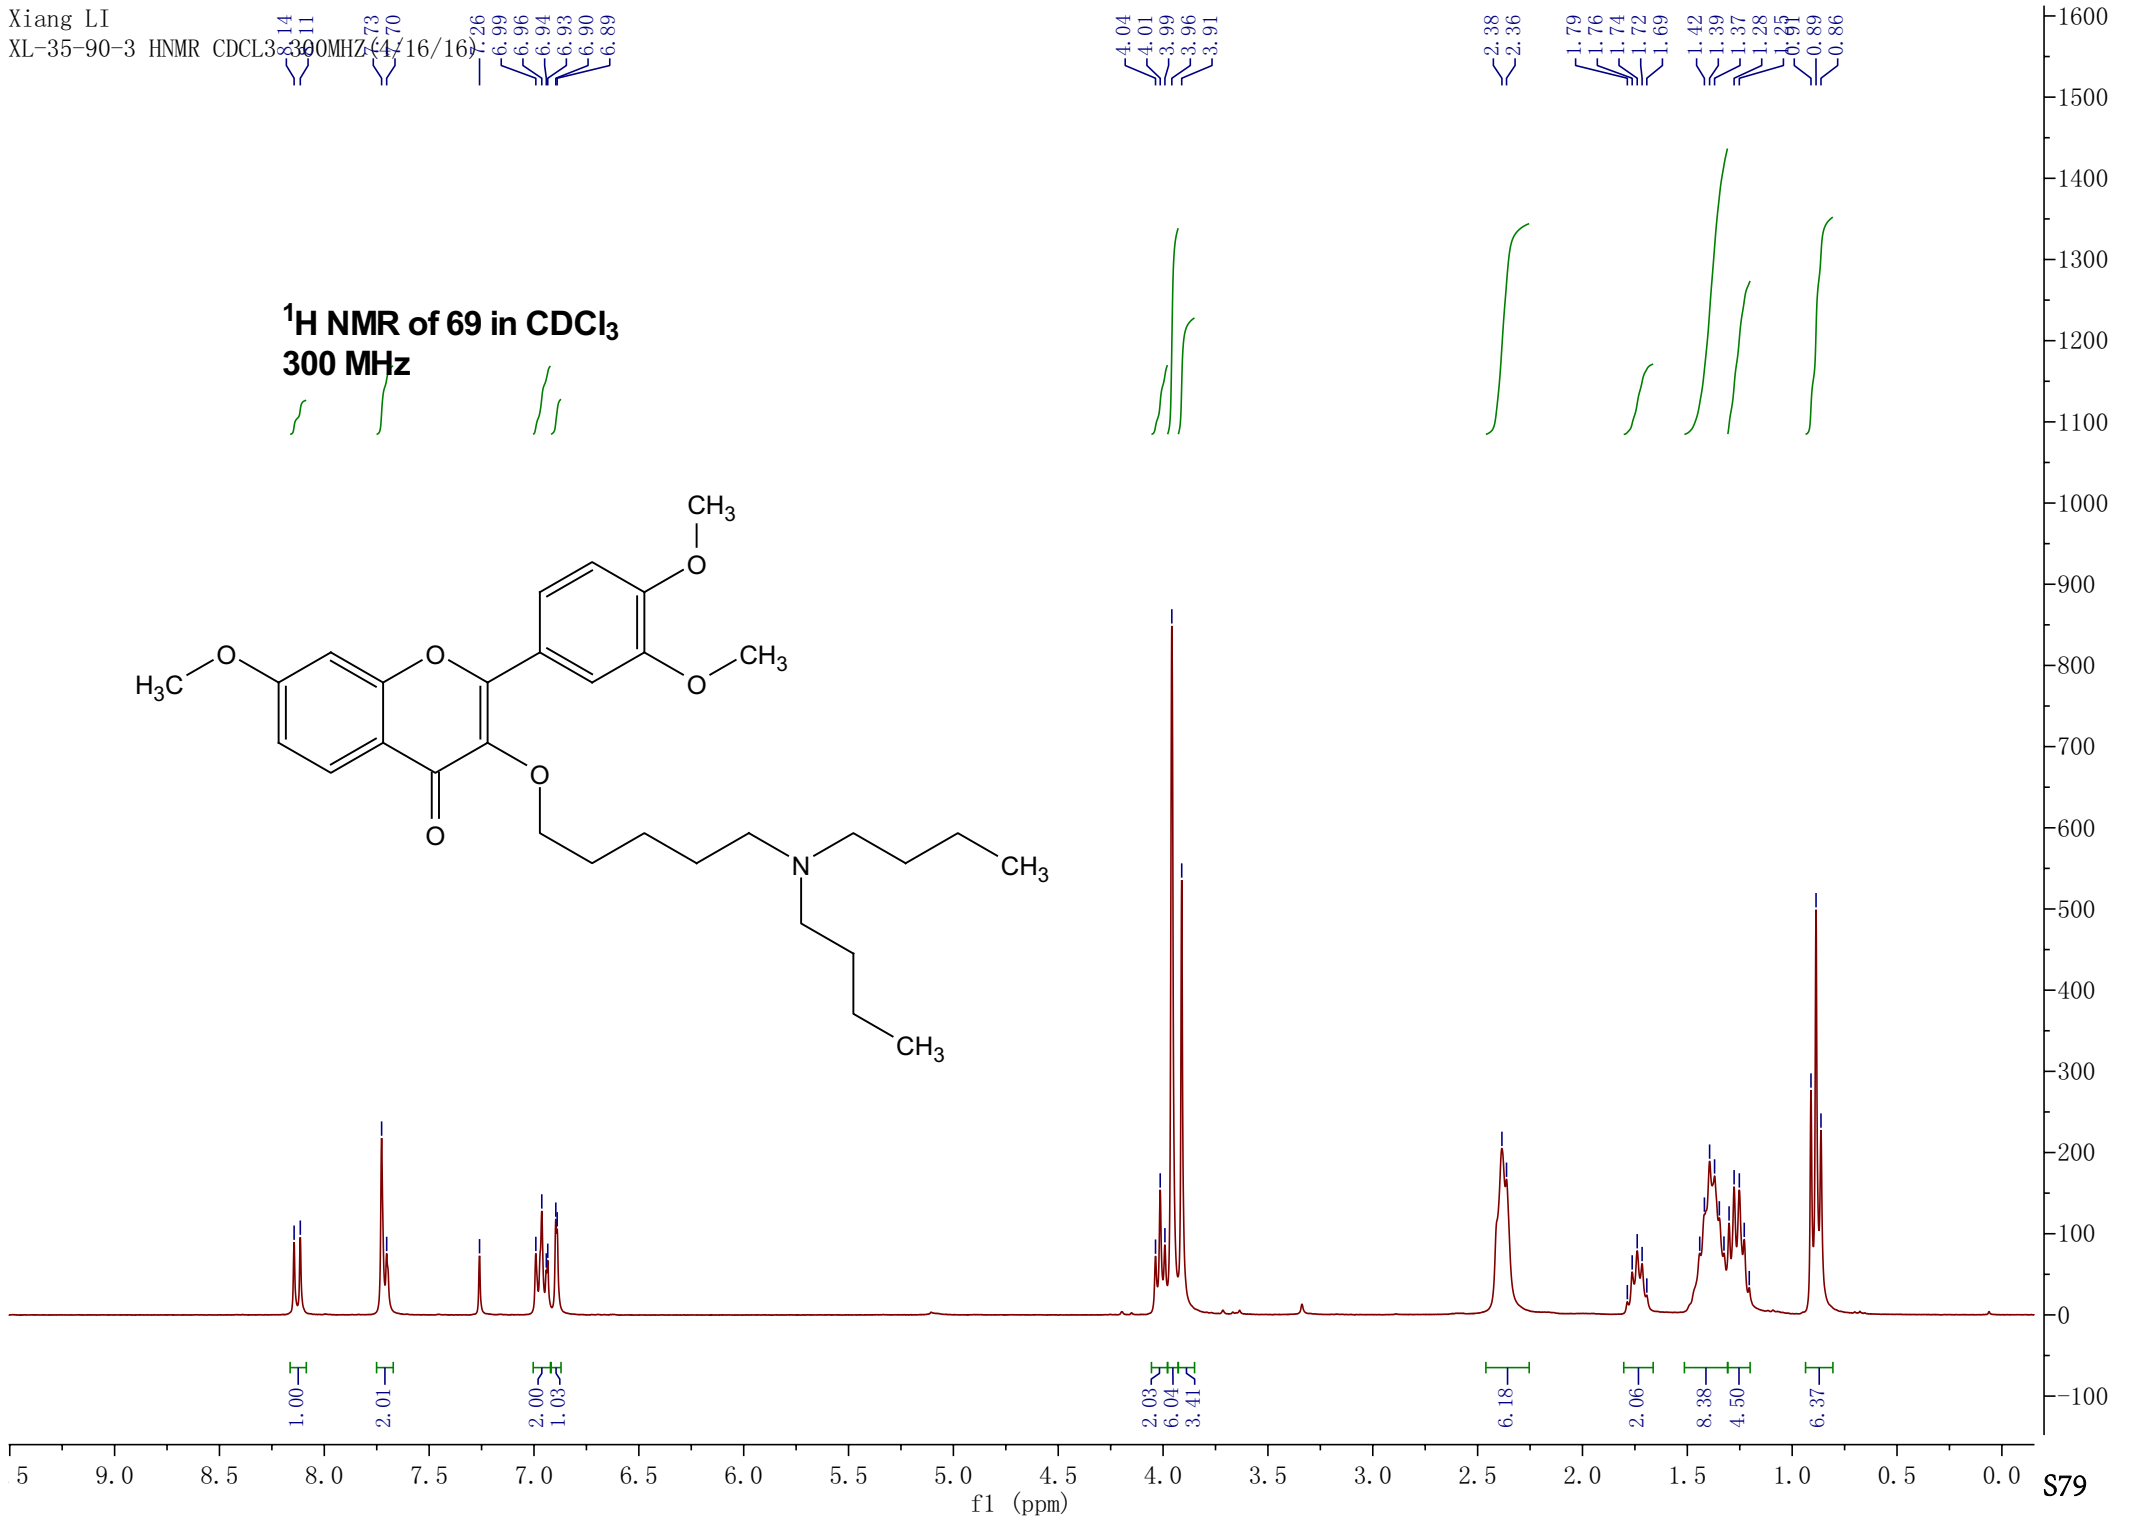

Xiang LI

XL-35-90-3 CNMR

CDCL3 75MHz (4/16/16)

**<sup>13</sup>C NMR of 69 in CDCl<sub>3</sub>  
75 MHz**

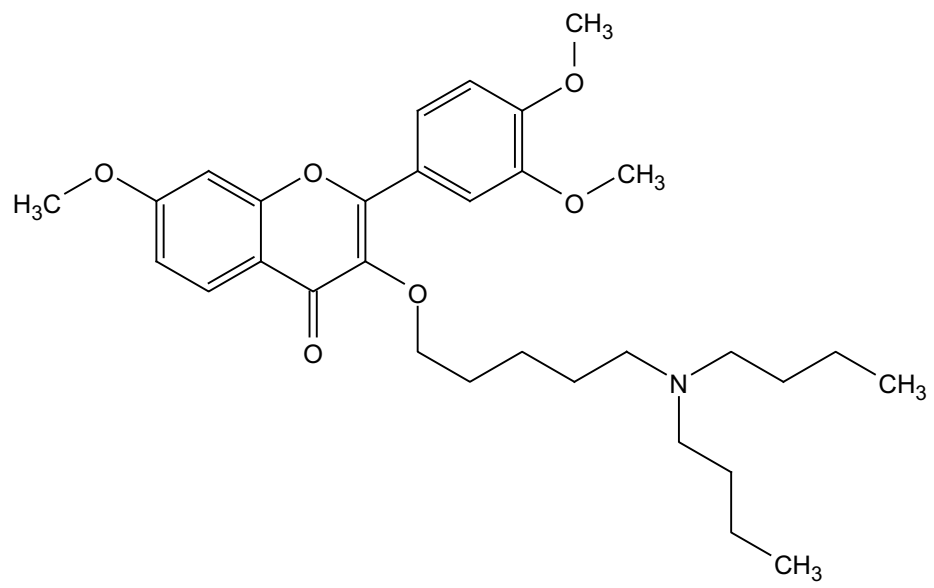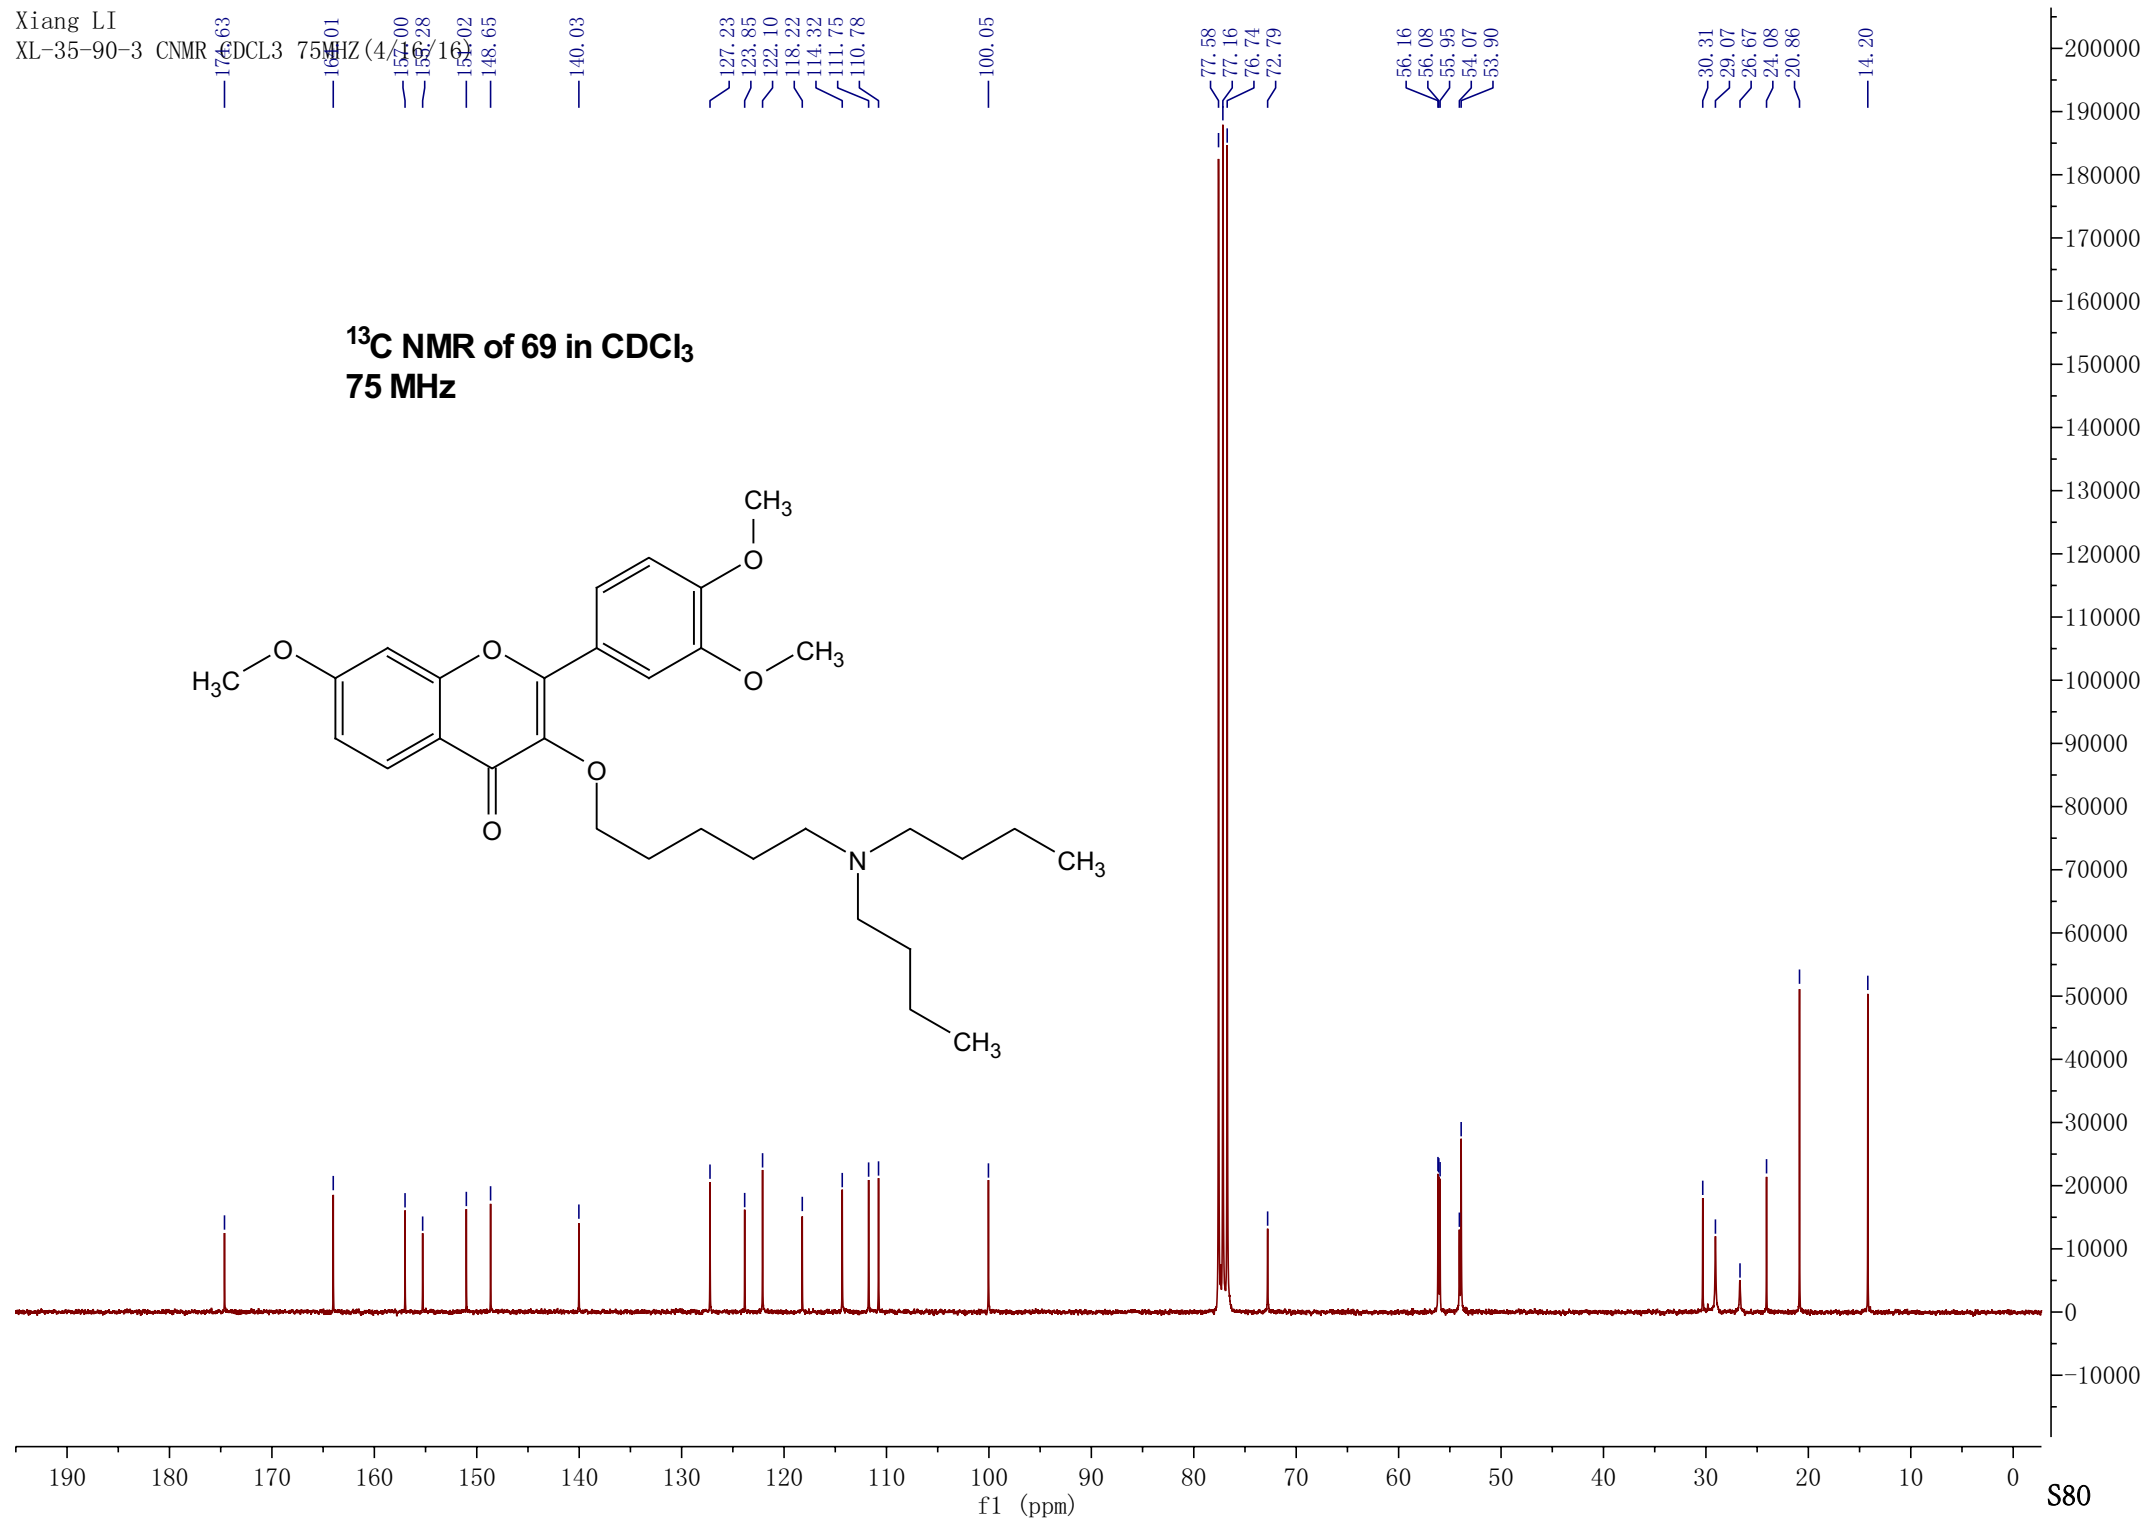

8.43  
8.13  
7.16  
7.10  
7.08  
7.02  
7.671  
7.260  
6.993  
6.984  
6.976  
6.965  
6.954  
6.947  
6.903  
6.896

4.091  
4.070  
4.049  
3.961  
3.917  
3.712  
3.697  
3.682

2.552  
2.528  
2.503  
2.444  
1.981  
1.959  
1.934  
1.911  
1.889

**<sup>1</sup>H NMR of 70 in CDCl<sub>3</sub>  
300 MHz**

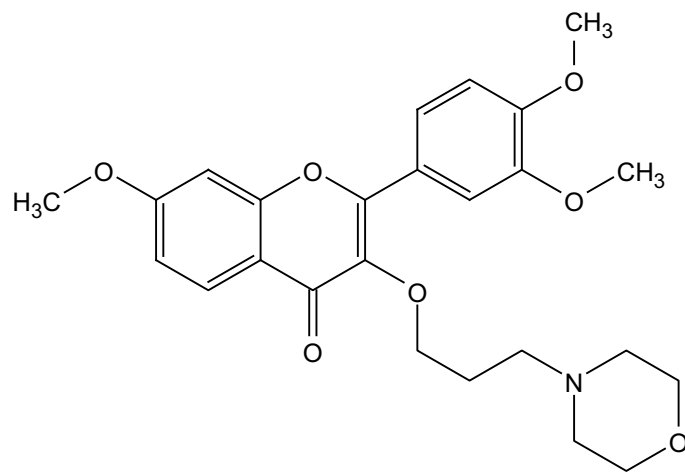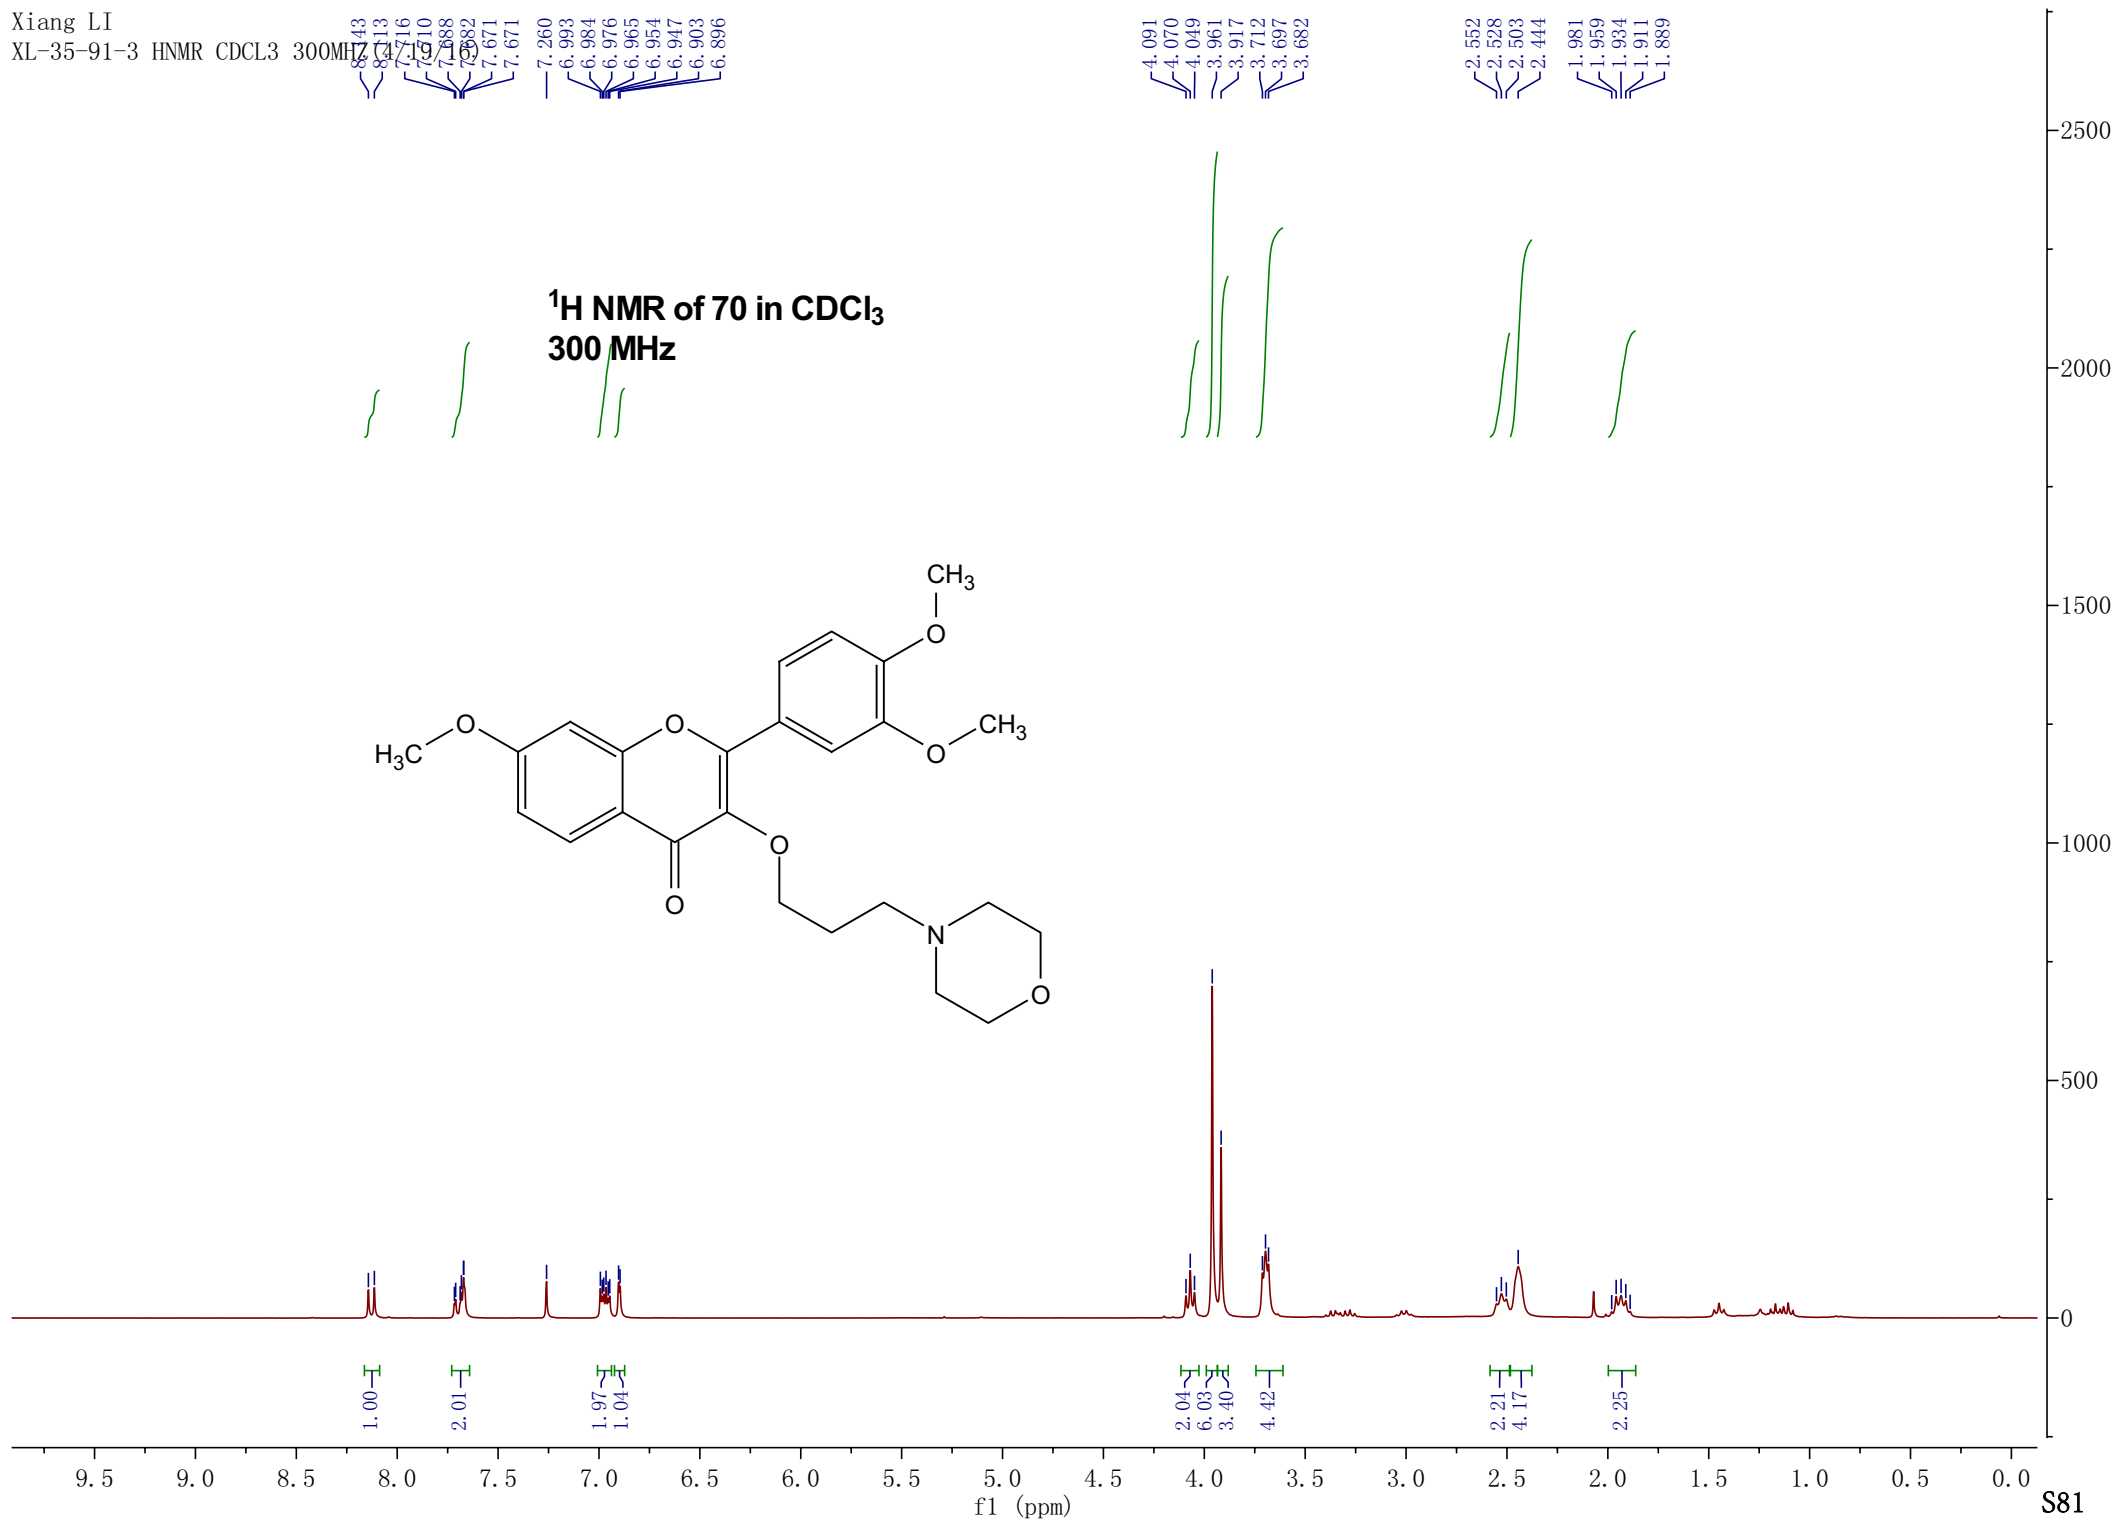

Xiang LI

XL-35-91-3 CNMR CDCL3 75MHz (4/16/16)

**<sup>13</sup>C NMR of 70 in CDCl<sub>3</sub>  
75 MHz**

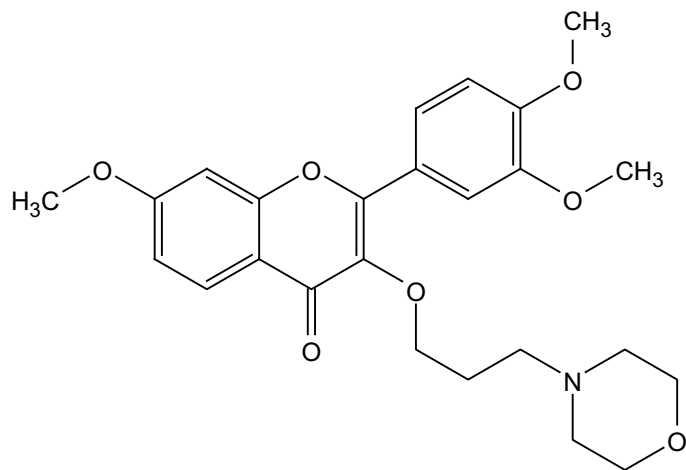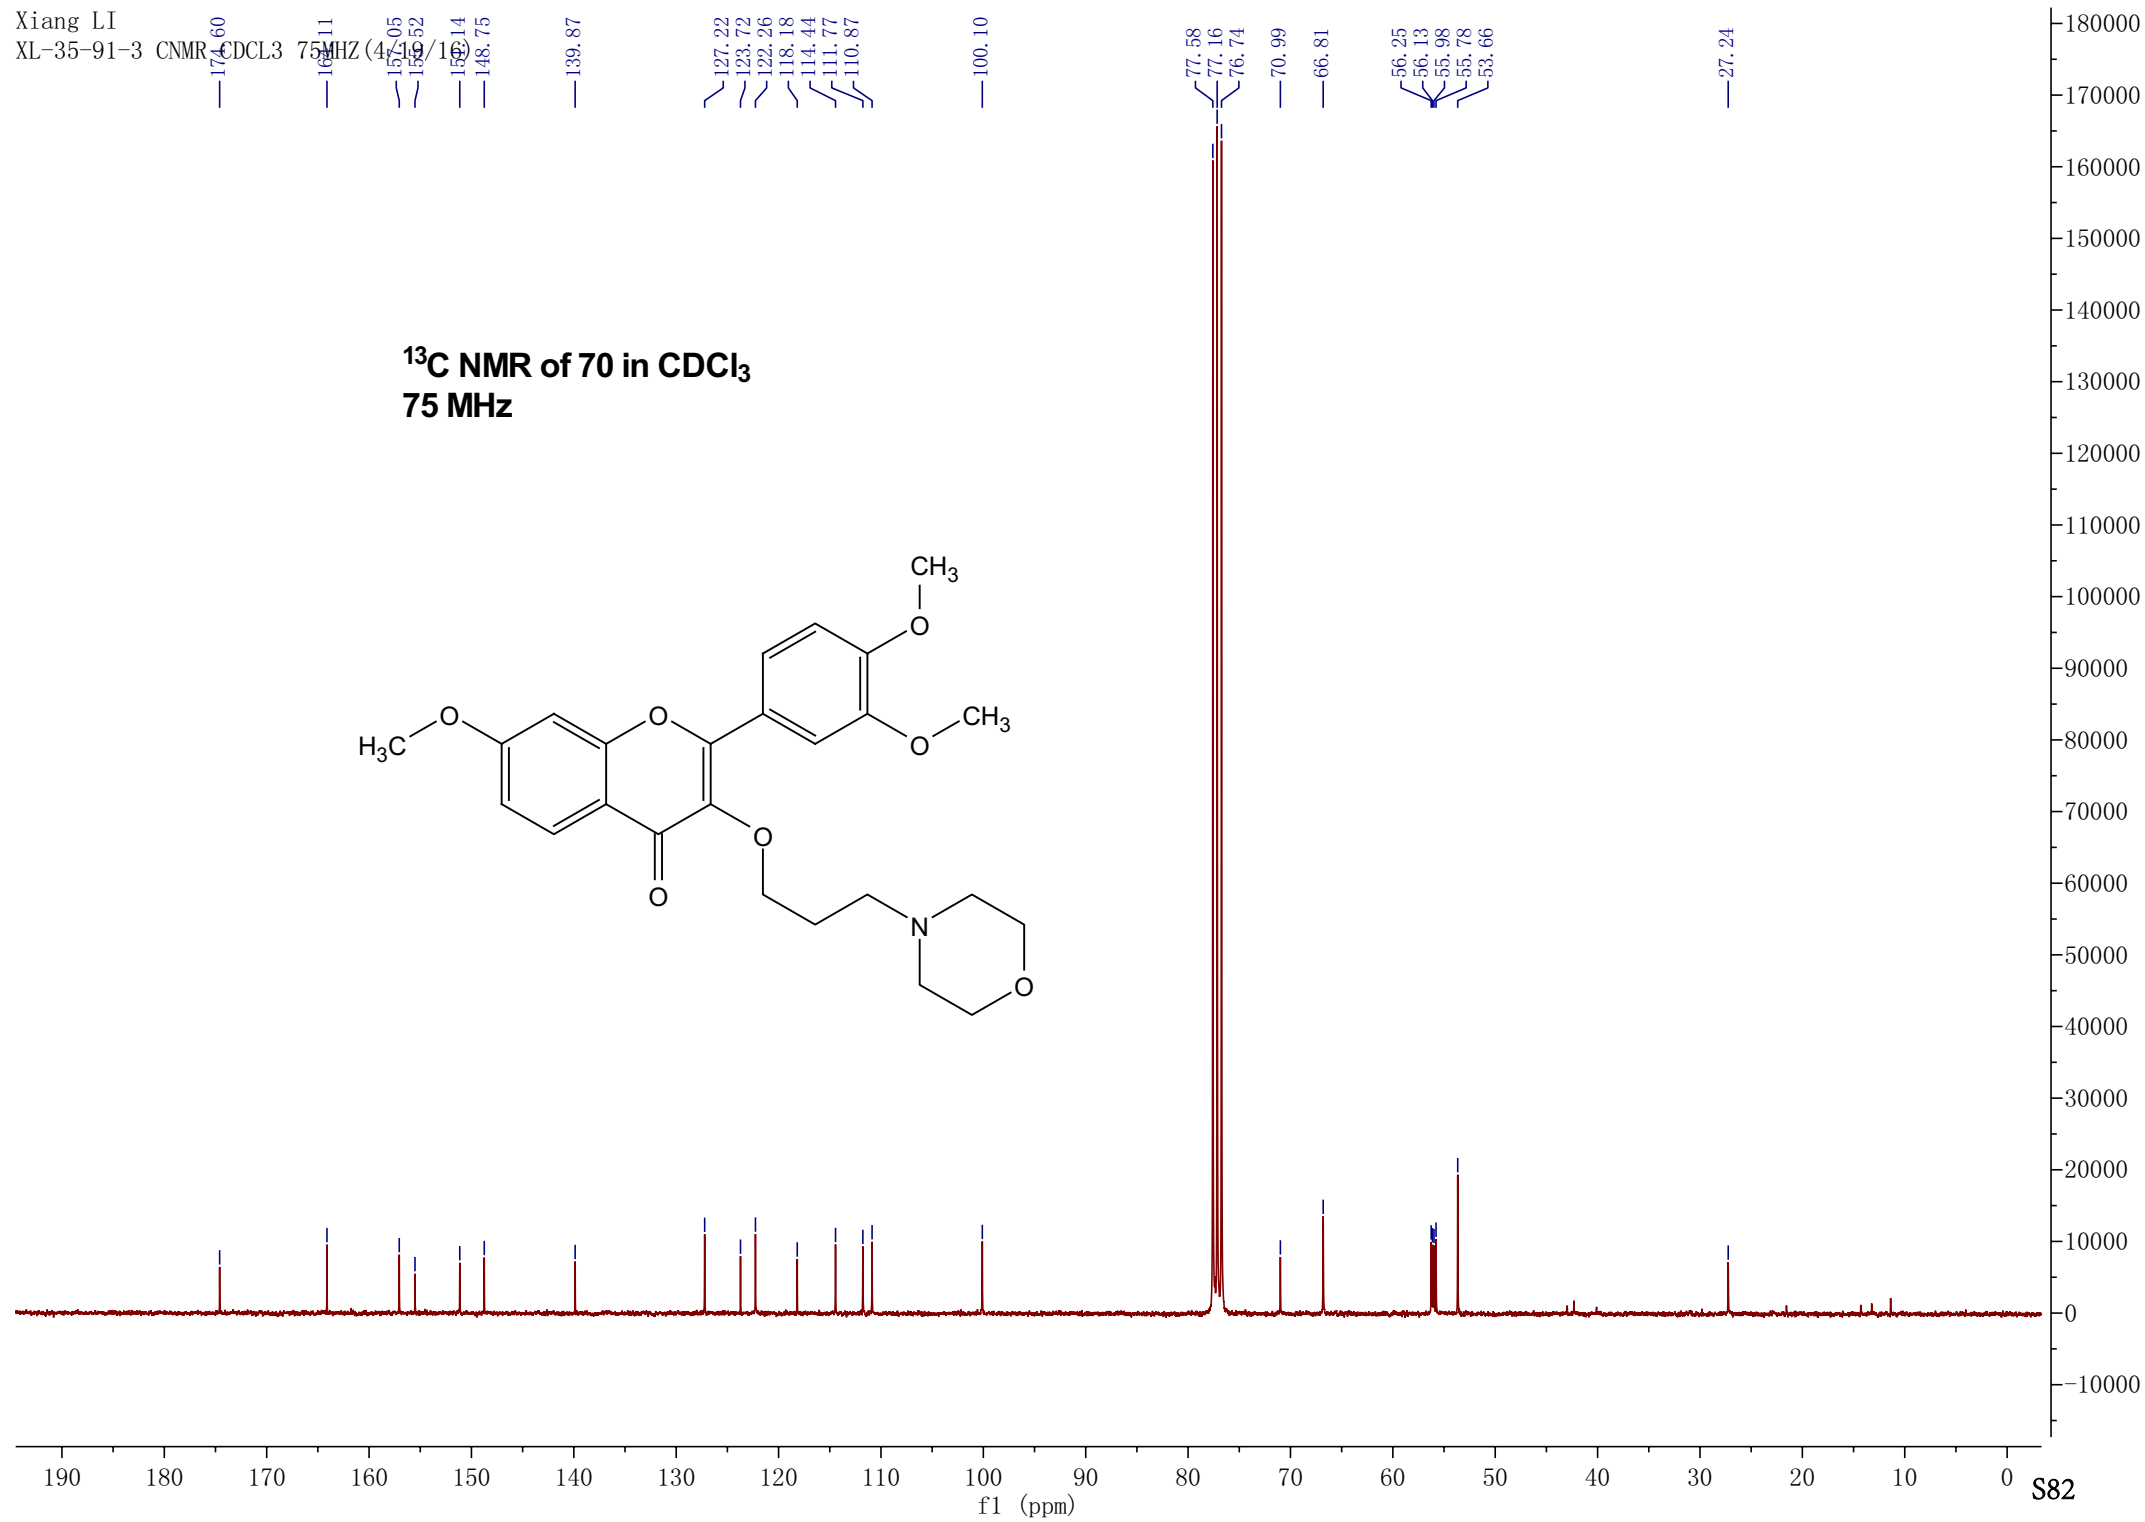

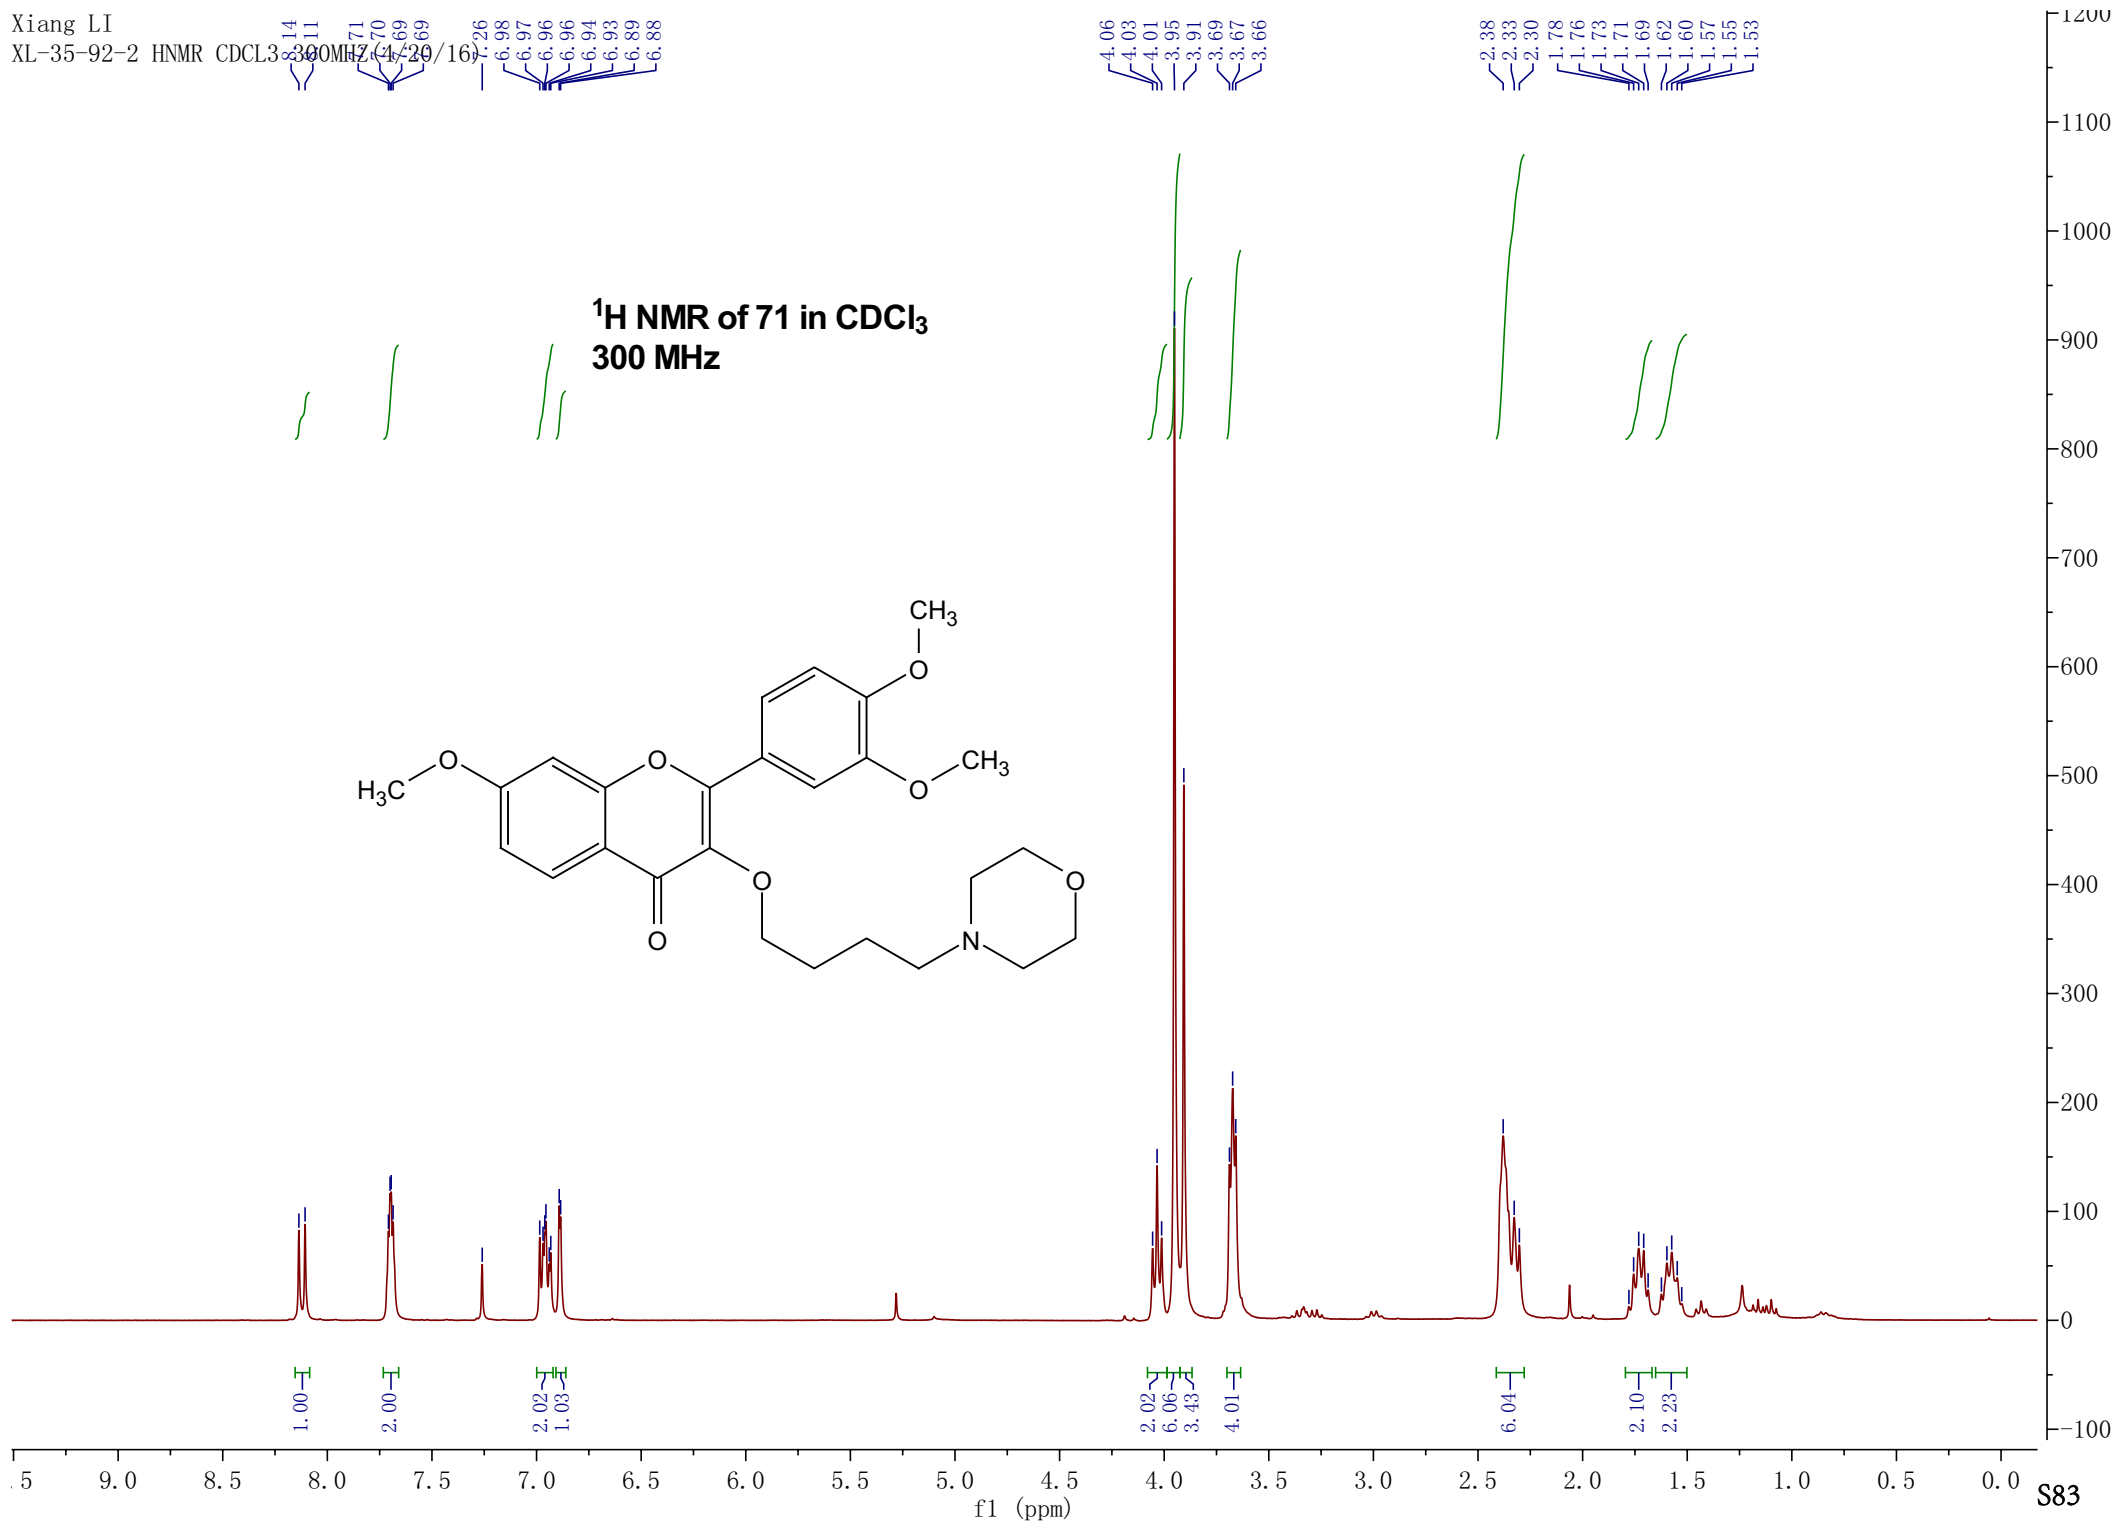

Xiang LI

XL-35-92-3 CNMR: CDCL<sub>3</sub>

75 MHz (450/150)

**<sup>13</sup>C NMR of 71 in CDCl<sub>3</sub>**  
**75 MHz**

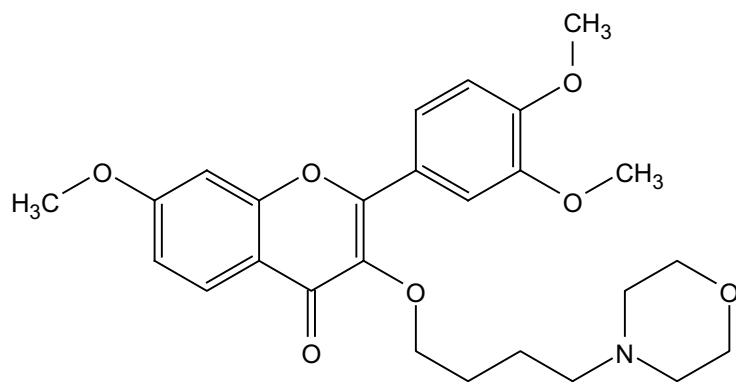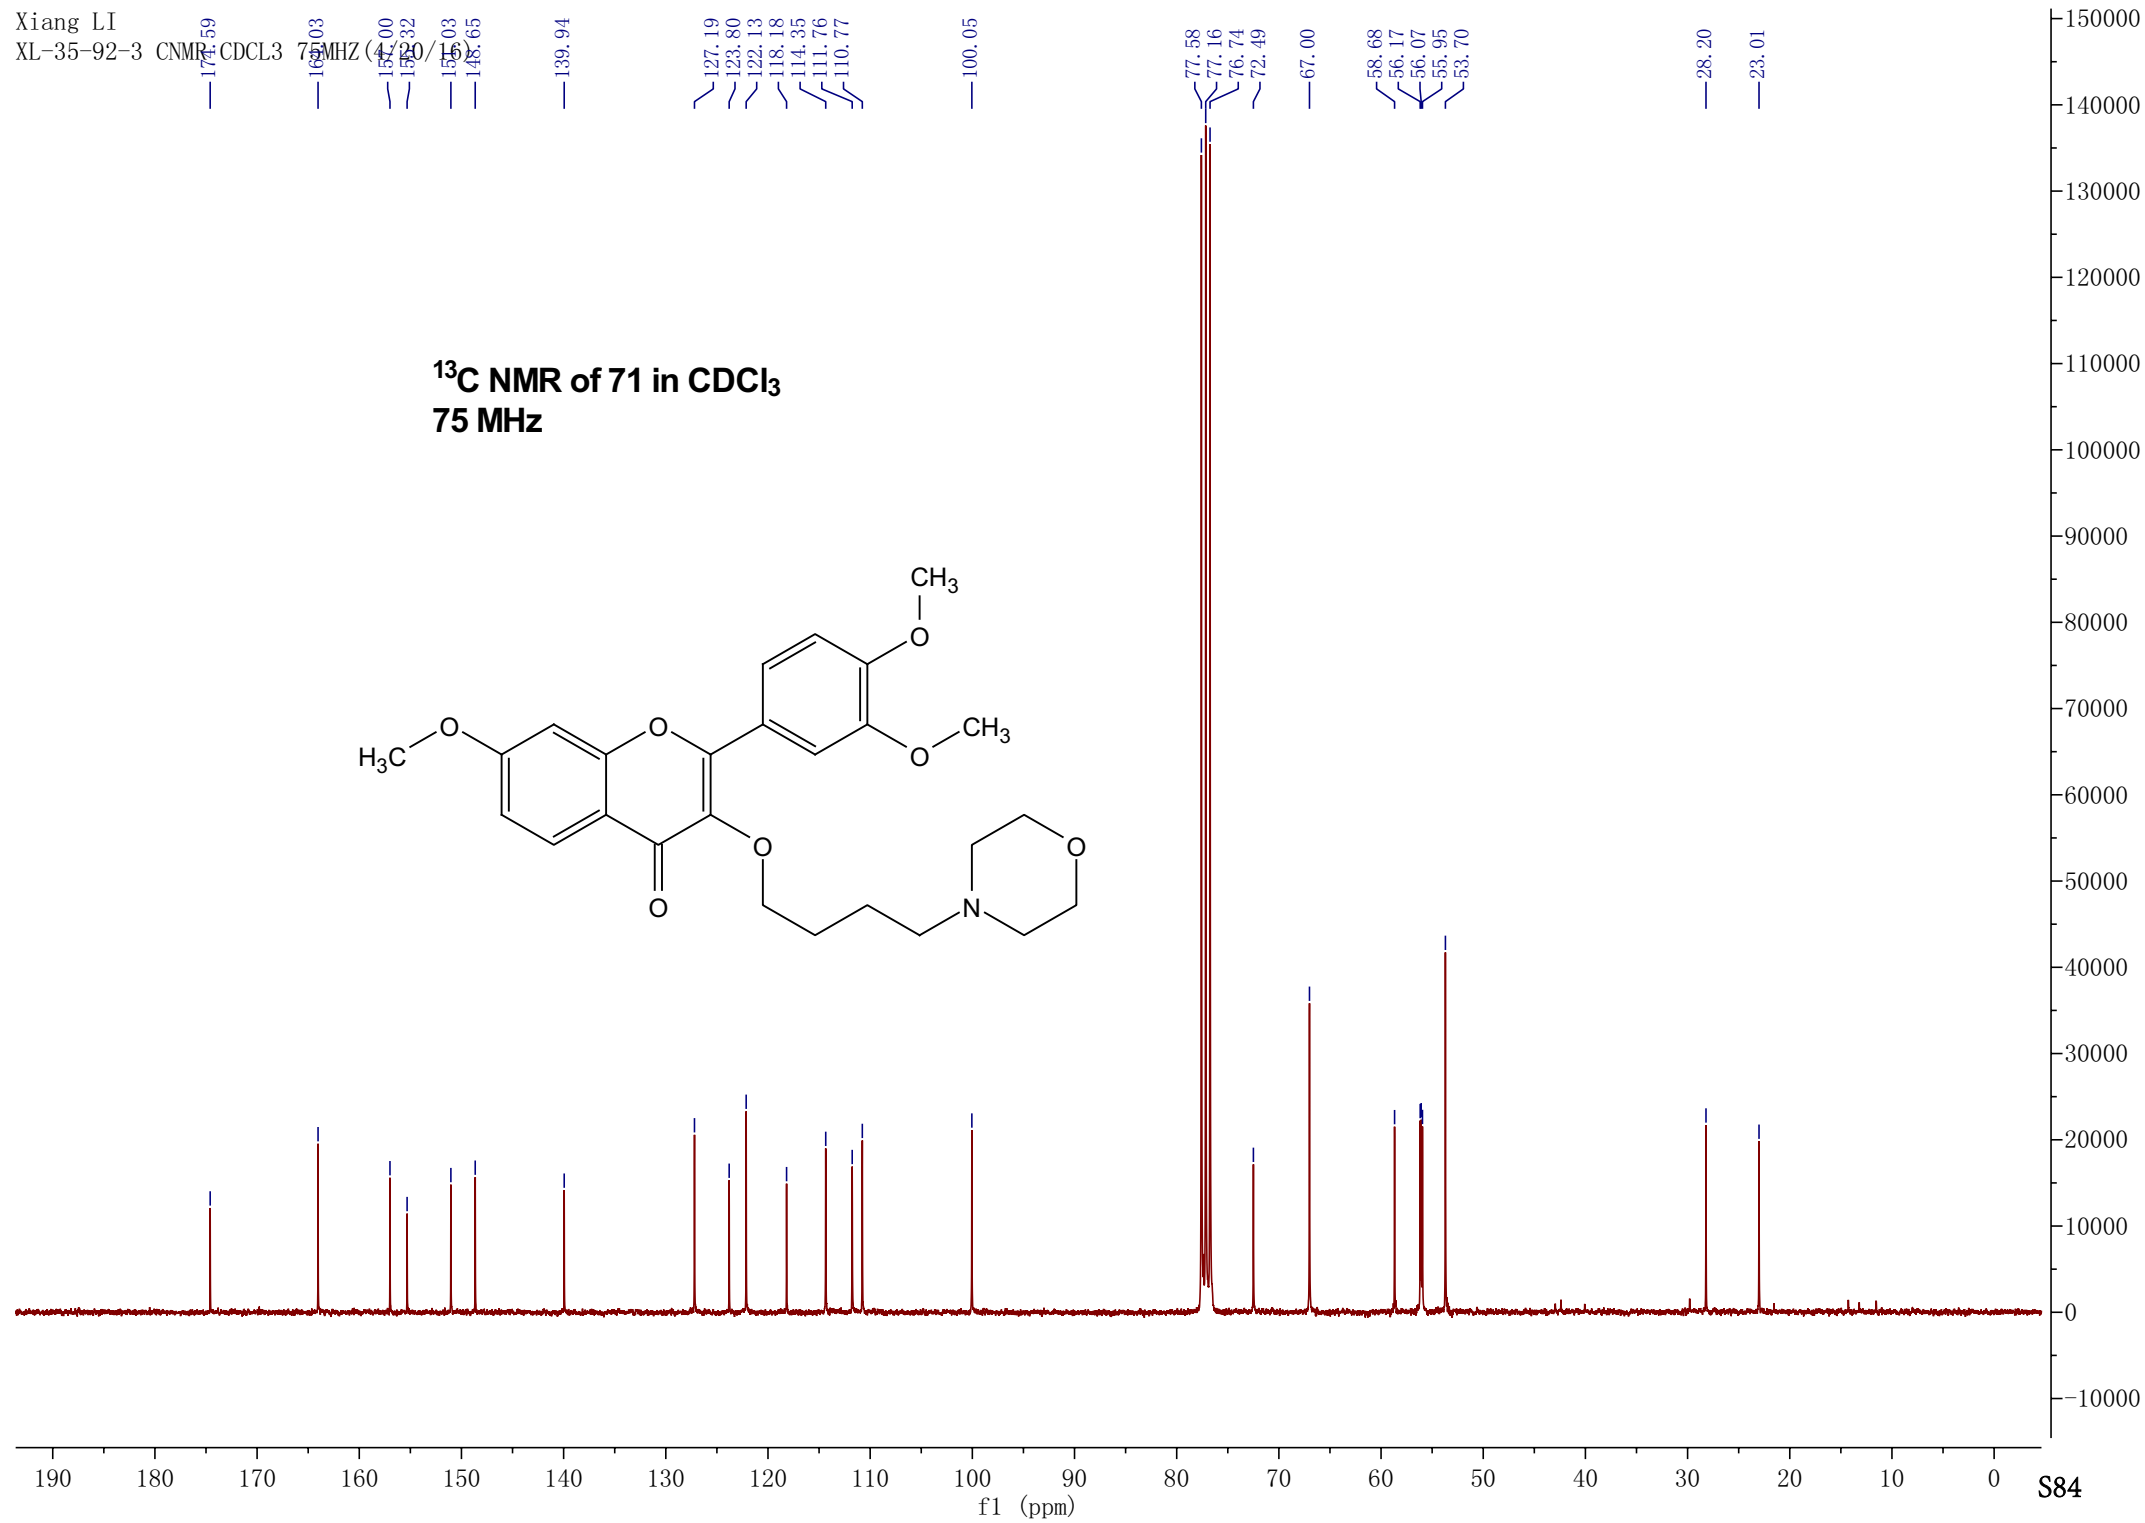



8.339  
8.009  
7.112  
7.086  
7.260  
6.987  
6.969  
6.962  
6.940  
6.933  
6.894  
6.887

4.030  
4.008  
3.985  
3.956  
3.951  
3.908  
3.706  
3.691  
3.676

2.403  
2.301  
2.278  
2.252  
1.779  
1.756  
1.732  
1.709  
1.687  
1.526  
1.478  
1.452  
1.431  
1.407  
1.385

**<sup>1</sup>H NMR of 72 in CDCl<sub>3</sub>  
300 MHz**

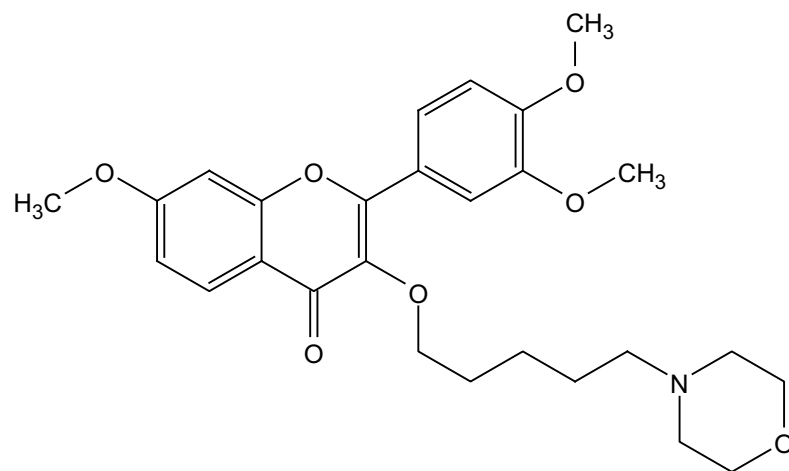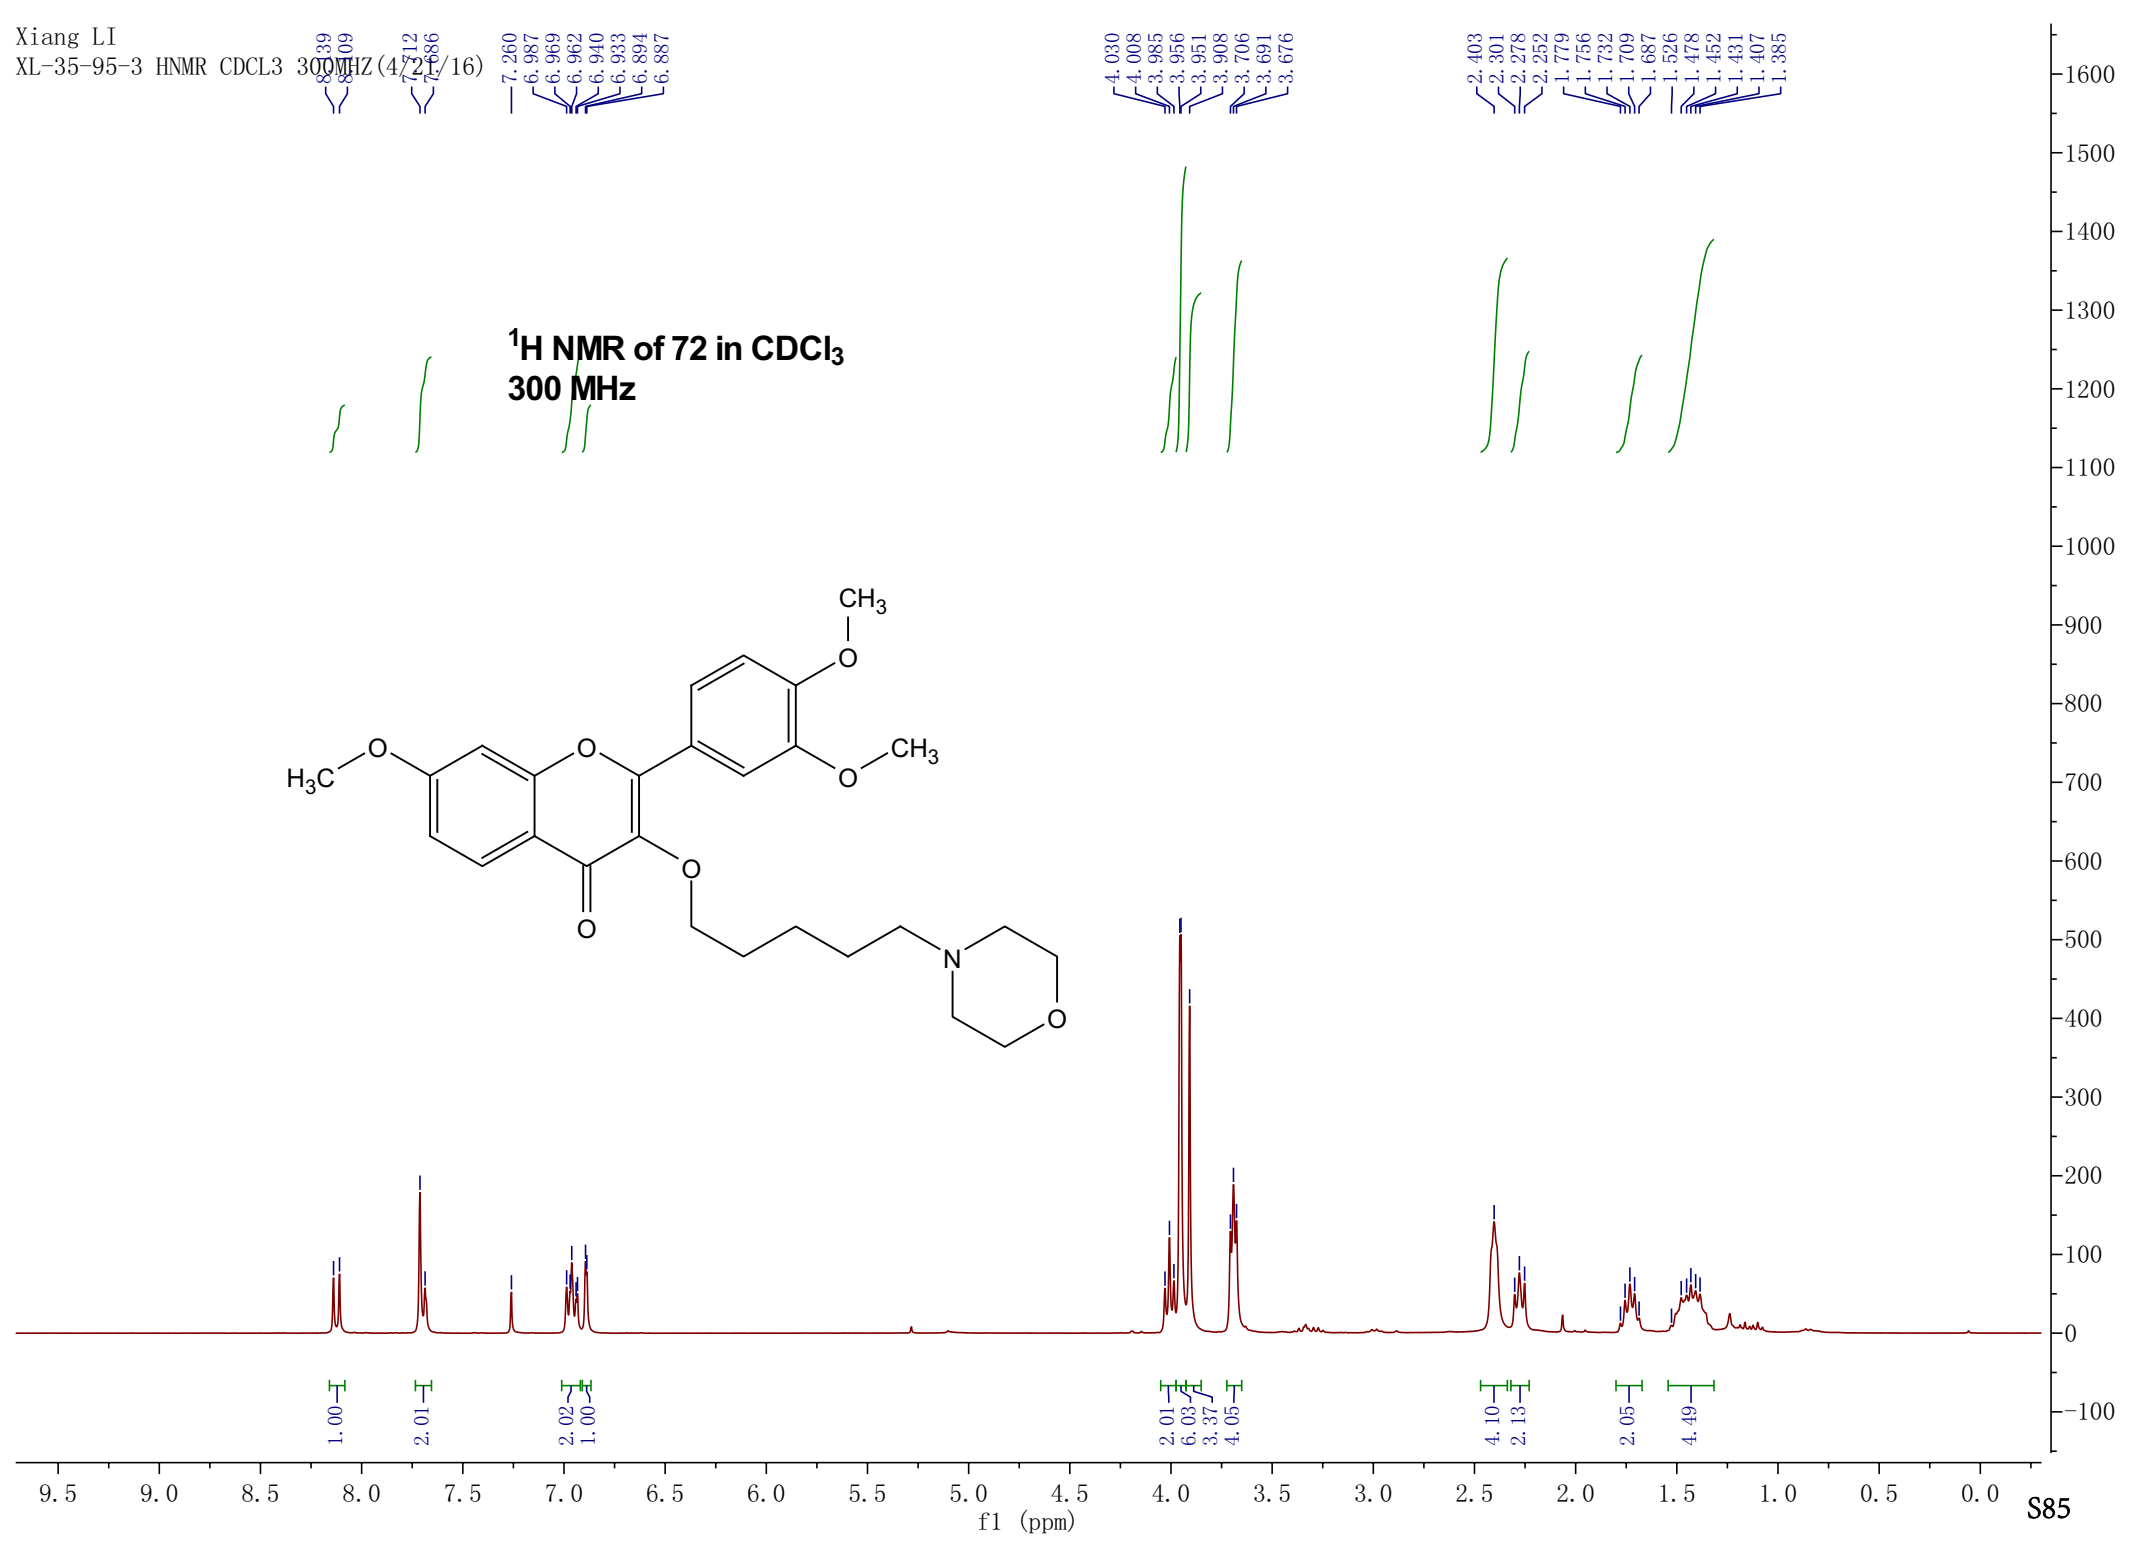

Xiang LI

XL-35-95-3 CNMR CDCl<sub>3</sub> 75MHz (4/21/16)

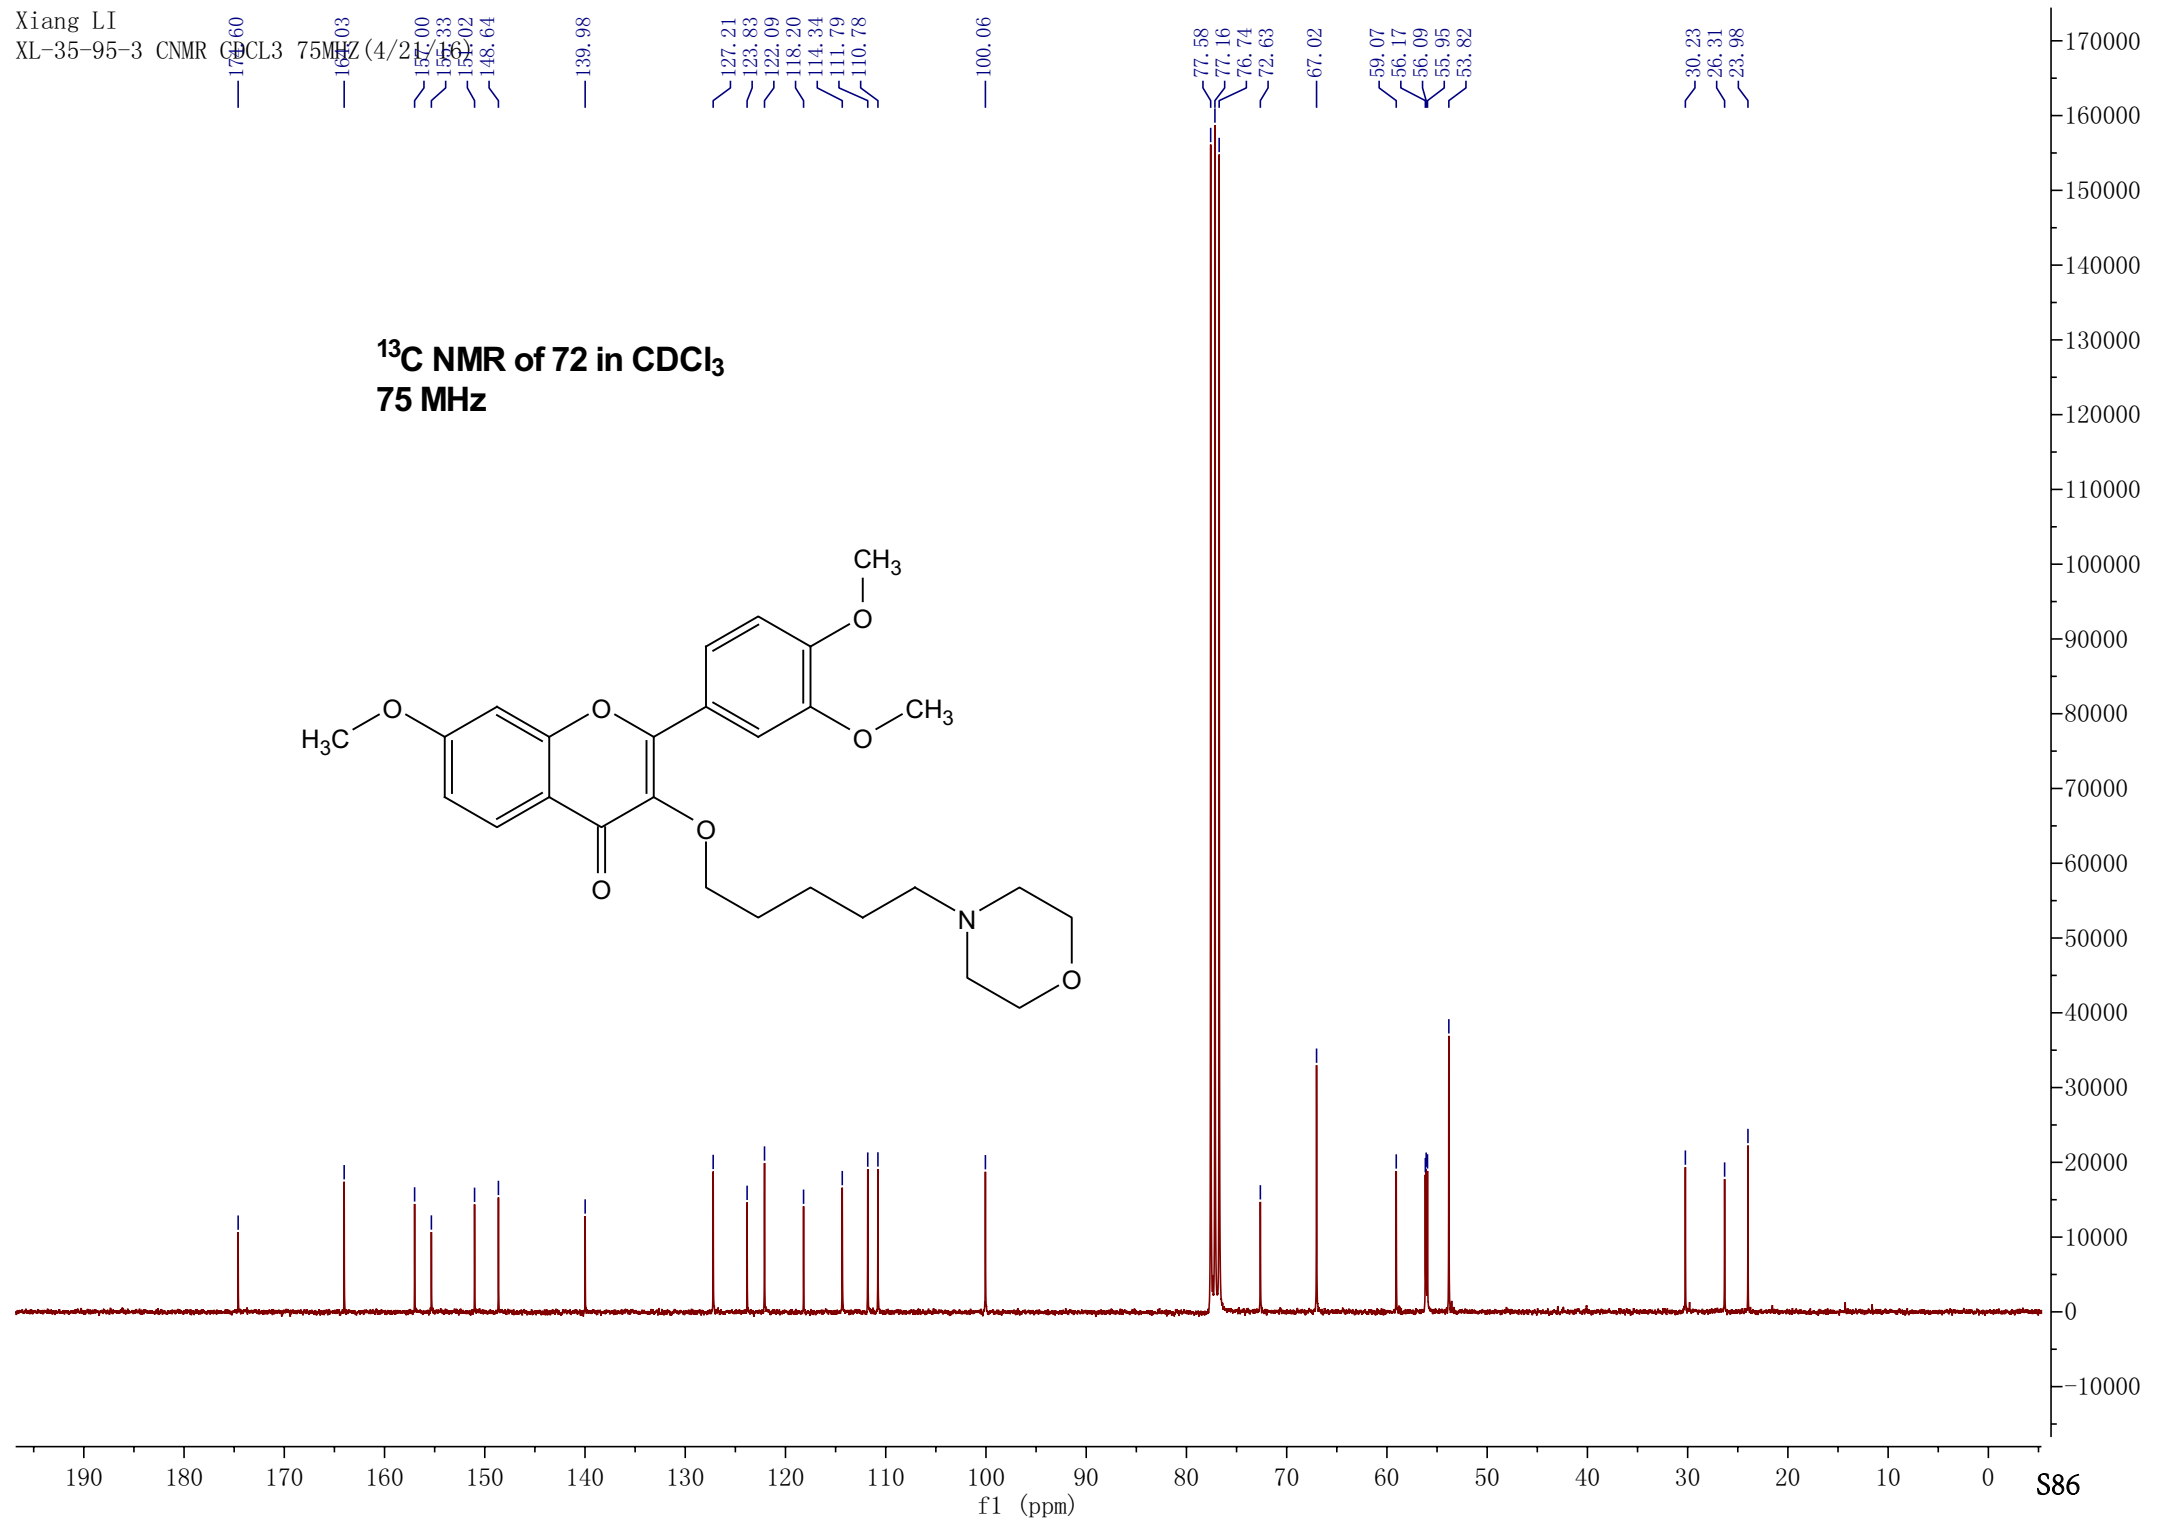

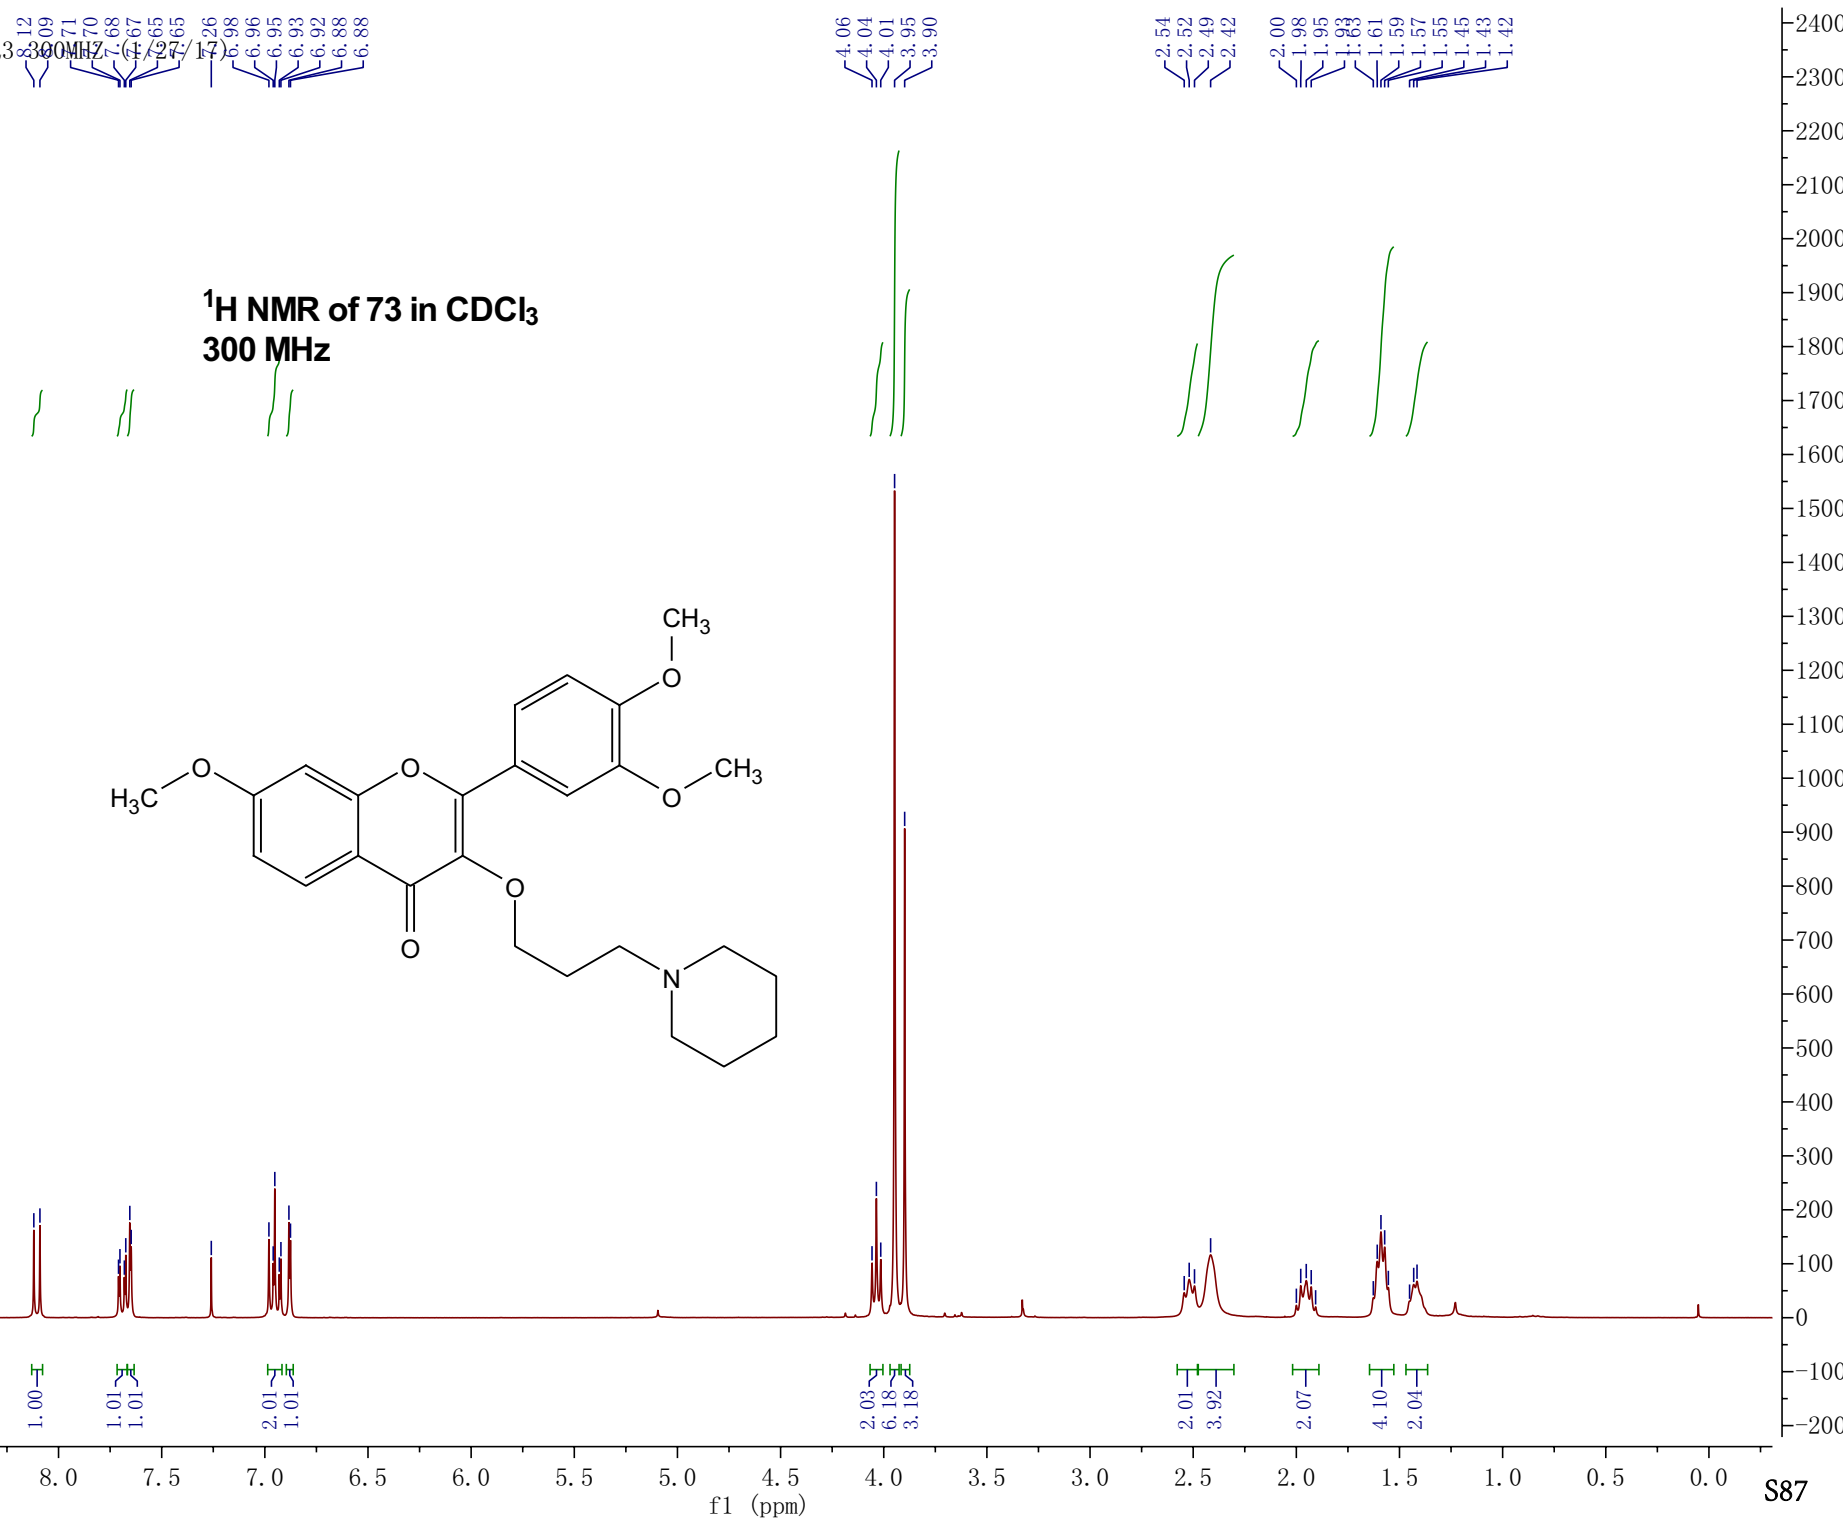

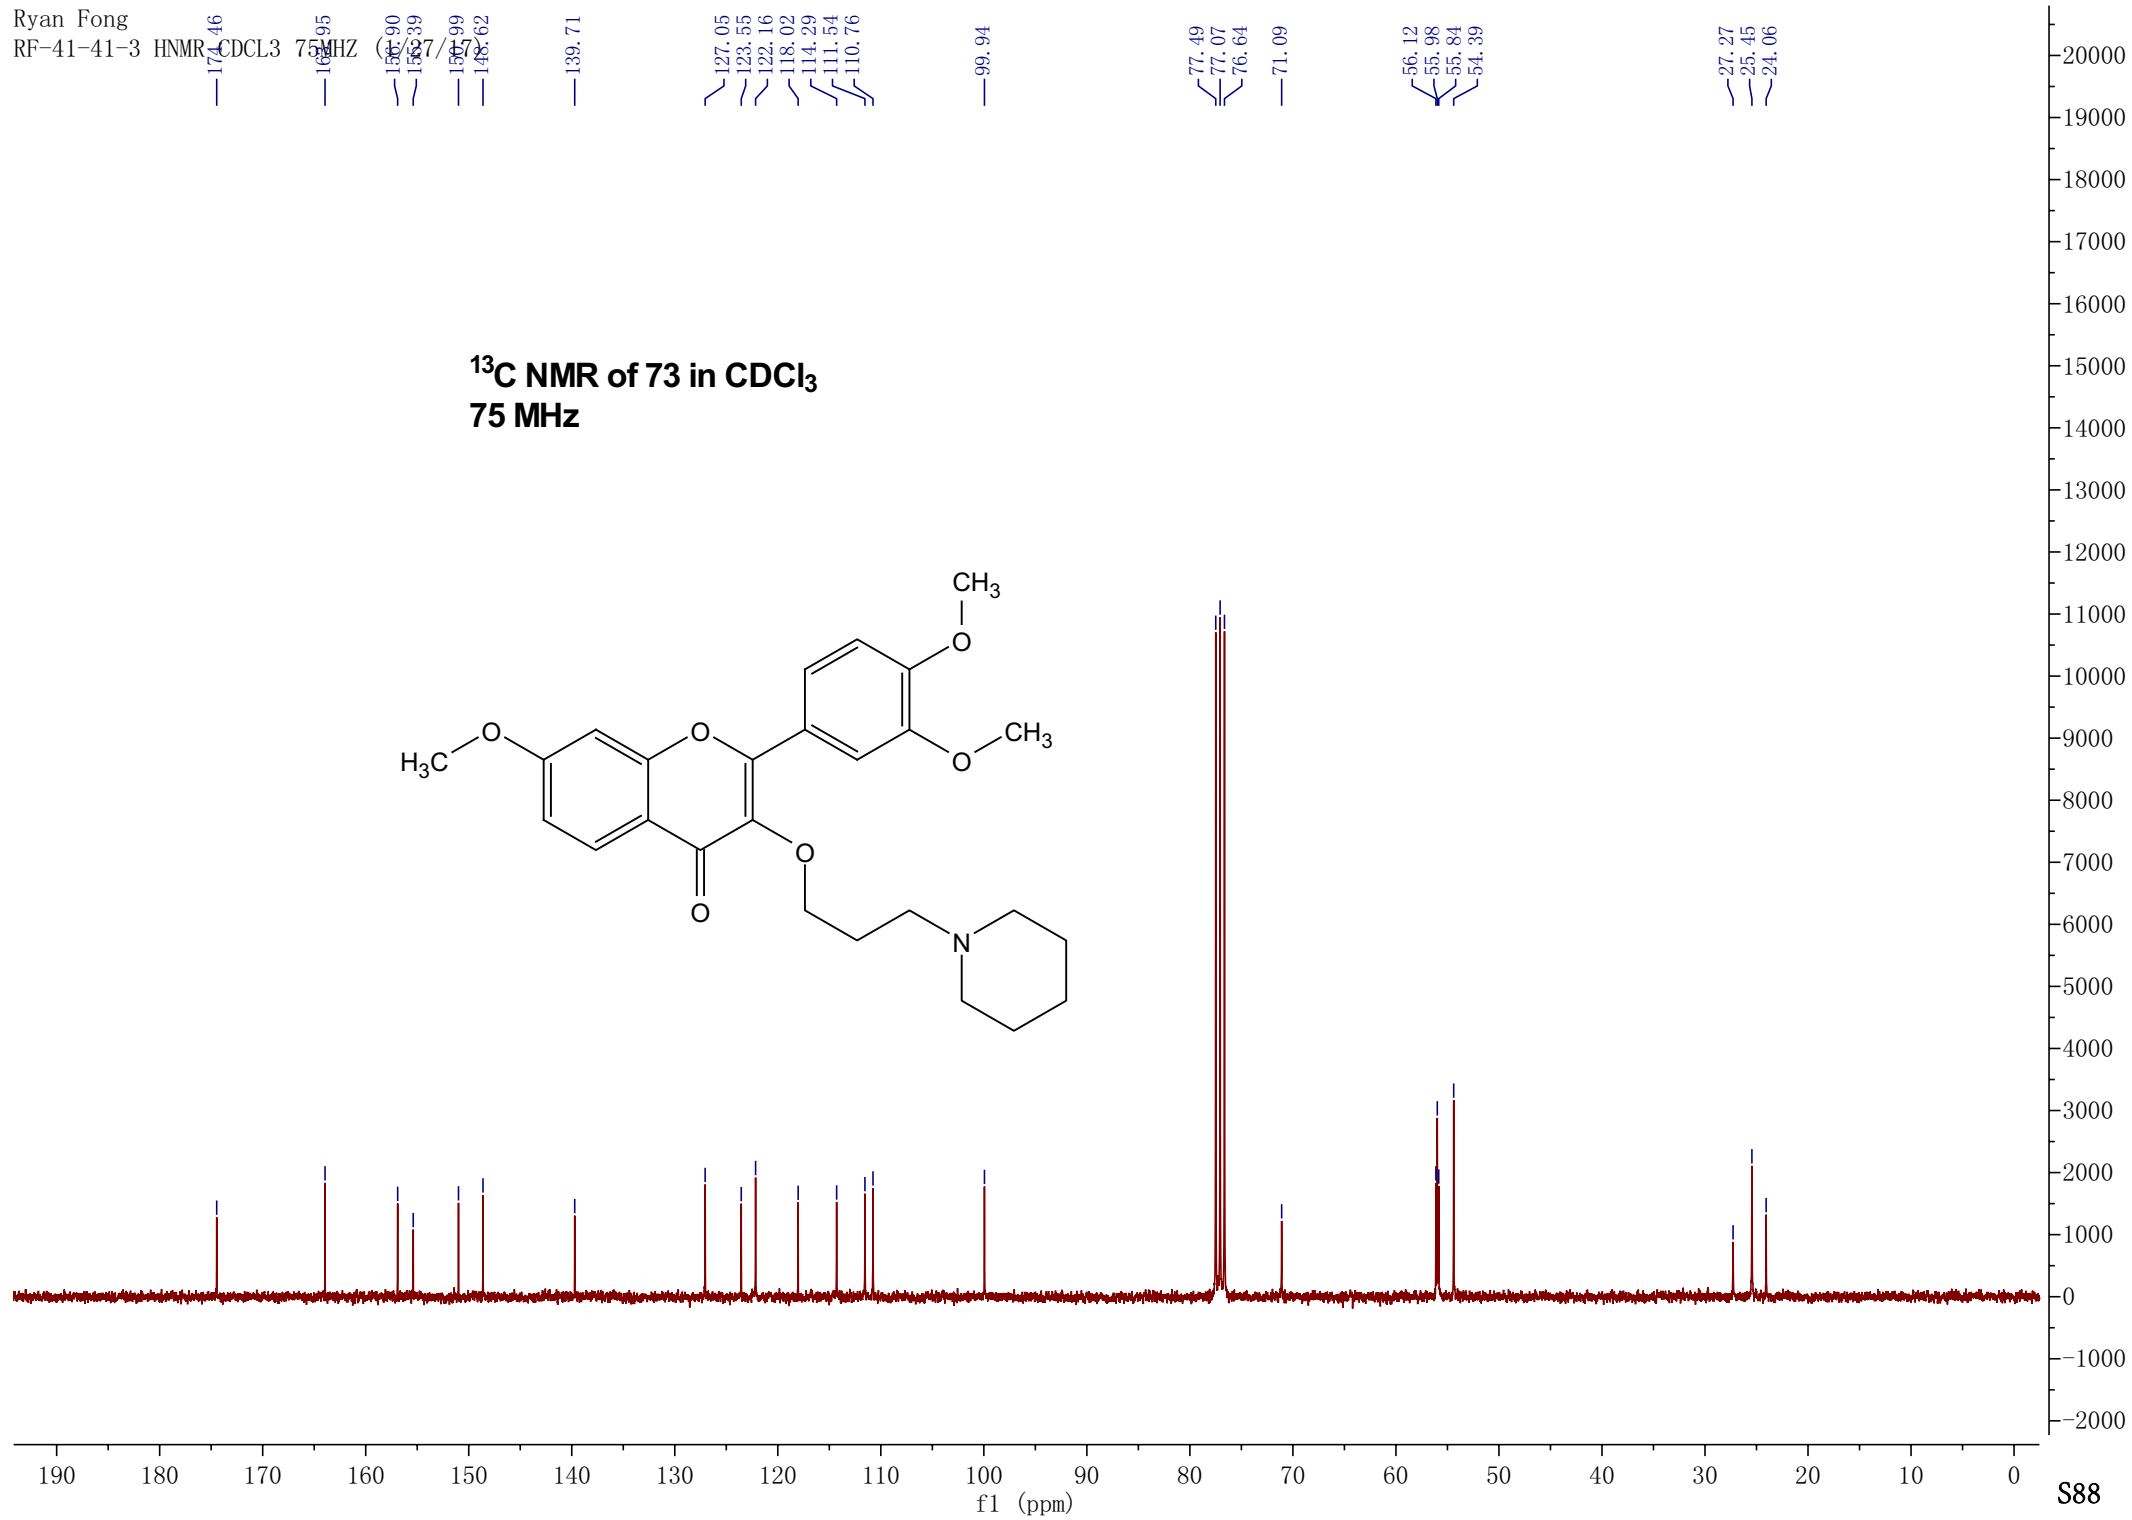

8.128  
8.098  
7.717  
7.710  
7.686  
7.23/1.6260  
6.981  
6.957  
6.950  
6.928  
6.920  
6.883  
6.876

4.036  
4.015  
3.993  
3.945  
3.898

2.328  
2.302  
2.276  
1.751  
1.728  
1.704  
1.681  
1.660  
1.622  
1.595  
1.574  
1.556  
1.539  
1.521  
1.430  
1.411  
1.395

**<sup>1</sup>H NMR of 74 in CDCl<sub>3</sub>  
300 MHz**

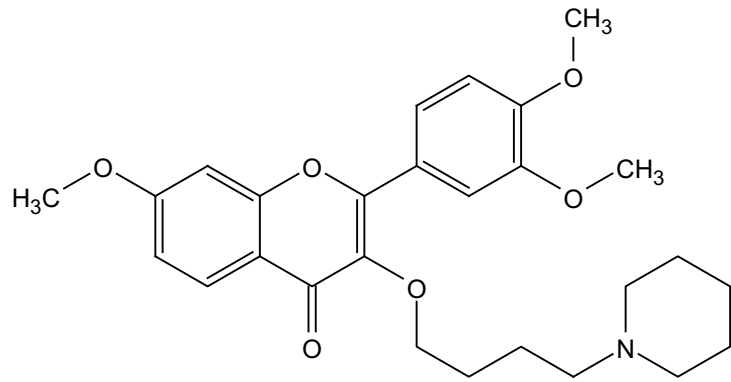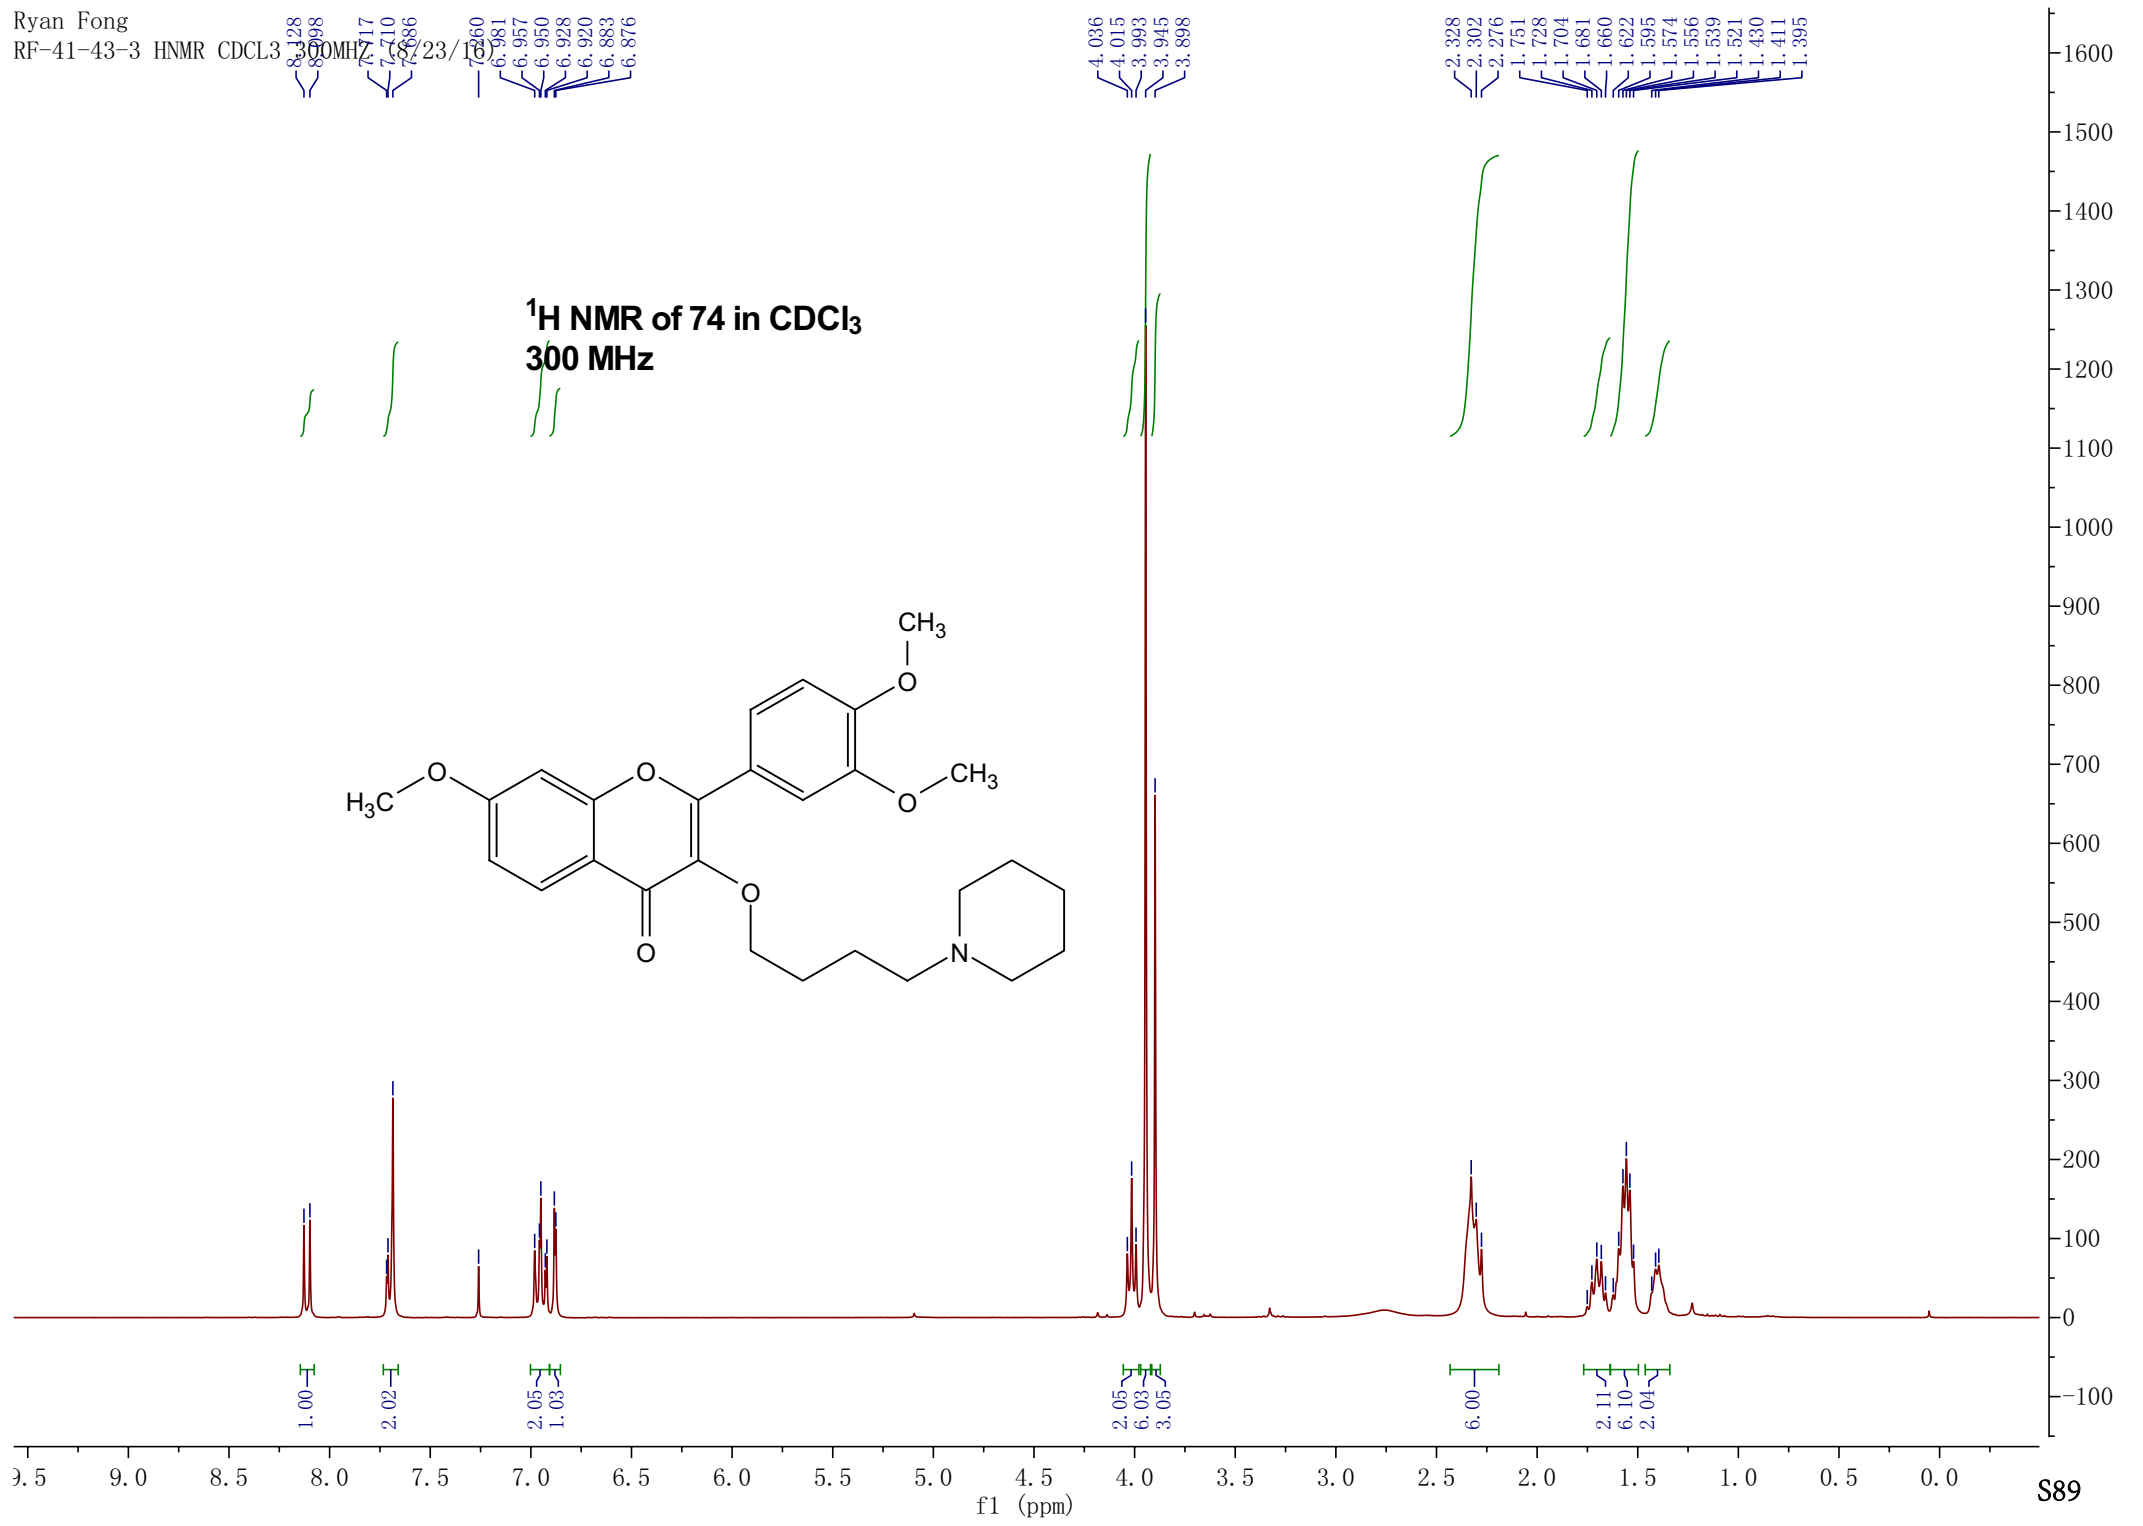

Ryan Fong

RF-41-43-3 CNMR CDCl<sub>3</sub> 75MHz

**<sup>13</sup>C NMR of 74 in CDCl<sub>3</sub>  
75 MHz**

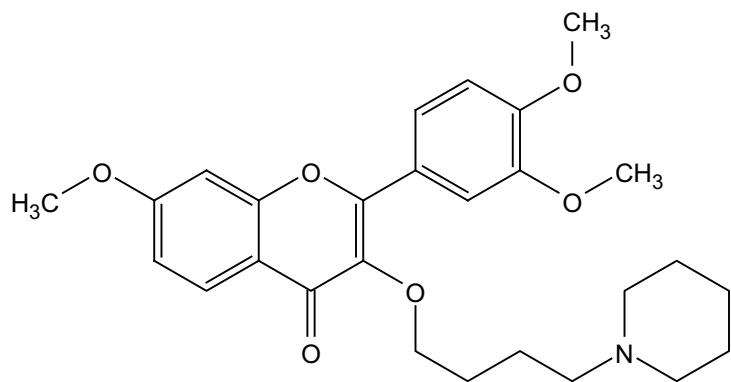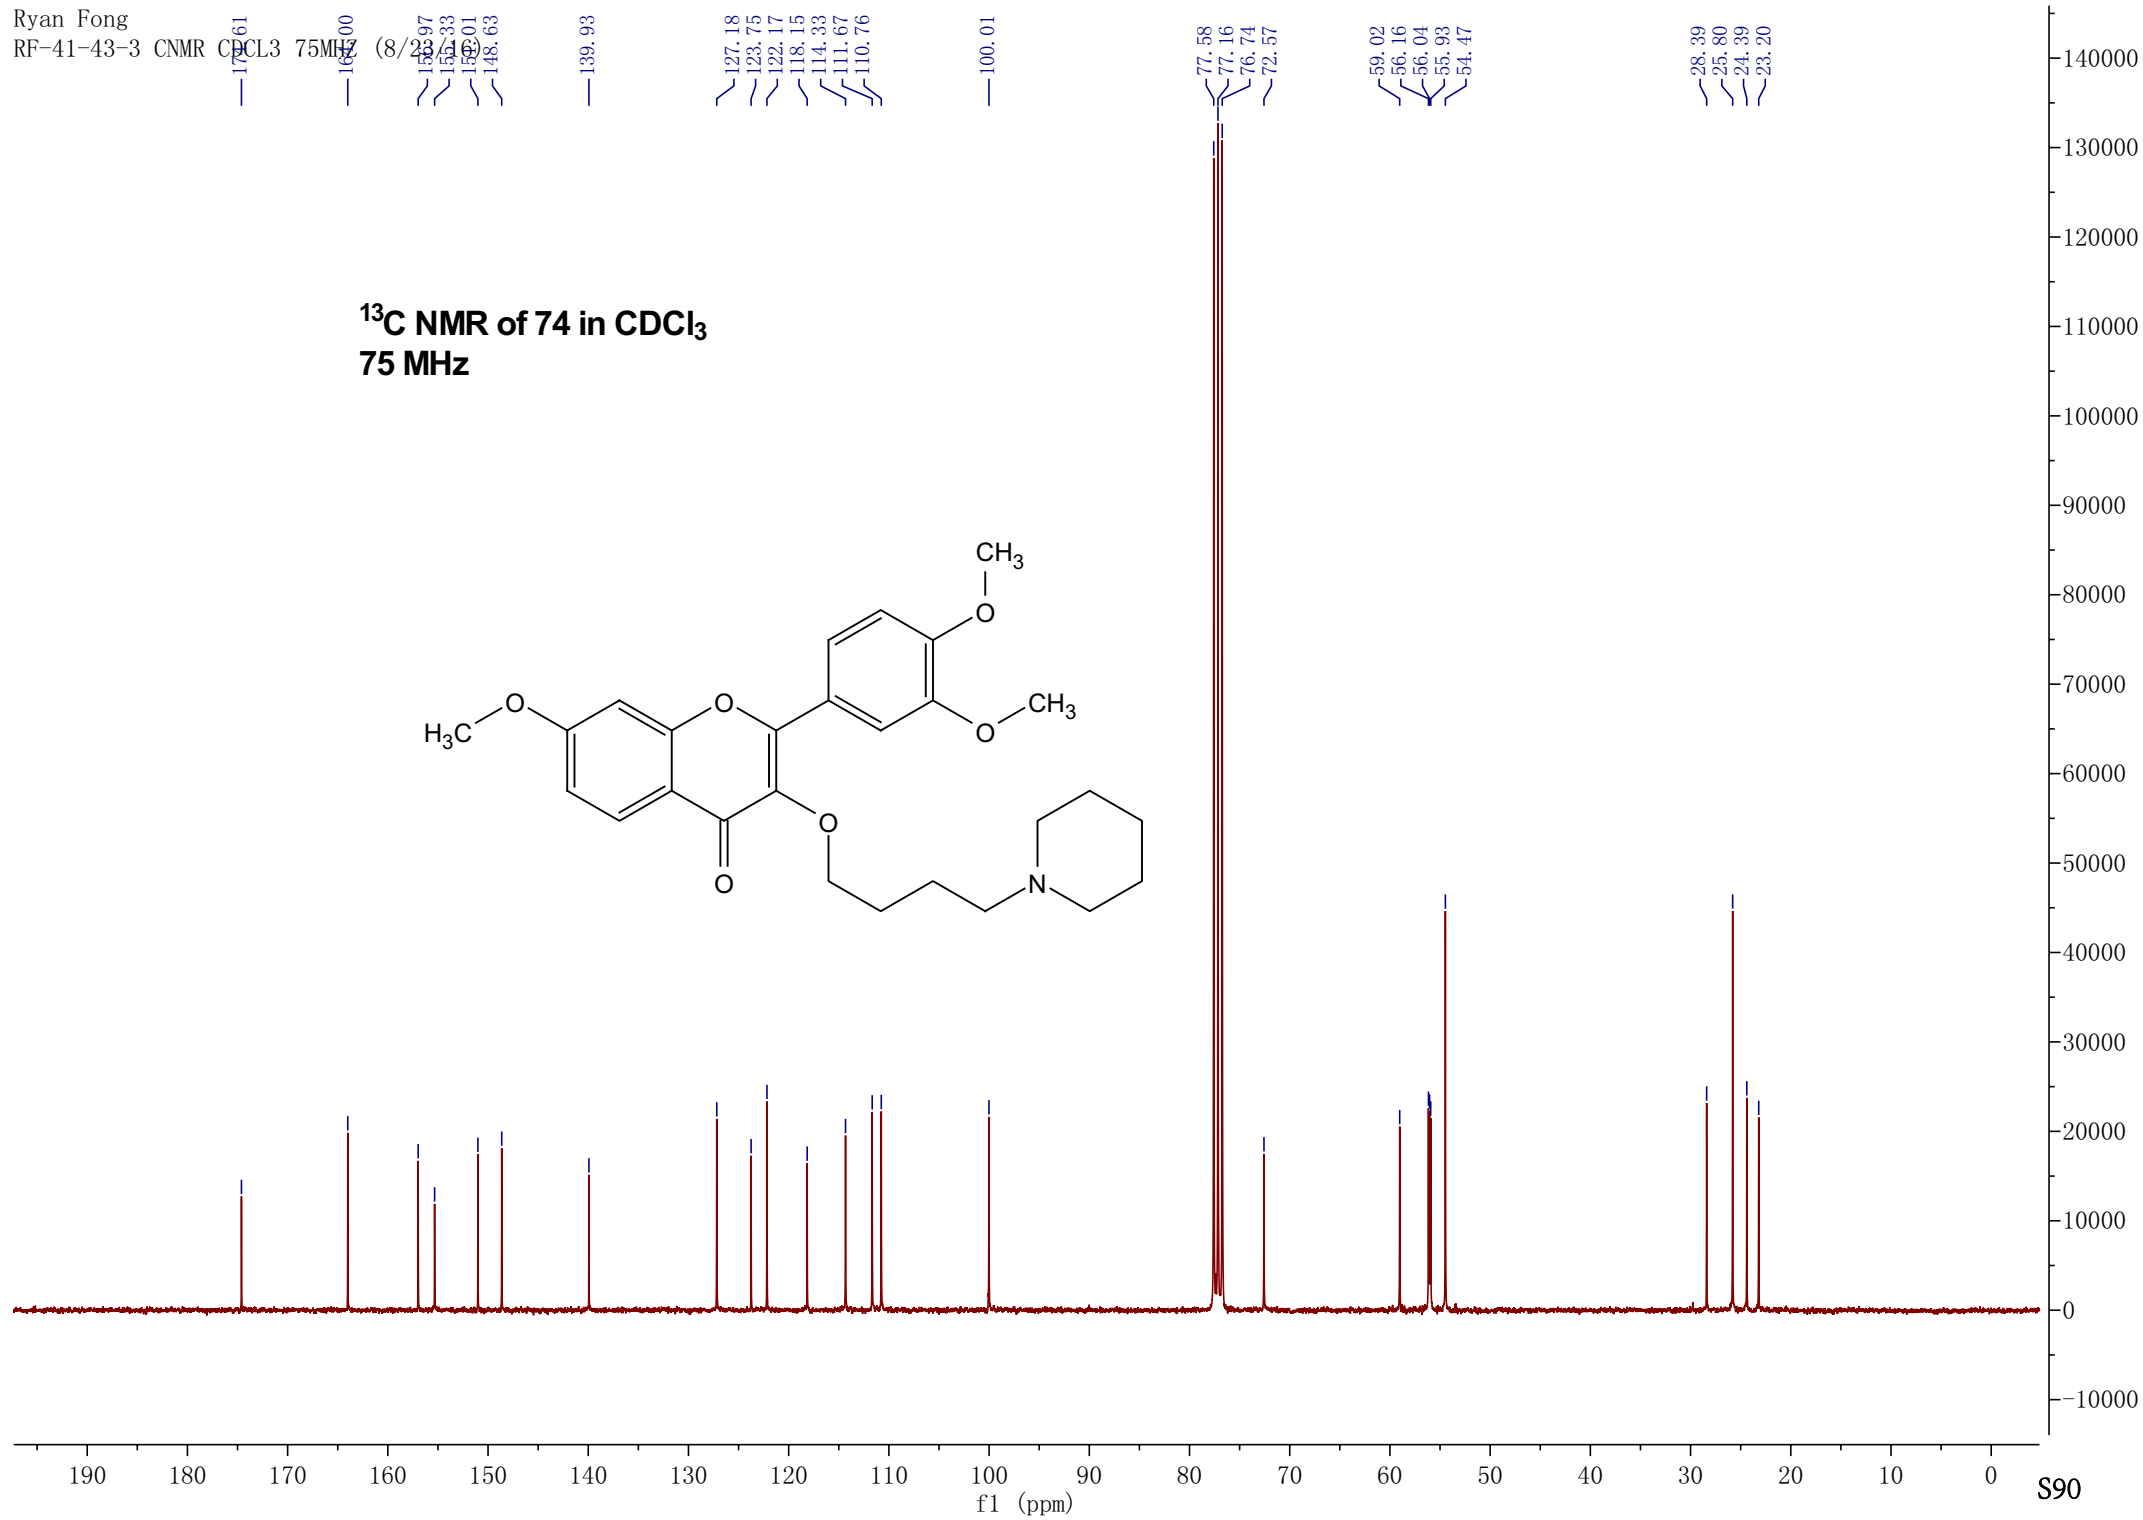

8.132  
8.003  
7.715  
7.709  
7.702  
7.695  
7.686  
7.679  
7.260  
6.988  
6.964  
6.957  
6.934  
6.927  
6.889  
6.882

4.018  
3.996  
3.974  
3.955  
3.947  
3.904

2.422  
2.334  
2.308  
2.281  
1.771  
1.749  
1.725  
1.700  
1.677  
1.648  
1.629  
1.611  
1.592  
1.574  
1.550  
1.522  
1.507  
1.497  
1.469  
1.441  
1.418  
1.398  
1.389  
1.366  
1.337  
1.319

**<sup>1</sup>H NMR of 75 in CDCl<sub>3</sub>  
300 MHz**

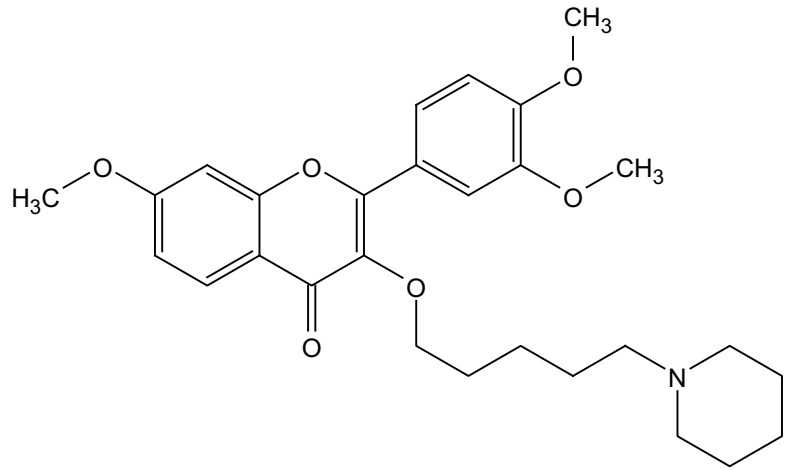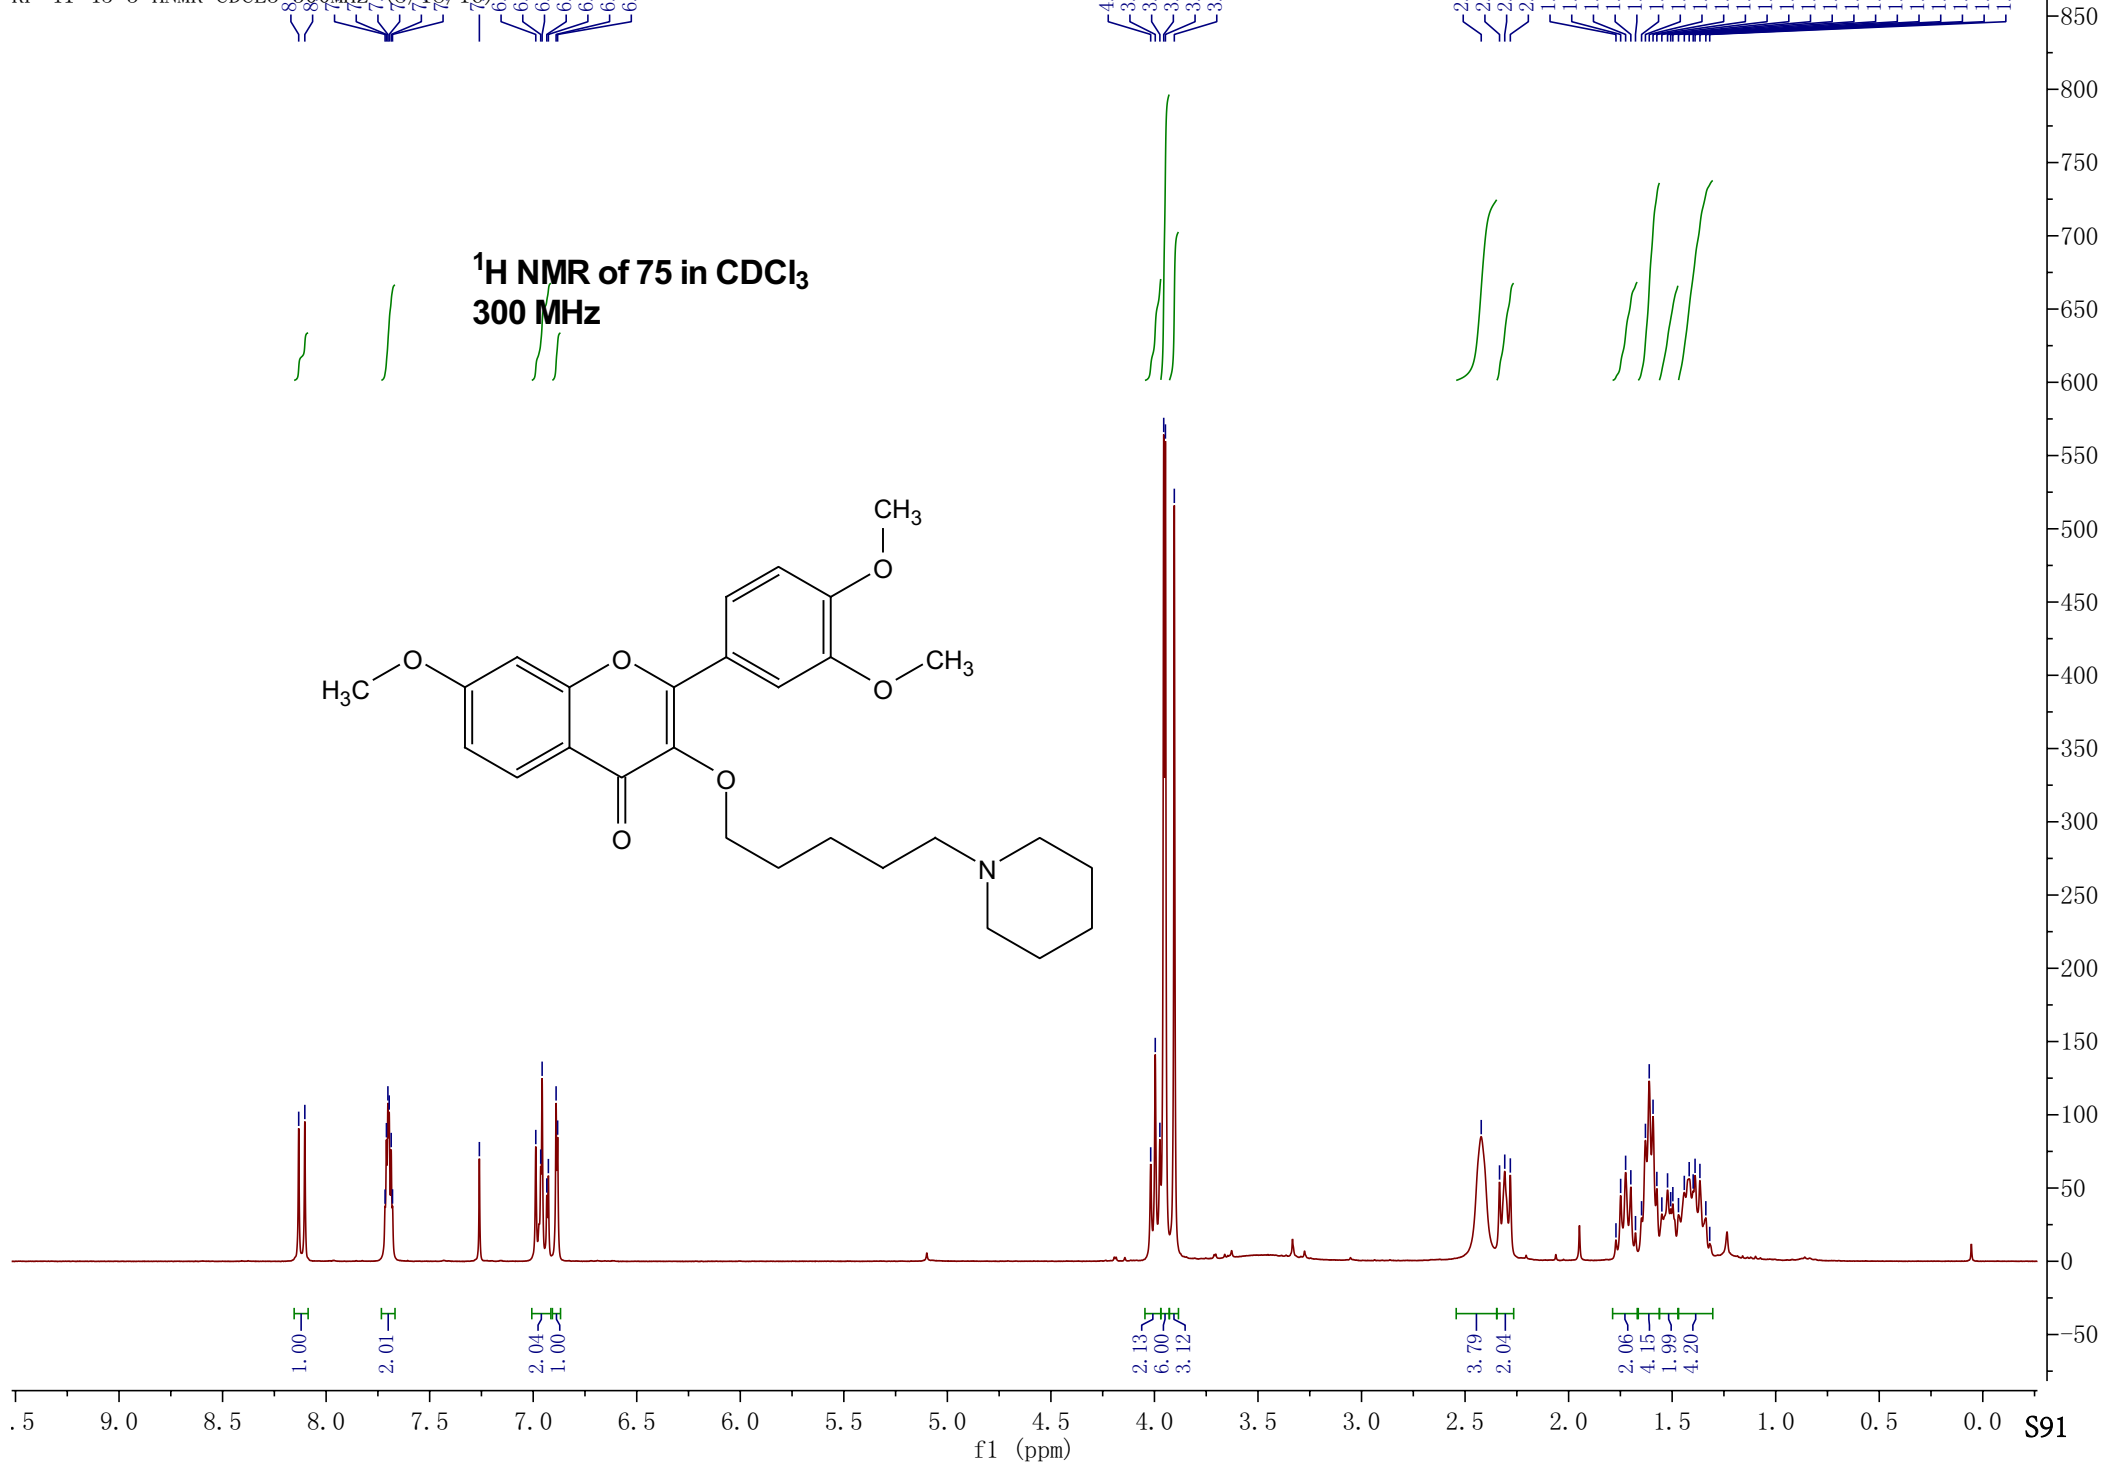

Ryan Fong

RF-41-45-3 CNMR CDCL3 75MHz

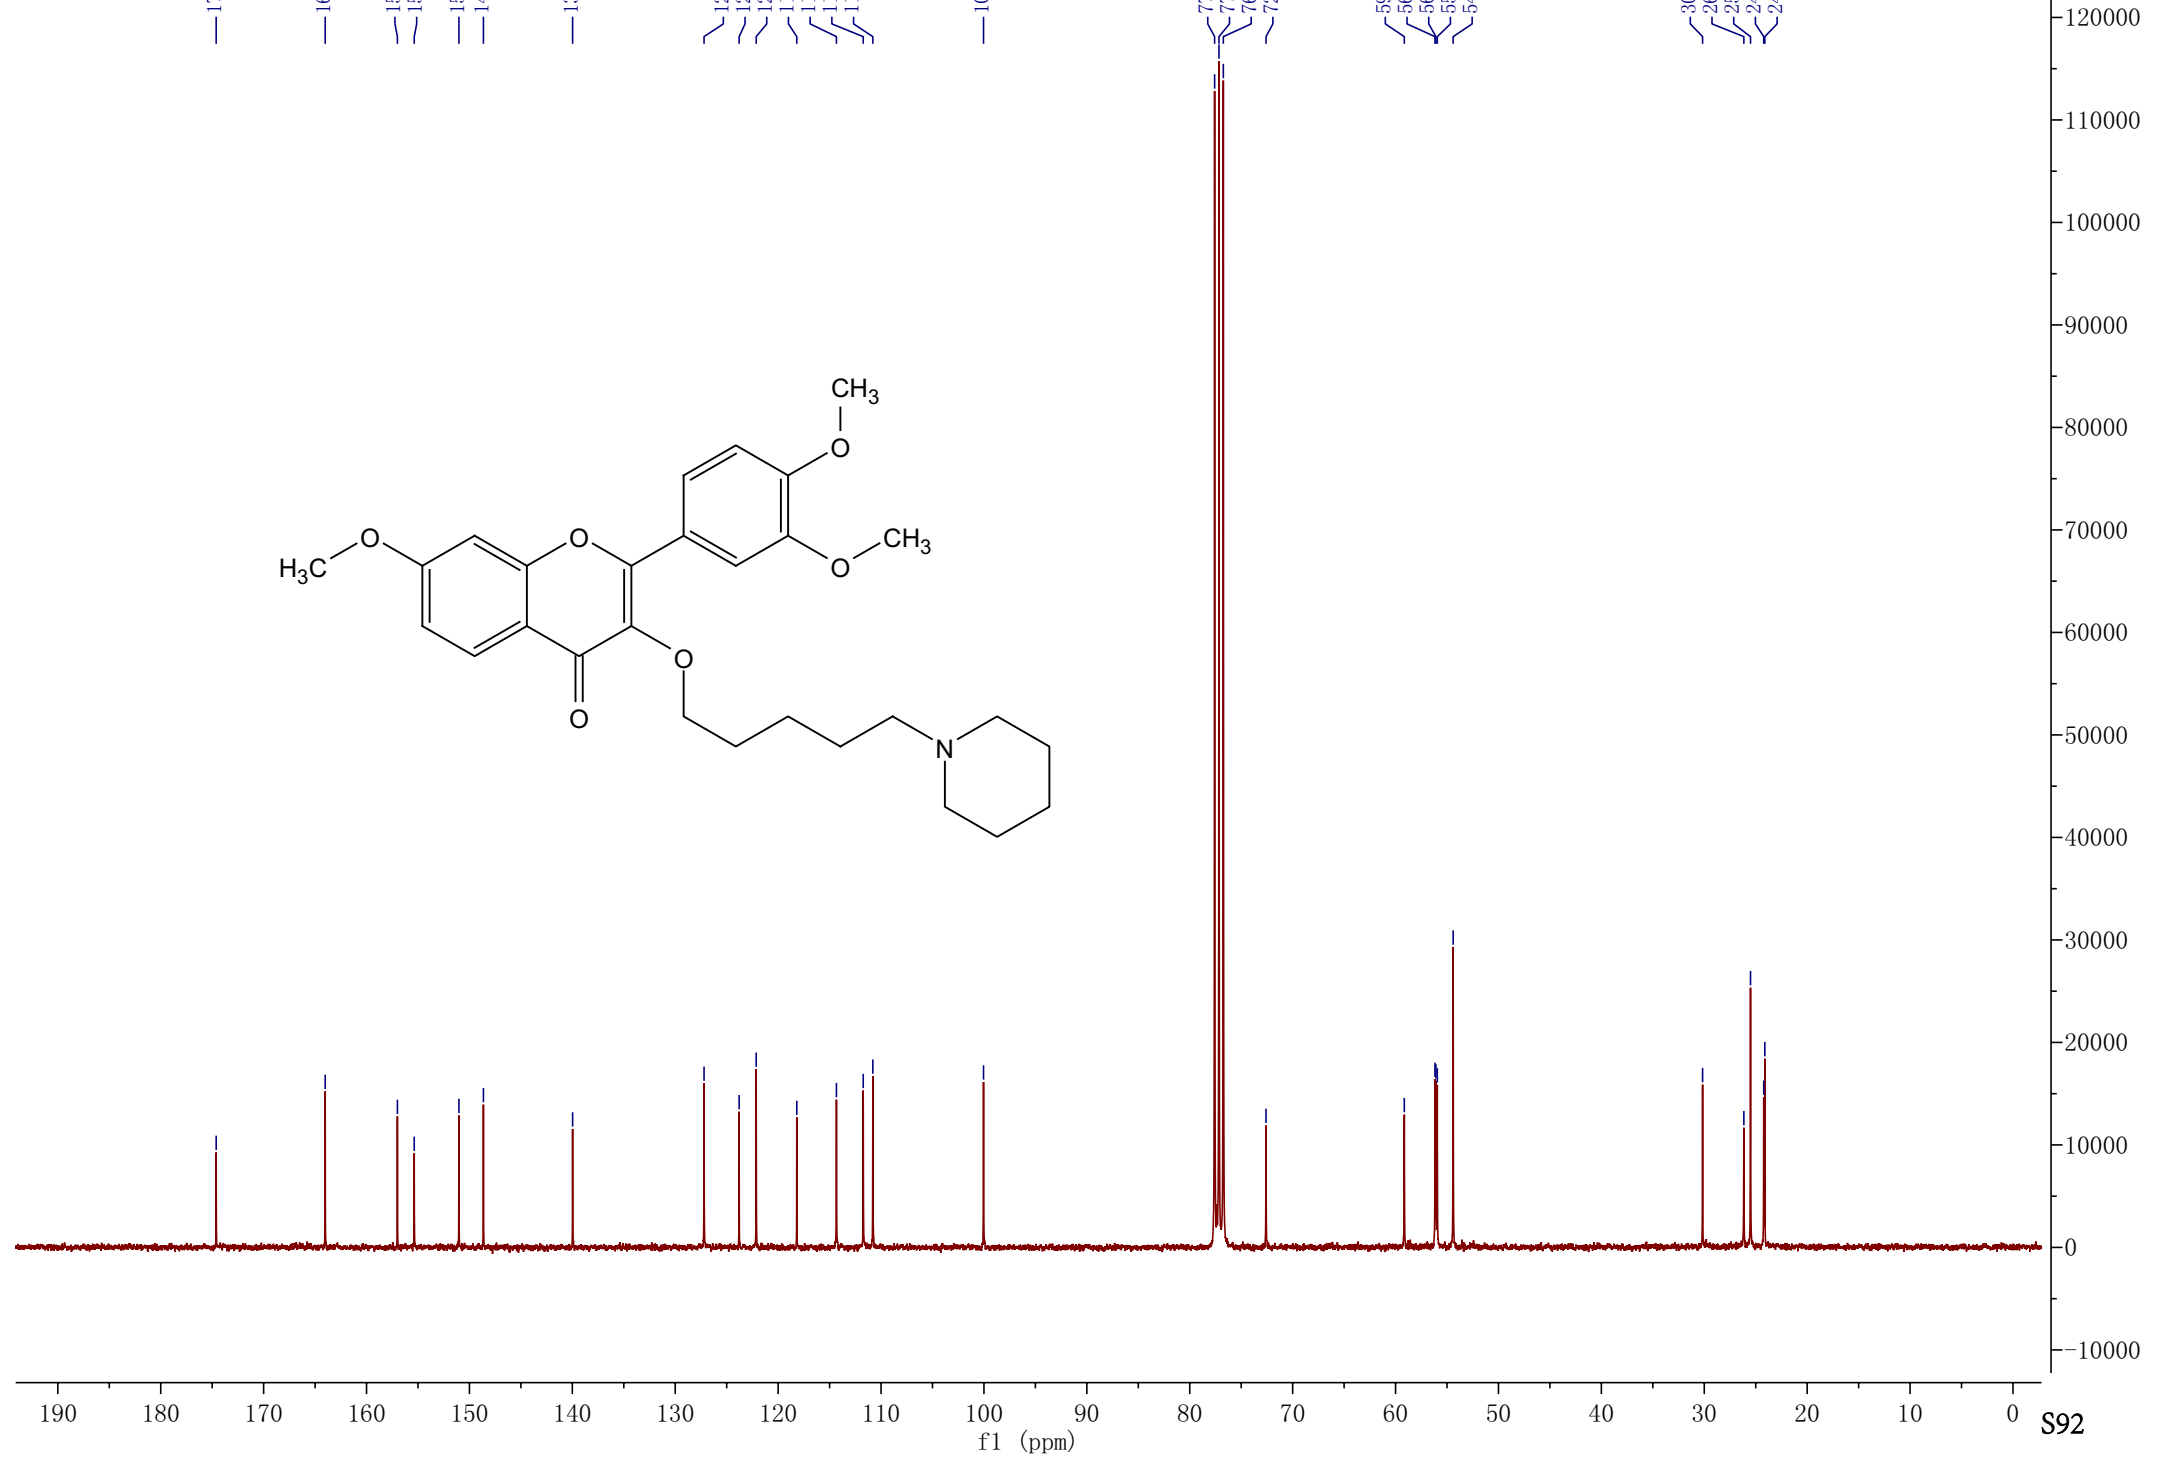



8.12  
8.09  
7.70  
7.70  
7.66  
7.26  
6.97  
6.96  
6.95  
6.94  
6.93  
6.92  
6.88  
6.87

4.07  
4.05  
4.03  
3.94  
3.89

2.45  
2.43  
2.40  
2.24  
1.93  
1.91  
1.88  
1.86  
1.84

**<sup>1</sup>H NMR of 76 in CDCl<sub>3</sub>  
300 MHz**

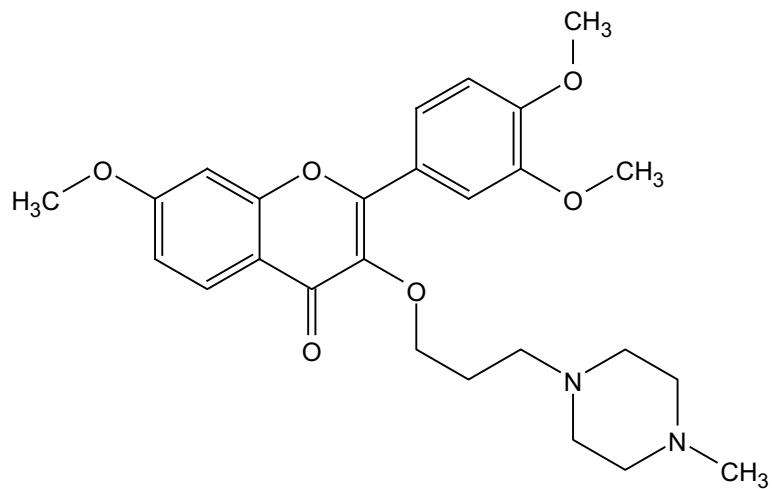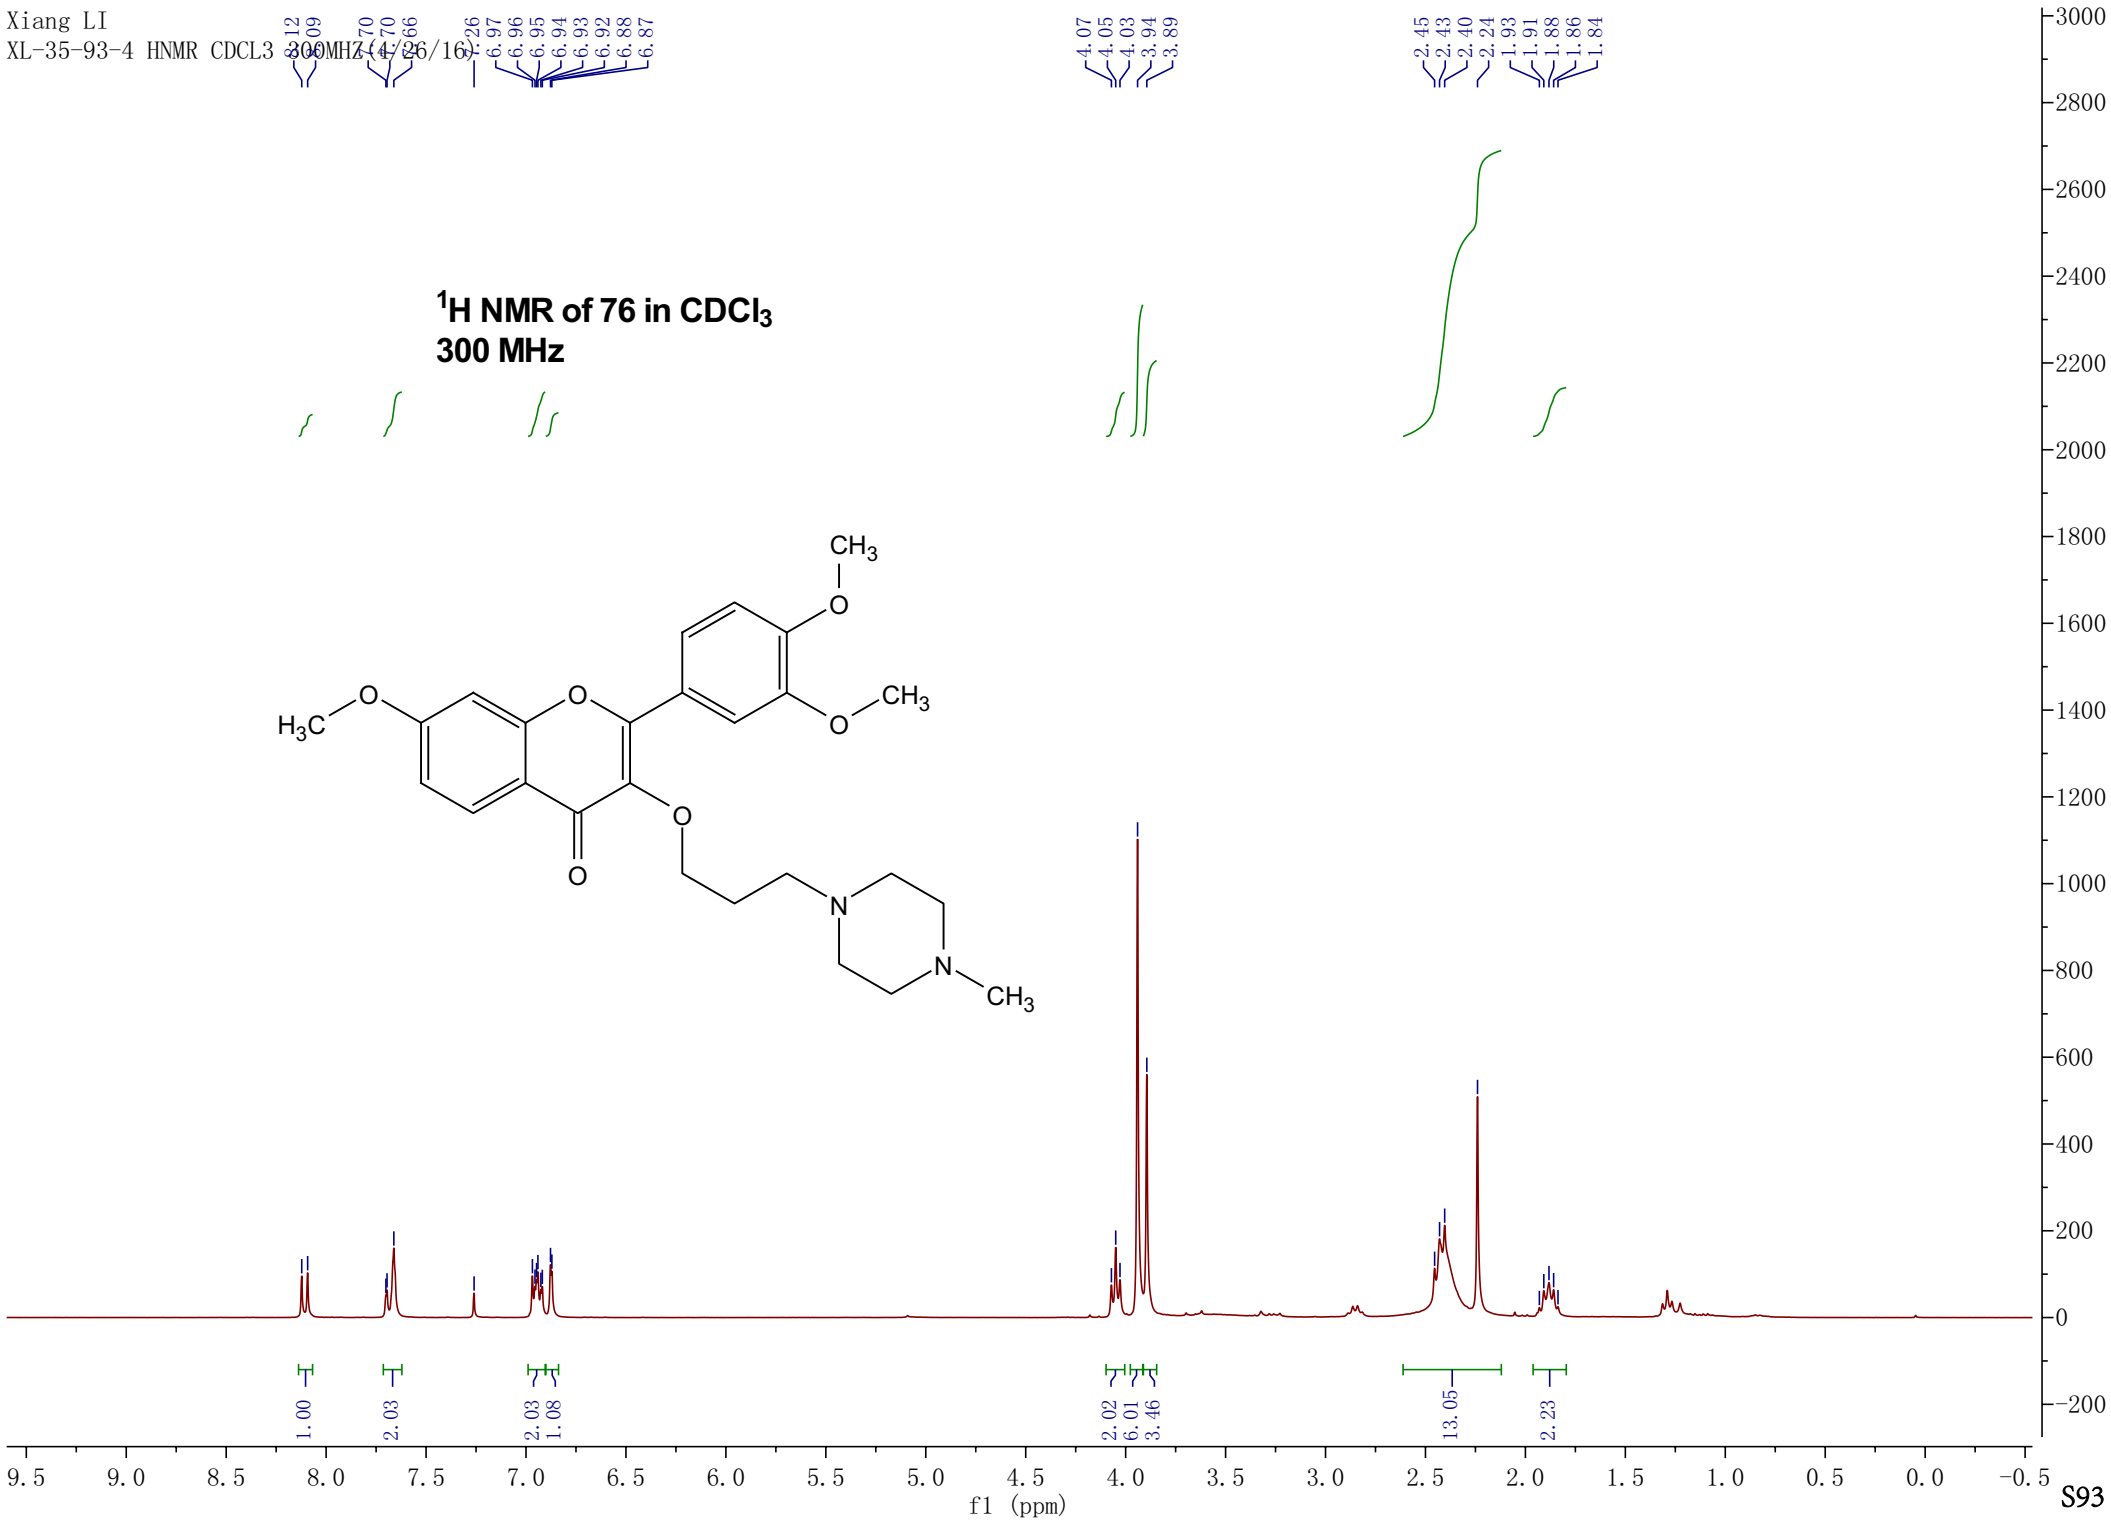

Xiang LI

XL-35-93-4 CNMR CDCl<sub>3</sub> 75MHz (4/25/16)

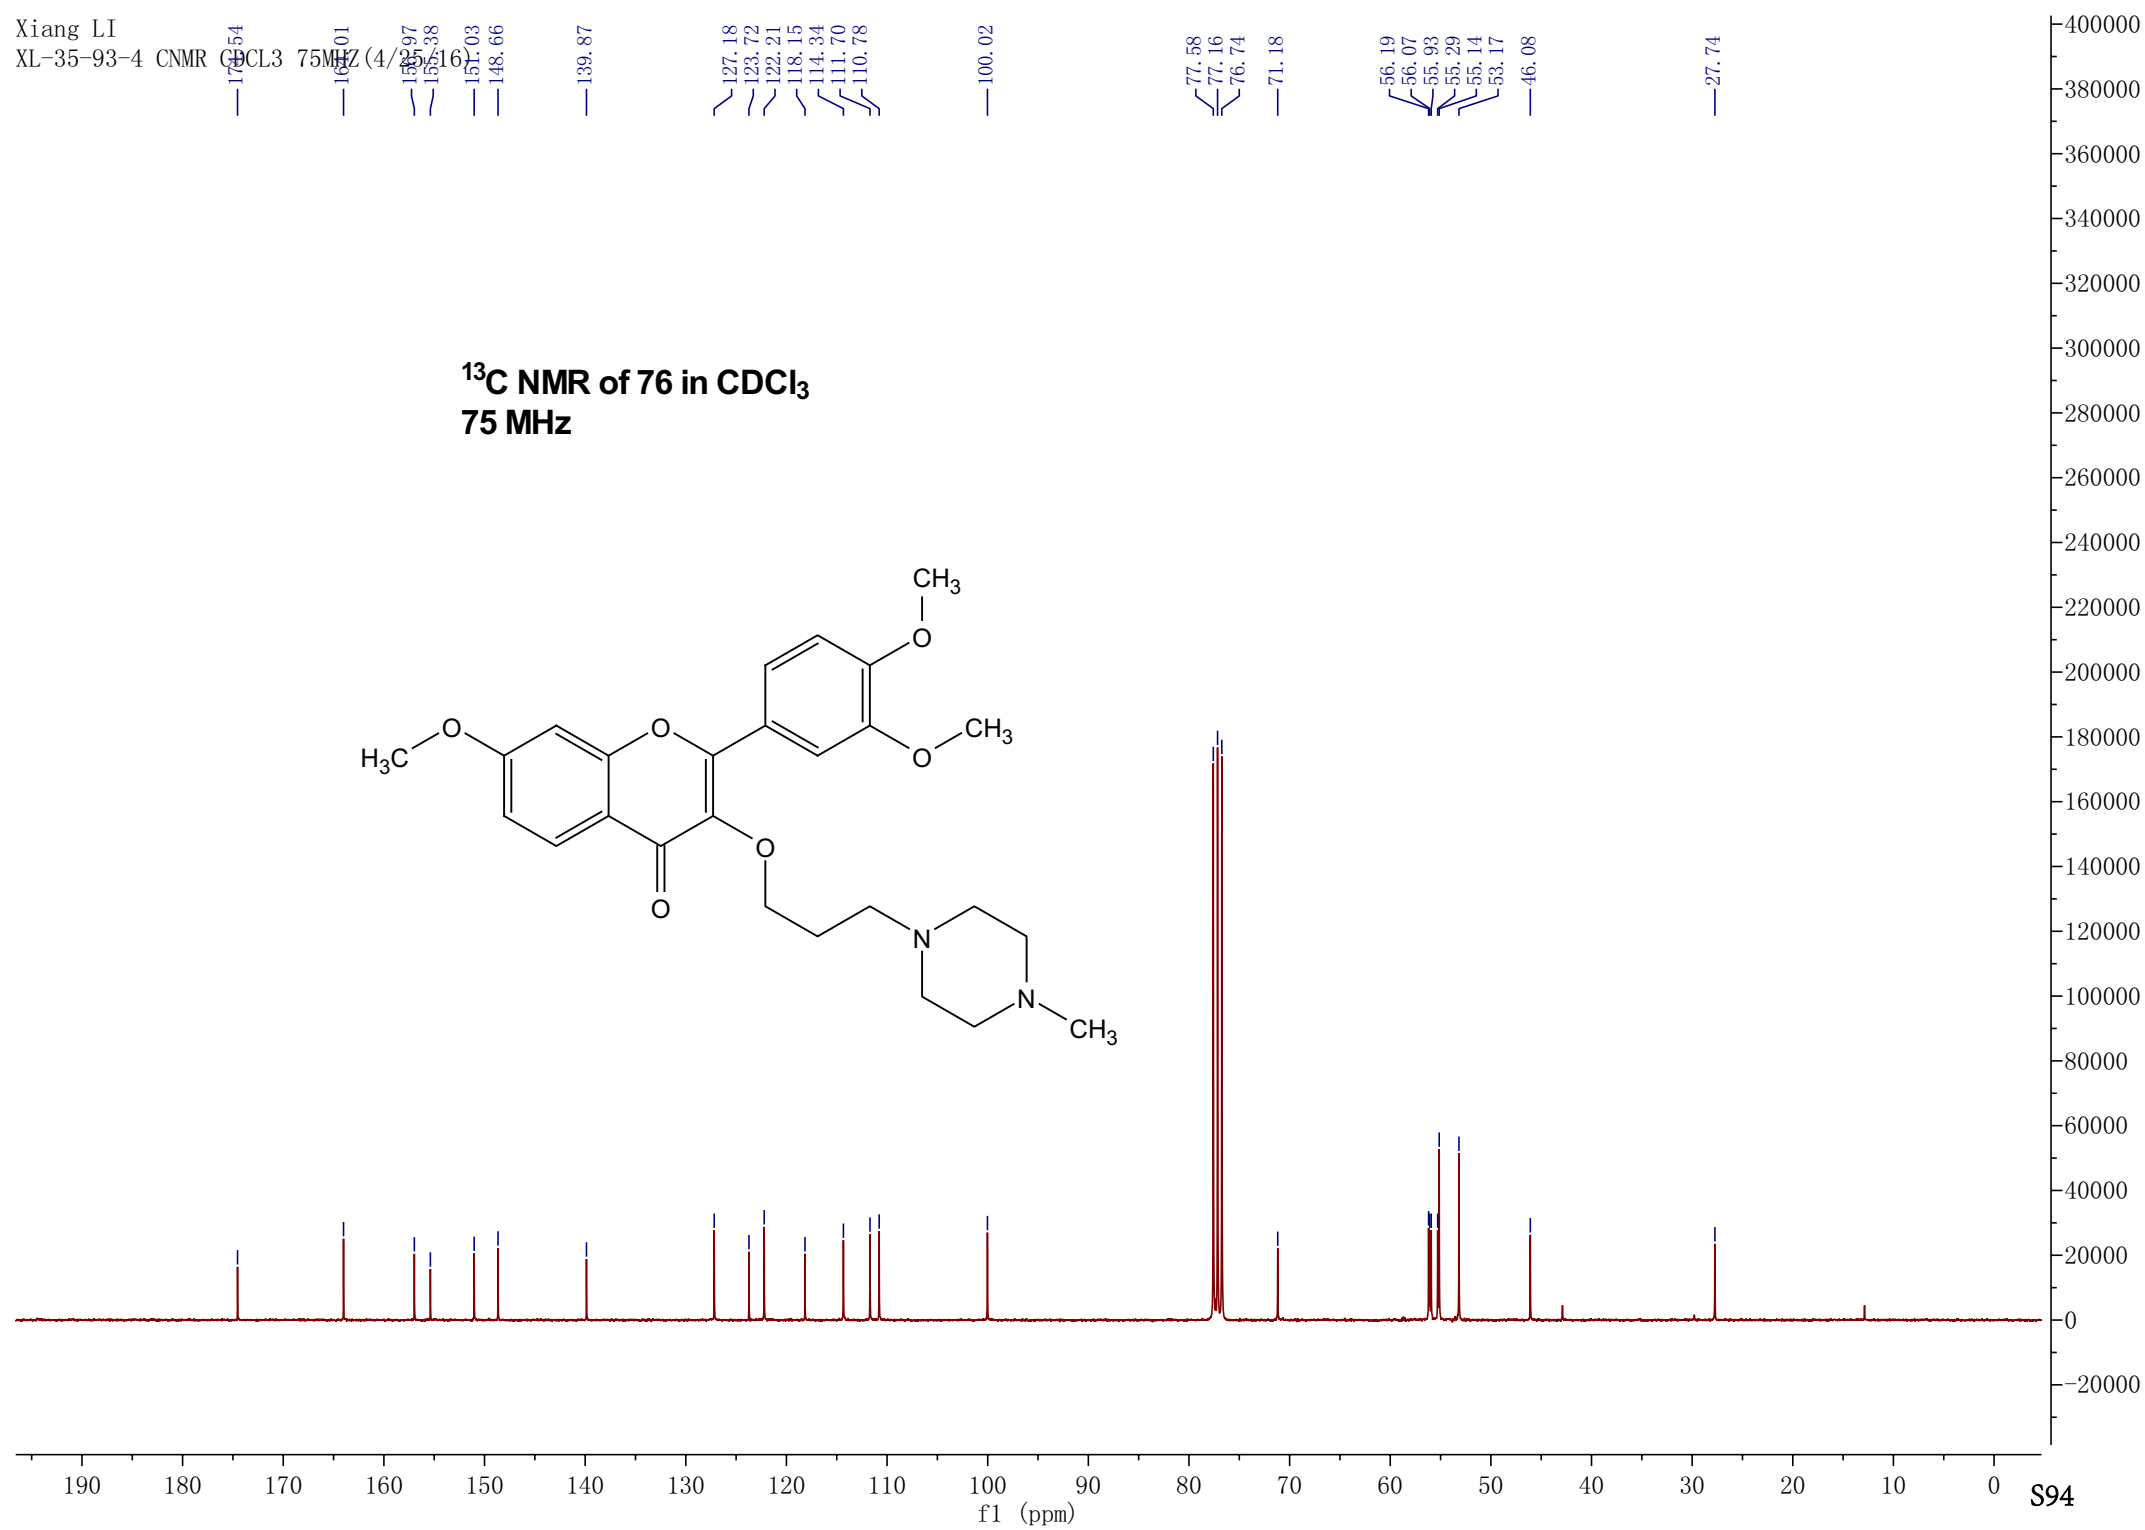

Xiang LI

XL-35-96-2 HNMR CDCL3 300MHz (4/27/16)

7.13  
7.10  
7.11  
6.99  
7.26  
6.98  
6.96  
6.93  
6.93  
6.89  
6.88

4.05  
4.03  
4.00  
3.95  
3.90

2.43  
2.35  
2.33  
2.30  
2.27  
1.77  
1.74  
1.72  
1.69  
1.67  
1.61  
1.58  
1.56  
1.53  
1.51

**<sup>1</sup>H NMR of 77 in CDCl<sub>3</sub>  
300 MHz**

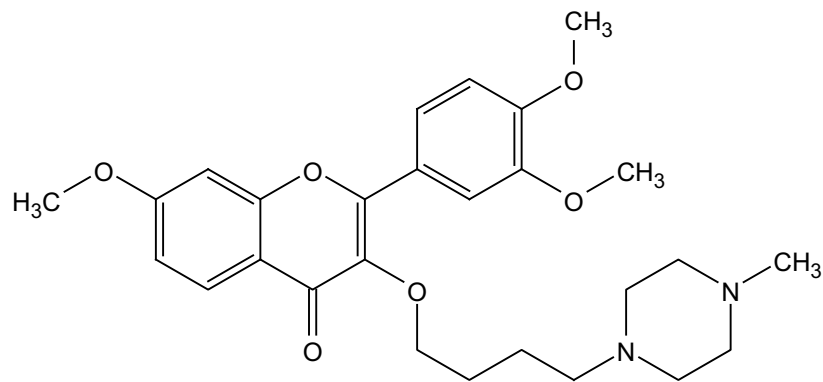

Integration curves (green) for the aromatic region (6.8-7.2 ppm).

Integration curves (green) for the piperazine and piperidine methyl groups (3.9-4.1 ppm).

Integration curves (green) for the aliphatic region (1.5-2.5 ppm).

Integration values (green) for the aromatic region: 1.00, 2.02, 2.00, 1.04.

Integration values (green) for the piperazine and piperidine methyl groups: 2.01, 6.04, 3.09.

Integration values (green) for the aliphatic region: 12.97.

Integration values (green) for the aliphatic region: 2.13, 2.16.

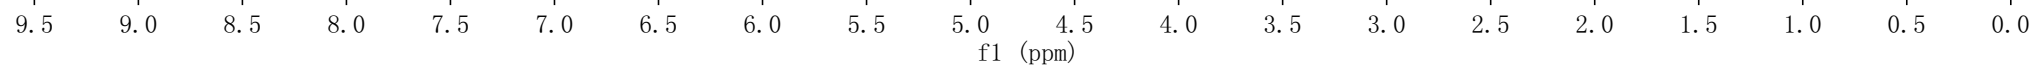

Xiang LI

XL-35-96-2 CNMR CDCL3 75 MHz (4/25/16)

**<sup>13</sup>C NMR of 77 in CDCl<sub>3</sub>  
75 MHz**

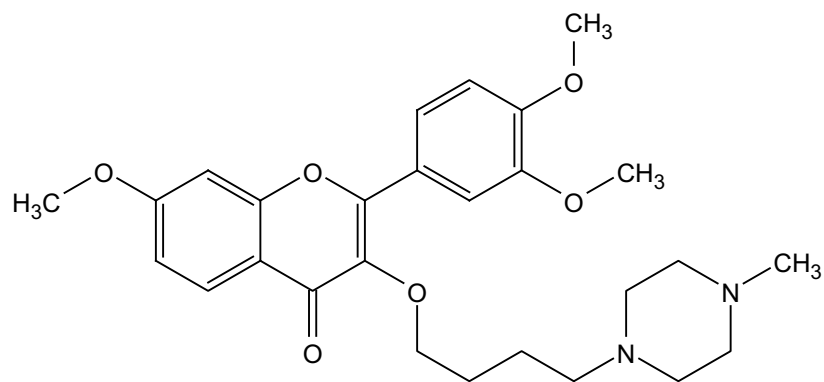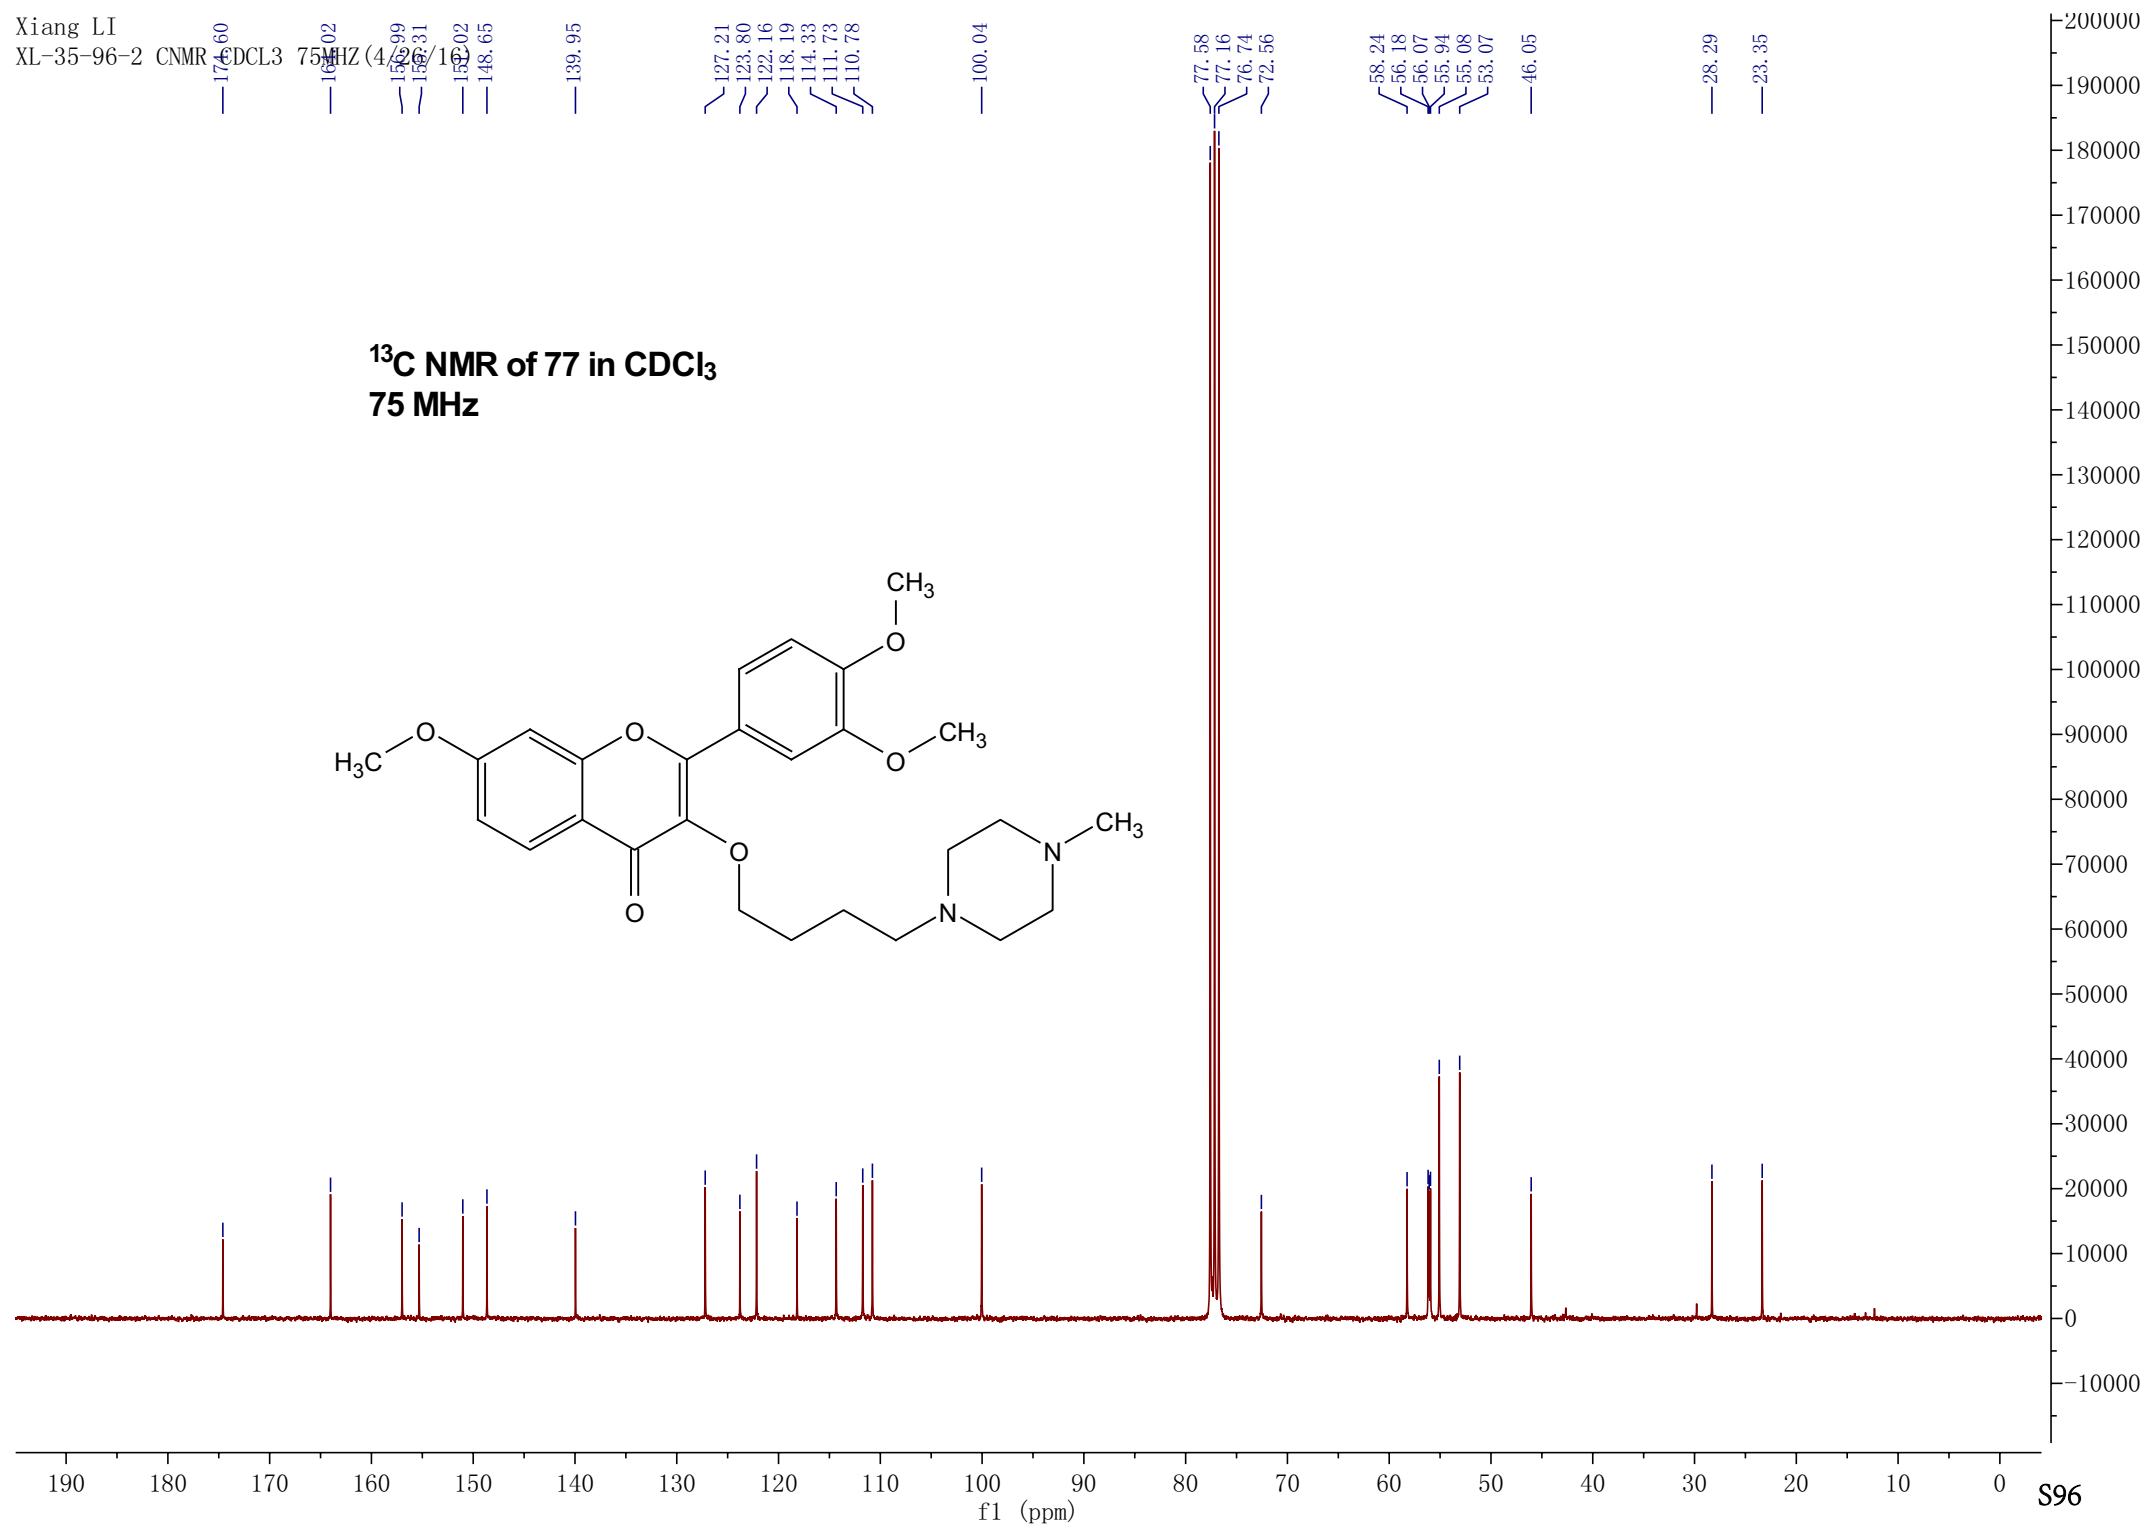

Xiang LI

XL-35-97-5 HNMR CDCl<sub>3</sub> 300MHz (4/28/16)

8.13  
8.10  
7.70  
6.68  
2.26  
6.98  
6.96  
6.95  
6.93  
6.92  
6.88  
6.88

4.02  
3.99  
3.97  
3.95  
3.94  
3.90

2.46  
2.31  
2.28  
1.77  
1.74  
1.72  
1.69  
1.67  
1.52  
1.50  
1.47  
1.46  
1.45  
1.42  
1.41  
1.39  
1.36  
1.34

**<sup>1</sup>H NMR of 78 in CDCl<sub>3</sub>  
300 MHz**

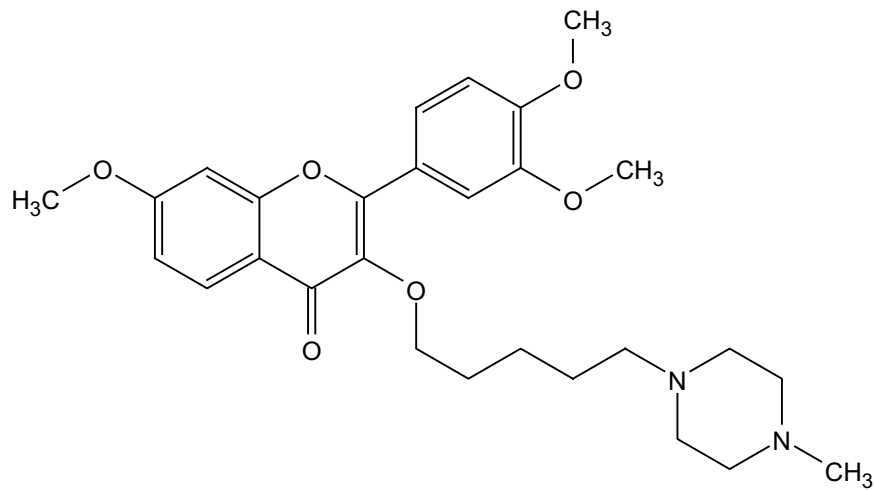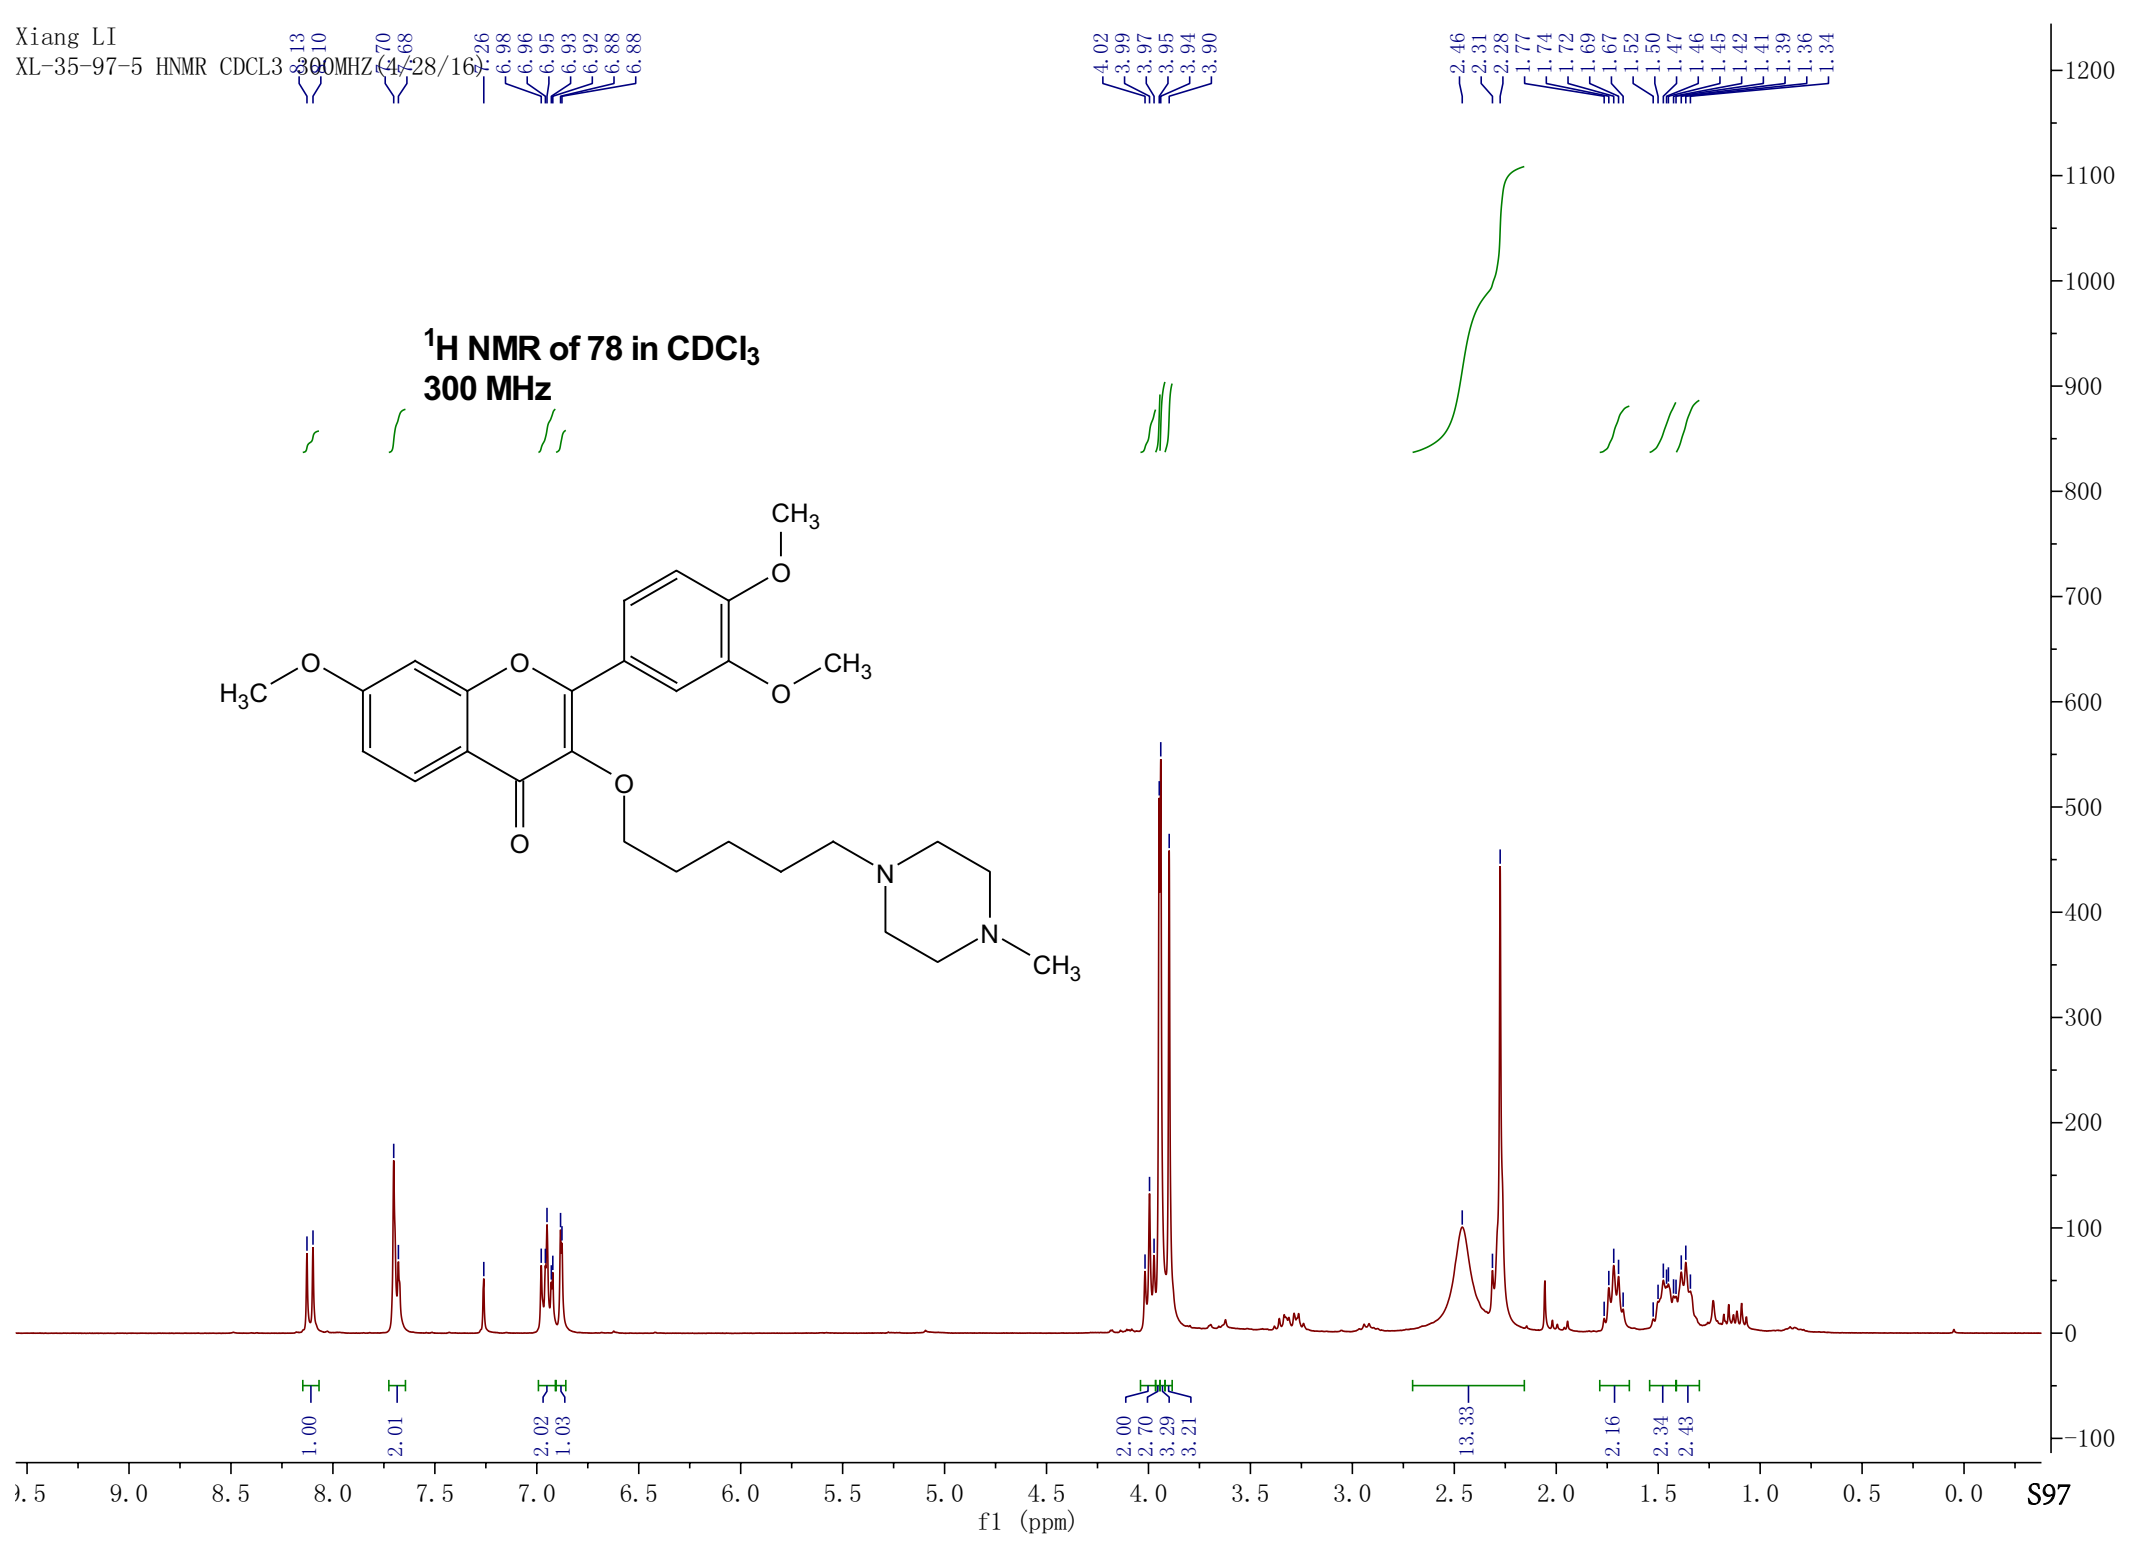

Xiang LI

XL-35-97-5 CNMR CDCl<sub>3</sub> 75MHz (4/27/16)

**<sup>13</sup>C NMR of 78 in CDCl<sub>3</sub>  
75 MHz**

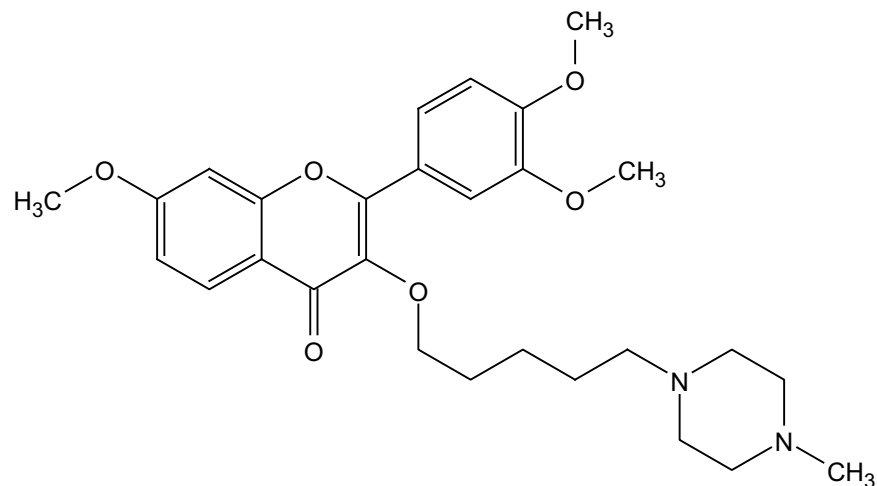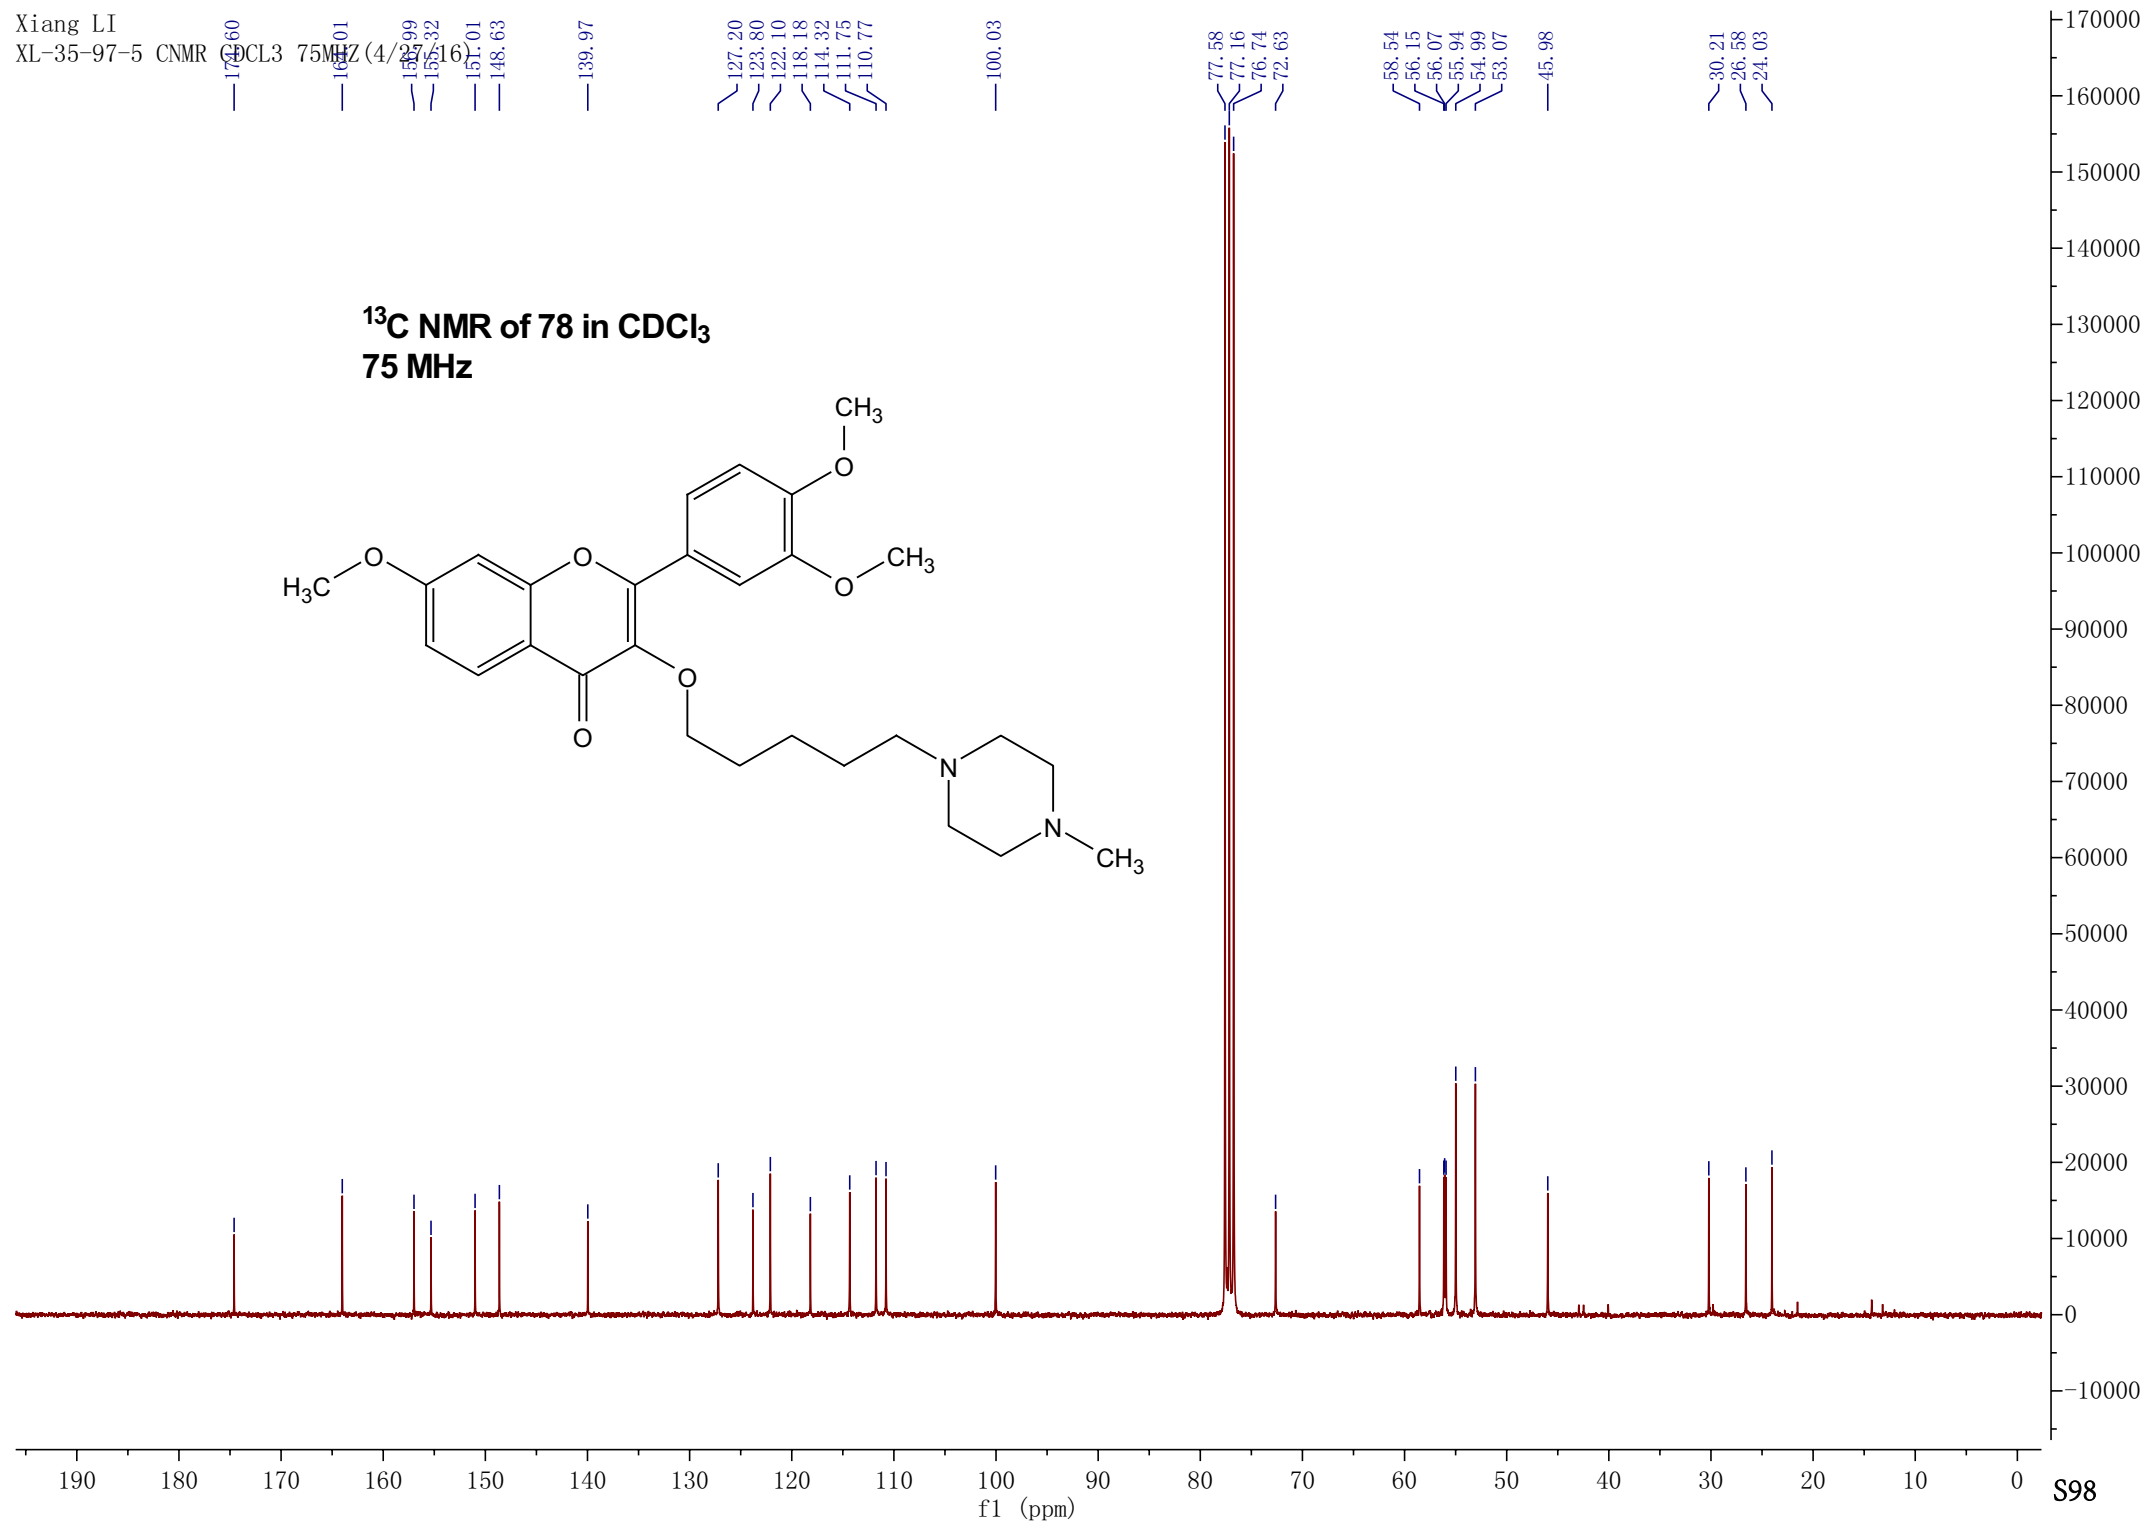

300 MHz (5/24/16)

**<sup>1</sup>H NMR of 79 in CDCl<sub>3</sub>  
300 MHz**

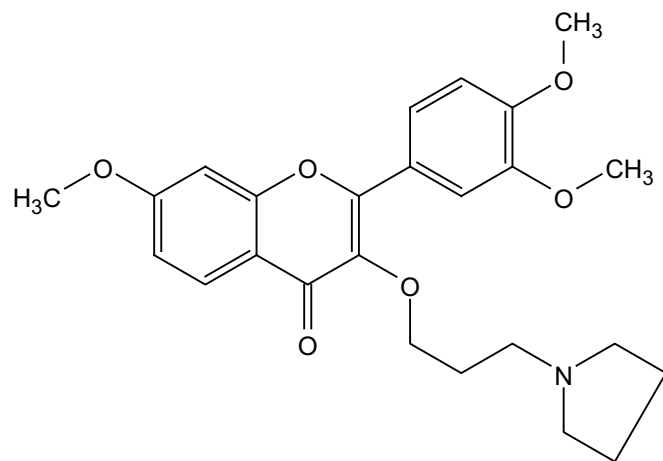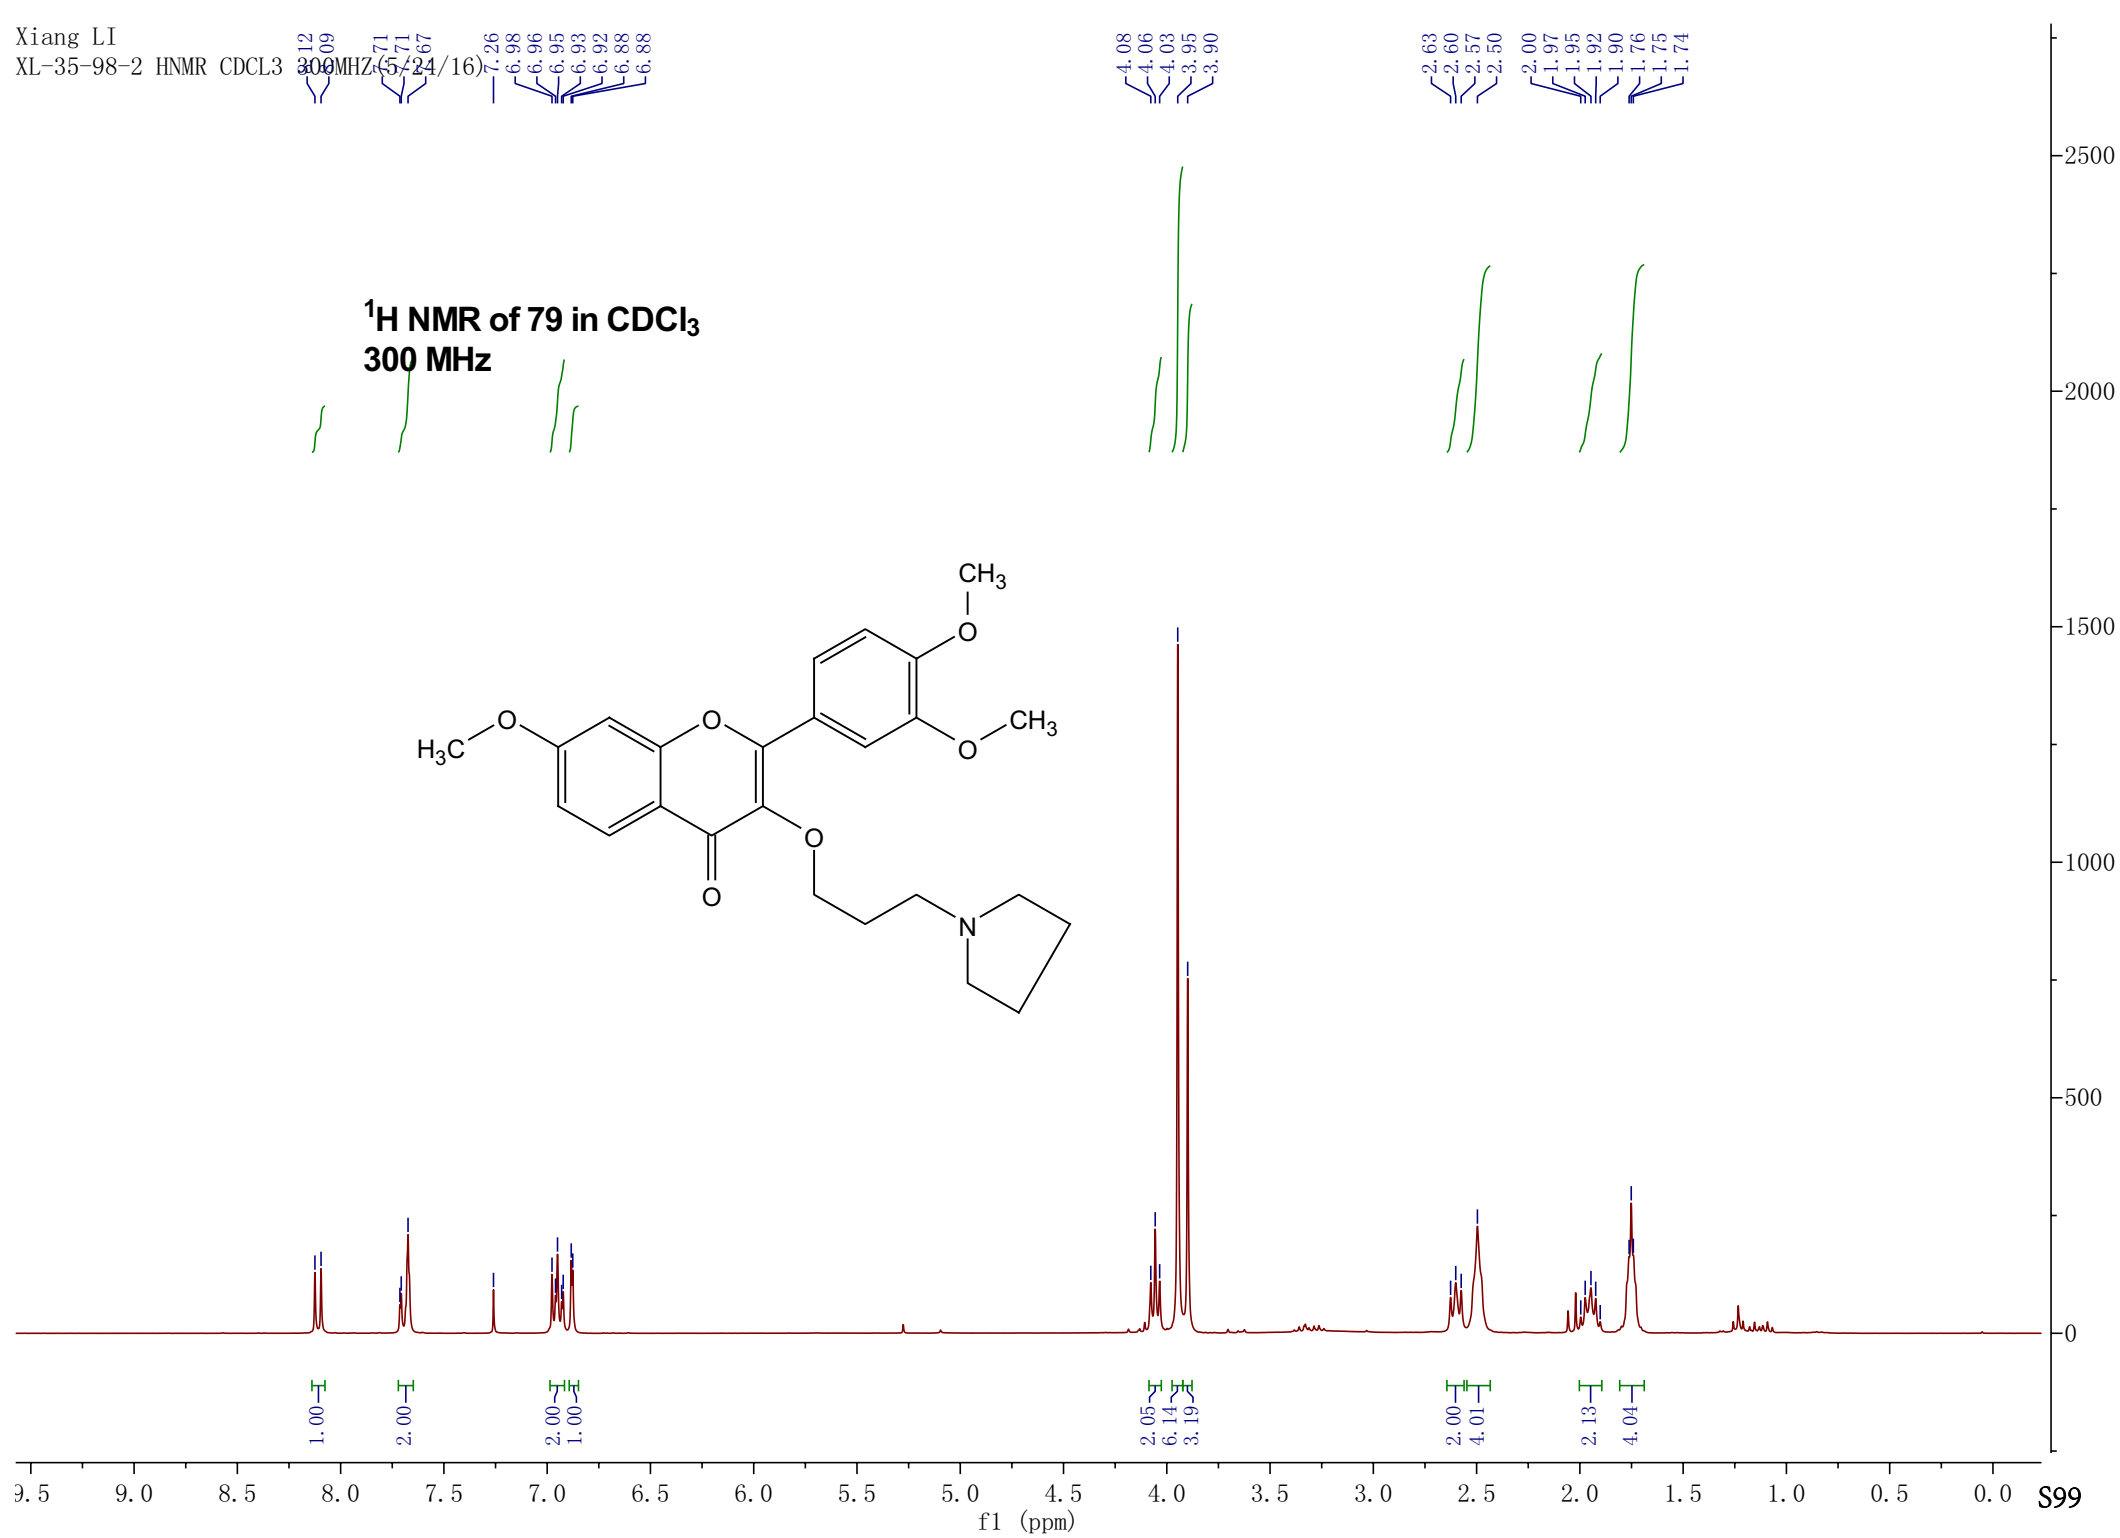





8.13  
8.10  
7.73  
7.70  
7.00  
6.99  
6.88  
7.26  
7.00  
6.97  
6.94  
6.94  
6.90  
6.89

4.03  
4.01  
3.99  
3.96  
3.95  
3.91

2.64  
2.62

1.83  
1.74

**<sup>1</sup>H NMR of 80 in CDCl<sub>3</sub>  
300 MHz**

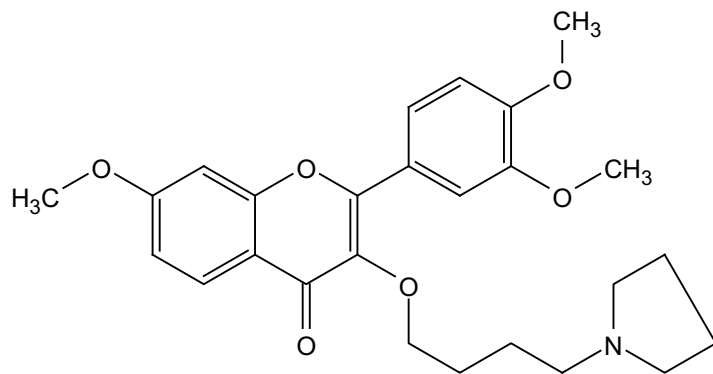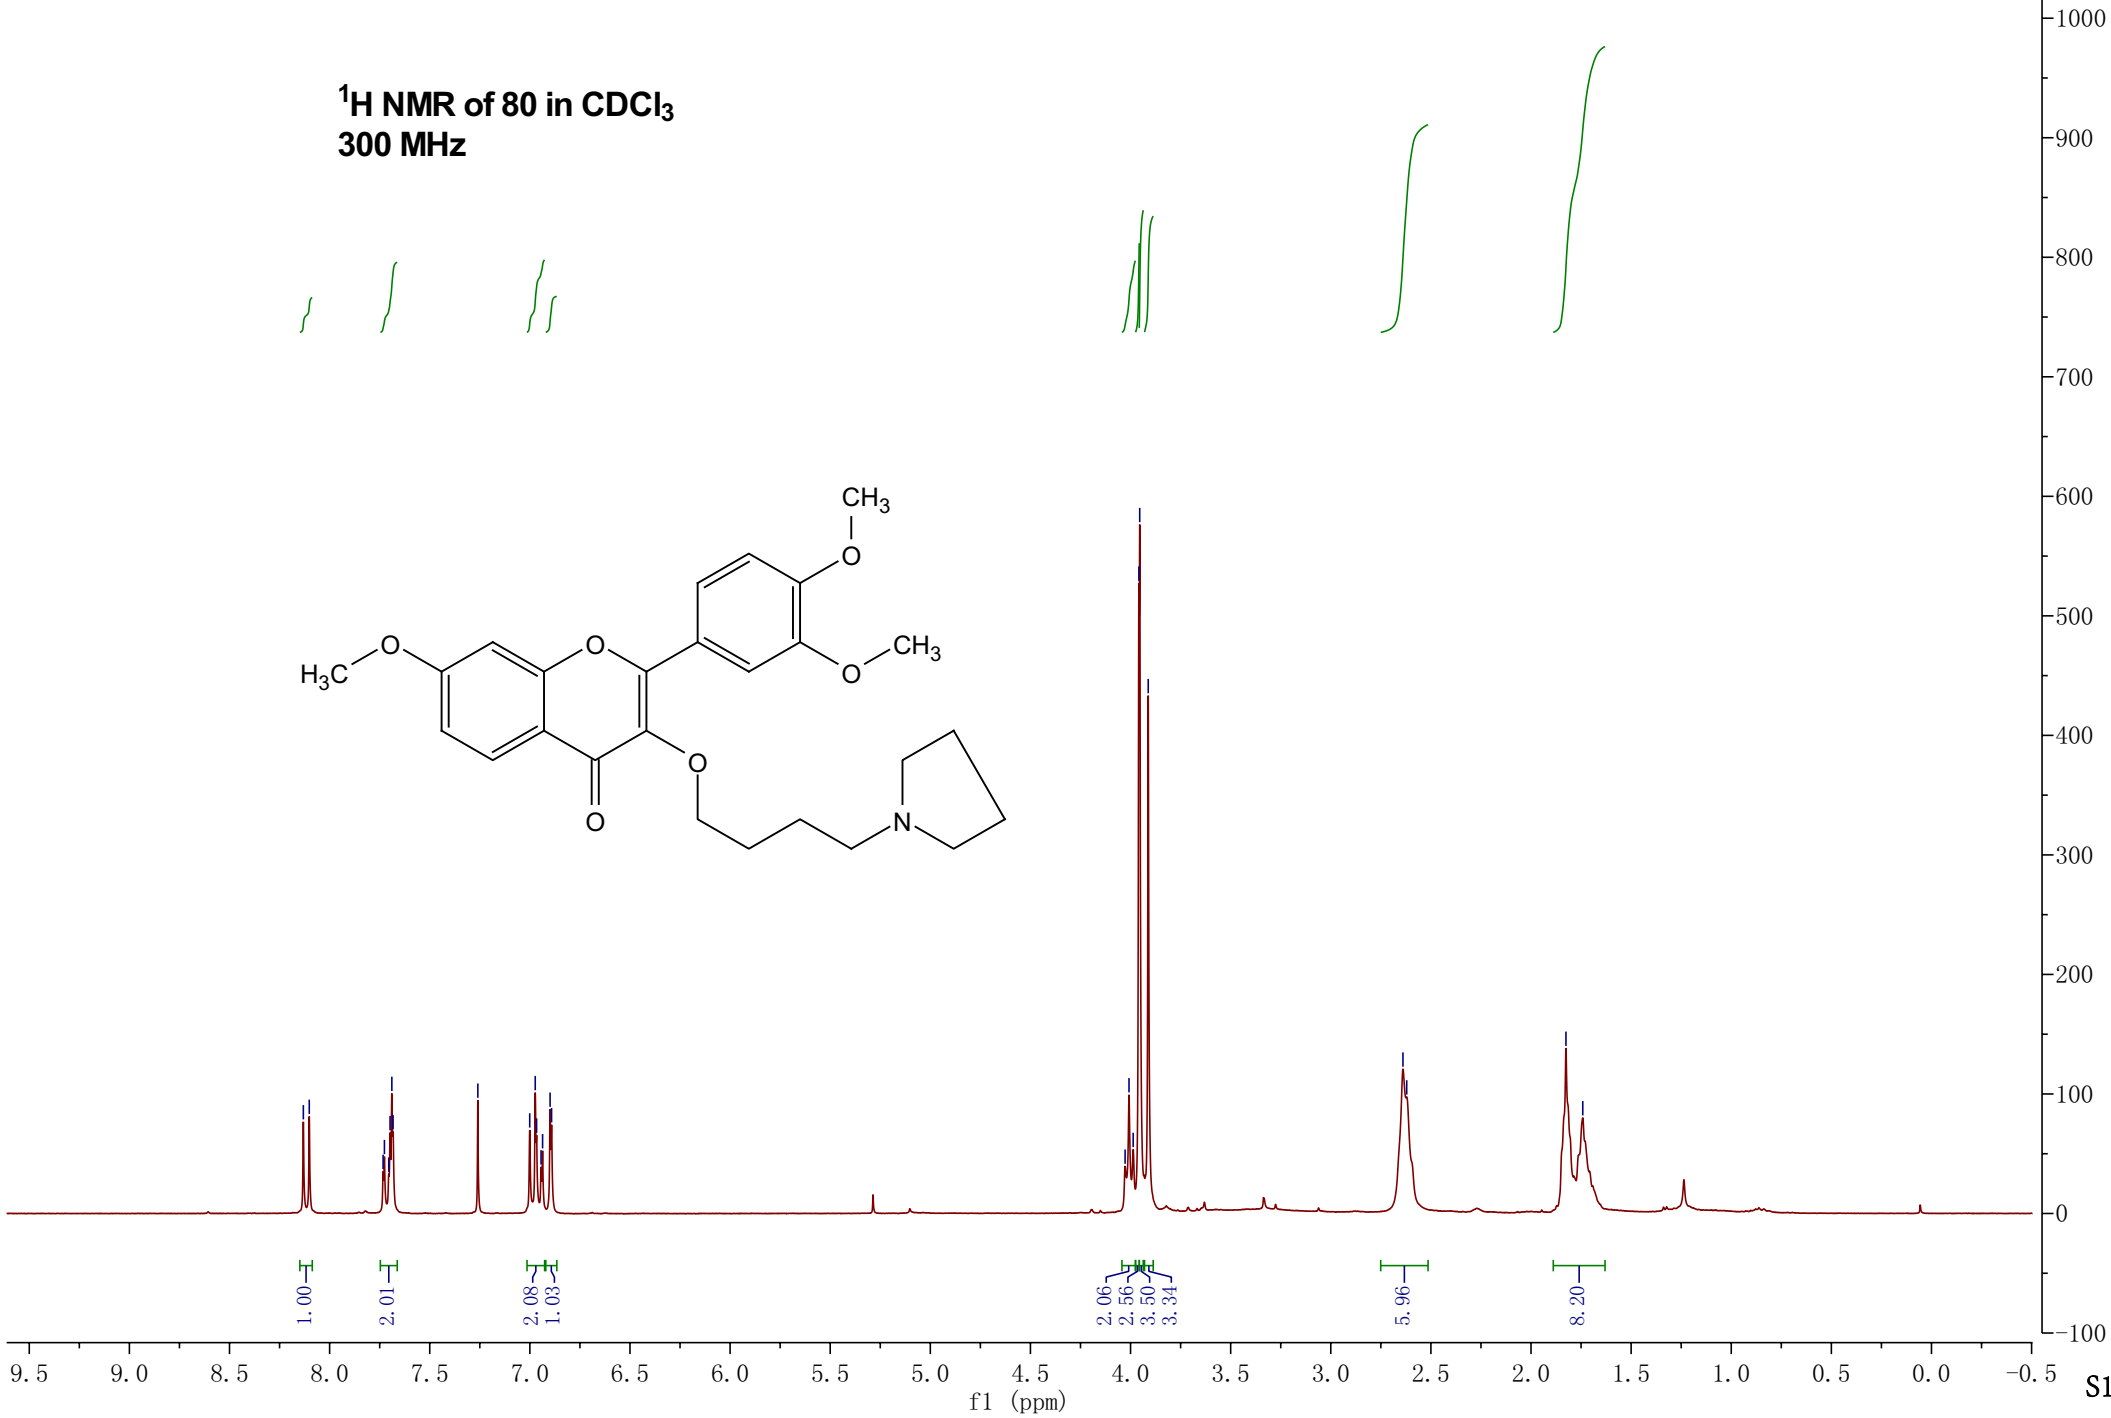

Xiang LI

XL-35-94-4 CNMR CDCL3 75MHz (5/2/1/6)

**<sup>13</sup>C NMR of 80 in CDCl<sub>3</sub>  
75 MHz**

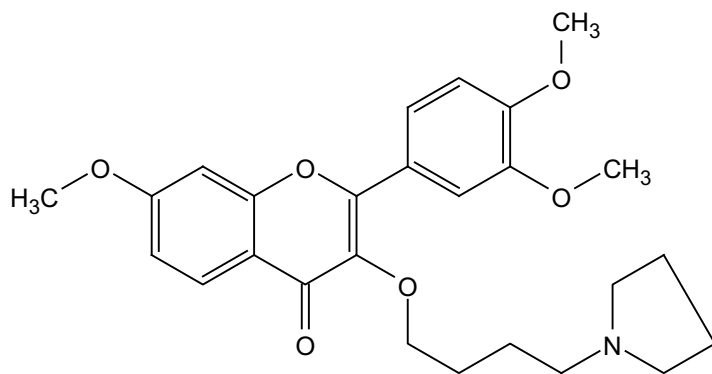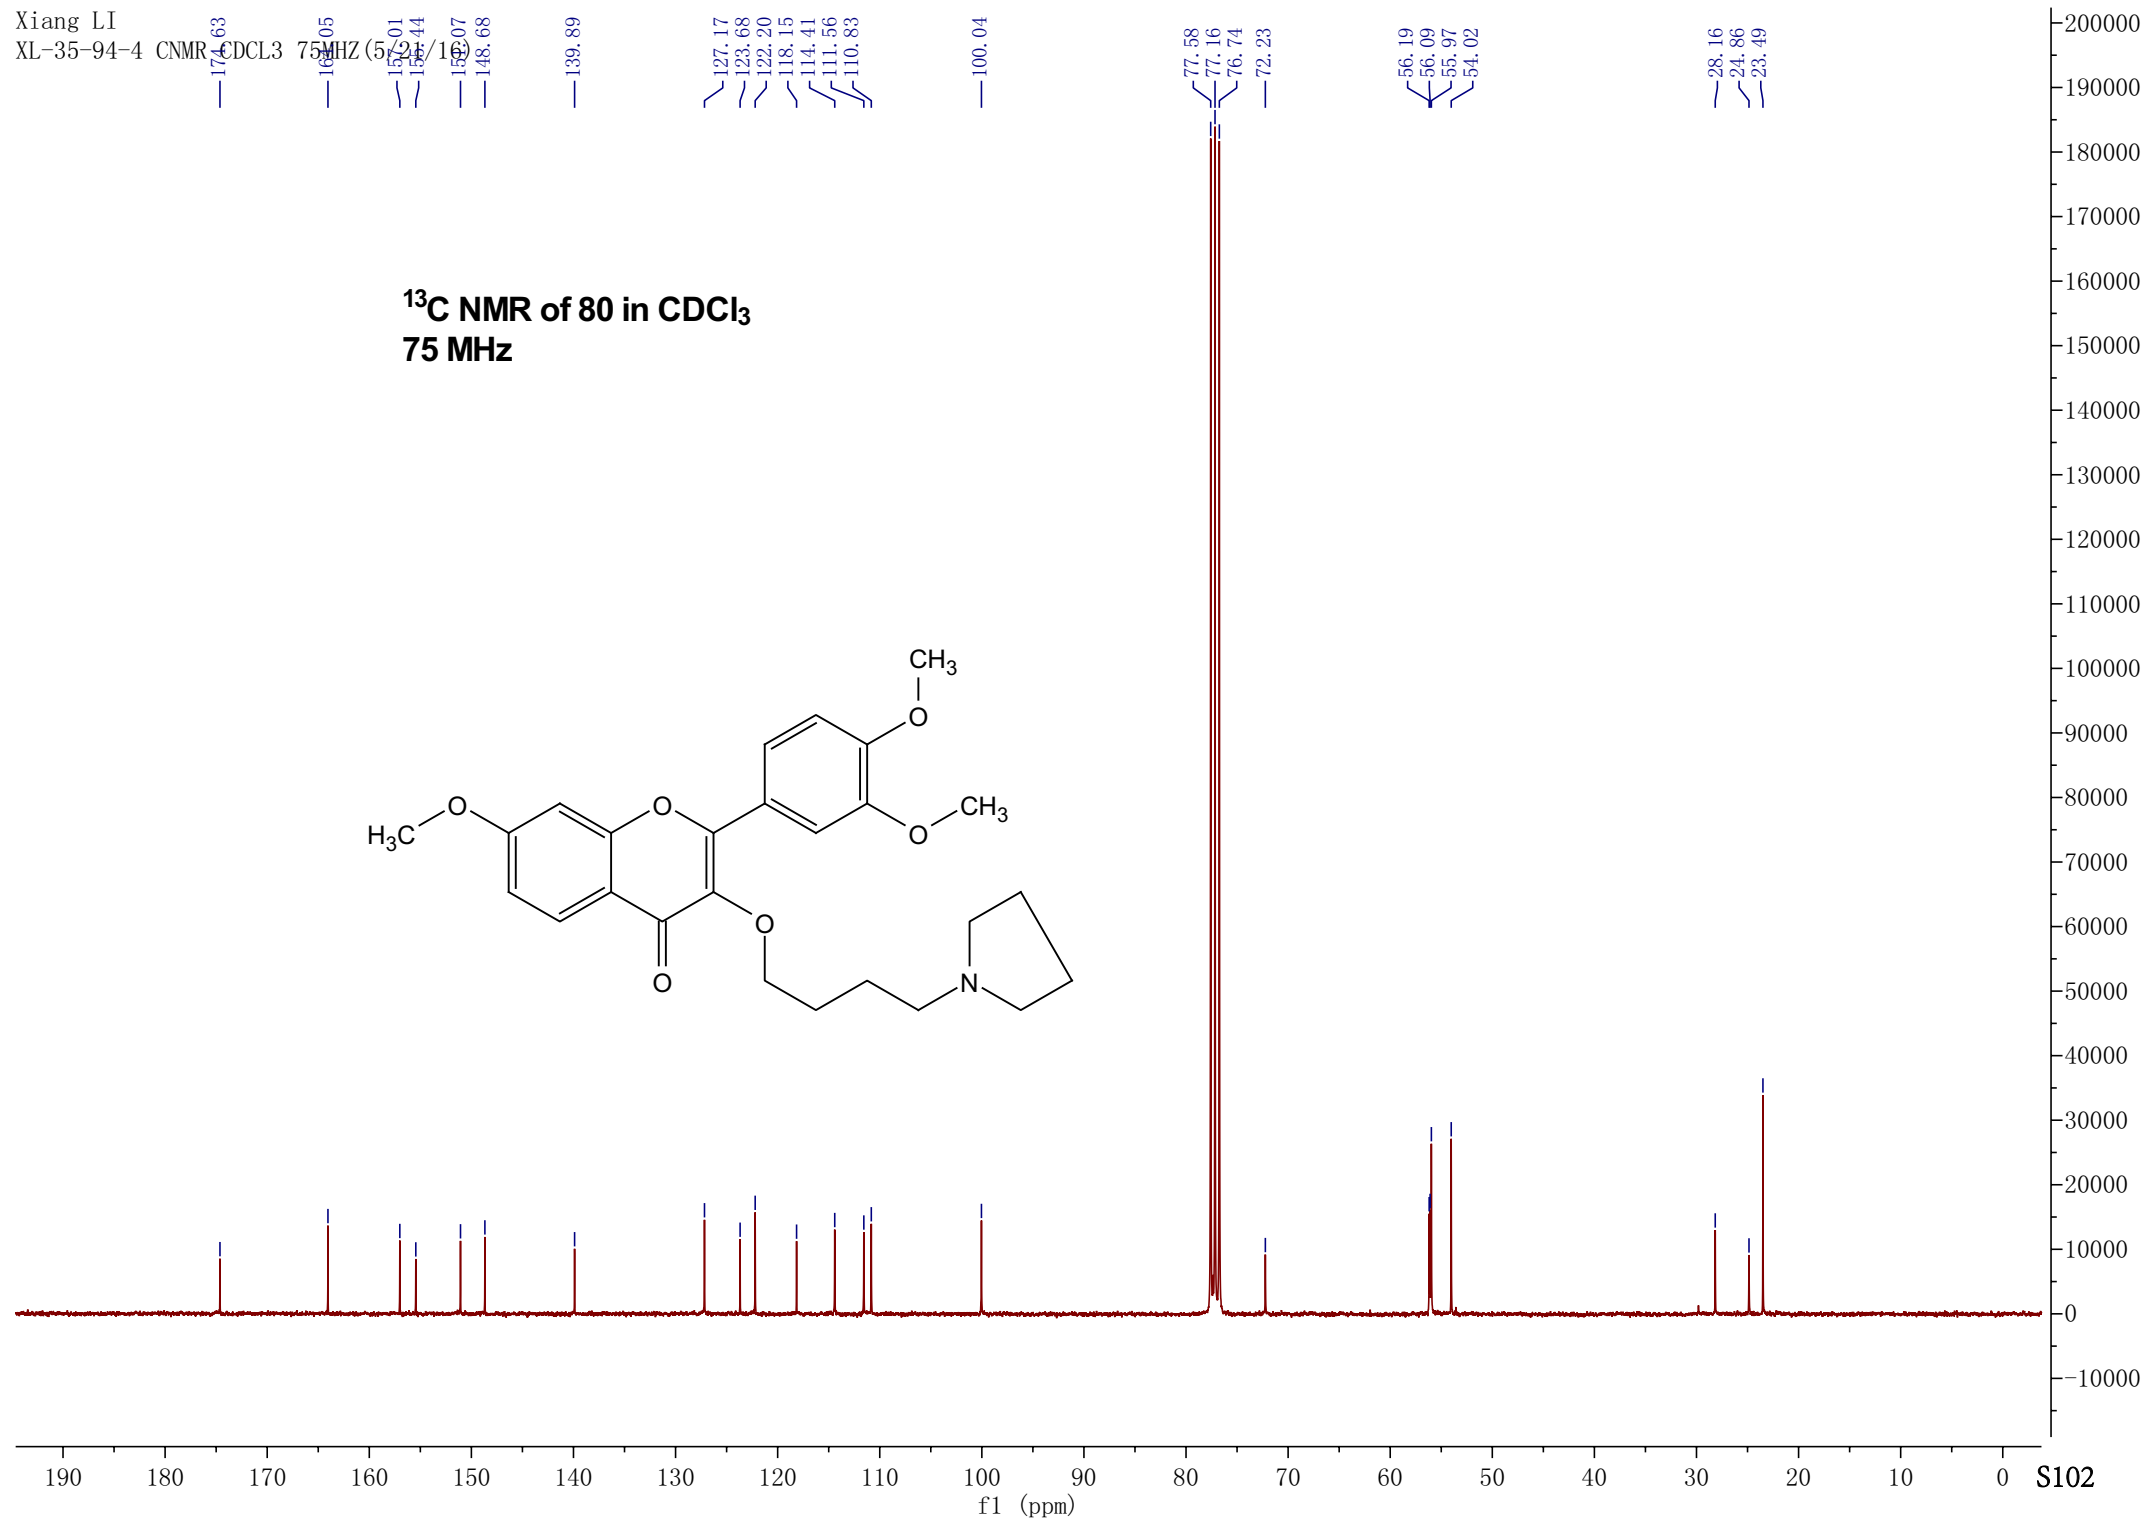

8.13  
8.10  
7.73  
7.70  
7.00  
6.99  
6.88  
7.26  
7.00  
6.97  
6.94  
6.94  
6.90  
6.89

4.03  
4.01  
3.99  
3.96  
3.95  
3.91

2.64  
2.62

1.83  
1.74

**<sup>1</sup>H NMR of 80 in CDCl<sub>3</sub>  
300 MHz**

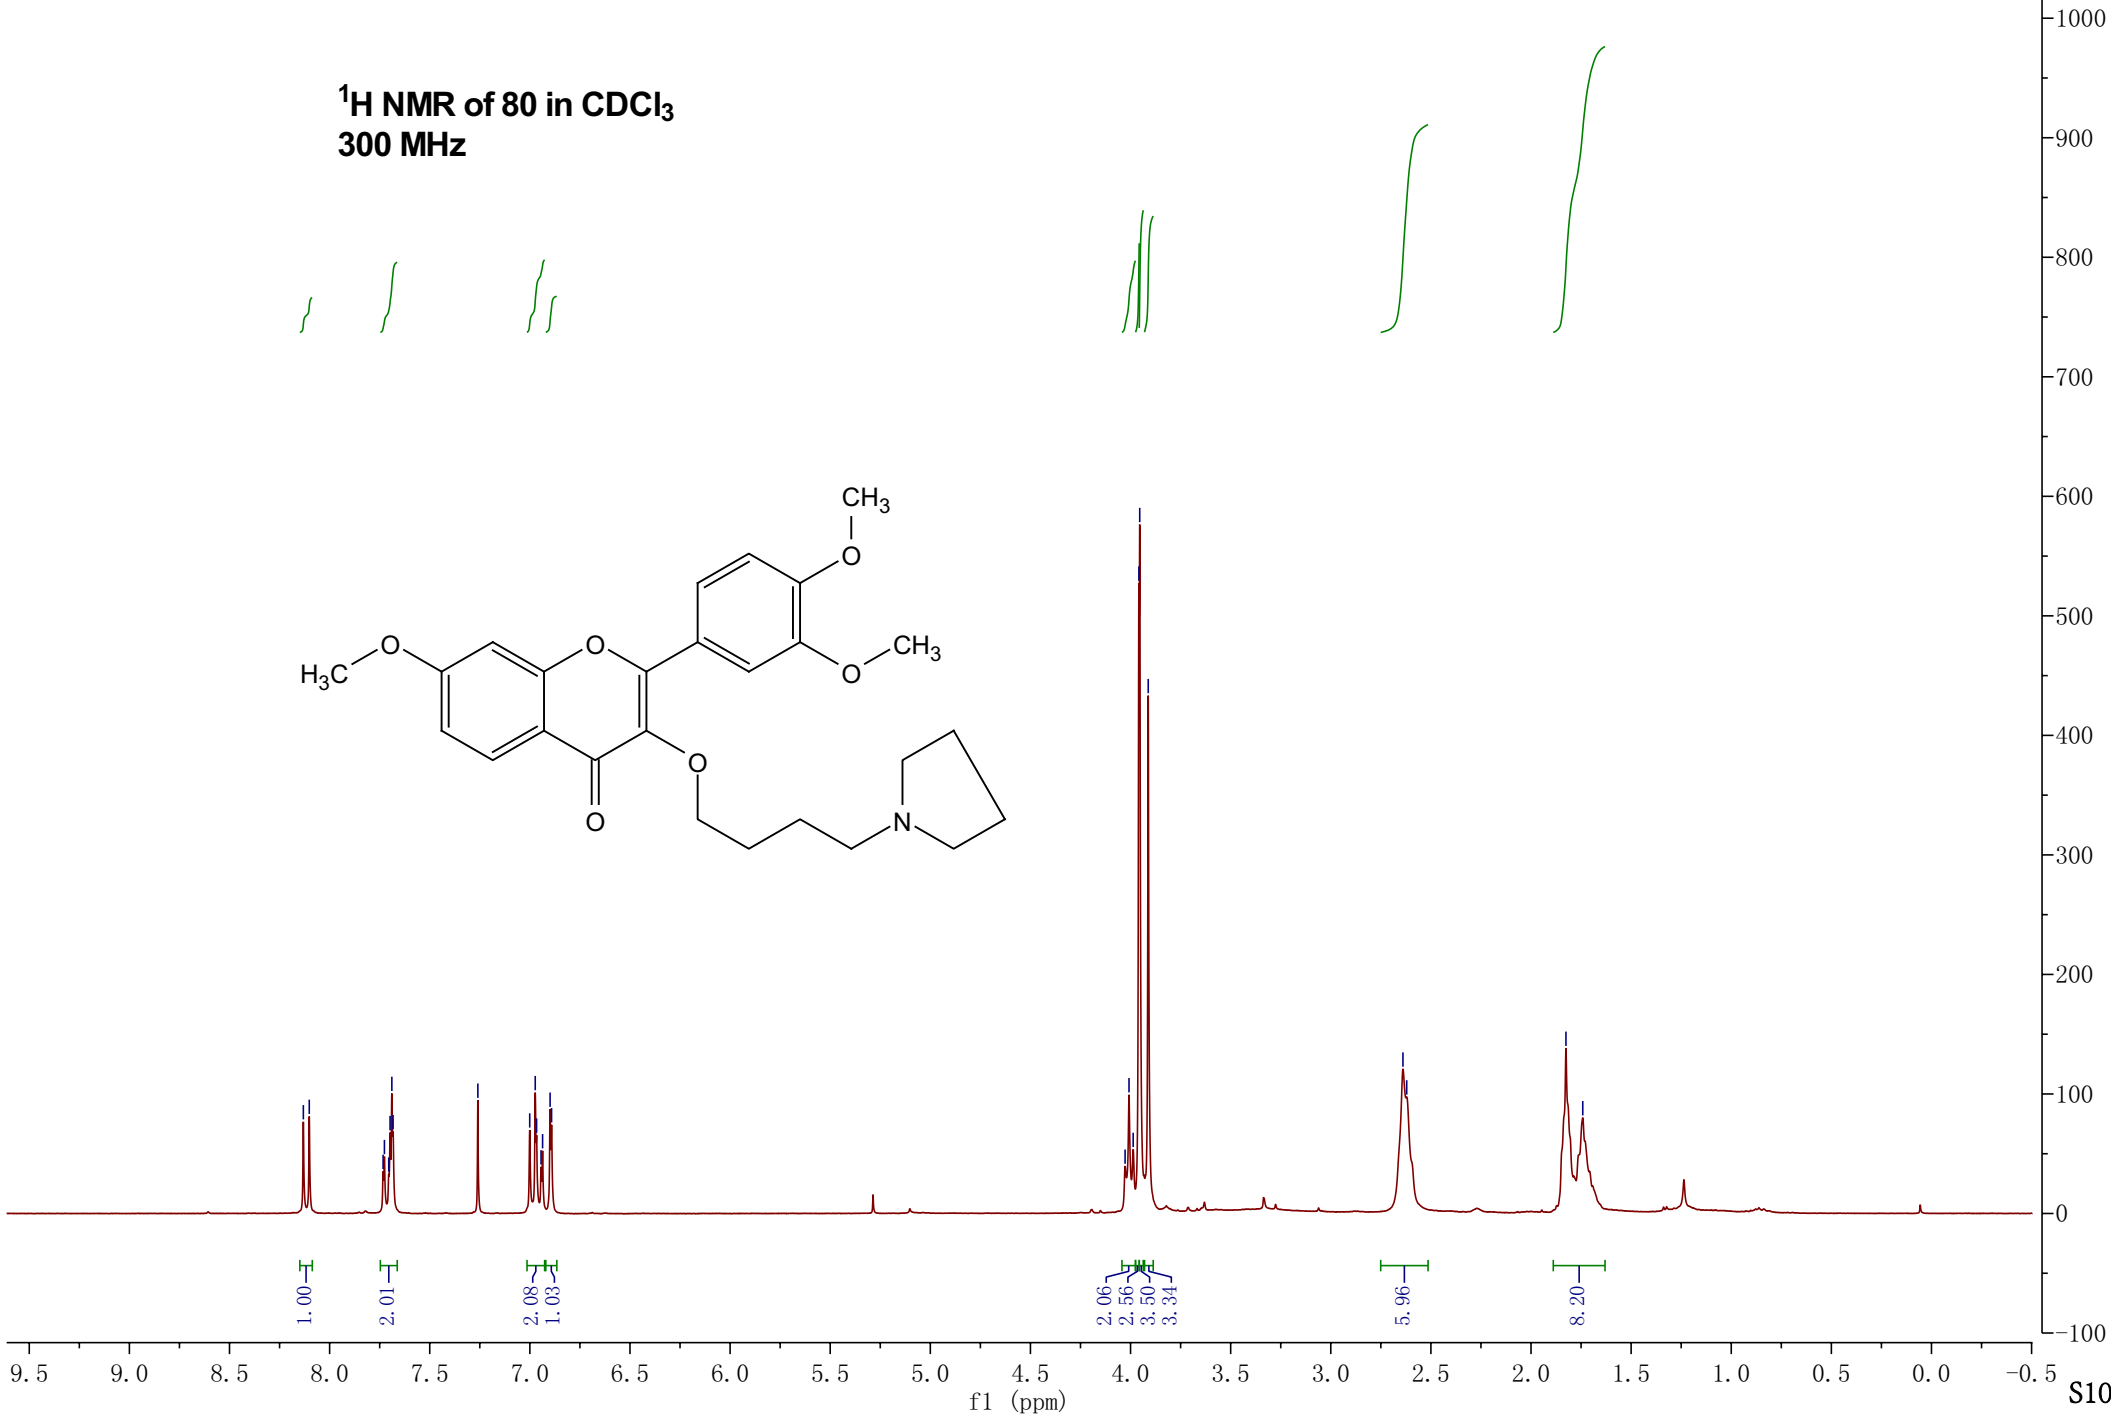

Xiang LI  
XL-35-99-2 CNMR CDCl3 75MHz (5/5/16)

**<sup>13</sup>C NMR of 81 in CDCl<sub>3</sub>  
75 MHz**

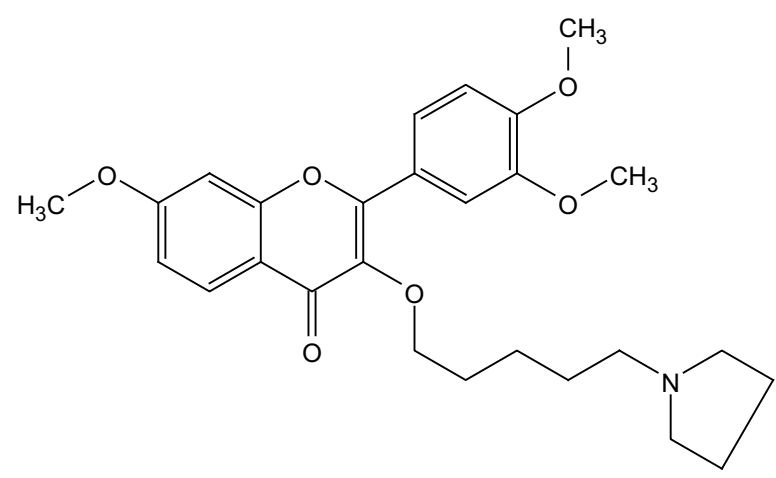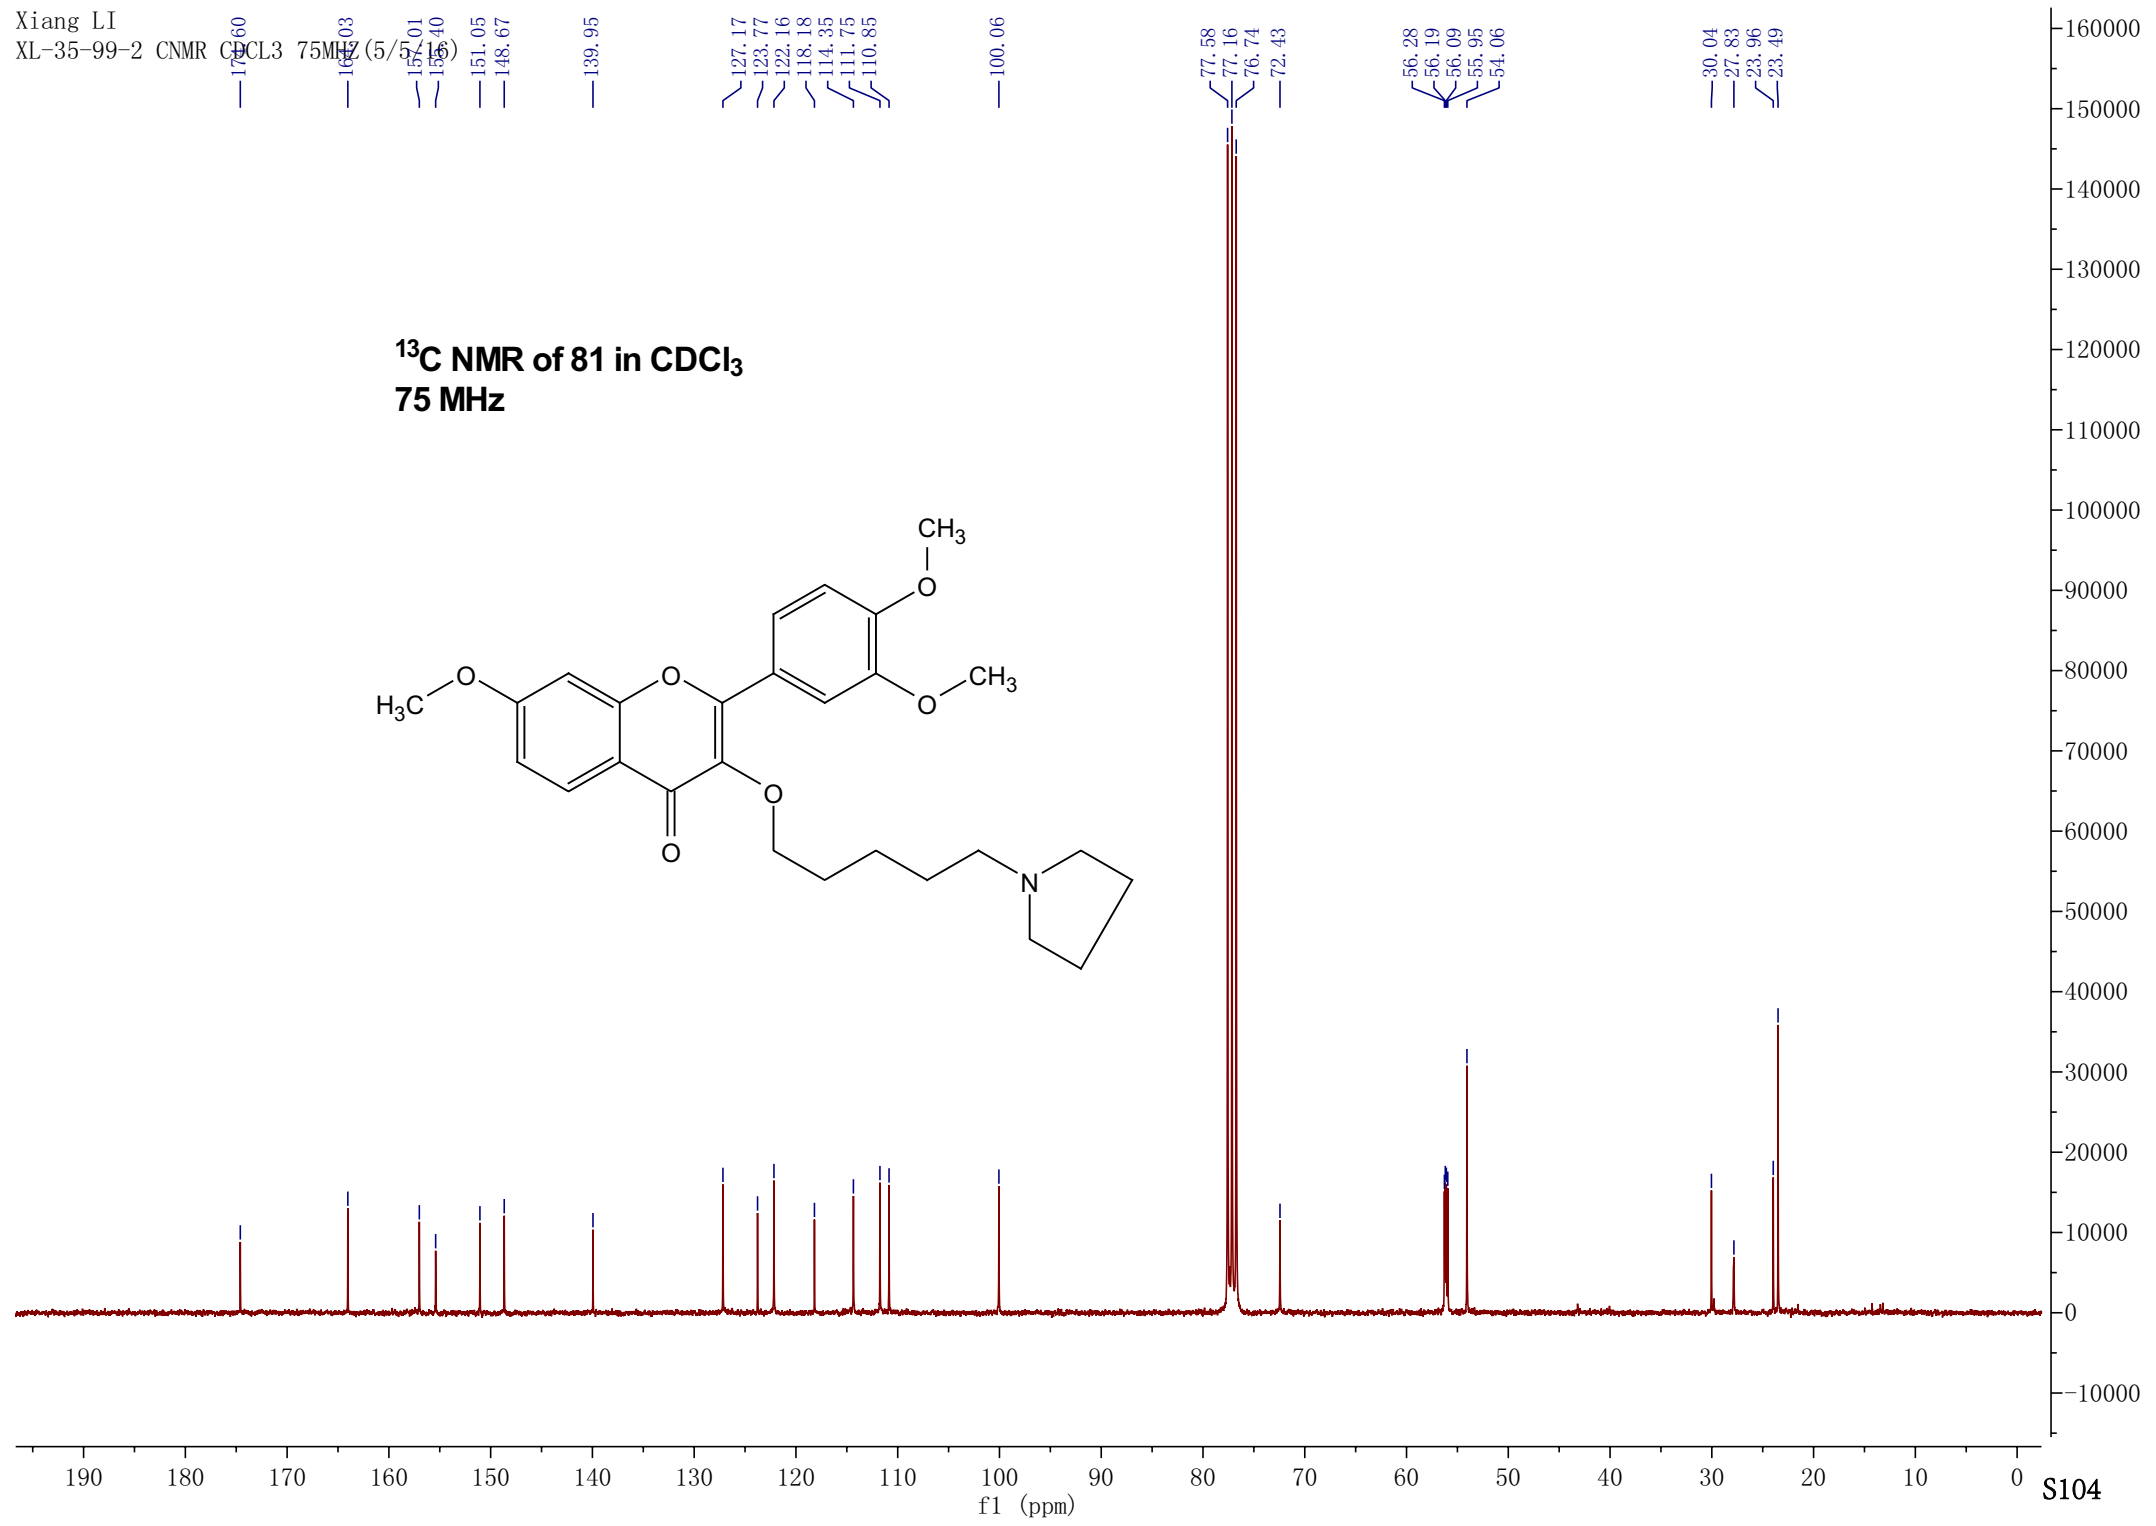

Supplement: NIHMS1511030-supplement-1.pdf [file NIHMS1511030-supplement-1.pdf]
